# Supplementary material for: Pestalotioid Species Associated with Medicinal Plants in Southwest China and Thailand
Source: PubMed Central journal article supplement (PMC9927317; doi:10.1128/spectrum.03987-22), 2023-01-10
Supplement: spectrum.03987-22-s0001.pdf [file spectrum.03987-22-s0001.pdf]

*Neopestalotiopsis* alignment

>AH11

CATTATAGAGTTTTCTAAACTCCCAACCCATGTGAACTTACCTTTTGTTCCTCGGCAGAAGTTAT  
AGGTCTTCTTATAGCTGCTGCCGGTGGACCATTAAACTCTTGTTATTTTATGTAATCTGAGCGTCT  
TATTTTAATAAGTCAAAACTTTCAACAACGGATCTCTTGTTCTGGCATCGATGAAGAACGCAGC  
GAAATGCGATAAGTAATGTGAATTGCAGAATTCAGTGAATCATCGAATCTTTGAACGCACATTG  
CGCCATTAGTATTCTAGTGGGCATGCCTGTTTCGAGCGTCATTTCAACCCCTAAGCCTAGCTTAG  
TGTTGGGAATCTACTTCTCTTAGGAGTTGTAGTTCCTGAAATACAACGGCGGATTTGTAGTATCC  
TCTGAGCGTAGTAA-

TTTTTTTCTCGCTTTTGTAGGTGCTATAACTCCCAGCCGCTAAACCCCAATTTTTTGTGGTTGAC  
CTCGGATCAGGT????????????TATTGATTCCCATCAT-----CATTCCCCTTCTC-

TTCAGCGTCATGATTTTCAACCTACGCGTTGAAAATTA-TTTTCGCTCCTTCCACAC--TTTT--  
TCGCTGGTTACCCCGCCGCGAGGCACCCGCACGACCCCGCGGTGCAAACGAAAAATTTCTTAT  
CACAGCCCCACCTTTCACAAGCAACCATGCATTGCTCATGAGACCCACTT--

TGAACGATTGCTAATGCCTTCATACAGGAAGCCGCCGAGCTCGGTAAGGGTTCCTTCAAGTACG  
CCTGGGTTCTTGACAAGCTCAAGGCCGAGCGTGAGCGTGGTATCACCATCGATATCGCTCTCTG  
GAAGTTCGAGACCAACGAGTACAATGTCACCGTCATTGGTTAGTACCCCTCCACCTATGCCATG  
TGCTGCTCCATAAGACACTTGACTAACCTTGCTTCATAGACGCTCCCGGTCACCGTGATTTTCATC  
AAGAACATGCTGCCTTCTGGTATGTAATCTGTCTGCCTCGACACGGCCTCAATACGACGTTTTTC  
GTGCCTGCACGACGGCCCCGATCAG-

TGAATTAGGTCAAGATACAGGGAACATGACGCTAATAGGTCAATTTATAGGCAAACCATCTCTGG  
CGAGCACGGTCTCGACAGCAATGGAGTGTATGTAATTTCAATTCCTCCTGCTTCTGTTGAG  
CTTGTAGGCTGAC-

TCGATGGCCATTTAGCTACAACGGTACCTCCGAGCTCCAGCTCGAGCGTATGAGCGTCTACTTC  
AACGAGGCTTCGGGCAACAAGTACGTTTCTCGTGCCGTCCTCGTCGATCTCGAGCCCGGTACCA  
TGGATGCCGTCCGCGCCGGTCCCTTCGGCCAGCTCTTCCGCC????????????????????  
??????????????

>AH9

CATTATAGAGTTTTCTAAACTCCCAACCCATGTGAACTTACCTTTTGTTCCTCGGCAGAAGTTAT  
AGGTCTTCTTATAGCTGCTGCCGGTGGACCATTAAACTCTTGTTATTTTATGTAATCTGAGCGTCT  
TATTTTAATAAGTCAAAACTTTCAACAACGGATCTCTTGTTCTGGCATCGATGAAGAACGCAGC  
GAAATGCGATAAGTAATGTGAATTGCAGAATTCAGTGAATCATCGAATCTTTGAACGCACATTG  
CGCCATTAGTATTCTAGTGGGCATGCCTGTTTCGAGCGTCATTTCAACCCCTAAGCCTAGCTTAG  
TGTTGGGAATCTACTTCTCTTAGGAGTTGTAGTTCCTGAAATACAACGGCGGATTTGTAGTATCC  
TCTGAGCGTAGTAA-

TTTTTTTCTCGCTTTTGTAGGTGCTATAACTCCCAGCCGCTAAACCCCAATTTTTTGTGGTTGAC  
CTCGGATCAGGTAGAAGGTTAGTCATCTACTGATTCCCTTCAT-----

CATTCTCCTTACACTTCATGCCATGATTTTCAACCTACATGTTGAAAATTA-  
TTTTCGCTCCTTCCACAC--TTTT--

TCGCTGGTTACCCCGCCGCGAGGCACCCGCACGACCCCGCGGTGCAAACGAAAAATTTCTTAT  
CACAGCCCCACCTTGCATAAGCAACCATGCATTGCTCATGGGATCCACTT--  
TGAATAATCGCTAATGCCTTCATACAGGAAGCCGCCGAGCTCGGTAAGGGTTCCTTCAAGTACG  
CCTGGGTTCTTGACAAGCTCAAGGCCGAGCGTGAGCGTGGTATCACCATCGATATCGCTCTCTG  
GAAGTTCGAGACCAACGAGTACAATGTCACCGTCATTGGTTAGTACCCCTCCACCTATGCCATG

TGCTGCTCCATAAGACACTTGACTAACCTTGCTTTATAGACGCTCCCGGTCACCGT????????????  
???TGCTGCCTTCTGGTATGTAATCTGTCTGCCTCGACACGGCCTTAATACGACGTTTTTCGTGCC  
TGCACGACGGCCCCGATCAG-  
TGAATTAGGTCAAGATACAGGGAACATGATGCTAATAGGTCATTTATAGGCAAACCATCTCTGG  
CGAGCACGGTCTCGACAGCAATGGAGTGTATGTACTATTTTCAATTCCTCCTGCTTCCTGTTGAG  
CTTGTAGGCTGAC-  
TCGATGGCCATTTAGCTACAACGGTACCTCCGAGCTCCAGCTCGAGCGTATGAGCGTCTACTTC  
AACGAGGCTTCCGGCAACAAGTACGTTCCCTCGTGCCGTCCTCGTCGATCTCGAGCCCCGGTACCA  
TGGATGCCGTCCGCGCCGGTCCCTTCGGCCAGCTCTTCGCCCTGACAACCTC????????????????  
????????????????

>AH9\_1

CATTATAGAGTTTTCTAAACTCCCAACCCATGTGAACCTTACCTTTTGTTGCCTCGGCAGAAGTTAT  
AGGCTTCTTATAGCTGCTGCCGGTGGACCATTAACCTTGTATTATTTATGTAATCTGAGCGTCT  
TATTTTAATAAGTCAAACTTTCAACAACGGATCTCTTGTTCTGGCATCGATGAAGAACGCAGC  
GAAATGCGATAAGTAATGTGAATTGCAGAATTCAGTGAATCATCGAATCTTTGAACGCACATTG  
CGCCATTAGTATTCTAGTGGGCATGCCTGTTTCGAGCGTCATTTCAACCCTTAAGCCTAGCTTAG  
TGTTGGGAATCTACTTCTCTTAGGAGTTGTAGTTCCTGAAATACAACGGCGGATTTGTAGTATCC  
TCTGAGCGTAGTAA-

TTTTTTCTCGTTTTGTTAGGTGCTATAACTCCCAGCCGCTAAACCCCAATTTTTGTGGTTGAC  
CTCGGATCAGGTAGAAGGTTAGTCATCTACTGATTCCCTTCAT-----

CATTCTCCTTCACACTTCATGCCATGATTTTCAACCTACATGTTGAAAATTA-

TTTTCGCTCCTTCCACAC--TTTT--

TCGCTGGTTACCCCGCCGCGAGGCACCCGCACGACCCCGCGGTGCAAACGAAAAATTTCTTAT  
CACAGCCCCACCTTGCATAAGCAACCATGCATTGCTCATGGGATCCACTT--

TGAATAATCGCTAATGCCTTCATACAGGAAGCCGCCGAGCTCGGTAAGGGTTCCTTCAAGTACG  
CCTGGGTTCTTGACAAGCTCAAGGCCGAGCGTGAGCGTGGTATCACCATCGATATCGCTCTCTG  
GAAGTTCGAGACCAACGAGTACAATGTCACCGTCATTGGTTAGTACCCCTCCACCTATGCCATG  
TGCTGCTCCATAAGACACTTGACTAACCTTGCTTTATAGACGCTCCCGGTCACCGT????????????  
???TGCTGCCTTCTGGTATGTAATCTGTCTGCCTCGACACGGCCTTAATACGACGTTTTTCGTGCC  
TGCACGACGGCCCCGATCAG-

TGAATTAGGTCAAGATACAGGGAACATGATGCTAATAGGTCATTTATAGGCAAACCATCTCTGG  
CGAGCACGGTCTCGACAGCAATGGAGTGTATGTACTATTTTCAATTCCTCCTGCTTCCTGTTGAG  
CTTGTAGGCTGAC-

TCGATGGCCATTTAGCTACAACGGTACCTCCGAGCTCCAGCTCGAGCGTATGAGCGTCTACTTC  
AACGAGGCTTCCGGCAACAAGTACGTTCCCTCGTGCCGTCCTCGTCGATCTCGAGCCCCGGTACCA  
TGGATGCCGTCCGCGCCGGTCCCTTCGGCCAGCTCTTCGCCCTGACAACCTC????????????????  
????????????????

>BB1

????????????????????????CCCAACCCATGTGAACCTTACCTTTTGTTGCCTCGGCAGAAGTTATAGGTC  
TTCTTATAGCTGCTGCCGGTGGACCATTAACCTTGTATTATTTATGTAATCTGAGCGTCTTATTTT  
AATAAGTCAAACTTTCAACAACGGATCTCTTGTTCTGGCATCGATGAAGAACGCAGCGAAAT  
GCGATAAGTAATGTGAATTGCAGAATTCAGTGAATCATCGAATCTTTGAACGCACATTGCGCCC  
ATTAGTATTCTAGTGGGCATGCCTGTTTCGAGCGTCATTTCAACCCTTAAGCCTAGCTTAGTGTTG  
GGAATCTACTTCTCTTAGGAGTTGTAGTTCCTGAAATACAACGGCGGATTTGTAGTATCCTCTGA

GCGTAGTAA-  
TTTTTTTCTCGCTTTTGTAGGTGCTATAACTCCCAGCCGCTAAACCCCCAATTTTTTGTGGTTGAC  
CTCGGATCAGGTAGAAGGTTAGTCATCTGTTGATTCTATCAT-----CATTCCCTTCAC-  
ATCAGCGTCATGATTTTCAACCTACGTGTTGAAAATTA-TTTTCGCTCCTTCCACAC--TTTTT--  
TCGCTGGTTACCCCGCCGCGAGGCACCCGCACGACCCCGCGGTGCAAACGAAAAATTTCTTAT  
CACAGCCCCACCTTGCACAAGCAACCATGCATTGCTCATGAGACCCACTT--  
TGAACAATTGCTAATGCCTTCATACAGGAAGCCGCCGAGCTTGGTAAGGGTTCCTTCAAGTACG  
CCTGGGTTCTTGACAAGCTCAAGGCCGAGCGTGAGCGTGGTATCACCATCGATATCGCTCTCTG  
GAAGTTCGAGACCAACGAGTACAATGTCACCGTCATTGGTTAGTACCCCTCCACCAATGCCATA  
TGCTGCTCCATAAGACACTTGACTAACCTTACTTCATAGACGCTCCCGGTCACCGTGATTTTCATC  
AAGAACATGCTGCCTTCTGGTATGTAATCTGTCTGCCTCGACACGGCCTCAATACGACGTTTTTC  
GTGCCTGCACGACGGCCCCGATCAG-  
TGAATTAGGTCAAGATACAGGGAACATGACGCTAATAGGTCAATTTATAGGCAAACCATCTCTGG  
CGAGCACGGTCTCGACAGCAATGGAGTGTATGTACTATTTTCAATTCCTCCTGCTTCTGTTGAG  
CTTGTAGGCTGAC-  
TCGATGGCCATTTAGCTACAACGGTACCTCCGAGCTCCAGCTCGAGCGTATGAGCGTCTACTTC  
AACGAGGCTTCCGGCAACAAGTACGTTCCCTCGTGCCGTCCTCGTCGATCTCGAGCCCGGTACCA  
TGGATGCCGTCCGCGCCGGTCCCTTCGGCCAGCTCTCCGCCCTGACAACCTTCGTCTTCGG?????  
????????????????????

>CL1\_2

???????AGTTTTCTAAACTCCCAACCCATGTGAACCTTACCTTTTGTGCCTCGGCAGAAGTTATAG  
GTCTTCTTATAGCTGCTGCCGGTGGACCATTAACTCTTGTATTTTATGTAATCTGAGCGTCTTA  
TTTTAATAAGTCAAACTTTCAACAACGGATCTCTTGGTTCTGGCATCGATGAAGAACGCAGCGA  
AATGCGATAAGTAATGTGAATTGCAGAATTCAGTGAATCATCGAATCTTGAACGCACATTGCG  
CCCATTAGTATTCTAGTGGGCATGCCTGTTTCGAGCGTCATTTCAACCCTTAAGCCTAGCTTAGTG  
TTGGGAATCTACTTCTCTTAGGAGTTGTAGTTCCTGAAATACAACGGCGGATTTGTAGTATCCTC  
TGAGCGTAGTAA-  
TTTTTTTCTCGCTTTTGTAGGTGCTATAACTCCCAGCCGCTAAACCCCCAATTTTTTGTGGTTGAC  
CTCGGATCAGGTAGAAGGTTAGTCATCTGTTGATTCTATCAT-----CATTCCCTTCAC-  
ATCAGCGTCATGATTTTCAACCTACGTGTTGAAAATTA-TTTTCGCTCCTTCCACAC--TTTTT--  
TCGCTGGTTACCCCGCCGCGAGGCACCCGCACGACCCCGCGGTGCAAACGAAAAATTTCTTAT  
CACAGCCCCACCTTGCACAAGCAACCATGCATTGCTCATGAGACCCACTT--  
TGAACAATTGCTAATGCCTTCATACAGGAAGCTGCCGAGCTCGGTAAGGGTTCCTTCAAGTACG  
CCTGGGTTCTTGACAAGCTCAAGGCCGAGCGTGAGCGTGGTATCACCATCGATATCGCTCTCTG  
GAAGTTCGAGACCAACGAGTACAATGTCACCGTCATTGGTTAGTACCCCTCCACCAATGCCATA  
TGCTGCTCCATAAGACACTTGACTAACCTTACTTCATAGACGCTCCCGGTCACCGTGATTTTCATC  
AAGAACATGCTGCCTTCTGGTATGTAATCTGTCTGCCTCGACACGGCCTCAATACGACGTTTTTC  
GTGCCTGCACGACGGCCCCGATCAG-  
TGAATTAGGTCAAGATACAGGGAACATGACGCTAATAGGTCAATTTATAGGCAAACCATCTCTGG  
CGAGCACGGTCTCGACAGCAATGGAGTGTATGTACTATTTTCAATTCCTCCTGCTTCTGTTGAG  
CTTGTAGGCTGAC-  
TCGATGGCCATTTAGCTACAACGGTACCTCCGAGCTCCAGCTCGAGCGTATGAGCGTCTACTTC  
AACGAGGCTTCCGGCAACAAGTACGTTCCCTCGTGCCGTCCTCGTCGATCTCGAGCCCGGTACCA  
TGGATGCCGTCCGCGCCGGTCCCTTCGGCCAGCTCTCCGCC????????????????????

????????????

>CL5\_1

??TTATAGAGTTTTCTAAACTCCCAACCCATGTGAACTTACCTTTTGTGCCTCGGCAGAAGTTAT  
AGGTCTTCTTATAGCTGCTGCCGGTGGACCATTAAACTCTTGTTATTTTATGTAATCTGAGCGTCT  
TATTTTAATAAGTCAAAACTTTCAACAACGGATCTCTTGTTCTGGCATCGATGAAGAACGCAGC  
GAAATGCGATAAGTAATGTGAATTGCAGAATTCAGTGAATCATCGAATCTTTGAACGCACATTG  
CGCCATTAGTATTCTAGTGGGCATGCCTGTTTCGAGCGTCATTTCAACCCTTAAGCCTAGCTTAG  
TGTTGGGAATCTACTTCTCTTAGGAGTTGTAGTTCCTGAAATACAACGGCGGATTTGTAGTATCC  
TCTGAGCGTAGTAA-  
TTTTTTTCTCGCTTTTGTAGGTGCTATAACTCCCAGCCGCTAAACCCCAATTTTTTGTGGTTGAC  
CTCGGATCAGGTAGAAGGTTAGTCATCTATTGATTCCCATCAT-----CATTTCCCTTCAC-  
TTCAGTGTTATAATTTTCAACCTACGTGTTGAAAATTA-TTTTCGCTCCTTCCACAC--TTTT--  
TCGCTGGTTACCCCGCCGCGAGGCACCCGCACGACCCCGCGGTGCAAACGAAAAATTTCTTAT  
CACAGCCCCACCTTGCACAAGCAATCATGCATTGCTCATGAGACCCACTT--  
TGAACAATTGCTAATGCCTTCATACAGGAAGCCGCCGAGCTCGGTAAGGGTTCCTTCAAGTACG  
CCTGGGTTCTTGACAAGCTCAAGGCCGAGCGTGAGCGTGGTATCACCATCGATATCGCTCTCTG  
GAAGTTCGAGACCAACGAGTACAATGTCACCGTCATTGGTTAGTACCCCTCCACCTATGCCATG  
TGCTGCTCCATAAGACACTTGACTAACCTTGCTTCATAGACGCTCCCGGTCACCGTGATTTTCATC  
AAGA??TGCTGCCTTCTGGTATGTTACCTGTCTGCCTCGACACGGCCTTACTACGACGTTTTTCG  
TGCCTGCACGACGGCCCCGAACAG-  
TGAAATAGGTCAAGATAGAGGGAACATGATACTAATAGGTCAATTTATAGGCAAACCATCTCTGG  
CGAGCACGGTCTCGACAGCAATGGAGTGTATGTAATAACTTCAATTCCTCCTGCTTCTGTTGAG  
TTGTAGGCTGAC-  
TCGATGGCCATTTAGCTACAACGGTACCTCCGAGCTCCAGCTCGAGCGTATGAGCGTCTACTTC  
AACGAGGCTTCCGGCAACAAGTACGTTCCCTCGTGCCGTCCTCGTCGATCTCGAGCCCGGTACCA  
TGGATGCCGTCCGCGCCGGTCCCTTCGGCCAGCT????????????????????????????????  
??????????

>CL5\_1\_1

????????AGTTTTCTAAACTCCCAACCCATGTGAACTTACCTTTTGTGCCTCGGCAGAAGTTATAG  
GTCTTCTTATAGCTGCTGCCGGTGGACCATTAAACTCTTGTTATTTTATGTAATCTGAGCGTCTTA  
TTTTAATAAGTCAAAACTTTCAACAACGGATCTCTTGTTCTGGCATCGATGAAGAACGCAGCGA  
AATGCGATAAGTAATGTGAATTGCAGAATTCAGTGAATCATCGAATCTTTGAACGCACATTGCG  
CCCATTAGTATTCTAGTGGGCATGCCTGTTTCGAGCGTCATTTCAACCCTTAAGCCTAGCTTAGTG  
TTGGGAATCTACTTCTCTTAGGAGTTGTAGTTCCTGAAATACAACGGCGGATTTGTAGTATCCTC  
TGAGCGTAGTAA-  
TTTTTTTCTCGCTTTTGTAGGTGCTATAACTCCCAGCCGCTAAACCCCAATTTTTTGTGGTTGAC  
CTCGGATCAGGTAGAAGGTTAGTCATCTATTGATTCCCATCAT-----CATTTCCCTTCAC-  
TTCAGTGTTATAATTTTCAACCTACGTGTTGAAAATTA-TTTTCGCTCCTTCCACAC--TTTT--  
TCGCTGGTTACCCCGCCGCGAGGCACCCGCACGACCCCGCGGTGCAAACGAAAAATTTCTTAT  
CACAGCCCCACCTTGCACAAGCAATCATGCATTGCTCATGAGACCCACTT--  
TGAACAATTGCTAATGCCTTCATACAGGAAGCCGCCGAGCTCGGTAAGGGTTCCTTCAAGTACG  
CCTGGGTTCTTGACAAGCTCAAGGCCGAGCGTGAGCGTGGTATCACCATCGATATCGCTCTCTG  
GAAGTTCGAGACCAACGAGTACAATGTCACCGTCATTGGTTAGTACCCCTCCACCTATGCCATG  
TGCTGCTCCATAAGACACTTGACTAACCTTGCTTCATAGACGCTCCCGGTCACCGTGATTTTCATC

AAGAA??TGCTGCCTTCTGGTATGTTACCTGTCTGCCTCGACACGGCCTTACTACGACGTTTTTCG  
TGCCTGCACGACGGCCCCGAACAG-  
TGAAATAGGTCAAGATAGAGGGAACATGATACTAATAGGTCAATTTATAGGCAAACCATCTCTGG  
CGAGCACGGTCTCGACAGCAATGGAGTGTATGTACTAACTTCAATTCCTCCTGCTTCTGTTGAG  
TTTGTAGGCTGAC-  
TCGATGGCCATTTAGCTACAACGGTACCTCCGAGCTCCAGCTCGAGCGTATGAGCGTCTACTTC  
AACGAGGCTTCCGGCAACAAGTACGTTCCCTCGTGCCGTCCTCGTATCTCGAGCCCGGTACCA  
TGGATGCCGTCCGCGCCGGTCCCTTCGGCCAGCT????????????????????????????????  
??????????

>CR20

???ATAGAGTTTTCTAAACTCCCAACCCATGTGAACCTTACCTTTTGTTCCTCGGCAGAAGTTATA  
GGTCTTCTTATAGCTGCTGCCGGTGGACCATTAACTCTTGTATTTTATGTAATCTGAGCGTCTT  
ATTTTAATAAGTCAAACTTTCAACAACGGATCTCTTGGTTCTGGCATCGATGAAGAACGCAGCG  
AAATGCGATAAGTAATGTGAATTGCAGAATTCAGTGAATCATCGAATCTTGAACGCACATTGC  
GCCATTAGTATTCTAGTGGGCATGCCTGTTGAGCGTCATTTCAACCCTTAAGCCTAGCTTAGT  
GTTGGGAATCTACTTCTTTA--  
TAGTTGTAGTTCCTGAAATACAACGGCGGATTTGTAGTATCCTCTGAGCGTAGTAA-  
TTTTTTTCTCGCTTTTGTAGGTGCTATAACTCCCAGCCGCTAAACCCCAATTTTTTGTGGTTGAC  
CTCGGATCAGGTAGAAGGTTAGTCATTTATTGATTCCCATCAT-----CATCCCCCTTAC-  
TTCAGCATCATAATTTCAACCTACATGTTGAAAATTA-TTTCGCTCCTTCCACAC--TTTT--  
TCGCTGGTTACCCCGCCGCGAGGCACCCGCACGCCCGCGGTGCAAACGAAAAATTTCTTAT  
CACAGCCCCACCTTGCACAAGCAACCATGCATTGCTCATGAGACCCACTTTGTGAACAATTGCT  
AATGCCTTCATACAGGAAGCCGCGAGCTCGGTAAGGGTTCCTTCAAGTACGCCTGGGTTCTTG  
ACAAGCTCAAGGCCGAGCGTGAGCGTGGTATCACCATCGATATCGCTCTCTGGAAGTTGAGA  
CCAACGAGTACAATGTCACCGTCATTGGTTAGTACCACTCCACCTATGCCATGTGCTGCTCCATA  
AGACACTTGACTAACCTGCTTCACAGACGCTCCCGGTCACCGTGATTTTCATCAAGAACATGCT  
GCCTTCTGGTATGTAATCTGTCTGCCTCGACACGGCCTAATACGACGTTTTTTCGTGCCTGCACG  
ACGGCCCCGATCAG-  
TGAATTAGGTCAAGATACAGGGAACATGATGCTAATAGGTCAATTTATAGGCAAACCATCTCTGG  
CGAGCACGGTCTCGACAGCAATGGAGTGTATGTACTATTTTCAATTCCTCCTGCTTCTGTTGAG  
CTTGTAGGCTGAC-  
TCGATGGCCATTTAGCTACAACGGTACCTCCGAGCTCCAGCTCGAGCGTATGAGCGTCTACTTC  
AACGAGGCTTCCGGCAACAAGTACGTTCCCTCGTGCCGTCCTCGTATCTCGAGCCCGGTACCA  
TGGATGCCGTCCGCGCCGGTCCCTTCGGCCAGCT????????????????????????????????  
??????????

>E2

CATTATAGAGTTTTCTAAACTCCCAACCCATGTGAACCTTACCTTTTGTTCCTCGGCAGAAGTTAT  
AGGTCTTCTTATAGCTGCTGCCGGTGGACCATTAACTCTTGTATTTTATGTAATCTGAGCGTCT  
TATTTTAATAAGTCAAACTTTCAACAACGGATCTCTTGGTTCTGGCATCGATGAAGAACGCAGC  
GAAATGCGATAAGTAATGTGAATTGCAGAATTCAGTGAATCATCGAATCTTGAACGCACATTG  
CGCCATTAGTATTCTAGTGGGCATGCCTGTTGAGCGTCATTTCAACCCTTAAGCCTAGCTTAG  
TGTTGGGAATCTACTTCTCCTAGGAGTTGTAGTTCCTGAAATACAACGGCGGATTTGTAGTATCC  
TCTGAGCGTAGTAA-  
TTTTTTTCTCGCTTTTGTAGGTGCTATAACTCCCAGCCGCTAAACCCCAATTTTTTGTGGTTGAC

CTCGGATCAGGT????????????????GATTCCCATCAT-----CATCCCCCTTCAC-  
TTCAGCATCATAATTTTCAACCTACATGTTGAAAATTA-TTTTCGCTCCTTCCACAC--TTTTT--  
TCGCTGGTTACCCCGCCGCGAGGCACCCGCACGACCCCGCGGTGCAAACGAAAAATTTCTTAT  
CACAGCCCCACCTTGCACAAGCAACCATGCATTGCTCATGAGACCCACTTTGTGAACAATTGCT  
AATGCCTTCATACAGGAAGCCGCGAGCTCGGTAAGGGTTCCTTCAAGTACGCCTGGGTTCTTG  
ACAAGCTCAAGGCCGAGCGTGAGCGTGGTATCACCATCGATATCGCTCTCTGGAAGTTCGAGA  
CCAACGAGTACAATGTCACCGTCATTGGTTAGTACCACTCCACCTATGCCATGTGCTGCTCCATA  
AGACACTTGACTAACCTGCTTACAGACGCTCCCGGTCACCGTGATTTTCATCAAGAACATGCT  
GCCTTCTGGTATGTAATCTGTCTGCCTCGACACGGCCTTGATACGACGTTTTTCGTGCCTGCACG  
ACGGCCCCGATCAG-  
TGAATTAGGTCAAGATACAGGGAACATGATGCTAATAGGTCAATTTATAGGCAAACCATCTCTGG  
CGAGCACGGTCTCGACAGCAATGGAGTGTATGTAATTTTCAATTCCTCCTGCTTCCTGTTGAG  
CTTGTAGGCTGAC-  
TCGATGGCCATTTAGCTACAACGGTACCTCCGAGCTCCAGCTCGAGCGTATGAGCGTCTACTTC  
AACGAGGCTTCCGGCAACAAGTACGTTCCCTCGTGCCGTCCTCGTCGATCTCGAGCCCGGTACCA  
TGGATGCCGTCCGCGCCGGTCCCTTCGGCCAGCTC????????????????????????????  
????????????

>JK15\_2

????TAGAGTTTTCTAAACTCCCAACCCATGTGAACCTTACCTTTTGTTCCTCGGCAGAAGTTATA  
GGTCTTCTTATAGCTGCTGCCGGTGGACCATAAACTCTTGTATTTTATGTAATCTGAGCGTCTT  
ATTTTAATAAGTCAAACCTTTCAACAACGGATCTCTTGGTTCTGGCATCGATGAAGAACGCAGCG  
AAATGCGATAAGTAATGTGAATTGCAGAATTCAGTGAATCATCGAATCTTTGAACGCACATTGC  
GCCATTAGTATTCTAGTGGGCATGCCTGTTGAGCGTCATTTCAACCCTAAGCCTAGCTTAGT  
GTTGGGAATCTACTTCTTAGGAGTTGTAGTTCCTGAAATACAACGGCGGATTTGTAGTATCCT  
CTGAGCGTAGTAA-  
TTTTTTTCTCGTTTTGTTAGGTGCTATAACTCCCAGCCGCTAAACCCCAATTTTTTGTGGTTGAC  
CTCGGATCAGG?AGAAGGTTAGTCATCTGTTGATTCCATCAT-----CATTCCCTTCAC-  
ATCAGCGTCATGATTTTCAACCTACGTGTTGAAAATTA-TTTTCGCTCCTTCCACAC--TTTTT--  
TCGCTGGTTACCCCGCCGCGAGGCACCCGCACGACCCCGCGGTGCAAACGAAAAATTTCTTAT  
CACAGCCCCACCTTGCACAAGCAACCATGCATTGCTCATGAGACCCACTT--  
TGAACAATTGCTAATGCCTTCATACAGGAAGCTGCCGAGCTCGGTAAGGGTTCCTTCAAGTACG  
CCTGGGTTCTTGACAAGCTCAAGGCCGAGCGTGAGCGTGGTATCACCATCGATATCGCTCTCTG  
GAAGTTCGAGACCAACGAGTACAATGTCACCGTCATTGGTTAGTACCCCTCCACCAATGCCATA  
TGCTGCTCCATAAGACACTTGACTAACCTTACTTCATAGACGCTCCCGGTCACCGTGATTTTCATC  
AAGAACATGCTGCCTTCTGGTATGTAATCTGTCTGCCTCGACACGGCCTCAATACGACGTTTTTC  
GTGCCTGCACGACGGCCCCGATCAG-  
TGAATTAGGTCAAGATACAGGGAACATGACGCTAATAGGTCAATTTATAGGCAAACCATCTCTGG  
CGAGCACGGTCTCGACAGCAATGGAGTGTATGTAATTTTCAATTCCTCCTGCTTCCTGTTGAG  
CTTGTAGGCTGAC-  
TCGATGGCCATTTAGCTACAACGGTACCTCCGAGCTCCAGCTCGAGCGTATGAGCGTCTACTTC  
AACGAGGCTTCCGGCAACAAGTACGTTCCCTCGTGCCGTCCTCGTCGATCTCGAGCCCGGTACCA  
TGGATGCCGTCCGCGCCGGTCCCTTCGGCCAGCTC????????????????????????????  
????????????

>L8

??TTATAGAGTTTTCTAAACTCCCAACCCATGTGAACTTACCTTTTGTGCCTCGGCAGAAGTTAT  
AGGATTTCTTATAGCCGCTGCCGGTGGACCATCAAACCTTGTATTTTATGTAATCTGAGCGTCT  
TATTTAATAAGTCAAACCTTTCAACAACGGATCTCTTGGTTCTGGCATCGATGAAGAACGCAGC  
GAAATGCGATAAGTAATGTGAATTGCAGAATTCAGTGAATCATCGAATCTTTGAACGCACATTG  
CGCCATTAGTATTCTAGTGGGCATGCCTGTTTCGAGCGTCATTTCAACCCTTAAGCCCAGCTTAG  
TGTTGGGAATCTACTTCTTCA--  
CAGTCGTAGTTCCTGAAATACAACGGCGGATTGATAGCATCCTCTGAGCGTAGTAA-  
TTTTTTTCTCGCTTTTGTGAGGTGCTGTGACTCCCAGCCGCTAAACCCCAATTTTTTGTGGTTGA  
CCTCGGATCAGGT????????????????????????????????CATCAC-----  
AAATTTCAACCTACGTGTTGAAAATTA-  
TTTTCGCTCCTTCCACACTTTTTTTCCCGCTGGCTACCCCGCCGCGAGGCACCCGCACGACCCC  
GCGGTGCAAACGAAAAATTTCTTATCATAGCCCCACCTTGCATAAGCAACCATGCATTACTCAT  
GAGATCCAATT--  
TGAATAATTGCTAATGCCTTCATACAGGAAGCCGCCGAGCTCGGTAAGGGTTCCTTCAAGTACG  
CCTGGGTTCTTGACAAGCTCAAGGCCGAGCGTGAGCGTGGTATCACCATCGATATCGCTCTCTG  
GAAGTTCGAGACCAACGAGTACAATGTCACCGTCATTGGTTAGTACCTCTCCACCTATGCCATG  
TGCTGCACCATAAGGCACTTCACTAACCT-----  
GCTCAC????????????????????????????????TGCTGCCTTCTGGTATGTAACCTGTCTGCCTCGACACGGCC  
TTGATACGACGTTTTTCGTGCCTGCACGACGGCCTCGAACAG-  
TGAAGTCAAGACAGAGGGAACATAATGCTAATAGGTCATTTATAGGCAAACCATCTCTGG  
CGAGCACGGTCTCGACAGCAATGGAGTGTATGTACCATTTTCAATT-----  
CTTCCTGTTGAGCTTGTAGGCTGAC-  
TCGATGGCCATTTAGCTACAACGGTACCTCCGAGCTCCAGCTCGAGCGTATGAGCGTCTACTTC  
AACGAGGCTTCCGGCAACAAGTACGTTTCTCGTGCCGTCCTCGTGCATCTCGAGCCCGGTACCA  
TGGATGCCGTCGCGCCGGTCCCTTCGGCCAGCTTTCGGCCCTGACAACCTTCGTCTTCGGTCA  
GTCCGGTGCTGGCAACAACCTGG

>L8\_1

????????????CTAAACTCCCAACCCATGTGAACTTACCTTTTGTGCCTCGGCAGAAGTTATAGG  
ATTTCTTATAGCCGCTGCCGGTGGACCATCAAACCTTGTATTTTATGTAATCTGAGCGTCTTAT  
TTTAATAAGTCAAACCTTTCAACAACGGATCTCTTGGTTCTGGCATCGATGAAGAACGCAGCGA  
AATGCGATAAGTAATGTGAATTGCAGAATTCAGTGAATCATCGAATCTTTGAACGCACATTGCG  
CCCATTAGTATTCTAGTGGGCATGCCTGTTTCGAGCGTCATTTCAACCCTTAAGCCCAGCTTAGTG  
TTGGGAATCTACTTCTTCA--  
CAGTCGTAGTTCCTGAAATACAACGGCGGATTGATAGCATCCTCTGAGCGTAGTAA-  
TTTTTTTCTCGCTTTTGTGAGGTGCTGTGACTCCCAGCCGCTAAACCCCAATTTTTTGTGGTTGA  
CCTCGGATCAGGT????????????????????????????????????????????????????????  
????????????????????????????????????????????????????????????????????  
????????????????????????????????????????????????????????????????????  
CCGCTGGCTACCCCGCCGCGAGGCACCCGCACGACCCCGCGGTGCAAACGAAAAATTTCTTAT  
CATAGCCCCACCTTGCATAAGCAACCATGCATTACTCATGAGATCCAATT--  
TGAATAATTGCTAATGCCTTCATACAGGAAGCCGCCGAGCTCGGTAAGGGTTCCTTCAAGTACG  
CCTGGGTTCTTGACAAGCTCAAGGCCGAGCGTGAGCGTGGTATCACCATCGATATCGCTCTCTG  
GAAGTTCGAGACCAACGAGTACAATGTCACCGTCATTGGTTAGTACCTCTCCACCTATGCCATG  
TGCTGCACCATAAGGCAC????????????????????????????????????????????????????  
TTCTGGTATGTAACCTGTCTGCCTCGACACGGCCTTGATACGACGTTTTTCGTGCCTGCACGACG

GCCTCGAACAG-  
TGAAGTCAAGACAGAGGGAACATAATGCTAATAGGTCATTTATAGGCAAACCATCTCTGG  
CGAGCACGGTCTCGACAGCAATGGAGTGTATGTACCATTTTCAATT-----  
CTTCCTGTTGAGCTTGTAGGCTGAC-  
TCGATGGCCATTTAGCTACAACGGTACCTCCGAGCTCCAGCTCGAGCGTATGAGCGTCTACTTC  
AACGAGGCTTCCGGCAACAAGTACGTTCCCTCGTGCCGTCCTCGTCGATCTCGAGCCCGGTACCA  
TGGATGCCGTCCGCGCCGGTCCCTTCGGCCAGCTCTTCGCCCTGACAACCTTCGTCTTCGGTCA  
GTCCGGTGCTGGCAACAACCTGG

>HN89\_1

CATTATAGAGTTTTCTAAACTCCCAACCCATGTGAACCTTACCTTTTGTTCCTCGGCAGAAGTTAT  
AGGATTTCTTATAGCCGCTGCCGGTGGACCATCAAACCTTTGTTATTTTATGTAATCTGAGCGTCT  
TATTTTAATAAGTCAAACTTTCAACAACGGATCTCTTGGTTCTGGCATCGATGAAGAACGCAGC  
GAAATGCGATAAGTAATGTGAATTGCAGAATTCAGTGAATCATCGAATCTTTGAACGCACATTG  
CGCCATTAGTATTCTAGTGGGCATGCCTGTTTCGAGCGTCATTTCAACCCTTAAGCCTAGCTTAG  
TGTTGGGAATCTACTTCTTCT--  
CAGTCGTAGTTCCTGAAATACAACGGCGGATTTATAGCATCCTCTGAGCGTAGTAA-  
TTTTTTTCTCGTTTTGTGAGGTGCTGTGACTCCAGCCGCTAAACCCCAATTTTTTGTGG-  
TGACCTC-GATCAG-T????????????????????????CATCAT-----CATTACCCTCC-  
CCTTCAGCATCACAATTTCAACCTACGTGTTGAAAAATA-TTTTCGCTCCTTCCCCTT--TTTTT-  
TCCCGTGGCTACCCCGCCGCGAGGC-  
CCCGCACGACCCCGCGGTGCAAACGAAAAATTTCTTATCATAGCCCCACCTTGATAAGCAACC  
ATGCATTAATCATGAGATCCACTT--  
TGAATAATTGCTAATGCCTTCATACAGGAAGCCGCGGAGCTCGGTAAGGGTTCCTTCAAGTACG  
CCTGGGTTCTTGACAAGCTCAAGGCCGAGCGTGAGCGTGGTATCACCATCGATATCGCTCTC-  
GGAAGTTCGAGACCAACGAGTACAATGTCACCGTC-  
TTGGTTAGTACCTCTCCACCTATGCCATGTGCTGCACCACAAGGCACTTCACTAACCTTGCT-  
CACAGATGCTACC-----  
TCCCCAA????TGCTGCCTTCTGGTATGTAACCTGTCTGCCTCGACACGGCCTTAATACGACGTTT  
TTCGTGCCTGCACGACGGCCTCGAACAG-  
TGAAGTCAAGACAGAGGGAACATAATACTAATAGGTCATTTATAGGCAAACCATCTCTGG  
CGAGCACGGTCTCGACAGCAATGGAGTGTATGTACCATTTTCAATT-----  
CTTCCTGTTGAGCTTGTAGGCTGAC-  
TCGATGGCCATTTAGCTACAACGGTACCTCCGAGCTCCAGCTCGAGCGTATGAGCGTCTACTTC  
AACGAGGCTTCCGGCAACAAGTACGTTCCCTCGTGCCGTCCTCGTCGATCTCGAGCCCGGTACCA  
TGGATGCCGTCCGCGCCGGTCCCTTCGGCCAGCTCTTCGCCCTGACAACCTTCGTCTC-  
TCGGTCAGTCC-GTGC--GCAACAA-TGG

>LD1

???????AGTTTTCTAAACTCCCAACCCATGTGAACCTTACCTTTTGTTCCTCGGCAGAAGTTATAG  
GTCTTCTTATAGCTGCTGCCGGTGGACCATTAACCTTCTGTTATTTTATGTAATCTGAGCGTCTTA  
TTTTAATAAGTCAAACTTTCAACAACGGATCTCTTGGTTCTGGCATCGATGAAGAACGCAGCGA  
AATGCGATAAGTAATGTGAATTGCAGAATTCAGTGAATCATCGAATCTTTGAACGCACATTGCG  
CCCATTAGTATTCTAGTGGGCATGCCTGTTTCGAGCGTCATTTCAACCCTTAAGCCTAGCTTAGTG  
TTGGGAATCTACTTCTTCTTAGGAGTTGTAGTTCCTGAAATACAACGGCGGATTTGTAGTATCCTC  
TGAGCGTAGTAA-



TTTTTTTCTCGCTTTTGTAGGTGCTATAACTCCCAGCCGCTAAACCCCCAATTTTTTGTGGTTGAC  
CTCGGATCAGGT?????????????????GATTCCCATCAT-----CATCCCCCTTCAC-  
TTCAGCATCATAATTTCAACCTACATGTTGAAAATTA-TTTCGCTCCTTCCACAC--TTTT--  
TCGCTGGTTACCCCGCCGCGAGGCACCCGCACGACCCCGCGGTGCAAACGAAAAATTTCTTAT  
CACAGCCCCACCTTGCACAAGCAACCATGCATTGCTCATGAGACCCACTTTGTGAACAATTGCT  
AATGCCTTCATACAGGAAGCCGCGAGCTCGGTAAGGGTTCCTTCAAGTACGCCTGGGTTCTTG  
ACAAGCTCAAGGCCGAGCGTGAGCGTGGTATCACCATCGATATCGCTCTCTGGAAGTTGAGA  
CCAACGAGTACAATGTCACCGTCATTGGTTAGTACCACTCCACCTATGCCATGTGCTGCTCCATA  
AGACACTTGACTAACCTGCTTCACAGA????????????????????????????????TGCTGCCTTCTGGT  
ATGTTACCTGTCTGCCTCGACACGGCCTTACTACGACGTTTTTCGTGCCTGCACGACGGCCCCG  
AACAG-  
TGAAATAGGTCAAGATAGAGGGAACATGATACTAATAGGTCAATTTATAGGCAAACCATCTCTGG  
CGAGCACGGTCTCGACAGCAATGGAGTGTATGTAATACTTCAATTCCTCCTGCTTCTGTTGAG  
TTTGTAGGCTGAC-  
TCGATGGCCATTTAGCTACAACGGTACCTCCGAGCTCCAGCTCGAGCGTATGAGCGTCTACTTC  
AACGAGGCTTCCGGCAACAAGTACGTTCCCTCGTGCCGTCCTCGTCGATCTCGAGCCCCGGTACCA  
TGGATGCCGTCCGCGCCGGTCCCTTCGGCCAGCTCTTCGCCCTGACAACCTTCGTCTTCGGTCA  
GTCCGGTGCTGGCAACAACCTGG

>ML3

?????????????????????????CCAACCCATGTGAACTTACCTTTTGTGCTCGGCAGAAGTTATAGGTC  
TTCTTATAGCTGCTGCCGGTGGACCATTAACCTCTTGTATTTTATGTAATCTGAGCGTCTTATTTT  
AATAAGTCAAACCTTTCAACAACGGATCTCTTGGTCTGGCATCGATGAAGAACGCAGCGAAAT  
GCGATAAGTAATGTGAATTGCAGAATTCAGTGAATCATCGAATCTTTGAACGCACATTGCGCCC  
ATTAGTATTCTAGTGGGCATGCCTGTTGAGCGTCATTTCAACCCTTAAGCCTAGCTTAGTGTG  
GGAATCTACTTCTTAGGAGTTGTAGTTCCTGAAATACAACGGCGGATTTGTAGTATCCTCTGA  
GCGTAGTAA-

TTTTTTTCTCGCTTTTGTAGGTGCTATAACTCCCAGCCGCTAAACCCCCAATTTTTTGTGGTTGAC  
CTCGGATCAGGT?????????????????????ATCAT-----CATCCCCCTTGAC-  
TTCAGCATCATAATTTCAACCTACGTGTTGAAAATTA-TTTCGCTCCTTCCACAC--TTTT--  
TCGCTGGTTACCCCGCCGCGAGGCACCCGCACGACCCCGCGGTGCAAACGAAAAATTTCTTAT  
CACAGCCCCACCTTGCACAAGCAACCATGCATTGCTCATGAGACCCACTT--  
TGAACAATTGCTAATGCCTTCATACAGGAAGCCGCGAGCTCGGTAAGGGTTCCTTCAAGTACG  
CCTGGGTTCTTGACAAGCTCAAGGCCGAGCGTGAGCGTGGTATCACCATCGATATCGCTCTCTG  
GAAGTTCGAGACCAACGAGTACAATGTCACCGTCATTGGTTAGTACCCCTCCGCCTATGCCATG  
TGCTGCTCCATAAGACACTTGACTAACCTTGCTTCATAGACGCTCCCGGTCA?????????????????  
??TGCTGCCTTCTGGTATGTAATCTGTCTGCCTCGACACGGCCTTAATACGACGTTTTTCGTGCCT  
GCACGACGGCCCCGATCAG-  
TGAATTAGGTCAAGATACAGGGAACATGATGCTAATAGGTCAATTTATAGGCAAACCATCTCTGG  
CGAGCACGGTCTCGACAGCAATGGAGTGTATGTAATACTTCAATTCCTCCTGCTTCTGTTGAG  
CTTGTAGGCTGAC-  
TCGATGGCCATTTAGCTACAACGGTACCTCCGAGCTCCAGCTCGAGCGTATGAGCGTCTACTTC  
AACGAGGCTTCCGGCAACAAGTACGTTCCCTCGTGCCGTCCTCGTCGATCTCGAGCCCCGGTACC?  
????????????????????????????????????????????????????????????????????  
????????????????????????????????????????????????????????????????????

>N\_alpapicalis\_MFLUCC\_17\_2544

CATTATAGAGTTTTCTAAACTCCCAACCCATGTGAACTTACC-  
TTTGTTCCTCGGCAGAAGTTATAGGTCTTCTTATAGCTGCTGCCGGTGGACCATTAACCTCTG  
TTATTTTATGTAATCTGAGCGTCTATTTTAATAAGTCAAAACTTTCAACAACGGATCTCTGGTTC  
TGGCATCGATGAAGAACGCAGCGAAATGCGATAAGTAATGTGAATTGCAGAATTCAGTGAATC  
ATCGAATCTTTGAACGCACATTGCGCCCATTAGTATTCTAGTGGGCATGCCTGTTGAGCGTCAT  
TTCAACCCTTAAGCCTAGCTTAGTGTGGGAATCTACTTCTTTA--  
TAGTTGTAGTTCCTGAAATACAACGGCGGATTTGTAGTATCCTCTGAGCGTAGTAA-  
TTTTTTTCTCGCTTTTGTAGGTGCTATAACTCCCAGCCGCTAAACCCCAATTTTTTGTGGTTGAC  
CTCGGATCAGGT????????????????????CATCAT-----CCCCCTTCAC-TTCAGCAT--  
-AATTTTCAACCTACGTGTTGAAAATTA-TTTTCGCTCCTTCCACAC--TTTTT--  
TCGCTGGTTACCCCGCCGCGAGGCACCCGCACGACCCCGCGGTGCAAACGAAAAATTTCTTAT  
CACAGCCCCACCTTGCACAAGCAACCATGCATTGCTCATGAGACCCACTT--  
TGAACAATTGCTAATGCCTTCATACAGGAAGCCGCCGAGCTCGGTAAGGGTTCCTTCAAGTACG  
CCTGGGTTCTTGACAAGCTCAAGGCCGAGCGTGAGCGTGGTATCACCATCGATATCGCTCTCTG  
GAAGTTCGAGACCAACGAGTACAATGTCACCGTCATTGGTTAGTACTCCTCCACCTATGCCATG  
TGCTGCACCATGAGACACTTGAATAACCTTGCTTCATAGACGCTCCCGGTCACCGTGATTTTCATC  
AAGAACATGCTGCTTTCTGGTATGTAATCTGTCTGCCTCGACACGGCCTTAATACGACGTTTTTC  
GTGCCTGCACGACGGCCCCGATCAG-

>N\_aotearoa\_CBS\_367\_54

CATTATAGAGTTTTCTAAACTCCCAACCCATGTGAACTTACCTTTTGTTCCTCGGCAGGAGTTAT  
AGGTCTTCTTATAGCTGCTGCCGGTGGACCATTAACCTCTTGTATTTTATGTAATCTGAGCGTCT  
TATTTTAATAAGTCAAAACTTTCAACAACGGATCTCTTGGTTCTGGCATCGATGAAGAACGCAGC  
GAAATGCGATAAGTAATGTGAATTGCAGAATTCAGTGAATCATCGAATCTTTGAACGCACATTG  
CGCCATTAGTATTCTAGTGGGCATGCCTGTTGAGCGTCATTTCAACCCTTAAGCCTAGCTTAG  
TGTTGGGAATCTACTTCTTTA--  
TAGTTGTAGTTCCTGAAATACAACGGCGGATTTGTAGTATCCTCTGAGCGTAGTAA-  
TTTTTTTCTCGCTTTTGTAGGTGCTATAACTCCCAGCCGCTAAACCCCAATTTTTTGTGGTTGAC  
CTCGGATCAGGTAGAAGGTTAGTCATTTATTGATTCCCATCAT-----CATCCCCCTTCAC-  
TTCAGCATCATAATTTTCAACCTACGTGTTGAAAATTA-TTTTCGCTCCTTCCACAC--TTTTT--  
TCGCTGGTTACCCCGCCGCGAGGCACCCGCACGACCCCGCGGTGCAAACGAAAAATTTCTTAT  
CACAGCCCCACCTTGCACAAGCAACCATGCATTGCTCATGAGACCCACTT--  
TGAACAATTGCTAATGCCTTCATACAGGAAGCCGCCGAGCTCGGTAAGGGTTCCTTCAAGTACG  
CCTGGGTTCTTGACAAGCTCAAGGCCGAGCGTGAGCGTGGTATCACCATCGATATCGCTCTCTG  
GAAGTTCGAGACCAACGAGTACAATGTCACCGTCATTGGTTAGTACCCCTCCACCTATGCCATG  
TGCTGCTCCATAAGACACTTGAATAACCTTGCTTCATAGACGCTCCCGGTCACCGTGATTTTCATC  
AAGAACATGCTGCTTTCTGGTATGTAATCTGTCTGCCTCGACACGGCCTTAATACGACGTTTTTC  
GTGCCTGCACGACGGCCCCGATCAG-

TGAATTAGGTCAAGATACAGGGAACATGATGCTAATAGGTCATTTATAGGCAAACCATCTCTGG  
CGAGCACGGTCTCGACAGCAATGGAGTGTATGTACTATTTTCAATTCCTCCTGCTTCCTGTTGAG  
CTTGTAGGCTGAC-

TCGATGGCCATTTAGCTACAACGGTACCTCCGAGCTCCAGCTCGAGCGTATGAGCGTCTACTTC  
AACGAGGCTTCCGGCAACAAGTACGTTCCCTCGTGCCGTCCTCGTATCTCGAGCCCGGTACCA  
TGGATGCCGTCCGCGCCGGTCCCTTCGGCCAGCTCTTCGCCCTGACAACCTTCGTCTTCGGTCA  
GTCCGGTGCTGGCAACAACCTGG

>N\_asiatica\_MFLUCC\_12\_0286

CATTATAGAGTTTTCTAAACTCCCAACCCATGTGAACTTACCTTTTGTTCCTCGGCAGAAGTTAT  
AGGTCTTCTTATAGCTGCTGCCGGTGGACCATTAACTCTTGTTATTTTATGTAATCTGAGCGTCT  
TATTTTAATAAGTCAAACTTTCAACAACGGATCTCTTGTTCTGGCATCGATGAAGAACGCAGC  
GAAATGCGATAAGTAATGTGAATTGCAGAATTCAGTGAATCATCGAATCTTTGAACGCACATTG  
CGCCATTAGTATTCTAGTGGGCATGCCTGTTTCGAGCGTCATTTCAACCCCTAAGCCTAGCTTAG  
TGTTGGGAATCTACTTCTTTA--

TAGTTGTAGTTCCTGAAATACAACGGCGGATTTGTAGTATCCTCTGAGCGTAGTAA-  
TTTTTTCTCGTTTTGTTAGGTGCTATAACTCCCAGCCGCTAAACCCCAATTTTTTGTGGTTGAC  
CTCGGATCAGGTAGAAGGTTAGTCATCTACTGATTCCCTTCAT-----

CATTCTCCTTCACACTTCATGCCATGATTTTCAACCTACGTGTTGAAAATTA-  
TTTTCGCTCCTTCCACAC--TTTT--

TCGCTGGTTACCCCGCCGCGAGGCACCCGCACGACCCCGCGGTGCAAACGAAAAATTTCTTAT  
CACAGCCCCACCTTGCATAAGCAACCATGCATTGCTCATGGGATCCACTT--

TGAATAATCGCTAATGCCTTCATACAGGAAGCCGCGAGCTCGGTAAGGGTTCCTTCAAGTACG  
CCTGGGTTCTTGACAAGCTCAAGGCCGAGCGTGAGCGTGGTATCACCATCGATATCGCTCTCTG  
GAAGTTCGAGACCAACGAGTACAATGTCACCGTCATTGGTTAGTACCCCTCCACCTATGCCATG  
TGCTGCTCCATAAGACACTTGACTAACCTTGCTTTATAGACGCTCCCGGTCACCGTGATTTTCATC  
AAGAACATGCTGCTTTCTGGTATGTTACCTGTCTGCCTCGACACGGCCTTAATACGACGTTTTTC  
GTGCCTGCACGACGGCCCCGAACAG-

TGAAATAGGTCAAGATAGAGGGAACATAATACTAATAGGTCATTTATAGGCAAACCATCTCTGG  
CGAGCACGGTCTCGACAGCAATGGAGTGTATGTACTAACTTCAATTCCTCCTGCTTCCTGTTGAG  
CTTGTAGGCTGAC-

TCGATGGCCATTTAGCTACAACGGTACCTCCGAGCTCCAGCTCGAGCGTATGAGCGTCTACTTC  
AACGAGGCTTCCGGCAACAAGTACGTTCCCTCGTGCCGTCCTCGTATCTCGAGCCCGGTACCA  
TGGATGCCGTCCGCGCCGGTCCCTTCGGCCAGCTCTTCGCCCTGACAACCTTCGTCTTCGGTCA  
GTCCGGTGCTGGCAACAACCTGG

>N\_australis\_CBS\_114159

CATTATAGAGTTTTCTAAACTCCCAACCCATGTGAACTTACCTTTTGTTCCTCGGCAGAAGTTAT  
AGGTCTTCTTATAGCTGCTGCCGGTGGACCATTAACTCTTGTTATTTTATGTAATCTGAGCGTCT  
TATTTTAATAAGTCAAACTTTCAACAACGGATCTCTTGTTCTGGCATCGATGAAGAACGCAGC  
GAAATGCGATAAGTAATGTGAATTGCAGAATTCAGTGAATCATCGAATCTTTGAACGCACATTG  
CGCCATTAGTATTCTAGTGGGCATGCCTGTTTCGAGCGTCATTTCAACCCCTAAGCCTAGCTTAG  
TGTTGGGAATCTACTTCTTTTATTAGTTGTAGTTCCTGAAATACAACGGCGGATTTGTAGTATCCT  
CTGAGCGTAGTAA-

TTTTTTCTCGTTTTGTTAGGTGCTACAACCTCCCAGCCGCTAAACCCCAATTTTTTGTGGTTGA  
CCTCGGATCAGGTGAAGGTTAGTCATCTACTGATTCCCGTCAT-----CATTCTCCTTCAC-

TTCAGCGTCATGATTTTCAACCTACGTGTTGAAAATTA-TTTTCGCTCCTTCCACAC--TTTTT--  
TCGCTGGTTACCCCGCCGCGAGGCACCCAGCACGACCCCGCGGTGCAAACGAAAAATTTCTTAT  
CACAGCCCCACCTTGCATAAGCAACCATGCATTGCTCATGAGATCCACTT--  
TGAACAATTGCTAATGCCTTCATACAGGAAGCCGCCGAGCTCGGTAAGGGTTCCTTCAAGTACG  
CCTGGGTTCTTGACAAGCTCAAGGCCGAGCGTGAGCGTGGTATCACCATCGATATCGCTCTCTG  
GAAGTTCGAGACCAACGAGTACAATGTCACCGTCATTGGTTAGTACCCCTCCACCTATGCCATG  
TGCTGCTCCATAAGACACTTGACTAACCTTGCTTCATAGACGCTCCCGGTACCCGTGATTTTCATC  
AAGAACATGCTGCCTTCTGGTATGTAACCTGTCTGCCTCGACACGGCCTTAATACGACGTTTTTC  
GTGCCTGCACGACGGCCCCGAACAG-  
TGAATTAGGTCAAGATAGAGGGAACATGATGCTAATAGGTCAATTGATAGGCAAACCATCTCTGG  
CGAGCACGGTCTCGACAGCAATGGAGTGTATGTAATAATTTTAAATCCTCCTGCTTCTGTTAAG  
CTTGTAGGCTGAC-  
TCGATGGCCATTTAGCTACAACGGTACCTCCGAGCTCCAGCTCGAGCGTATGAGCGTCTACTTC  
AACGAGGCTTCCGGCAACAAGTACGTTCCCTCGTGCCGTCCTCGTCGATCTCGAGCCCGGTACCA  
TGGATGCCGTCCGCGCCGGTCCCTTCGGCCAGCTCTCCGCCCTGACAACCTTCGTCTTCGGTCA  
GTCCGGTGCTGGCAACAACCT??  
>N\_brachiata\_MFLUCC\_17\_1555  
CATTATAGAGTTTTCTAAACTCCCAACCCATGTGAACTTACCTTTTGTTCCTCGGCAGAAGTTAT  
AGGTCTTCTTATAGCTGCTGCCGGTGGACCATTAACTCTTGTATTTTATGTAATCTGAGCGTCT  
TATTTTAATAAGTCAAACTTTCAACAACGGATCTCTTGGTTCTGGCATCGATGAAGAACGCAGC  
GAAATGCGATAAGTAATGTGAATTGCAGAATTCAGTGAATCATCGAATCTTTGAACGCACATTG  
CGCCATTAGTATTCTAGTGGGCATGCCTGTTTCGAGCGTCATTTCAACCCCTAAGCCTAGCTTAG  
TGTTGGGAATCTACTTCTTTA--  
TAGTTGTAGTTCCTGAAATACAACGGCGGATTTGTAGTATCCTCTGAGCGTAGTAA-  
TTTTTTTCTCGCTTTTGTAGGTGCTATAACTCCAGCCGCTAAACCCCAATTTTTTGTGGTTGAC  
CTCGGATCAGGT?????TtagtcatTTATTGATCCCATCAT-----CATCCCCCTTAC-  
TTCAGCATCATAAATTTCAACCTACGTGTTGAAAATTA-TTTTCGCTCCTTCCACAC--TTTTT--  
TCGCTGGTTACCCCGCCGCGAGGCACCCGCACGACCCCGCGGTGCAAACGAAAAATTTCTTAT  
CACAGCCCCACCTTGCACAAGCAACCATGCATTGCTCATGAGACCCACTT--  
TGAACAATTGCTAATGCCTTCATACAGGAAGCCGCCGAGCTCGGTAAGGGTTCCTTCAAGTACG  
CCTGGGTTCTTGACAAGCTCAAGGCCGAGCGTGAGCGTGGTATCACCATCGATATCGCTCTCTG  
GAAGTTCGAGACCAACGAGTACAATGTCACCGTCATTGGTTAGTACCCCTCCACCTATGCCATG  
TGCTGCTCCATAAGACACTTGACTAACCTTGCTTCATAGACGCTCCCGGTACCCGTGATTTTCATC  
AAG????TGCTGCCTTCTGGTATGTAATCTGTCTGCCTCGACACGGCCTTAATACGACGTTTTTCGT  
GCCTGCACGACGGCCCCGATCAG-  
TGAATTAGGTCAAGATACAGGGAACATGATGCTAATAGGTCAATTTATAGGCAAACCATCTCTGG  
CGAGCACGGTCTCGACAGCAATGGAGTGTATGTAATAATTTTCAATCCTCCTGCTTCTGTTGAG  
CTTGTAGGCTGAC-  
TCGATGGCCATTTAGCTACAACGGTACCTCCGAGCTCCAGCTCGAGCGTATGAGCGTCTACTTC  
AACGAGGCTTCCGGCAACAAGTACGTTCCCTCGTGCCGTCCTCGTCGATCTCGAGCCCGGTACCA  
TGGATGCCGTCCGCGCCGGTCCCTTCGGCCAGCTCTCCGCCCTGACAACCTTCGTCTTCGGTCA  
GTCCGGTGCTGGCAACAACCTGG

>N\_brasiliensis\_COAD\_2166  
CATTATAGAGTTTTCTAAACTCCCAACCCATGTGAACTTACCTTTTGTTCCTCGGCAGAAGTTAT

AGGTCTTCTTATAGCTGCTGCCGGTGGACCATTAAACTCTTGTTATTTTATGTAATCTGAGCGTCT  
TATTTTAATAAGTCAAAACTTTCAACAACGGATCTCTTGGTTCTGGCATCGATGAAGAACGCAGC  
GAAATGCGATAAGTAATGTGAATTGCAGAATTCAGTGAATCATCGAATCTTTGAACGCACATTG  
CGCCATTAGTATTCTAGTGGGCATGCCTGTTGAGCGTCATTTCAACCCTTAAGCCTAGCTTAG  
TGTTGGGAATCTACTTCTCTTAGGAGTTGTAGTTCCTGAAATACAACGGCGGATTTGTAGTATCC  
TCTGAGCGTAGTAA-

TTTTTTTCTCGCTTTTGTAGGTGCTATAACTCCCAGCCGC????????????????????????????  
???AGAAGGTTAGCCATCTACTGATTTCCGTCAT-----TATTCTCCTTCAC-

TTCAGCGTGATGATTTTCAACCTACGTGTTGAAAATTA-TTTTCGCTCCTTCCACAC--TTTT--  
TCGCTGGTTACCCCGCCGCGAGGCACCCGCACGACCCCGCGGTGCAAGCGAAAAATTTCTTAT

CACAGCCCCACCTTGCATAAGCAACCATGCATTGCTCATGAGATCCACTT--  
TGAACAATTGCTAATGCTTTTACATACAGGAAGCCGCCGAGCTCGGTAAGGGTTCCTTCAAGTACG

CCTGGGTTCTTGACAAGCTCAAGGCCGAGCGTGAGCGTGGTATCACCATCGATATCGCTCTCTG  
GAAGTTCGAGACCAACGAGTACAATGTCACCGTCATTGGTTAGTACCCCTCCACCTATGTCATG

TGCTGCTCCATAAGACACTTGACTAACCTTGCTTCATAGACGCTCCCGGTCACCGTGATTTTCATC  
AAGAATGCTGCCTTCTGGTATGTTACCTGTCTGCCTCGACACGGCCTTACTACGACGTTTTTC

GTGCCTGCACGACGGCCCCGAACAG-  
TGAATAGGTCAAGATAGAGGGAACATGATACTAATAGGTCAATTTATAGGCAAACCATCTCTGG

CGAGCACGGTCTCGACAGCAATGGAGTGTATGTACTAACTTCAATTCCTCCTGCTTCTGTTGAG  
TTTGTAGGCTGAC-

TCGATGGCCATTTAGCTACAACGGTACCTCCGAGCTCCAGCTCGAGCGTATGAGCGTCTACTTC  
AACGAGGCTTCCGGCAACAAGTACGTTCCCTCGTGCCGTCCTCGTTCGATCTCGAGCCCGGTACCA

TGGATGCCGTCCGCGCCGGTCCCTTCGGCCAGCTCTTCCGCCCTGACAACCTTCGCTTCCGGTCA  
GTCCGGTGCTGGCA???????

>N\_camelliae\_oleiferaeCSUFTCC81

????????????????????????????????????????????????????????????????  
????????????????????????????????????????????????????????????????  
CCACCCATGTG-

ACTTACCTTTTGTGCTCGGCAGAAGTTATAGGTCTTCTTATAGCTGCTGCCGGTGGACCATTA  
AACTCTTGTTATTTTATGTAATCTGAGCGTCTTATTTTAATAAGTCAAAACTTTCAACAACGGATC

TCTTGGTTCTGGCATCGATGAAGAACGCAGCGAAATGCGATAAGTAATGTGAATTGCAGAATTC  
AGTGAATCATCGAATCTTTGAACGCACATTGCGCCATTAGTATTCTAGTGGGCATGCCTGTTG

AGCGTCATTTCAACCCTTAAGCCTAGCTTAGTGTGGGAATCTACTTCTTTTATTAGTTGTAGTTC  
CTGAAATACAACGGCGGATTTGTAGTATCCTCTGAGCGTAGTAA-

TTTTTTTCTCGCTTTTGTAGGTGCTATAACTCCCAGCCGCTAAACCCCAATTTTTTGTGGTTGAC  
CTC????????????????????????????????????????????????????????????  
TTCCCATAT-----CATTTCCCTTCAC-

TGCAGCGTCATCATTTTCAATCTACGTGTTGAAAATTA-TTTTCGCTCCTTCCACAC--TTTT--  
TCGCTGGTTACCCCGCCGCGAGGCACCCGCACGACCCCGCGGTGCAAACGAAAAATTTCTTAT

CACAGCCCCACCTTGCACAAGCAACAATGCATTGCTCATGAGACCCACTT--  
TGAACAATTGCTAATGCCTTCATATAGGAAGCCGCCGAGCTCGGTAAGGGTTCCTTCAAGTACG

CCTGGGTTCTTGACAAGCTCAAGGCCGAGCGTGAGCGTGGTATCACCATCGATATCGCTCTCTG  
GAAGTTCGAGACCAACGAGTACAATGTCACCGTCATTGGTTAGTACCCCTCCACCTATGCC---

TGCCGCTCCATAAGGCACCTTGACTAACTTTGCTTCATAGACGCTCCCGGTCACCGTGATTTCA???  
??????TGCTGCCTTCTGGTATGTAACCTGTCTGCCTCGACACGGCCTTGATACGACGTTTTTCGTG

CCTGCACGACGGCCCCGAACAG-  
TGAATTAGGTCAAGATAGAGGGAACATGATGCTAATAGGTCAATGATAGGCAAACCATCTCTGG

CGAGCACGGTCTCGACAGCAATGGAGTGTATGTA TACTATTTTCAATTCCTCCTGCTTCCTGTTGAG  
CTTGTAGGCTGAC-

TCGATGGCCATTTAGCTACAACGGTACCTCCGAGCTCCAGCTCGAGCGTATGAGCGTCTACTTC  
AACGAGGCTTCCGTAACAAGTACGTTCCCTCGTGCCGTCCTCGTCGATCTCGAGCCCGGTACCA  
TGGATGCCGTCCGCGCCGGTCCCTTCGGCCAGCTCTTCGCCCTGACAA????????????????  
????????????????

>N\_camelliae\_oleiferaeCSUFTCC82

????????????????????????????????CCCACCCATGTG-

ACTTACCTTTTGTTCCTCGGCAGAAAGTTATAGGTCTTCTTATAGCTGCTGCCGGTGGACCATTA  
AACTCTTGTTATTTTATGTAATCTGAGCGTCTTATTTTAATAAGTCAAACTTTCAACAACGGATC  
TCTTGTTCTGGCATCGATGAAGAACGCAGCGAAATGCGATAAGTAATGTGAATTGCAGAATTC  
AGTGAATCATCGAATCTTTGAACGCACATTGCGCCCATTAGTATTCTAGTGGGCATGCCTGTTTCG  
AGCGTCATTTCAACCCTTAAGCCTAGCTTAGTGTGGGAATCTACTTCTTTTATTAGTTGTAGTTC  
CTGAAATACAACGGCGGATTTGTAGTATCCTCTGAGCGTAGTAA-

TTTTTTTCTCGCTTTTGTAGGTGCTATAACTCCCAGCCGCTAAACCCCAATTTTTTGTGGTTGAC  
CTC????????????????????????????????????????????????????????????TTCCCATAT-----CATTTCCCTTCAC-

TGCAGCGTCATCATTTTCAATCTACGTGTTGAAAATTA-TTTCGCTCCTTCCACAC--TTTT--

TCGCTGGTTACCCCGCCGCGAGGCACCCGCACGACCCCGCGGTGCAAACGAAAAATTTCTTAT  
CACAGCCCCACCTTGCACAAGCAACAATGCATTGCTCATGAGACCCACT--

TGAACAATTGCTAATGCCTTCATATAGGAAGCCGCGAGCTCGGTAAGGGTTCCTTCAAGTACG  
CCTGGGTTCTTGACAAGCTCAAGGCCGAGCGTGAGCGTGGTATCACCATCGATATCGCTCTCTG  
GAAGTTCGAGACCAACGAGTACAATGTCACCGTCATTGGTTAGTACCCCTCCACCTATGCC---

TGCCGCTCCATAAGGCACTTGACTAACTTTGCTTCATAGACGCTCCCGGTACCCGTGATTTCA??  
?????TGCTGCCTTCTGGTATGTAACCTGTCTGCCTCGACACGGCCTTGATACGACGTTTTTCGTG  
CCTGCACGACGGCCCCGAACAG-

TGAATTAGGTCAAGATAGAGGGAACATGATGCTAATAGGTCAATTGATAGGCAAACCATCTCTGG  
CGAGCACGGTCTCGACAGCAATGGAGTGTATGTA TACTATTTTCAATTCCTCCTGCTTCCTGTTGAG  
CTTGTAGGCTGAC-

TCGATGGCCATTTAGCTACAACGGTACCTCCGAGCTCCAGCTCGAGCGTATGAGCGTCTACTTC  
AACGAGGCTTCCGTAACAAGTACGTTCCCTCGTGCCGTCCTCGTCGATCTCGAGCCCGGTACCA  
TGGATGCCGTCCGCGCCGGTCCCTTCGGCCAGCTCTTCGCCCTGACAA????????????????  
????????????????

>N\_cavernicola\_KUMCC\_20\_0269

CATTATAGAGTTTTCTAAACTCCCAACCCATGTGAACCTTACCTTTTGTTCCTCGGCAGAAAGTTAT  
AGGTCTTCTTATAGCTGCTGCCGGTGGACCATTAACTCTTGTTATTTTATGTAATCTGAGCGTCT  
TATTTTAATAAGTCAAACTTTCAACAACGGATCTCTTGGTTCTGGCATCGATGAAGAACGCAGC  
GAAATGCGATAAGTAATGTGAATTGCAGAATTCAGTGAATCATCGAATCTTTGAACGCACATTG  
CGCCATTAGTATTCTAGTGGGCATGCCTGTTTCGAGCGTCATTTCAACCCTTAAGCCTAGCTTAG  
TGTTGGGAATCTACTTCTCTTAGGAGTTGTAGTTCCTGAAATACAACGGCGGATTTGTAGTATCC  
TCTGAGCGTAGTAA-

TTTTTTTCTCGCTTTTGTAGGTGCTATAACTCCCAGCCGCTAAACCCCAATTTTTTGTGGTTGAC  
CTCGGATCAGGT????????????????????????????????????????????????????????????TTTCA  
ACCTACGTGTTGAAAATTA-TCTTCGCTCCTTCCACAC--TTTT--

TCGCTGGTTACCCCGCCGCGAGGCACCCGCACGACCCCGCGGTGCAAACGAAAAATTTCTTAT







AACGAGGCTTCCGGCAACAAGTACGTTCCCTCGTGCCGTCCTCGTCGATCTCGAGCCCGGTACCA  
TGGATGCCGTCCGCGCCGGTCCCTTCGGCCAGCTCTTCGCCCTGACAACCTTCGTCTTCGGTCA  
GTCCGGTGCTGGCAACAACCTGG

>N\_clavispora\_MFLUCC\_12\_0281

CATTATAGAGTTTTCTAAACTCCCAACCCATGTGAACCTTACCTTTTGTTCCTCGGCAGAAGTTAT  
AGGTCTTCTTATAGCTGCTGCCGGTGGACCATTAACTCTTGTTATTTTATGTAATCTGAGCGTCT  
TATTTTAATAAGTCAAACTTTCAACAACGGATCTCTTGTTCTGGCATCGATGAAGAACGCAGC  
GAAATGCGATAAGTAATGTGAATTGCAGAATTCAGTGAATCATCGAATCTTTGAACGCACATTG  
CGCCATTAGTATTCTAGTGGGCATGCCTGTTTCGAGCGTCATTTCAACCCTTAAGCCTAGCTTAG  
TGTTGGGAATCTACTTCTCTTAGGAGTTGTAGTTCCTGAAATACAACGGCGGATTTGTAGTATCC  
TCTGAGCGTAGTAA-

TTTTTTTCTCGCTTTTGTAGGTGCTATAACTCCCAGCCGCTAAACCCCAATTTTTTGTGGTTGAC  
CTCGGATCAGGTAGAAGGTTAGTCATCTATTGATTCCCATCAT-----CATTTCCCTTAC-  
TTCAGTGTTATAATTTCAACCTACGTGTTGAAAATTA-TTTTCGCTCCTTCCACAC--TTTT--  
TCGCTGGTTACCCCGCCGCGAGGCACCCGCACGACCCCGCGGTGCAAACGAAAAATTTCTTAT  
CACAGCCCCACCTTGCACAAGCAATCATGCATTGCTCATGAGACCCACTT--  
TGAACAATTGCTAATGCCTTCATACAGGAAGCCGCCGAGCTCGGTAAGGGTTCCTTCAAGTACG  
CCTGGGTTCTTGACAAGCTCAAGGCCGAGCGTGAGCGTGGTATCACCATCGATATCGCTCTCTG  
GAAGTTCGAGACCAACGAGTACAATGTCACCGTCATTGGTTAGTACCCCTCCACCTATGCCATG  
TGCTGCTCCATAAGACACTTGACTAACCTTGCTTCATAGACGCTCCCGGTACCCGTGATTTTCATC  
AAGAACATGCTGCTTTCTGGTATGTAATCTGTCTGCCTCGACACGGCCTTAATACGACGTTTTTC  
GTACCTGCACGACGGCCCCGATCAG-

TGAATTAGGTCAAGATACAGGGAACATGATGCTAATAGGTCAATTTATAGGCAAACCATCTCTGG  
CGAGCACGGTCTCGACAGCAATGGAGTGTATGTAATTTTCAATTCCTCCTGCTTCTGTTGAG  
CTTGAGGCTGAC-

TCGATGGCCATTTAGCTACAACGGTACCTCCGAGCTCCAGCTCGAGCGTATGAGCGTCTACTTC  
AACGAGGCTTCCGGCAACAAGTACGTTCCCTCGTGCCGTCCTCGTCGATCTCGAGCCCGGTACCA  
TGGATGCCGTCCGCGCCGGTCCCTTCGGCCAGCTCTTCGCCCTGACAACCTTCGTC-  
TCGGTCAGTCC-GTGCTGGCAACAACCTGG

>N\_cocoes\_MFLUCC\_15\_0152

CATTATAGAGTTTTCTAAACTCCCAACCCATGTGAACCTTACCTTTTGTTCCTCGGCAGAAGTTAT  
AGGTCTTCTTATAGCTGCTGCCGGTGGACCATTAACTCTTGTTATTTTATGTAATCTGAGCGTCT  
TATTTTAATAAGTCAAACTTTCAACAACGGATCTCTTGTTCTGGCATCGATGAAGAACGCAGC  
GAAATGCGATAAGTAATGTGAATTGCAGAATTCAGTGAATCATCGAATCTTTGAACGCACATTG  
CGCCATTAGTATTCTAGTGGGCATGCCTGTTTCGAGCGTCATTTCAACCCTTAAGCCTAGCTTAG  
TGTTGGGAATCTACTTCTCTTAGGAGTTGTAGTTCCTGAAATACAACGGCGGATTTGTAGTATCC  
TCTGAGCGTAGTAA-

TTTTTTTCTCGCTTTTGTAGGTGCTATAACTCCCAGCCGCTAAACCCCAATTTTTTGTGG-  
TGACCTCGGATCAG-T????????????????????ATCATCATCAT-----  
TCCCTTCACTTCAGGCATCATGATTTTCAACCTACGTGTTG-AAATTA-  
TTTTCGCTCCTTCCACAC--TTTT--

TCGCTGGTTACCCCGCCGCGAGGCACCCGCACGACCCCGCGGTGCAAACGAAAAATTTCTTAT  
CACAGCCCCACCTTGCACAAGCAACCATGCATTGCTCATGAGACCCACTT--  
TGAAAAATTGCGAATGCCTTCTTACAGGAAGCCGCCGAGATCGGTAAGGGTTCCTTCAAG?????



TCGCTGGTTACCCCGCCGCGAGGCACCCGCACGACCCCGCGGTGCAAACGAAAAATTTCTTAT  
CACAGCCCCACCTTGCACAAGCAACCATGCATTGCTCATGAGACCCACTT--  
TGAACAATTGCTAATGCCTTCATACAGGAAGCCGCCGAGCTCGGTAAGGGTTCCTTCAAGTACG  
CCTGGGTTCTTGACAAGCTCAAGGCCGAGCGTGAGCGTGGTATCACCATCGATATCGCTCTCTG  
GAAGTTCGAGACCAACGAGTACAATGTCACCGTCATTGGTTAGTACCCCTCCACCTATGCCATG  
TGCTGCTCCATAAGACACTTGACTIONACCTTGCTTCATAGACGCTCCCGGTACCCGTGATTTATC  
AAGAACA????????GAGTTATTA-  
CTGTCTGCCTCGACACGGCCTTAATACGACGTTTTTCGTGCCTGCACGACGGCCCCGAACAGTT  
GAAATAGGTCAAGATAGAGGGAACATAAGACTAATAGGTCAATTTATAGGCAAACCATCTCTGGC  
GAGCACGGTCTCGACAGCAATGGAGTGTATGTACTAACTTCAATTCCTCCTGCTTCTGTTGAGC  
TTGTAGGCTGAC-  
TCGATGGCCATTTAGCTACAACGGTACCTCCGAGCTCCAGCTCGAGCGTATGAGCGTCTACTTC  
AACGAGGCTTCCGGCAACAAGTACGTTCCCTCGTGCTGTCCCTCGTCGATCTCGAGCCCGGTACCA  
TGGATGCCGTCCGCGCCGGTCCCTTCGGCCAGCTCTCCGCCCTGACAACCTTCGTCTTCGGTCA  
GTCCGGTGCTGGCAACAACCTGG

>N\_cubana\_CBS\_600\_96

CATTATAGAGTTTTCTAAACTCCCAACCCATGTGAACCTTACCTTTTGTTCCTCGGCAGAAGTTAT  
AGGTCTTCTTATAGCTGCTGCCGGTGGACCATTAACTCTTGTTATTTTATGTAATCTGAGCGTCT  
TATTTTAATAAGTCAAACTTTCAACAACGGATCTCTTGTTCTGGCATCGATGAAGAACGCAGC  
GAAATGCGATAAGTAATGTGAATTGCAGAATTCAGTGAATCATCGAATCTTTGAACGCACATTG  
CGCCATTAGTATTCTAGTGGGCATGCCTGTTTCGAGCGTCATTTCAACCCTTAAGCCTAGCTTAG  
TGTTGGGAATCTACTTCTCTTAGGAGTTGTAGTTCCTGAAATACAACGGCGGATTTGTAGTATCC  
TCTGAGCGTAGTAA-

TTTTTTTCTCGTTTTGTTAGGTGCTATAACTCCCAGCCGCTAAACCCCCAATTTTTTGTGGTTGAC  
CTCGGATCAGGT???AGGTTAGTCATCTATTGATTCCCATCAT-----CATTCCCCTTCAC-  
TCCAGCGTCATGATTTTCAACCTACGCGTTGAAAATTA-TTTTCGCTCCTTCCACAC--TTTTT--

TCGCTGGTTACCCCGCCGCGAGGCACCCGCACGACCCCGCGGTGCAAACGAAAAATTTCTTAT  
CACAGCCCCACCTTTCACAAGCAACCATGCATTGCTCATGAGACCCACTT--  
TGAACAATTGCTAATGCCTTCATACAGGAAGCCGCCGAGCTCGGTAAGGGTTCCTTCAAGTACG  
CCTGGGTTCTTGACAAGCTCAAGGCCGAGCGTGAGCGTGGTATCACCATCGATATCGCTCTCTG  
GAAGTTCGAGACCAACGAGTACAATGTCACCGTCATTGGTTAGTACCCCTCCACCTATGCCATG  
TGCTGCTCCATAAGACACTTGACTIONACCTTGCTTCATAGACGCTCCCGGTACCCGTGATTTATC  
AAGAACATGCTGCCTTCTGGTATGTAACCTGTCTGTCTCGACACGGCCTCAATACGACGTTTTTC  
GTGCCTGCACGACAGCCCCGAACAG-

TGAATTAGGTCAAGATAGAGGGAACATGATGCTAATAGGTCAATGATAGGCAAACCATCTCTGG  
CGAGCACGGTCTCGACAGCAATGGAGTGTATGTACTATTTTCAATTCCTCCTGCTTCTGTTGAG  
CTTGTAGGCTGAC-

TCGATGGCCATTTAGCTACAACGGTACCTCCGAGCTCCAGCTCGAGCGTATGAGCGTCTACTTC  
AACGAGGCTTCCGGCAACAAGTACGTTCCCTCGTGCCGTCCCTCGTCGATCTCGAGCCCGGTACCA  
TGGATGCCGTCCGCGCCGGTCCCTTCGGCCAGCTCTCCGCCCTGACAACCTTCGTCTTCGGTCA  
GT????????????????

>N\_dendrobii\_MFLUCC\_14\_0106

CATTATAGAGTTTTCTAAACTCCCAACCCATGTGAACCTTACCTTTTGTTCCTCGGCAGAAGTTAT  
AGGTCTTCTTATAGCTGCTGCCGGTGGACCATTAACTCTTGTTATTTTATGTAATCTGAGCGTCT

TATTTAATAAGTCAAACTTTCAACAACGGATCTCTTGGTTCTGGCATCGATGAAGAACGCAGC  
GAAATGCGATAAGTAATGTGAATTGCAGAATTCAGTGAATCATCGAATCTTTGAACGCACATTG  
CGCCATTAGTATTCTAGTGGGCATGCCTGTTTCGAGCGTCATTTCAACCCCTAAGCCTAGCTTAG  
TGTTGGGAATCTACTTCTCTTAGGAGTTGTAGTTCCTGAAATACAACGGCGGATTTGTAGTATCC  
TCTGAGCGTAGTAA-

TTTTTTCTCGCTTTTGTAGGTGCTATAACTCCCAGCCGCTAAACCCCAATTTTTT?????????  
?????????AGAAGTTAGTCATTTATTGATTCCCATCAT-----CATCCCCTTCAC-

TTCAGCATCATAATTTTAACCTACGTGTTGAAAATTA-TTTTCGCTCCTTCCACAC--TTTT--  
TCGCTGGTTACCCCGCCGCGAGGCACCCGCACGACCCCGCGGTGCAAACGAAAAATTTCTTAT  
CACAGCCCCACCTTGCACAAGCAACCATGCATTGCTCATGAGACCCACTT--

TGAACAATTGCTAATGCCTTCATACAGGAAGCCGCCGAGCTCGGTAAGGGTTC?????????  
????????????????????????????????????????????????????????????????  
????????????????????????????????????????????????????????????????  
????????????????????????????????????????????????????????????????

?????????????????TGCTGCTTTCTGGTATGTAACCTGTCTGTCTCGTCACGGCCTCAATACGACGTT  
TTTCGTGCCTGCACGACAGCCCCGAACAG-

TGAATTAGGTCAAGATAGAGGGAACATGATGCTAATAGGTCAATTGATAGGCAAACCATCTCTGG  
CGAGCACGGTCTCGACAGCAATGGAGTGTATGTAATTTCAATTCCTCCTGCTTCTGTTGAG  
CTTGTAGGCTGAC-

TCGATGGCCATTTAGCTACAACGGTACCTCCGAGCTCCAGCTCGAGCGCATGAGTGTCTACTTC  
AACGAGGCTTCCGGCAACAAGTACGTTCCCTCGTGCCGTCCTCGTCGATCTCGAGCCCGGTACCA  
TGGATGCCGTCCGCGCCGGTCCCTTCGGCCAGCTCTTCGCCCTGACAACCTTCGCTTCCGGTCA  
GTCCGGTGCTGGCAACAACCTGG

>N\_drenthii\_BRIP\_72263a

CATTATAGAGTTTCTAAACTCCCAACCCATGTGAACCTTACCTTTTGTTCCTCGGCAGAAGTTAT  
AGGTCTTCTTATAGCTGCTGCCGGTGGACCATTAACTCTTGTATTATTTATGTAATCTGAGCGTCT  
TATTTAATAAGTCAAACTTTCAACAACGGATCTCTTGGTTCTGGCATCGATGAAGAACGCAGC  
GAAATGCGATAAGTAATGTGAATTGCAGAATTCAGTGAATCATCGAATCTTTGAACGCACATTG  
CGCCATTAGTATTCTAGTGGGCATGCCTGTTTCGAGCGTCATTTCAACCCCTAAGCCTAGCTTAG  
TGTTGGGAATCTACTTCTTTA--

TAGTTGTAGTTCCTGAAATACAACGGCGGATTTGTAGTATCCTCTGAGCGTAGTAA-  
TTTTTTCTCGCTTTTGTAGGTGCTATAACTCCCAGCCGCTAAACCCCAATTTTTTGTGGTTGAC  
CTCGGATCAGGTAGAAGGTTAGTCATCTTTTATTCCCATCAT-----CATTCCCCTCCAC-

TTCAGCGTCATGATTTTCAACCTACGTGTTGAAAATTA-TTTTCGCTCCTTCCACAC--TTTCT--  
TCGCTGGTTACCCCGCCGCGAGGCACCCGCACGACCCCGCGGTGCAAACGAAAAATTTCTTAT  
CACAGCCCCACCTTGCACAAGCAACCATGCATTGCTCATGAGACCCACTT--

TGAACAATTGCTAATGCCTTCATACAGGAAGCCGCCGAGCTCGGTAAGGGTTCCTTCAAGTACG  
CCTGGGTTCTTGACAAGCTCAAGGCCGAGCGTGAGCGTGGTATCACCATCGATATCGCTCTCTG  
GAAGTTCGAGACCAACGAGTACAATGTCACCGTCATTGGTTAGTACCCCTCCACCTATGCCATG  
TGCTGCTCCATAAGACACTTGACTAACCTTGCTTCATAGACGCTCCCGGTCACCGTGATTTTCATC  
AAGAACA??????TTCTGGTATGTTACCTGTCTGCCTCGACACGGCCTTACTACGACGTTTTTTCGT  
GCCTGCACGACGGCCCCGAACAG-

TGAAATAGGTCAAGATAGAGGGAACATGATACTAATAGGTCAATTTATAGGCAAACCATCTCTGG  
CGAGCACGGTCTCGACAGCAATGGAGTGTATGTAATTTCAATTCCTCCTGCTTCTGTTGAG  
TTTGTAGGCTGAC-

TCGATGGCCATTTAGCTACAACGGTACCTCCGAGCTCCAGCTCGAGCGCATGAGTGTCTACTTC  
AACGAGGCTTCCGGCAACAAGTACGTTCCCTCGTGCCGTCCTCGTCGATCTCGAGCCCGGTACCA  
TGGATGCCGTCCGCGCCGGTCCCTTCGGCCAGCTCTTCGCCCTGACAACCTTCGCTTCCGGTCA  
GTCCGGTGCTGGCAACAACCTGG

>N\_drenthii\_BRIP\_72263a

CATTATAGAGTTTCTAAACTCCCAACCCATGTGAACCTTACCTTTTGTTCCTCGGCAGAAGTTAT  
AGGTCTTCTTATAGCTGCTGCCGGTGGACCATTAACTCTTGTATTATTTATGTAATCTGAGCGTCT  
TATTTAATAAGTCAAACTTTCAACAACGGATCTCTTGGTTCTGGCATCGATGAAGAACGCAGC  
GAAATGCGATAAGTAATGTGAATTGCAGAATTCAGTGAATCATCGAATCTTTGAACGCACATTG  
CGCCATTAGTATTCTAGTGGGCATGCCTGTTTCGAGCGTCATTTCAACCCCTAAGCCTAGCTTAG  
TGTTGGGAATCTACTTCTTTA--

TAGTTGTAGTTCCTGAAATACAACGGCGGATTTGTAGTATCCTCTGAGCGTAGTAA-  
TTTTTTCTCGCTTTTGTAGGTGCTATAACTCCCAGCCGCTAAACCCCAATTTTTTGTGGTTGAC  
CTCGGATCAGGTAGAAGGTTAGTCATCTTTTATTCCCATCAT-----CATTCCCCTCCAC-

TTCAGCGTCATGATTTTCAACCTACGTGTTGAAAATTA-TTTTCGCTCCTTCCACAC--TTTCT--  
TCGCTGGTTACCCCGCCGCGAGGCACCCGCACGACCCCGCGGTGCAAACGAAAAATTTCTTAT  
CACAGCCCCACCTTGCACAAGCAACCATGCATTGCTCATGAGACCCACTT--

TGAACAATTGCTAATGCCTTCATACAGGAAGCCGCCGAGCTCGGTAAGGGTTCCTTCAAGTACG  
CCTGGGTTCTTGACAAGCTCAAGGCCGAGCGTGAGCGTGGTATCACCATCGATATCGCTCTCTG  
GAAGTTCGAGACCAACGAGTACAATGTCACCGTCATTGGTTAGTACCCCTCCACCTATGCCATG  
TGCTGCTCCATAAGACACTTGACTAACCTTGCTTCATAGACGCTCCCGGTCACCGTGATTTTCATC  
AAGAACA??????TTCTGGTATGTTACCTGTCTGCCTCGACACGGCCTTACTACGACGTTTTTTCGT  
GCCTGCACGACGGCCCCGAACAG-

TGAAATAGGTCAAGATAGAGGGAACATGATACTAATAGGTCAATTTATAGGCAAACCATCTCTGG  
CGAGCACGGTCTCGACAGCAATGGAGTGTATGTAATTTCAATTCCTCCTGCTTCTGTTGAG  
TTTGTAGGCTGAC-

TCGATGGCCATTTAGCTACAACGGTACCTCCGAGCTCCAGCTCGAGCGTATGAGCGTCTACTTC  
AACGAGGCTTCCGGCAACAAGTACGTTCCCTCGTGCCGTCCTCGTATCTCGAGCCCGGTACCA  
TGGATGCCGTCCGCGCCGGTCCCTTCGGCCAGCTCTTCGCCCTGACAACCTTCGTCTTCGGTCA  
GTCCGGTGCTGGCAACAACCTGG

>N\_drenthii\_BRIP\_72264a

CATTATAGAGTTTTCTAAACTCCCAACCCATGTGAACTTACCTTTTGTTGCCTCGGCAGAAGTTAT  
AGGTCTTCTTATAGCTGCTGCCGGTGGACCATTAAACTCTTGTTATTTTATGTAATCTGAGCGTCT  
TATTTTAATAAGTCAAAACTTTCAACAACGGATCTCTTGTTCTGGCATCGATGAAGAACGCAGC  
GAAATGCGATAAGTAATGTGAATTGCAGAATTCAGTGAATCATCGAATCTTTGAACGCACATTG  
CGCCATTAGTATTCTAGTGGGCATGCCTGTTTCGAGCGTCATTTCAACCCCTAAGCCTAGCTTAG  
TGTTGGGAATCTACTTCTTTA--

TAGTTGTAGTTCCTGAAATACAACGGCGGATTTGTAGTATCCTCTGAGCGTAGTAA-

TTTTTTTCTCGCTTTTGTTAGGTGCTATAACTCCCAGCCGCTAAACCCCAATTTTTTGTGGTTGAC  
CTCGGATCAGGTAGAAGGTTAGTCATCTTTTGATTCCCATCAT-----CATTCCCCTCCAC-

TTCAGCGTCATGATTTTCAACCTACGTGTTGAAAATTA-TTTTCGCTCCTTCCACAC--TTTTCT--

TCGCTGGTTACCCCGCCGCGAGGCACCCGCACGACCCCGCGGTGCAAACGAAAAATTTCTTAT  
CACAGCCCCACCTTGCACAAGCAACCATGCATTGCTCATGAGACCCACTT--

TGAACAATTGCTAATGCCTTCATACAGGAAGCCGCCGAGCTCGGTAAGGGTTCCTTCAAGTACG  
CCTGGGTTCTTGACAAGCTCAAGGCCGAGCGTGAGCGTGGTATCACCATCGATATCGCTCTCTG

GAAGTTCGAGACCAACGAGTACAATGTCACCGTCATTGGTTAGTACCCCTCCACCTATGCCATG  
TGCTGCTCCATAAGACACTTGACTAACCTTGCTTCATAGACGCTCCCGGTACCCGTGATTTTCATC

AAGAACA????????TCTGGTATGTTACCTGTCTGCCTCGACACGGCCTTACTACGACGTTTTTCGT  
GCCTGCACGACGGCCCCGAACAG-

TGAAATAGGTCAAGATAGAGGGAACATGATACTAATAGGTCAATTTATAGGCAAACCATCTCTGG  
CGAGCACGGTCTCGACAGCAATGGAGTGTATGTAATACTTCAATTCCTCCTGCTTCTGTTGAG

TTTGTAGGCTGAC-

TCGATGGCCATTTAGCTACAACGGTACCTCCGAGCTCCAGCTCGAGCGTATGAGCGTCTACTTC  
AACGAGGCTTCCGGCAACAAGTACGTTCCCTCGTGCCGTCCTCGTATCTCGAGCCCGGTACCA

TGGATGCCGTCCGCGCCGGTCCCTTCGGCCAGCTCTTCGCCCTGACAACCTTCGTCTTCGGTCA  
GTCCGGTGCTGGCAACAACCTGG

>N\_egyptiaca\_CBS\_140162

CATTATAGAGTTTTCTAAACTCCCAACCCATGTGAACTTACCTTTTGTTGCCTCGGCAGAAGTTAT  
AGGTCTTCTTATAGCTGCTGCCGGTGGACCATTAAACTCTTGTTATTTTATGTAATCTGAGCGTCT  
TATTTTAATAAGTCAAAACTTTCAACAACGGATCTCTTGTTCTGGCATCGATGAAGAACGCAGC  
GAAATGCGATAAGTAATGTGAATTGCAGAATTCAGTGAATCATCGAATCTTTGAACGCACATTG  
CGCCATTAGTATTCTAGTGGGCATGCCTGTTTCGAGCGTCATTTCAACCCCTAAGCCTAGCTTAG  
TGTTGGGAATCTACTTCTTTA--

TAGTTGTAGTTCCTGAAATACAACGGCGGATTTGTAGTATCCTCTGAGCGTAGTAA-

TTTTTTTCTCGCTTTTGTTAGGTGCTATAACTCCCAGCCGCTAAACCCCAATTTTTTGTGGTTGAC  
CTCGGATCAGGTAGAAGGTTAGTCATCTACTGATTCCCGTCAT-----CATTCTCCTTCCAC-

TTCAGCGTCATGATTTTTAACCTACGTGTTGAAAATTA-TTTTCGCTCCTTCCACAC--TTTT--

TCGCTGGTTACCCCGCCGCGAGGCACCCGCACGACCCCGCGGTGCAAACGAAAAATTTCTTAT  
CACAGCCCCACCTTGCATAAGCAACCATGCATTGCTCATGAGATCCACTT--

TGAACAATCGCTAATGCCTTCATACAGGAAGCCGCCGAGCTCGGTAAGGGTTCCTTCAAGTACG

CCTGGGTTCTTGACAAGCTCAAGGCCGAGCGTGAGCGTGGTATCACCATCGATATCGCTCTCTG  
GAAGTTGAGACCAACGAGTACAATGTCACCGTCATTGGTTAGTACCCCTCCACCTATGTTATGT  
GCTGCTCCATAAGACACTTGACTAACCTTGCTTCATAGACGCTCCCGGTCACCGTGATTTTCATCA  
AGAACATGCTGCCTTCTGGTATGTAACCTGTCTGTCTCGACACGGCCTCAATACGACGTTTTTCG  
TGCCTGCACGACAGCCCCGAACAG-  
TGAATTAGGTCAAGATAGAGGGAACATGATGCTAATAGGTCAATTGATAGGCAAACCATCTCTGG  
CGAGCACGGTCTCGACAGCAATGGAGTGTATGTACTATTTTCAATTCCTCCTGCTTCCTGTTGAG  
CTTGTAGGCTGAC-  
TCGATGACCATTTAGCTACAACGGTACCTCCGAGCTCCAGCTCGAGCGTATGAGCGTCTACTTC  
AACGAGGCTTCCGGCAACAAGTACGTTCCCTCGTGCCGTCCTCGTCGATCTCGAGCCCGGTACCA  
TGGATGCCGTCCGCGCCGGTCCCTTCGGCCAGCTCTTCGCCCTGACAACCTTCGCTTCGGTCA  
GTC????????????????

>N\_ellipsospora\_MFLUCC\_12\_0283

CATTATAGAGTTTTCTAAACTCCCAACCCATGTGAACCTACCTTTTGTTCCTCGGCAGAAGTTAT  
AGGTCTTCTTATAGCTGCTGCCGGTGGACCATTAACTCTTGTTATTTTATGTAATCTGAGCGTCT  
TATTTTAATAAGTCAAACTTTCAACAACGGATCTCTTGGTTCTGGCATCGATGAAGAACGCAGC  
GAAATGCGATAAGTAATGTGAATTGCAGAATTCAGTGAATCATCGAATCTTTGAACGCACATTG  
CGCCATTAGTATTCTAGTGGGCATGCCTGTTTCGAGCGTCATTTCAACCCTTAAGCCTAGCTTAG  
TGTTGGGAATCTACTTCTCTTAGGAGTTGTAGTTCCTGAAATACAACGGCGGATTTGTAGTATCC  
TCTGAGCGTAGTAA-  
TTTTTTTCTCGTTTTGTTAGGTGCTATAACTCCCAGCCGCTAAACCCCAATTTTTTGTGGTTGAC  
CTCGGATCAGGTAGAAGGTTAGTCATTTATTGATTCCAATCAT-----CATCCCCCTTCAC-  
TTCAGCATCATAATTTCAACCTACGTGTTGAAAATTA-TTTCGCTCCTTCCACAC--TTTT--  
TCGCTGGTTACCCCGCCACGAGGCACCCGCACGACCCCGCGATGCAAACGAAAAATTTCTTAT  
CACAGCCCCACCTTACACAAGCAACCATGCATTGCTCATGAGACCCACTT--  
TGAACAATTGCTAATGCCTTCATACAGGAAGCCGCGGAGCTCGGTAAGGGTTCCTTCAAGTACG  
CCTGGGTTCTTGACAAGCTCAAGGCCGAGCGTGAGCGTGGTATCACCATCGATATCGCTCTCTG  
GAAGTTGAGACCAACGAGTACAATGTCACCGTCATTGGTTAGTACCCCTCCACCTATGCCATG  
TGCTGCTCCATAAGACACTTGACTAACCTTGCTTCATAGACGCTCCCGGTCACCGTGATTTTCATC  
AAGAACATGCTGCTTTCTGGTATGTAATCTGTCTGCCTCGACACGGCCTTAATACGACGTTTTTC  
GTGCCTGCACGATGGCCCCGATCAG-  
TGAATTAGGTCAAGATACAGGGAACATGATGCTAATAGGTCAATTTATAGGCAAACCATCTCTGG  
CGAGCACGGTCTCGACAGCAATGGAGTGTATGTACTATTTTCAATTCCTCCTGCTTCCTGTTGAG  
CTTGTAGGCTGAC-  
TCGATGGCCATTTAGCTACAACGGTACCTCCGAGCTCCAGCTCGAGCGTATGAGCGTCTACTTC  
AACGAGGCTTCCGGCAACAAGTACGTTCCCTCGTGCCGTCCTCGTCGATCTCGAGCCCGGTACCA  
TGGATGCCGTCCGCGCCGGTCCCTTCGGCCAGCTCTTCGCCCTGACAACCTTCGCTTCGGTCA  
GTCCGGTGCTGGCAACAACCTGG

>N\_eucalypticola\_CBS\_264\_37

CATTATAGAGTTTTCTAAACTCCCAACCCATGTGAACCTACCTTTTGTTCCTCGGCAGAAGTTAT  
AGGTCTTCTTATAGCTGCTGCCGGTGGACCATTAACTCTTGTTATTTTATGTAATCTGAGCGTCT  
TATTTTAATAAGTCAAACTTTCAACAACGGATCTCTTGGTTCTGGCATCGATGAAGAACGCAGC  
GAAATGCGATAAGTAATGTGAATTGCAGAATTCAGTGAATCATCGAATCTTTGAACGCACATTG  
CGCCATTAGTATTCTAGTGGGCATGCCTGTTTCGAGCGTCATTTCAACCCTTAAGCCTAGCTTAG

TGTTGGGAATCTACTTCTTTA--  
TAGTTGTAGTTCCTGAAATACAACGGCGGATTTGTAGTATCCTCTGAGCGTAGTAA-  
TTTTTTCTCGCTTTTGTAGGTGCTATAACTCCCAGCCGCTAAACCCCAATTTTTGTGGTTGAC  
CTCGGATCAGGTAGAAGGTTAGTCATCTATTGATTCCCATCAT-----CATTCCCCTTCAC-  
TTCAGCGTCATGATTTTCAACATACGTGTTGAAAATTA-TTTTCGCTCCTTCCACACTTTTTTT--  
TCGCTGGTTACCCCGCCGCGAGGCACCCGCACGACCCCGCGGTGCAAACGAAAAATTTCTTAT  
CACAGCCCCACCTTGCACAAGCAACCATGCATTACTCATGAGACCCACTT--  
TGAACAATTGCTAATTCCTTCATTAGGAAGCCGCGGAGCTCGGTAAGGGTTCCTTCAAGTACG  
CCTGGGTTCTTGACAAGCTCAAGGCCGAGCGTGAGCGTGGTATCACCATCGATATCGCTCTCTG  
GAAGTTCGAGACCAACGAGTACAATGTCACCGTCATTGGTACGTACCCCTCCACCTATGCCATG  
TACTGCTCCATAAGACACTTGACTAACCTTGCTTCATAGACGCTCCCGGTACCCGTGATTTTCATC  
AAGAACATGCTGCCTTCTGGTATGTAACCTGTCTGTCTCGACACGGCCTCAATACGACGTTTTTC  
GTGCCTGCACGACGGCCCCGAACAG-  
TGAATTAGGTCAAGATAGAGGGAACATGATGCTAATAGGTTCATTGATAGGCAAACCATCTCTGG  
CGAGCACGGTCTCGACAGCAATGGAGTGTATGTAATTTTTAATTCTCCTGCTTCCTGTTAAG  
CTTGTAGGCTGAC-  
TCGATGGCCATTTAGCTACAACGGTACCTCCGAGCTCCAGCTCGAGCGTATGAGCGTCTACTTC  
AACGAGGCTTCCGGCAACAAGTACGTTCCCTCGTGCCGTCCTCGTATCTCGAGCCCGGTACCA  
TGGATGCCGTCCGCGCCGGTCCCTTCGGCCAGCTCTTCCGCCCTGACAACCTTCGCTTCGGTCA  
GTCCGGTGCTGGCAACAACACTGG  
>N\_eucalyptorum\_CBS\_147684  
????????????????AACTCCAACCCATGTGAACTTACCTTTTGTGCCTCGGCAGAAGTTATAGGT  
CTTCTTATAGCTGCTGCCGGTGGACCATTAACTCTTGTTATTTTATGTAATCTGAGCGTCTTATTT  
TAATAAGTCAAACCTTTCAACAACGGATCTCTTGGTCTGGCATCGATGAAGAACGCAGCGAAA  
TGCATAAGTAATGTGAATTGCAGAATTCAGTGAATCATCGAATCTTTGAACGCACATTGCGCC  
CATTAGTATTCTAGTGGGCATGCCTGTTTCGAGCGTCATTTCAACCCTTAAGCCTAGCTTAGTGT  
GGGAATCTACTTCTTTTATTAGTTGTAGTTCCTGAAATACAACGGCGGATTTGTAGTATCCTCTGA  
GCGTAGTAA-  
TTTTTTCTCGCTTTTGTAGGTGCTATAACTCCCAGCCGCTAAACCCCAATTTTTGTGGTTGAC  
CTCGGATCAGGT????????????????GATTCCCATCAT-----CATTCCCCTTCAC-  
TTCGGCATCATAATTTTCAACCTACGTGTTGAAAATTA-TTTTCGCTCTTCCACAC--TTTT--  
TCGATGGTTACCCCGCCGCGAGGCACCCGCACGACCCCGCGGTGCAAACGAAAAATTTCTTAT  
CACAGCCCCACCTTGCACAAGCAACCATGCATTGCTCATGAGACCCACTT--  
TGAACAATTGCTAATGCCTTCATACAGGAAGCCGCGGAGCTCGGTAAGGGTTCCTTCAAGTACG  
CCTGGGTTCTTGACAAGCTCAAGGCCGAGCGTGAGCGTGGTATCACCATCGATATCGCTCTCTG  
GAAGTTCGAGACCAACGAGTACAATGTCACCGTCATTGGTATAGTACCCCTACACCCATGCCATG  
TGCTGCTCCATAAGACACTTGACTAACCTTGCTTCATAGACGCTCCCGGTACCCGTGATTTTCATC  
AAGAACA????????????????????????????????GACACGGCCTTAATACGACGTTTTTCGTGCCTGC  
ACGACGGCCCCGAACAG-  
TGATATAGGTGAGGATAGAGGGAACATGATGCTAATAGGTTCATTGATAGGCAAACCATCTCTGG  
CGAGCACGGTCTCGACAGCAATGGAGTGTATGTAATTTTTAATTCTCCTGCTTCCTGTTAAG  
CTTGTAGGCTGAC-  
TCGATGGCCATTTAGCTACAACGGTACCTCCGAGCTCCAGCTCGAGCGTATGAGCGTCTACTTC  
AACGAGGCTTCCGGCAACAAGTACGTTCCCTCGTGCCGTCCTCGTATCTCGAGCCCGGTACCA

TGGATGCCGTCCGCGCCGGTCCCTTCGGCCAGCTCTTCGCCCTGACAACCTTCGTCTTCGGTCA  
GTCCGGTGCTGGCAACAACCTGG

>N\_eucalyptorum\_PE194

CATTATAGAGTTTTCTAAACTCCCAACCCATGTGAACTTACCTTTTGTTGCCTCGGCAGAAGTTAT  
AGGTCTTCTTATAGCTGCTGCCGGTGGACCATTAACTCTTGTTATTTTATGTAATCTGAGCGTCT  
TATTTTAATAAGTCAAACTTTCAACAACGGATCTCTTGGTTCTGGCATCGATGAAGAACGCAGC  
GAAATGCGATAAGTAATGTGAATTGCAGAATTCAGTGAATCATCGAATCTTTGAACGCACATTG  
CGCCATTAGTATTCTAGTGGGCATGCCTGTTTCGAGCGTCATTTCAACCCCTAAGCCTAGCTTAG  
TGTTGGGAATCTACTTCTTTTATTAGTTGTAGTTCCTGAAATACAACGGCGGATTTGTAGTATCCT  
CTGAGCGTAGTAA-

TTTTTTTCTCGCTTTTGTTAGGTGCTATAACTCCCAGCCGCTAAACCCCAATTTTTTGTTGTTGAC  
CTCGGATCAGGT????????????????TTGATTCCCATCAT-----CATTCCCCTTCAC-

TTCGGCATCATAATTTCAACCTACGTGTTGAAAATTA-TTTTCGCTCTTCCACAC--TTTT--

TCGATGGTTACCCCGCCGCGAGGCACCCGCACGACCCCGCGGTGCAAACGAAAAATTTCTTAT  
CACAGCCCCACCTTGCACAAGCAACCATGCATTGCTCATGAGACCCACTT--

TGAACAATTGCTAATGCCTTCATACAGGAAGCCGCCGAGCTCGGTAAGGGTTCCTTCAAGTACG  
CCTGGGTTCTTGACAAGCTCAAGGCCGAGCGTGAGCGTGGTATCACCATCGATATCGCTCTCTG  
GAAGTCGAGACCAACGAGTACAATGTCACCGTCATTGGTTAGTACCCCTACACCCATGCCATG  
TGCTGCTCCATAAGACACTTGACTAACCTTGCTTCATAGACGCTCCCGGTCACCGTGATTTTCATC  
AAGAACA????????????????AACCTGTCTGCCTCGACACGGCCTTAATACGACGTTTTTCGTGC  
CTGCACGACGGCCCCGAACAG-

TGATATAGGTCAGGATAGAGGGAACATGATGCTAATAGGTCATTGATAGGCAAACCATCTCTGG  
CGAGCACGGTCTCGACAGCAATGGAGTGTATGTAATTTTTAATTCCTCCTGCTTCTGTTAAG  
CTTGTAGGCTGAC-

TCGATGGCCATTTAGCTACAACGGTACCTCCGAGCTCCAGCTCGAGCGTATGAGCGTCTACTTC  
AACGAGGCTTCCGGCAACAAGTACGTTCTCGTGCCGTCCTCGTCGATCTCGAGCCCGGTACCA  
TGGATGCCGTCCGCGCCGGTCCCTTCGGCCAGCTCTTCGCCCTGACAACCTTCGTCTTCGGTCA  
GTCCGGTGCTGGCAACAACCTGG

>N\_foedans\_CGMCC\_3\_9123

CATTATAGAGTTTTCTAAACTCCCAACCCATGTGAACTTACCTTTTGTTGCCTCGGCAGAAGTTAT  
AGGTCTTCTTATAGCTGCTGCCGGTGGACCATTAACTCTTGTTATTTTATGTAATCTGAGCGTCT  
TATTTTAATAAGTCAAACTTTCAACAACGGATCTCTTGGTTCTGGCATCGATGAAGAACGCAGC  
GAAATGCGATAAGTAATGTGAATTGCAGAATTCAGTGAATCATCGAATCTTTGAACGCACATTG  
CGCCATTAGTATTCTAGTGGGCATGCCTGTTTCGAGCGTCATTTCAACCCCTAAGCCTAGCTTAG  
TGTTGGGAATCTACTTCTTTAGGAGTTGTAGTTCCTGAAATACAACGGCGGATTTGTAGTATCC  
TCTGAGCGTAGTAA-

TCTTTTTCTCGCTTTTGTTAGGTGCTATAACTCCCAGCCGCTAAACCCCAATTTTTTGTTGTTGA  
CCTCGGATCAGGTAGAAGGTTAGTCATGTATTGATTCCCATCAT-----CCCCCTTCAC-

TTCAGCATCATAAATTTCAACCTGCGTGTGAAAATTA-TTTTCGCTCCTTCCACACTTTTTTT---  
CGCTGGTTACCCCGCCGCGAGGCACCCGCACGACCCCGCGGTGCAAACGAAAAATTTCTTATC

ACAGCCCCACCTTGCACAAGCAACCATGCATTGCTCATGAGACCCACTT--

TGAACAATTGCTAATGCCTTCATACAGGAAGCCGCCGAGCTCGGTAAGGGTTCCTTCAAGTACG  
CCTGGGTTCTTGACAAGCTCAAGGCCGAGCGTGAGCGTGGTATCACCATCGATATCGCTCTCTG  
GAAGTCGAGACCAACGAGTACAATGTCACCGTCATTGGTTAGTACCCCTCCACCTATGCCATG



TGCTGCTCCATAAGACACTTGACTAACCTTGCTTCAAAGACGCTCCCGGTCACCGTGATTTTCATC  
AAGAACATGCTGCTTTCTGGTATGTAACCTGTCTGCCTCGACACGGCCTTAATACGACGTTTTTC  
GTGCCTGCACGACGGCCCCGAACAG-  
TGAATTAGGTCAAGATAGAGGGAACATGATGCTAATAGGTCATTGATAGGCAAACCATCTCTGG  
CGAGCACGGTCTCGACAGCAATGGAGTGTATGTAATTTTTAATTCCTCCTGCTTCCTGTTAAG  
CTTGTAGGCTGAC-  
TCGATGGCCATTTAGCTACAACGGTACCTCCGAGCTCCAGCTCGAGCGTATGAGCGTCTACTTC  
AACGAGGCTTCCGGCAACAAGTACGTTCCCTCGTGCCGTCCTCGTCGATCTCGAGCCCGGTACCA  
TGGATGCCGTCCGCGCCGGTCCCTTCGGCCAGCTCTTCGCCCTGACAACCTTCGTCTTCGGTCA  
GTCCGGTGCTGGCAACAACCTGG

>N\_formicarum\_CBS\_115\_83

CATTATAGAGTTTTCTAAACTCCCAACCCATGTGAACCTTACCTTTTGTTGCCTCGGCAGAAGTTAT  
AGGTCTTCTTATAGCTGCTGCCGGTGGACCATTAACTCTTGTTATTTTATGTAATCTGAGCGTCT  
TATTTTAATAAGTCAAACTTTCAACAACGGATCTCTTGTTCTGGCATCGATGAAGAACGCAGC  
GAAATGCGATAAGTAATGTGAATTGCAGAATTCAGTGAATCATCGAATCTTTGAACGCACATTG  
CGCCATTAGTATTCTAGTGGGCATGCCTGTTTCGAGCGTCATTTCAACCCCTAAGCCTAGCTTAG  
TGTTGGGAATCTACTTCTTTTATTAGTTGTAGTTCCTGAAATACAACGGCGGATTTGTAGTATCCT  
CTGAGCGTAGTAA-

TTTTTTCTCGTTTTGTTAGGTGCTATAACTCCCAGCCGCTAAACCCCAATTTTTGTGGTTGAC  
CTCGGATCAGGTAGAAGTTAGTCATCTATTGATTCCCATCAT-----CATTCCCCTTCTC-  
TTCAGCGTCATGATTTTCAACCTACGCGTTGAAATTA-TTTTCGCTCCTTCCACAC--TTTTT--  
TCGCTGGTTACCCCGCCGCGAGGCACCCGCACGACCCCGCGGTGCAAACGAAAAATTTCTTAT  
CACAGCCCCACCTTTCACAAGCAACCATGCATTGCTCATGAGACCCACTT--  
TGAACGATTGCTAATGCCTTCATACAGGAAGCCCGCGAGCTCGGTAAGGGTTCCTTCAAGTACG  
CCTGGGTTCTTGACAAGCTCAAGGCCGAGCGTGAGCGTGGTATCACCATCGATATCGCTCTCTG  
GAAGTTCGAGACCAACGAGTACAATGTCACCGTCATTGGTTAGTACCCCTCCACCTATGCCATG  
TGCTGCTCCATAAGACACTTGACTAACCTTGCTTCATAGACGCTCCCGGTCACCGTGATTTTCATC  
AAGAACATGCTGCCTTCTGGTATGTAATCTGTCTGCCTCGACACGGCCTTAATACGACGTTTTTC  
GTGCCTGCACGACGGCCCCGATCAG-

TGAATTAGGTCAAGATACAGGGAACATGATGCTAATAGGTCATTTATAGGCAAACCATCTCTGG  
CGAGCACGGTCTCGACAGCAATGGAGTGTATGTAATTTTTCAATTCCTCCTGCTTCCTGTTGAG  
CTTGTAGGCTGAC-  
TCGATGGCCATTTAGCTACAACGGTACCTCCGAGCTCCAGCTCGAGCGTATGAGCGTCTACTTC  
AACGAGGCTTCCGGCAACAAGTACGTTCCCTCGTGCCGTCCTCGTCGATCTCGAGCCCGGTACCA  
TGGATGCCGTCCGCGCCGGTCCCTTCGGCCAGCTCTTCGCCCTGACAACCTTCGTCTTCGGTCA  
GTCCGGTGCTGGCAACAACCTGG

>N\_formicarum\_CBS\_362\_72

CATTATAGAGTTTTCTAAACTCCCAACCCATGTGAACCTTACCTTTTGTTGCCTCGGCAGAAGTTAT  
AGGTCTTCTTATAGCTGCTGCCGGTGGACCATTAACTCTTGTTATTTTATGTAATCTGAGCGTCT  
TATTTTAATAAGTCAAACTTTCAACAACGGATCTCTTGTTCTGGCATCGATGAAGAACGCAGC  
GAAATGCGATAAGTAATGTGAATTGCAGAATTCAGTGAATCATCGAATCTTTGAACGCACATTG  
CGCCATTAGTATTCTAGTGGGCATGCCTGTTTCGAGCGTCATTTCAACCCCTAAGCCTAGCTTAG  
TGTTGGGAATCTACTTCTTTAGGAGTTGTAGTTCCTGAAATACAACGGCGGATTTGTAGTATCC  
TCTGAGCGTAGTAA-

TTTTTTTCTCGCTTTTGTAGGTGCTATAACTCCCAGCCGCTAAACCCCCAATTTTTTGTGGTTGAC  
CTCGGATCAGGTAGAAGGTTAGTCATCTATTGATTCCCATCAT-----CATTACCTTCTC-  
TTCAGCGTCATGATTTTCAACCTACGCGTTGAAAATTA-TTTTCGCTCCTTCCACAC--TTTTT--  
TCGCTGGTTACCCCGCCGCGAGGCACCCGCACGACCCCGCGGTGCAAACGAAAAATTTCTTAT  
CACAGCCCCACCTTTCACAAGCAACCATGCATTGCTCATGAGACCCACTT--  
TGAACGATTGCTAATGCCTTCATACAGGAAGCCGCCGAGCTCGGTAAGGGTTCCTTCAAGTACG  
CCTGGGTTCTTGACAAGCTCAAGGCCGAGCGTGAGCGTGGTATCACCATCGATATCGCTCTCTG  
GAAGTTCGAGACCAACGAGTACAATGTCACCGTCATTGGTTAGTACCCCTCCACCTATGCCATG  
TGCTGCTCCATAAGACACTTGACTAACCTTGCTTCATAGACGCTCCCGGTCACCGTGATTTATC  
AAGAACATGCTGCCTTCTGGTATGTAATCTGTCTGCCTCGACACGGCCTAATACGACGTTTTTC  
GTGCCTGCACGACGGCCCCGATCAG-  
TGAATTAGGTCAAGATACAGGGAACATGATGCTAATAGGTCATTTATAGGCAAACCATCTCTGG  
CGAGCACGGTCTCGACAGCAATGGAGTGTATGTAATAATTTCAATTCTCCTGCTTCTGTTGAG  
CTTGTAGGCTGAC-  
TCGATGGCCATTTAGCTACAACGGTACCTCCGAGCTCCAGCTCGAGCGTATGAGCGTCTACTTC  
AACGAGGCTTCCGGCAACAAGTACGTTCCCTCGTGCCGTCCTCGTCGATCTCGAGCCCGGTACCA  
TGGATGCCGTCCGCGCCGGTCCCTTCGGCCAGCTCTTCCGCCCTGACAACCTTCGTCTTCGGTCA  
GTCCGGTGCTGGCAACAACCTGG

>N\_guajavae\_FMB0026

CATTATAGAGTTTTCTAAACTCCCAACCCATGTGAACCTTACCTTTTGTTCCTCGGCAGAAGTTAT  
AGGTCTTCTTATAGCTGCTGCCGGTGGACCATTAAACTCTTGTATTTTATGTAATCTGAGCGTCT  
TATTTTAATAAGTCAAACTTTCAACAACGGATCTCTTGGTTCTGGCATCGATGAAGAACGCAGC  
GAAATGCGATAAGTAATGTGAATTGCAGAATTCAGTGAATCATCGAATCTTTGAACGCACATTG  
CGCCATTAGTATTCTAGTGGGCATGCCTGTTTCGAGCGTCATTTCAACCCCTAAGCCTAGCTTAG  
TGTTGGGAATCTACTTCTTTA--

TAGTTGTAGTTCCTGAAATACAACGGCGGATTTGTAGTATCCTCTGAGCGTAGTAA-  
TTTTTTTCTCGCTTTTGTAGGTGCTATAACTCCCAGCCGCTAAACCCCCAATTTTTTGTGGTTGA  
CCTCGGATCAGGT????????????????????????????????????????????????????  
ACCTACGTGTTGAAAATA-TTTTCGCTCCTTCCACAC--TTTTT---

CGCTGGTTACCCCGCCGCGAGGCACCCGCACGACCCCGCGGCGCAAACGAAAAATTTCTTATC  
ACAGCCCCACCTTGATAAGCAACCATGCATTGCTCATGAGATCCACTT--  
TGAACAATTGCTAATGCCTTCATACAGGAAGCCGCCGAGCTCGGTAAGGGTTCCTTCAAGTACG  
CCTGGGTTCTTGACAAGCTCAAGGCCGAGCGTGAGCGTGGTATCACCATCGATATCGCTCTCTG  
GAAGTTCGAGACCAACGAGTACAATGTCACCGTCATTGGTTAGTACCCCTCCACCTATGCCATG  
TGCTGCTGCATAAGACACTTGACTAACCTTGCTTCATAGACGCTCCCGGTCACCGTGATTTATC  
??????TGCTGCCTTCTGGTATGTTACCTGTCTGCCTCGACACGGCCTTACTACGACGTTTTTCGTG  
CCTGCACGACGGCCCCGAACAG-

TGAAATAGGTCAAGATAGAGGGAACATGATACTAATAGGTCATTTATAGGCAAACCATCTCTGG  
CGAGCACGGTCTCGACAGCAATGGAGTGTATGTAATAACTTCAATTCTCCTGCTTCTGTTGAG  
TTTGTAGGCTGAC-

TCGATGGCCATTTAGCTACAACGGTACCTCCGAGCTCCAGCTCGAGCGTATGAGCGTCTACTTC  
AACGAGGCTTCCGGCAACAAGTACGTTCCCTCGTGCCGTCCTCGTCGATCTCGAG????????????  
????????????????????????????????????????????????????????????????

>N\_guajavicola\_FMB0129

??????GAGTTTTCTAAACTCCCAACCCATGTGAACTTACCTTTTGTGCCTCGGCAGAAGTTATA  
GGTCTTCTTATAGCTGCTGCCGGTGGACCATTAAACTCTTGTATTTTATGTAATCTGAGCGTCTT  
ATTTTAATAAGTCAAACCTTTCAACAACGGATCTCTTGGTTCTGGCATCGATGAAGAACGCAGCG  
AAATGCGATAAGTAATGTGAATTGCAGAATTCAGTGAATCATCGAATCTTGAACGCACATTGC  
GCCATTAGTATTCTAGTGGGCATGCCTGTTGAGCGTCATTTCAACCCTTAAGCCTAGCTTAGT  
GTTGGGAATCTACTTCTTTA--  
TAGTTGTAGTTCCTGAAATACAACGGCGGATTTGTAGTATCCTCTGAGCGTAGTAA-  
TTTTTTTCTCGCTTTTGTAGGTGCTATAACTCCCAGCCGCTAAACCCCAATTTTTTGTGGTTGAC  
CTCGGATCAGGT????????????????????????????????????????????????????????A  
CCTACGTGTTGAAAATTA-TTTTCGCTCCTTCCACAC--TTTTT--  
TCGCTGGTTACCCCGCCGCGAGGCACCCGCACGACCCCGCGGTGCAAACGAAAAATTTCTTAT  
CACAGCCCCACCTTGCACAAGCAACCATGCATTGCTCATGAGACCCACTT--  
TGAACAATTGCTAATGCCTTCATACAGGAAGCCGCCGAGCTCGGTAAGGGTTCCTTCAAGTACG  
CCTGGGTTCTTGACAAGCTCAAGGCCGAGCGTGAGCGTGGTATCACCATCGATATCGCTCTCTG  
GAAGTTCGAGACCAACGAGTACAATGTCACCGTCATTGGTTAGTACCCCTCCACCTATGCCATG  
TGCTGCACCATAAGACACTTACTAACCTTG????????????????????????????????????TGCT  
GCCTTCTGGTATGTAACCTGTCTGTCTCGACACGGCCTCAATACGACGTTTTTCGTGCCTGCACG  
ACAGCCCCGAACAG-  
TGAATTAGGTCAAGATAGAGGGAACATGATGCTAATAGGTCATTGATAGGCAAACCATCTCTGG  
CGAGCACGGTCTCGACAGCAATGGAGTGTATGACTATTTTCAATTCCTCCTGCTTCTGTTGAG  
CTTGTAGGCTGAC-  
TCGATGGCCATTTAGCTACAACGGTACCTCCGAGCTCCAGCTCGAGCGTATGAGCGTCTACTTC  
AACGAGGCTTCCGGCAACAAGTACGTTCCCTCGTGCCGCTCCTCGTGCATCTCGAGCCCGGTACCA  
TGGATGCCGTCCGCGCCGGTCCCTTCGGCCAGCTCTTCGCCCTGACAACCTTCGTCTTCGGTCA  
GTCCGGTGCTGGCAACAACCTGG  
>N\_hadrolaeliae\_VIC\_47180  
????????????????????????????????????????????????????????CTCGGCAGAAGTTATAGGTCTTCTTATA  
GCTGCTGCCGGTGGACCATTAAACTCTTGTATTTTATGTAATCTGAGCGTCTTATTTAATAAGT  
CAAACCTTTCAACAACGGATCTCTTGGTTCTGGCATCGATGAAGAACGCAGCGAAATGCGATAA  
GTAATGTGAATTGCAGAATTCAGTGAATCATCGAATCTTGAACGCACATTGCGCCCATTAGTAT  
TCTAGTGGGCATGCCTGTTGAGCGTCATTTCAACCCTTAAGCCTAGCTTAGTGTGGGAATCTA  
CTTCTTTA--  
TAGTTGTAGTTCCTGAAATACAACGGCGGATTTGTAGTATCCTCTGAGCGTAGTAA-  
TTTTTTTCTCGCTTTTGTAGGTGCTATAACTCCCAGCCGCTAAACCCCAATTTTTTGTGGTTGAC  
CTCGGATCAGGT????GTTAGTCATCTATTGATTCCCATCAT-----CATTCCCCTTAC-  
TTCAGCGTCATGATTTTCAACATACGTGTTGAAAATTA-TTTTCGCTCCTTCCACACTTTTTTT--  
TCGCTGGTTACCCCGCCGCGAGGCACCCGCACGACCCCGCGGTGCAAACGAAAAATTTCTTAT  
CACAGCCCCACCTTGCACAAGCAACCATGCATTGCTCATGAGACCCACTT--  
TGAACAATTGCTAATTCCTTCATTGAGGAAGCCGCCGAGCTCGGTAAGGGTTCCTTCAAGTACG  
CCTGGGTTCTTGACAAGCTCAAGGCCGAGCGTGAGCGTGGTATCACCATCGATATCGCTCTCTG  
GAAGTTCGAGACCAACGAGTACAATGTCACCGTCATTGGTTCAGTACCCCTCCACCTATGCCATG  
TACTGCTCCATAAGACACTTACTAACCTTGCTTCATAGACGCTCCCGGTCACCGTGATTTTCATC  
AAG????TGCTGCCTTCTGGTATGTAACCTGTCTGCCTCGACACGGCCTTGATACGACGTTTTTCG  
TGCTGCACGACGGCCCCGAACAG-

TGAATTAGGTCAAGATACAGGGAACATGATGCTAATAGGTCATTTATAGGCAAACCATCTCTGG  
CGAGCACGGTCTCGACAGCAATGGAGTGTATGTACCATTTTCAATCCCTCCTGCTTCCTGTTGAG  
CTTGTAGGCTGAC-

TCGATGGCCATTTAGCTACAACGGTACCTCCGAGCTTCAGCTCGAGCGTATGAGCGTCTACTTC  
AACGAGGCTTCTGGCAACAAGTACGTTCCCTCGTGCCGTCCTCGTCGATCTCGAGCCCGGTACCA  
TGGATGCCGTCCGCGCTGGTCCCTTCGGCCAGCTCTTCGCCCTGACAACCTTCGTCTTCGGTCA  
GTCCGGTGCTGGCAACAA????

>N\_hispanica\_CBS\_147686

????????????????AACTCCC-

ACCCATGTGAACCTTACCTTTTGTTCCTCGGCAGAAGTTATAGGCTTCTTATAGCTGCTGCCGG  
TGGACCATTAACCTCTTGTTATTTTATGTAATCTGAGCGTCTTATTTTAATAAGTCAAACTTTCAA  
CAACGGATCTCTTGTTCTGGCATCGATGAAGAACGCAGCGAAATGCGATAAGTAATGTGAATT  
GCAGAATTCAGTGAATCATCGAATCTTTGAACGCACATTGCGCCATTAGTATTCTAGTGGGCAT  
GCCTGTTGAGCGTCATTTCAACCCTTAAGCCTAGCTTAGTGTGGGAATCTACTTCTTTTATTAG  
TTGTAGTTCCTGAAATACAACGGCGGATTTGTAGTATCCTCTGAGCGTAGTAATTTTTTTCTCGC  
TTTTGTTAGGTGCTATAACTCCCAGCCGCTAAACCCCAATTTTTGTGGTTGACCTCGGATCAG  
GT????????????????GATTCCCGTCAT-----CATCCCCCTTCAC-

TTCAGCATCATAATTTCAACCTACGTGTTGAAAATTA-TTCTCGCTCCTTCCACAC--TTTT--

TCGCTGGTTACCCCGCCGCGAGGCACCCGCACGACCCCGCGGTGCAAACGAAAAATTTCTTAT  
CACAGCCCCACCTTGCACAAGCAACCATGCATTGCTCATGAGACCCACTT--

TGAACAATTGCTAATGCCTTCATACAGGAAGCCGCCGAGCTCGGTAAGGGTTCCTTCAAGTACG  
CCTGGGTTCTTGACAAGCTCAAGGCCGAGCGTGAGCGTGGTATCACCATCGATATCGCTCTCTG  
GAAGTTCGAGACCAACGAGTACAATGTCACCGTCATTGGTTAGTACCCCTCCACCTATGCCATG  
TGCTGCTCCATAAGACACTTACTAACCTTGCTTCATAGACGCTCCCGGTACCCGTGATTTTCATC  
AAGAACA????????????????????????????????GACACGGCCTTGATACGACGTTTTTCGTGCCTGC  
ACGACGGCCCCGAACAG-

TGAATTAGGTCAAGATAGAGGGAACATGATGCTAATAGGTCATTGATAGGCAAACCATCTCTGG  
CGAGCACGGTCTCGACAGCAATGGAGTGTATGTAATTTTCAATTCCTCCTGCTTCCTGTTGAG  
CTTGTAGGCTGAC-

TCGATGGCCATTTAGCTACAACGGTACCTCCGAGCTCCAGCTCGAGCGTATGAGCGTCTACTTC  
AACGAGGCTTCCGTAACAAGTACGTTCCCTCGTGCCGTCCTCGTCGATCTCGAGCCCGGTACCA  
TGGATGCCGTCCGCGCCGGTCCCTTCGGCCAGCTCTTCGCCCTGACAACCTTCGTCTTCGGTCA  
GTCCGGTGCTGGCAACAACCTGG

>N\_honoluluana\_CBS\_114495

CATTATAGAGTTTTCTAAACTCCCAACCCATGTGAACCTTACCTTTTGTTCCTCGGCAGAAGTTAT  
AGGTCTTCTTATAGCTGCTGCCGGTGGACCATTAACCTCTTGTTATTTTATGTAATCTGAGCGTCT  
TATTTTAATAAGTCAAACTTTCAACAACGGATCTCTTGTTCTGGCATCGATGAAGAACGCAGC  
GAAATGCGATAAGTAATGTGAATTGCAGAATTCAGTGAATCATCGAATCTTTGAACGCACATTG  
CGCCATTAGTATTCTAGTGGGCATGCCTGTTGAGCGTCATTTCAACCCTTAAGCCTAGCTTAG  
TGTTGGGAATCTACTTCTTA--

TAGTTGTAGTTCCTGAAATACAACGGCGGATTTGTAGTATCCTCTGAGCGTAGTAA--

TTTTTCTCGCTTTTGTAGGTGCTATAACTCCCAGCCGCTAAACCCCAATTTTTGTGGTTGAC  
CTCGGATCAGGTAGAAGGTTAGTCATCTATTGATTCCCATCAT-----CATTCCCCCTTCAC-  
TTCAGCGTCATGATTTTCAACATGCGTGTGAAAATTA-TTTCGCTCCTTCCACAC-TTTTT--

TCGCTGGTTACCCCGCCGCGAGGCACCCGCACGACCCCGCGGTGCAAACGAAAAATTTCTTAT  
CACAGCCCCACCTTGCACAAGCAACCATGCATTACTCATGAGACCCACTT--  
TGAACAATTGCTAATTCCTTCATTAGGAAGCCGCGGAGCTCGGTAAGGGTTCCTTCAAGTACG  
CCTGGGTTCTTGACAAGCTCAAGGCCGAGCGTGAGCGTGGTATCACCATCGATATCGCTCTCTG  
GAAGTTCGAGACCAACGAGTACAATGTCACCGTCATTGGTACGTACCCTTCCACCTATGCCATG  
TACTGCTCCATAAGACACTTGACTAACCTTGCTTCATAGACGCTCCCGGTCACCGTGATTTTCATC  
AAGAATGCTGCCTTCTGGTATGTAACCTGTCTGCCTCGACACGGCCTTGATACGACGTTTTTC  
GTGCCTGCACGACGGCCCCGAACAG-

TGAATTAGGTCAAGATACAGGGAACATGATGCTAATAGGTCAATTTATAGGCAAACCATCTCTGG  
CGAGCACGGTCTCGACAGCAATGGAGTGTATGTACCATTTTCAATCCCTCCTGCTTCTGTTGAG  
CTTGTAGGCTGAC-

TCGATGGCCATTTAGCTACAACGGTACCTCCGAGCTTCAGCTCGAGCGTATGAGCGTCTACTTC  
AACGAGGCTTCTGGCAACAAGTACGTTCCCTCGTGCCGTCCTCGTTCGATCTCGAGCCCGGTACCA  
TGGATGCCGTCGCGCTGGTCCCTTCGGCCAGCTCTTCGCCCCTGACAACCTTCGCTTTCGGTCA  
GTCCGGTGCTGGCAACAACCTGG

>N\_hydeana\_MFLUCC\_20\_0132

CATTATAGAGTTTTCTAAACTCCCAACCCATGTGAACCTTACCTTTTGTTCCTCGGCAGAAGTTAT  
AGGTCTTCTTATAGCTGCTGCCGGTGGACCATTAAACTCTTGTTATTTTATGTAATCTGAGCGTCT  
TATTTTAATAAGTCAAACTTTCAACAACGGATCTCTTGGTTCTGGCATCGATGAAGAACGCAGC  
GAAATGCGATAAGTAATGTGAATTGCAGAATTCAGTGAATCATCGAATCTTTGAACGCACATTG  
CGCCATTAGTATTCTAGTGGGCATGCCTGTTTCGAGCGTCATTTCAACCCTTAAGCCTAGCTTAG  
TGTTGGGAATCTACTTCTTTA--

TAGTTGTAGTTCCTGAAATACAACGGCGGATTTGTAGTATCCTCTGAGCGTAGTAA-  
TTTTTTTCTCGTTTTGTTAGGTGCTATAACTCCCACCCGCTAAACCCCAATTTTTTGTGGATGAC  
CTCGGATCCGGT????????????TATAATTGTTTTTCGCTG-----ATTCTCCTTCAC-

TTCAGCGTCATGATTTTCAACCTACGTGTTGAAAATTA-TTTTCGCTCCTTCCACAC--TTTT--  
TCGCTGGTTACCCCGCCGCGAGGCACCCGCACGACCCCGCGGTGCAAACGAAAAATTTCTTAT  
CACAGCCCCACCTTGCATAAGCAACCATGCATTGCTCATGAGATCCACTT--

TGAACAATTGCTAATGCCTTCATACAGGAAGCCGCGGAGCTCGGTAAGGGTTCCTTCAAGTACG  
CCTGGGTTCTTGACAAGCTCAAGGCCGAGCGTGAGCGTGGTATCACCATCGATATCGCTCTCTG  
GAAGTTCGAGACCAACGAGTACAATGTCACCGTCATTGGTATAGTACCCTCCACCTGTGCCATG  
TGCTGCTCCATAAGACACTTGACTAACCTTGCTTCATAGACGCTCCCGGTCACCGTGATTTTCATC  
AAG????TGCTGCTTCTGGTATGTTACCTGTCTGCCTCGACACGGCCTC-

ATACGACGTTTTTTCGTGCCTGCACGACAGCCCCGAACAG-

TGAATTAGGTCAAGATAGAGGGAACATGATGCTAATAGGTCAATGATAGGCAAACCATCTCTGG  
CGAGCACGGTCTCGACAGCAATGGAGTGTATGTACTATTTTCAATTCCTCCTGCTTCTGTTGAG  
CTTGTAGGCTGAC-

TCGATGACCATTTAGCTACAACGGTACCTCCGAGCTCCAGCTCGAGCGTATGAGCGTCTACTTC  
AACGAGGCTTCCGGCAACAAGTACGTTCCCTCGTGCCGTCCTCGTTCGATCTCGAGCCCGGTACCA  
TGGATGCCGTCGCGCCGGTCCCTTCGGCCAGCTCTTCGCCCCTGACAACCTTCGCTTTCGGTCA  
GTCCGGTGCTGGCAACAACCTGG

>N\_iberica\_CBS\_147688

CATTATAGAGTTTTCTAAACTCCCAACCCATGTGAACCTTACCTTTTGTTCCTCGGCAGAAGTTAT  
AGGTCTTCTTATAGCTGCTGCCGGTGGACCATTAAACTCTTGTTATTTTATGTAATCTGAGCGTCT

TATTTTAATAAGTCAAACCTTTCAACAACGGATCTCTTGGTTCTGGCATCGATGAAGAACGCAGC  
GAAATGCGATAAGTAATGTGAATTGCAGAATTCAGTGAATCATCGAATCTTTGAACGCACATTG  
CGCCATTAGTATTCTAGTGGGCATGCCTGTTTCGAGCGTCATTTCAACCCCTAAGCCTAGCTTAG  
TGTTGGGAATCTACTTCTTTTATTAGTTGTAGTTCCTGAAATACAACGGCGGATTTGTAGTATCCT  
CTGAGCGTAGTAA-

TTTTTTCTCGCTTTTGTAGGTGCTATAACTCCCAGCCGCTAAACCCCAATTTTTGTGGTTGAC  
CTCGGATCAGGT????????????????????ATTCCCCTCAT-----CATTCTCCTTCAC-

TTCAGCGTCATGATTTTCAACCTACGTGTTGAAAATTA-TTTTCGCTCCTTCCACAC--TTTT--  
TCGCTGGTTACCCCGCCGCGAGGCACCAGCACGACCCCGCGGTGCAAACGAAAAATTTCTTAT  
CACAGCCCCACCTTGCATAAGCAACCATGCATTGCTCATGAGATCCACTT--

TGAACAATTGCTAATGCCTTCATACAGGAAGCCGCCGAGCTCGGTAAGGGTTCCTTCAAGTACG  
CCTGGGTTCTTGACAAGCTCAAGGCCGAGCGTGAGCGTGGTATCACCATCGATATCGCTCTCTG  
GAAGTTCGAGACCAACGAGTACAATGTCACCGTCATTGGTTAGTACCACTCCACCTATGCCATG  
TGCTGCTCATAAGACACTTGACTAACCTTGCTTCGTAGACGCTCCCGGTCACCGTGATTTTCATC  
AAGAACA????????????????????AAGTGTCTGCCTCGACACGGCCTTGATACGACGTTTTTCGTGCC  
TGCACGACGGCCCCGAACAG-

TGAATTAGGTCAAGATAGAGGGAACATGATGCTAATAGGTTCATTGATAGGCAAACCATCTCTGG  
CGAGCACGGTCTCGACAGCAATGGAGTGTACTATTTTCAATTCTCCTGCTTCTGTTGAG  
CTTGTAGGCTGAC-

TCGATGGCCATTTAGCTACAACGGTACCTCCGAGCTCCAGCTCGAGCGTATGAGCGTCTACTTC  
AACGAGGCTTCCGTAACAAGTACGTTCCCTCGTGCCGCTCCTCGTCGATCTCGAGCCCGGTACCA  
TGGATGCCGTCCGCGCCGGTCCCTTCGGCCAGCTCTTCCGCCCTGACAACCTTCGTCTTCGGTCA  
GTCCGGTGCTGGCAACAACCTGG

>N\_iraniensis\_CBS\_137768

????????????????????????????????????????CTTACCTTTTGTTCCTCGGCAGAAGTTACAGGTTACCC  
TGTAGCTGCTGCCGGCGGACCATTAACTCTTGTATTTTATGTAATCTGAGCGTCTATTTTAAAT  
AAGTCAAACCTTTCAACAACGGATCTCTTGGTTCTGGCATCGATGAAGAACGCAGCGAAATGCG  
ATAAGTAATGTGAATTGCAGAATTCAGTGAATCATCGAATCTTTGAACGCACATTGCGCCCATTA  
GTATTCTAGTGGGCATGCCTGTTTCGAGCGTCATTTCAACCCCTAAGCCTAGCTTAGTGTGGGAA  
TCTACCTCTTTCTTTTATTGTAGTTCCTGAAATACAACGGCGGATTTGTAGTATCCTCTGAGCGTA  
GTAA-

ATCTTTTCTCGCTTTTGTGAGGTGCTGCGACTCCCAGCCGCTAAACCCCAATTTTTGTGGTTGA  
CCTCGGATCAGGTAGAAGGTTAGTCATCTATTGATTCCCATCAT-----

CAGTCCGGTGCACAACCTGGCATGAT--  
TTTTAGCCTGCGTGTGAAAAAGATTTTTGGCACCTTACACTC--TTTT--

TCGCTCGTTACCCCGCCGCAAGACACCTGCACGACCCCGCGGTGCAAACGAAAAATTTCTTATC  
ACGGCCCCACCTTGCACGAGCAACCATGCATTGCTTATGAGACCCACTT--

TGAACATTAGCTAATGCCTTCACACAGGAAGCCGCCGAGCTCGGTAAGGGTTCCTTCAAGTACG  
CCTGGGTTCTTGACAAGCTCAAGGCCGAGCGTGAGCGTGGTATCACCATCGATATCGCTCTCTG  
GAAGTTCGAGACCAACGAGTACAATGTCACCGTCATTGGTTAGTACCCTACCATCTATGCCATG  
TGCTGCTCAGTTAGACAGTT-ACTAACAATACT---

CAGACGCTCCCGGTCACCGTGATTTTCATCAAGAACATGCTGCCTTCTGGTATGTTACCTGTCTGC  
CTCGACACGGCCTTACTACGACGTTTTTCGTGCCTGCACGACGGCCCCGAACAG-

TGAAATAGGTCAAGATAGAGGGAACATAATGCTAATAGGTTCATTTATAGGCAAACCATCTCTGG







TGTTGGGAATCTACTTCTTTTATTAGTTGTAGTTCCTGAAATACAACGGCGGATTTGTAGTATCCT  
CTGAGCGTAGTAA-  
TTTTTTTCTCGCTTTTGTAGGTGCTATAACTCCCAGCCGCTAAACCCCAATTTTTTGTGGTTGAC  
CTCGGATCAGGT????????????????????????????????TCAT-----CATTCCCCTTCAC-  
TTCGGCATCATAATTTCAACCTACGTGTTGAAAATTA-TTTTCGCTCCTTCCACACTTTTTTT--  
TCGCTGGTTACCCCGCCGCGAGGCACCCGCACGACCCCGCGGTGCAAATGAAAAATTTCTTATC  
ACAGCCCCACTTTGCACAAGCAACCATGCATTGCTCATGGGACCCACTT--  
TGAACAATTGCTAATGCCTTCATACAGGAAGCCGCCGAGCTCGGTAAGGGTTCCTTCAAGTACG  
CCTGGGTTCTTGACAAGCTCAAGGCCGAGCGTGAGCGTGGTATCACCATCGATATCGCTCTCTG  
GAAGTTCGAGACCAACGAGTACAATGTCACCGTCATTGGTCAGTACCCCTCCACCTATGCCATG  
TGCTGCTCCATAAGACACTTGACTAACCTTGCTTCATAGACGCTCCCGGTACCCGTGATTTTCATC  
AAGAACA????????????????????????????????????????????????????????TTATAACGACGTTTTTCGTGCCTGCACG  
ACGGCCCCGAACAG-  
TGAAATAGGTCAAGATAGAGGGAACATGATACTAATAGGTCAATTTATAGGCAAACCATCTCTGG  
CGAGCACGGTCTCGACAGCAATGGAGTGTATGGACTAACTTCAATTCCTCCAGCTTCTGTTGA  
GTTTGTAGGCTGAC-  
TCGATGGCCATTTAGCTACAACGGTACCTCCGAGCTCCAGCTCGAGCGTATGAGCGTCTACTTC  
AACGAGGCTTCCGGCAACAAGTACGTTCCCTCGTGCCGTCCTCGTGCATCTCGAGCCCGGTACCA  
TGGATGCCGTCCGCGCCGGTCCCTTCGGCCAGCTCTTCCGCCCTGACAACCTTCGTCTTCGGTCA  
GTCCGGTGCTGGCAACAACCTGG  
>N\_lusitanica\_MEAN\_1320  
????????????????TAA--TCCC-  
ACCCATGTGAACCTTACCTTTTGTTCCTCGGCAGAAGTTATAGGTCTTCTTATAGCTGCTGCCGG  
TGGACCATTAACCTCTTGTATTTTATGTAATCTGAGCGTCTTATTTAATAAGTCAAACTTTCAA  
CAACGGATCTCTTGGTTCTGGCATCGATGAAGAACGCAGCGAAATGCGATAAGTAATGTGAATT  
GCAGAATTCAGTGAATCATCGAATCTTTGAACGCACATTGCGCCATTAGTATTCTAGTGGGCAT  
GCCTGTTTCGAGCGTCATTTCAACCCTTAAGCCTAGCTTAGTGTGGGAATCTACTTCTTTTATTAG  
TTGTAGTTCTGAAATACAACGGCGGATTTGTAGTATCCTCTGAGCGTAGTAA-  
TTTTTTTCTCGCTTTTGTAGGTGCTATAACTCCCAGCCGCTAAACCCCAATTTTTTGTGGTTGAC  
CTCGGATCAGGTAGAAGGTTAGTCATCTATTGATTCCCATCAT-----CATTCCCCTTCAC-  
TTCGGCATCATAATTTCAACCTACGTGTTGAAAATTA-TTTTCGCTCCTTCCACACTTTTTTT--  
TCGCTGGTTACCCCGCCGCGAGGCACCCGCACGACCCCGCGGTGCAAATGAAAAATTTCTTATC  
ACAGCCCCACTTTGCACAAGCAACCATGCATTGCTCATGGGACCCACTT--  
TGAACAATTGCTAATGCCTTCATACAGGAAGCCGCCGAGCTCGGTAAGGGTTCCTTCAAGTACG  
CCTGGGTTCTTGACAAGCTCAAGGCCGAGCGTGAGCGTGGTATCACCATCGATATCGCTCTCTG  
GAAGTTCGAGACCAACGAGTACAATGTCACCGTCATTGGTCAGTACCCCTCCACCTATGCCATG  
TGCTGCTCCATAAGACACTTGACTAACCTTGCTTCATAGACGCTCCCGGTACCCGTGATTTTCATC  
AAGAACA????????TTGTTGTA-----  
CCTGTCTGCCTCGACACGGCCTTACTACGACGTTTTTCGTGCCTGCACGACGGCCCCGAACAG-  
TGAAATAGGTCAAGATAGAGGGAACATGATACTAATAGGTCAATTTATAGGCAAACCATCTCTGG  
CGAGCACGGTCTCGACAGCAATGGAGTGTATGGACTAACTTCAATTCCTCCAGCTTCTGTTGA  
GTTTGTAGGCTGAC-  
TCGATGGCCATTTAGCTACAACGGTACCTCCGAGCTCCAGCTCGAGCGTATGAGCGTCTACTTC  
AACGAGGCTTCCGGCAACAAGTACGTTCCCTCGTGCCGTCCTCGTGCATCTCGAGCCCGGTACCA

TGGATGCCGTCCGCGCCGGTCCCTTCGGCCAGCTCTTCGCCCTGACAACCTTCGTCTTCGGTCA  
GTCCGGTGCTGGCAACAACCTGG  
>N\_macadamiae\_BRIP\_63737c  
?????????????CCAA--  
TCCCAACCCATGTGAACTTACCTTTTGTTCCTCGGCAGAAGTTATAGGTCTTCTTATAGCTGCTG  
CCGGTGGACCATTAACTCTTGTATTTTATGTAATCTGAGCGTCTATTTTAATAAGTCAAACCT  
TTCAACAACGGATCTCTTGGTTCTGGCATCGATGAAGAACGCAGCGAAATGCGATAAGTAATGT  
GAATTGCAGAATTCAGTGAATCATCGAATCTTTGAACGCACATTGCGCCATTAGTATTCTAGTG  
GGCATGCCTGTTGAGCGTCATTTCAACCCTAAGCCTAGCTTAGTGTGGGAATCTACTTCTCT  
TAGGAGTTGTAGTTCCTGAAATACAACGGCGGATTTGTAGTATCCTCTGAGCGTAGTAA-  
TTTTTTTCTCGCTTTTGTAGGGGTATAACTCCCAGCCGCTAAACCCCAATTTTTTGTGGGTGA  
CCTCGGATCAGG????????????????????????????????????????????????????????  
?????????????AAAATTA-TTTTCGCTCCTTCCACAC--TTTT--  
TCGCTGGTTACCCCGCCGCGAGGCACCCGCACGACCCCGCGGTGCAAACGAAAAATTTCTTAT  
CACAGCCCCACCTTGCATAAGCAACCATGCTTTGCTCATGAGATCCACTT--  
TGAACAATTGCTAATGCCTTCATACAGGAAGCCGCCGAGCTCGGTAAGGGTTCCTTCAAGTACC  
TGTG????????????????????????????????????????????????????????????  
????????????????????????????????????????????????????????????  
????????????????????????????????????????????????????????????  
????????????????????????????????????????????????????????ACACGACCTTAATACGACGTTTTTC  
GTGCCTGCACGACGGCCCCGAACAG-  
TGAAATAGGTCAAGATAGAGGGAACATAATACTAATAGGTCAATTTATAGGCAAACCATCTCTGG  
CGAGCACGGTCTCGACAGCAATGGAGTGTATGTAATACTCAATTCTCCTGCTTCTGTTGAG  
CTTGATAGGCTGAC-  
TTGATGGCCATTTAGCTACAACGGTACCTCCGAGCTCCAGCTCGAGCGTATGAGCGTCTACTTC  
AACGAGGCTTCCGGCAACAAGTACGTTTCTCGTGCCGTCCTCGTCGATCTCGAGCCCGGTACCA  
TGGATGCCGTCCGCGCCGGTCCCTTCGGCCAGCTCTTCGCCCTGACAACCTTCGTCTTCGGTCA  
GTCCGGTGCTGGCAACAACCTGG

>N\_maddoxii\_BRIP\_72266a  
CATTATAGAGTTTTCTAACTCCCAACCCATGTGAACTTACCTTTTGTTCCTCGGCAGAAGTTAT  
AGGATTTCTTATAGCTGCTGCCGGTGGACCATTAACTCTTGTATTTTATGTAATCTGAGCGTCT  
TATTTTAATAAGTCAAACCTTTCAACAACGGATCTCTTGGTTCTGGCATCGATGAAGAACGCAGC  
GAAATGCGATAAGTAATGTGAATTGCAGAATTCAGTGAATCATCGAATCTTTGAACGCACATTG  
CGCCATTAGTATTCTAGTGGGCATGCCTGTTTCGAGCGTCATTTCAACCCTAAGCCTAGCTTAG  
TGTTGGGAATCTACTTCTTA--  
TAGTTGTAGTTCCTGAAATACAACGGCGGATTTGTAGTATCCTCTGAGCGTAGTAA-  
TTTTTTTCTCGCTTTTGTAGGTGCTATAACTCCCAGCCGCTAAACCCCAATTTTTTGTGGTTGAC  
CTCGGATCAGGTAGAAGGTTAGTCATTTATTGATTCCCATCAT-----CATCCCCCTTAC-  
TTCAGCATCATAATTTTCAACCTACGTGTTGAAAATTA-TTTTCGCTCCTTCCACAC--TTTT--  
TCGCTGGTTACCCCGCCGCGAGGCACCCGCACGACCCCGCGGTGCAAACGAAAAATTTCTTAT  
CACAGCCCCACCTTGCACAAGCAACCATGCATTGCTCATGAGACCCACTT--  
TGAACAATTGCTAATGCCTTCATACAGGAAGCCGCCGAGCTCGGTAAGGGTTCCTTCAAGTACG  
CCTGGGTTCTTGACAAGCTCAAGGCCGAGCGTGAGCGTGGTATCACCATCGATATCGCTCTCTG  
GAAGTTCGAGACCAACGAGTACAATGTCACCGTCATTGGTTAGTACCCCTCCACCTATGCTATG  
TGCTGCTCCATAAGACACTTGACTAACTTTGCTTCATAGACGCTCCCGGTCACCGTGATTTTCATC

AAGAACA????GCTTTCTGGTATGTAACCTGTCTGTCTCGACACGGCCTCAATACGACGTTTTTCG  
TGCCTGCACGACGGCCCCGAACAG-  
TGAATTAGGTCAAGATAGAGGGAACATGATGCTAATAGGTTCATCGATAGGCAAACCATCTCTGG  
CGAGCACGGTCTCGACAGCAATGGAGTGTATGTAATTTTTAATTCCTCCTGCTTCTGTTAAG  
CTTGTAGGCTGAC-  
TCGATGGCCATTTAGCTACAACGGTACCTCCGAGCTCCAGCTCGAGCGTATGAGCGTCTACTTC  
AACGAGGCTTCCGGCAACAAGTACGTTCCCTCGTGCCGTCCTCGTTCGATCTCGAGCCCCGGTACCA  
TGGATGCCGTCCGCGCCGGTCCCTTCGGCCAGCTCTTCGGCCCTGACAACCTTCGTCTTCGGTCA  
GTCCGGTGCTGGCAACAACCTGG

>N\_magna\_MFLUCC\_12\_0652

CATTATAGAGTTTTCTAAACTCCCAACCCATGTGAACCTTACCTTTTGTTGCCTCGGCAGAAGCTAT  
AGGACTTCTTATAGCTGCTGCCGGTGGACCACTAAACTCTTGTTATTTTATGGAATCTGAGCGTC  
TTATTTTAATAAGTCAAACTTTCAACAACGGATCTCTTGGTTCTGGCATCGATGAAGAACGCAG  
CGAAATGCGATAAGTAATGTGAATTGCAGAATTCAGTGAATCATCGAATCTTTGAACGCACATT  
GCGCCCATTAGTATTCTAGTGGGCATGCCTGTTTCGAGCGTCATTTCAACCCTTAAGCCTAGCTTA  
GTGTTGGGAATCTACTTCTTAGGAGTCGTAGTTCCTGAAATACAACGGCGGATTTATAGTGTC  
CTCTGAGCGTAGTAA-

TTTTTTTCTCGCTTTTGTGAGGTGCTGTAACCTCCAGCCGCTAAACCCCTAATTTTTTGTGGTTGAC  
CTCGGATCAGGTAGAAGGTTAGTC---TATTGATTACCATCAC-----CATTCTTTTCAA-  
TTCAGGGTCATGATTTTCAACC---ACGTTGAAAATTA-TTTCGCTCCTTCCACACTTTTTTT--  
CCGCTGGTTACCCCGCCGCGAGGCCACCCGCACGACCCCGCGGTGCAAACGAAAAATTTCTTAT  
CACAGCCCCACCTTGCACAAGCAACCATGCATTGCTCATGAGACCCACTT--  
TGAATAATTGCTAATGCCTTGATACAGGAAGCTGCCGAGCTCGGTAAGGGTTCCTTCAAGTACG  
CCTGGGTTCTTGACAAGCTCAAGGCCGAGCGTGAGCGTGGTATCACCATCGATATCGCTCTCTG  
GAAGTTCGAGACCAACGAGTACAATGTCACCGTCATTGGTTAGTACCTCTCCACCTATGTCATGT  
TCTGCACCATAAGACACTTGACTAACCTTGCTTTATAGACGCTCCCGGTCACCGTGATTTTATCA  
AGAACATGCTGCCTTCTGGTATGTAACCTGTCTGCCTCGACACGGCCTTGATACGACGTTTTTTG  
TGCCTTCACGACGGCCCCGAACAG-

GGAATTAGGTCAAGATACAGGGAACATAATGCTAATAGGTCAATTTATAGGCAAACCATCTCTGG  
CGAGCACGGTCTCGACAGCAATGGAGTGTATGTAATTTTTCAATTCCTCCTGCTTCTGCTGAG  
CTTGTAGGCTGAC-

TCGATGGCCATTTAGCTACAACGGTACCTCCGAGCTCCAGCTCGAGCGTATGAGCGTCTACTTC  
AACGAGGCTACCGGCAACAAGTATGTTCCCTCGTGCCGTCCTCGTTGATCTCGAGCCCCGGTACCA  
TGGATGCCGTCCGCTCTCATCCGTG????????????????????????????????????????  
??????

>N\_mesopotamica\_CBS\_336\_86

CATTATAGAGTTTTCTAAACTCCCAACCCATGTGAACCTTACCTTTTGTTGCCTCGGCAGAAGTTAT  
AGGTCTTCTTATAGCTGCTGCCGGTGGACCACTAAACTCTTGTTATTTTATGTAATCTGAGCGTCT  
TATTTTAATAAGTCAAACTTTCAACAACGGATCTCTTGGTTCTGGCATCGATGAAGAACGCAGC  
GAAATGCGATAAGTAATGTGAATTGCAGAATTCAGTGAATCATCGAATCTTTGAACGCACATTG  
CGCCATTAGTATTCTAGTGGGCATGCCTGTTTCGAGCGTCATTTCAACCCTTAAGCCTAGCTTAG  
TGTTGGGAATCTACTTCTTTTATTAGTTGTAGTTCCTGAAATACAACGGCGGATTTGTAGTATCCT  
CTGAGCGTAGTAATTTCTTTTCTCGCTTTTGTTAGGTGCTATAACTCCAGCCGCTAAACCCCAA  
TTTTTTGTGGTTGACCTCGGATCAGGT???????TAGTCATTTATTGATTCCCGTCAT-----

CATCCCCCTTCAC-TTCAGCATCATAATTTTCAACCTACGTGTTGAAAATTA-  
TTTTCGCTCCTTCCACAC--TTTT--  
TCGCTGGTTACCCCGCCGCGAGGCACCCGCACGACCCCGCGGTGCGAACGAAAAATTTCTTAT  
CACAGCCCCACCTTGCACAAGCAACCATGCATTGCTCATGAGACCCACTT--  
TGAACAATTGCTAATGCCTTCATACAGGAAGCCGCCGAGCTCGGTAAGGGTTCCTTCAAGTACG  
CCTGGGTTCTCGACAAGCTCAAGGCCGAGCGTGAGCGTGGTATCACCATCGATATCGCTCTCTG  
GAAGTTCGAGACCAACGAGTACAATGTCACCGTCATTGGTTAGTACCCCTCCACCTATGCCATG  
TGCTGCTCCATAAGACACTTGACTAACCTGCTTCATAGACGCTCCCGGTCACCGTGATTTTCATC  
AAGA??TGCTGCCTTCTGGTATGTAACCTGTCTGTCTCGACACGGCCTCAATACGACGTTTTTCG  
TGCCTGCACGACAGCCCCGAACAG-  
TGAATTAGGTCAAGATAGAGGGAACATGATGCTAATAGGTTCATTGATAGGCAAACCATCTCTGG  
CGAGCACGGTCTCGACAGCAATGGAGTGTATGTACTATTTTTAATTCCTCCTGCTTCCTGTTGAG  
CTTGTAGGCTGAC-  
TCGATGGCCATTTAGCTACAACGGTACCTCCGAGCTCCAGCTCGAGCGTATGAGCGTCTACTTC  
AACGAGGCTTCCGGCAACAAGTACGTTCCCTCGTGCCGTCCTCGTCGATCTCGAGCCCGGTACCA  
TGGATGCCGTCCGCGCCGGTCCCTTCGGCCAGCTCTTCGCCCTGACAACCTTCGTCTTCGGTCA  
G????????????????????  
>N\_musae\_MFLUCC\_15\_0776  
CATTATAGAGTTTTCTAAACTCCCAACCCATGTGAACCTACCTTTTGTTCCTCGGCAGAAGTTAT  
AGGTCTTCTTATAGCTGCTGCCGGTGGACTATTAACCTCTTGTATTTTTATGTAATCTGAGCGTCT  
TATTTAATAAGTCAAACTTTCAACAACGGATCTCTTGGTTCTGGCATCGATGAAGAACGCAGC  
GAAATGCGATAAGTAATGTGAATTGCAGAATTCAGTGAATCATCGAATCTTTGAACGCACATTG  
CGCCATTAGTATTCTAGTGGGCATGCCTGTTTCGAGCGTCATTTCAACCCTTAAGCCTAGCTTAG  
TGTTGGGAATCTACTTCTTTTATTAGTCGTAGTTCCTGAAATACAACGGCGGATTTGTGGTATCCT  
CTGAGCGTAGTAATTTTTTCTCGCTTTTGTAGGTGCTATGACTCCCAGCCGCTAAACCCCA  
ATTTTTGTGG-TGACCTCGGATCAGGT????????????????????CATCAT-----  
CATTCCCTTCAC-TTCAGCATCATAATTTTCAACCTACGTGTTGAAAATTA-  
TTTTCGCTCCTTCCACAC--CTTT--  
TCGCTGGTTACCCCGCCGCGAGGCACCCGCACGACCCCGCGGTGCAAACGAAAAATTTCTTAT  
CACAGCCCCACCTTGCATAAGCAACCATGCATTGCTCATGAGATCCACTT--  
TGAACAATTGCTAATGCCTTCATACAGGAAGCCGCCGAGCTCGGTAAGGGTTCCTTCAAGTACG  
CCTGGGTTCTTGACAAGCTCAAGGCCGAGCGTGAGCGTGGTATCACCATCGATATCGCTCTCTG  
GAAGTTCGAGACCAACGAGTACAATGTCACCGTCATTGGTTAGTACCCCTCCACCTATGCCATG  
TGCTGCTCCATAAGACATTTGACTAACCTGCTTCATAGACGCTCCCGGTCACCGTGATTTTCATC  
AAGAACA????????????????????TCTG-CTCGA-  
ACGGCCTTGATACGACGTTTTTCGTGCCTGCACGACGGCCCCGAACAG-  
TGAATTAGGTCAAGATACAGGGAACATGATGCTAATAGGTTCATTTATAGGCAAACCATCTCTGG  
CGAGCACGGTCTCGACAGCAATGGAGTGTATGTACCATTTTCAATTCCTTCTGCTTCCTGTTGAG  
CTTGTAGGCTGAC-  
TCGATGGCCATTTAGCTACAACGGTACCTCCGAGCTTCAGCTCGAGCGTATGAGCGTCTACTTC  
AACGAGGCTTCTGGCAACAAGTACGTTCCCTCGTGCCGTCCTCGTCGATCTCGAGCCCGGTACCA  
TGGATGCCGTCCGCGCCGGTCCCTTCGGCCAGCTCTTCGCCCTGACAACCTTCGTCTTCGGTCA  
GTCCGGTGCTGGCAACAACCTGG

>N\_natalensis\_CBS\_138\_41

CATTATAGAGTTTTCTAAACTCCCAACCCATGTGAACTTACCTTTTGTTCCTCGGCAGAGGTTA  
CGGGTACCCTGTAGCTGCTGCCGGTGGACCATTAACTCTTGTATTTTATGTAATCTGAGCGT  
CTTATATTAATAAGTCAAACTTTCAACAACGGATCTCTTGGTTCTGGCATCGATGAAGAACGCA  
GCGAAATGCGATAAGTAATGTGAATTGCAGAATTCAGTGAATCATCGAATCTTTGAACGCACAT  
TGCGCCATTAGTATTCTAGTGGGCATGCCTGTTTCGAGCGTCATTTCAACCCTTAAGCCTAGCTT  
AGTGTGGGAATCTACCTCTCTTCGGAGTCGTAGTTCCCTGAAATACAACGGCGGATTTGTAGTAT  
CCTCTGAGCGTAGTAA-  
ATTTTTCTCGCTTTTGTAGGTGCTGCAACTCCCAGCCGCTAAACCCCTATTTTTTTTGGTTGAC  
CTCGGATCAGGTAGAAGGTTAGTCATCAATCGGTTCCCATCAT-----CTCCCTCAC-  
TCCAGCGTCATGATTTTACAGCTACGTGTTGAAGATCAATTTTCGCTCCTCCACACTTTTTTCTC  
CCGATCGTTACCCCGCCGTGAGGCACCCGCACGACCCCGCGGTGCAAACGAAAAATTTCTTAT  
CACAGCCCCACCTTGCACAAGCCGACATGCATTGCGTACGAGACCCACTT--  
TAAACAAGTCTAATGTCTTCATACAGGAAGCCGCCGAGCTCGGTAAGGGTTCCTTCAAGTACG  
CCTGGGTTCTTGACAAGCTCAAGGCCGAGCGTGAGCGTGGTATCACCATCGATATCGCTCTCTG  
GAAGTTCGAGACCAACGAGTACAATGTCACTGTCATTGGTTAGTACCTTATCACCTATGCCATGT  
GCTGCACAATAAGACTCTT-  
ACTAATAGTACTCCTCAGACGCTCCCGGTCACCGTGATTTTCATCAAGAACATGCTGCCTTCTGGT  
ATGTAACCTGCCTACCTCGACCCGGCTTCAATACGACATTTTTTCGTGACTTCACGACAGCCTCGA  
ACAC-  
TTGGTAGGGTCAAGATAGAGAGAACACGATGCTAATTGGTCATTTATAGGCAAACCATCTCTGG  
CGAGCACGGTCTCGACAGCAATGGAGTGTATGTACCATTTTAAATTCCTTTTGTCTTGTGAG  
CTCGTAGGCTGAC-  
TTGATCGCCCTTAGCTACAACGGTACCTCCGAGCTCCAGCTCGAGCGTATGAGCGTCTACTTC  
AACGAGGCTTCCGGCAACAAGTACGTTCCCTCGTGCCGTCCTGTGATCTCGAGCCCGGTACCA  
TGGATGCCGTCGCGCCGGTCCCTTCGGCCAGCTCTTCGGCCCTGACAACCTTCGTCTTCGGTCA  
GTCCGGTGCTGGCAACAAGTGG

>N\_nebuloides\_BRIP\_66617

CATTATAGAGTTTTCTAAACTCCCAACCCATGTGAACTTACCTTTTGTTCCTCGGCAGAAAGTTAT  
AGGTCTTCTTATAGCTGCTGCCGGTGGACCATTAACTCTTGTATTTTATGTAATCTGAGCGTCT  
TATTTAATAAGTCAAACTTTCAACAACGGATCTCTTGGTTCTGGCATCGATGAAGAACGCAGC  
GAAATGCGATAAGTAATGTGAATTGCAGAATTCAGTGAATCATCGAATCTTTGAACGCACATTG  
CGCCATTAGTATTCTAGTGGGCATGCCTGTTTCGAGCGTCATTTCAACCCTTAAGCCTAGCTTAG  
TGTTGGGAATCTACTTCTTTTATTAGTTGTAGTTCCCTGAAATACAACGGCGGATTTGTAGTATCCT  
CTGAGCGTAGTAA-  
TTTTTTCTCGCTTTTGTAGGTGCTATAACTCCCAGCCGCTAAACCCCAATTTTTTGTGGTTGAC  
CTCGGATCAGGTGAAGGTTAGTCATCTACTGATTCCCGTCAT-CATTATCATTCTCCTTCAC-  
TTCAGCGTCATGATTTTCAACCTATGTGTTGAAAATTA-TTTTCGCTCCTCCACAC--TTTT--  
TCGCTGGTTACCCCGCCGCGAGGCACCCGCACGACCCCGCGGTGCAAACGAAAAATTTCTTAT  
CACAGCCCCACCTTGCATAAGCAACCATGCATTGCTCATGAGATCCACTT--  
CGAACAATTGCTAATGCCTTCATACAGGAAGCCGCCGAGCTCGGTAAGGGTTCCTTCAAGTACG  
CCTGGGTTCTTGACAAGCTCAAGGCCGAGCGTGAGCGTGGTATCACCATCGATATCGCTCTCTG  
GAAGTTCGAGACCAACGAGTACAATGTCAACCGTCATTGGTTAGTACCCCTCCACCTATGCCATG  
TGCTGCTCCATAAGACACTTGACTAACCTTGCTTCATAGACGCTCCCGGTCACCGTGATTTTCATC  
AAGAACATGCTGCCTTCTGGTATGTTACCTGTCTGCCTCGACACGGCCTTACTACGACGTTTTTC

GTGCCTGCACGACGGCCCCGAACAG-  
TGAAATAGGTCAAGATAGAGGGAACATGATACTAATAGGTCAATTTATAGGCAAACCATCTCTGG  
CGAGCACGGTCTCGACAGCAATGGAGTGTATGTACTAACTTCAATTCCTCCTGCTTCCTGTTGAG  
TTTGTAGGCTGAC-  
TCGATGGCCATTTAGCTACAACGGTACCTCCGAGCTCCAGCTCGAGCGTATGAGCGTCTACTTC  
AACGAGGCTTCCGGCAACAAGTACGTTCCCTCGTGCCGTCCTCGTCGATCTCGAGCCCGGTACCA  
TGGATGCCGTCCGCGCCGGTCCCTTCGGCCAGCTCTTCGCCCTGACAACCTTCGTCTTCGGTCA  
GTCCGGTGCTGGCAACAACCTGG

>N\_olumideae\_BRIP\_72273a

CATTATAGAGTTTTCTAAACTCCCAACCCATGTGAACCTTACCTTTTGTTCCTCGGCAGAAGTTAT  
AGGTCTTCTTATAGCTGCTGCCGGTGGACCATTAACTCTTGTTATTTTATGTAATCTGAGCGTCT  
TATTTTAATAAGTCAAACTTTCAACAACGGATCTCTTGTTCTGGCATCGATGAAGAACGCAGC  
GAAATGCGATAAGTAATGTGAATTGCAGAATTCAGTGAATCATCGAATCTTTGAACGCACATTG  
CGCCATTAGTATTCTAGTGGGCATGCCTGTTTCGAGCGTCATTTCAACCCTTAAGCCTAGCTTAG  
TGTTGGGAATCTACTTCTTTTATTAGTTGTAGTTCCTGAAATACAACGGCGGATTTGTAGTATCCT  
CTGAGCGTAGTAA-

TTTTTTTCTCGTTTTGTTAGGTGCTATAACTCCCAGCCGCTAAACCCCAATTTTTTGTGGTTGAC  
CTCGGATCAGGTAGAAGGTCAGTCATTCATTGATTCCCATCAT-----CATCCCCCTTCAC-  
TTCAGCATCATAATTTTCAACCTACGTGTTGAAAATTA-TTTCGCTCCTTCCACAC-TTTTTT--  
CCGCTGGTTACCCCGCCGCGAGGCACCCGCACGACCCCGCGGTGCAAACGAAAAATTTCTTAT  
CACAGCCCCACCTTGCACAAGCAACCATGCATTGCTCATGAGACCCACTT--

TGAACAATTGCTAATGCCTTCATACAGGAAGCCGCGAGCTCGGTAAGGGTTCCTTCAAGTACG  
CCTGGGTTCTTGACAAGCTCAAGGCCGAGCGTGAGCGTGGTATCACCATCGATATCGCTCTCTG  
GAAGTTCGAGACCAACGAGTACAATGTCACCGTCATTGGTTAGTACCCCTCCACCTATGCCATG  
TGCTGCTCCATGAGACACTTGACTAACCTTGCTTCATAGACGCTCCCGGTACCCGTGATTTTCATC  
AAGAACA??TGCTTTCTGGTATGTTACCTGTCTGCCTCGACACGGCCTTACTACGACGTTTTTCG  
TGCCTGCACGACGGCCCCGAACAG-

TGAAATAGGTCAAGATAGAGGGAACATGATACTAATAGGTCAATTTATAGGCAAACCATCTCTGG  
CGAGCACGGTCTCGACAGCAATGGAGTGTATGTACTAACTTCAATTCCTCCTGCTTCCTGTTGAG  
TTTGTAGGCTGAC-

TCGATGGCCATTTAGCTACAACGGTACCTCCGAGCTCCAGCTCGAGCGTATGAGCGTCTACTTC  
AACGAGGCTTCCGGCAACAAGTACGTTCCCTCGTGCCGTCCTCGTCGATCTCGAGCCCGGTACCA  
TGGATGCCGTCCGCGCCGGTCCCTTCGGCCAGCTCTTCGCCCTGACAACCTTCGTCTTCGGTCA  
GTCCGGTGCTGGCAACAACCTGG

>N\_pandanicola\_KUMCC\_17\_0175

????????????????????????????????????????????????????????????????????  
????????????????????????????????????????????????????????????????????  
????????????????????????????????????????????????????????????????????  
????????????????????????????????????????????????????????????????????  
????????????????????????????????????????????????????????????????????  
????????????????????????????????????????????????????????????????????  
????????????????????????????????????????????????????????????????????

????????????????????????????????????????????????????????????????????  
????????????????????????????????????????????????????????????????????  
-----ACTTTCAGCGTCATGATTTTCAACCCACGTGTTGAAAATTA-  
TTTTCGCTCCTTCCACACTTTTTTTT--  
TCGGTGGTTACCCCGCCGCGAGGCACCCGCACGACCCCGCGGTGCAAACGAAAAATTTCTTAT

CACAGCCCCCCTTGCACAAGCAACCATGCATTGCTCATGAGACCCACTT--  
GAACCAATTGCTAATGTCTTCATACAGGAAGCCGCCGAGCTCGGTAAGGGTTCCTTCAAGTACG  
CCTGGGTTCTTGACAAGCTCAAGGCCGAGCGTGAGCGTGGTATCACCATCGATATCGCTCTCTG  
GAAGTTCGAGACCAACGAGTACAATGTCACCGTCATTGGTTAGTACCCCTCCACCTATGCCATG  
TGCTGCTCCATAAGACACTTACTAACCTTGCTTCATAGACGCTCCCGGTCACCGTGATTTTCATC  
AAGAACA????????????AAATAGACTGTCTGTCTCGAC-CGGCCTC-  
ATACGACGTTTTTCGTGCCTGCACGACAGCCCCGAACAG-  
TGAATTAGGTCAAGATAGAGGGAACATGATGCTAATAGGTTCATTGATAGGCAAACCATCTCTGG  
CGAGCACGGTCTCGACAGCAATGGAGTGTATGTACTATTTTCAATTCCTCCTGCTTCTGTTGAG  
CTTGTAGGCTGAC-  
TCGATGGCCATTTAGCTACAACGGTACCTCCGAGCTCCAGCTCGAGCGTATGAGCGTCTACTTC  
AACGAGGCTTCCGGCAACAAGTACGTTCCCTCGTGCCGTCCTCGTTCGATCTCGAGCCCCGGTACCA  
TGGATGCCGTCGCCGCGCGGTCCTTCGGCCAGCTCTCCGCCCTGACAACCTTCGCTTCCGGTCA  
GTCCGGTGCTGGCAACAACCTGG

>N\_pernambucana\_GS\_2014\_RV01

CATTATAGAGTTTTCTAAACTCCCAACCCATGTGAACCTTACCTTTTGTTCCTCGGCAGAA-  
TTATAGGTCTTCTTATAGCTGCTGCCGGTGGACCATTAAACTCTTGTATTTTATGTAATCTGAGC  
GTCTTATTTTAATAAGTCAAACTTTCAACAACGGATCTCTTGGTTCTGGCATCGATGAAGAACG  
CAGCGAAATGCGATAAGTAATGTGAATTGCAGAATTCAGTGAATCATCGAATCTTTGAACGCAC  
ATTGCGCCATTAGTATTCTAGTGGGCATGCCTGTTTCGAGCGTCATTTCAACCCTTAAGCCTAGC  
TTAGTGTGGGAATCTACTTCTTTTATTAGTTGTAGTTCCTGAAATACAACGGCGGATTTGTAGTA  
TCCTCTGAGCGTAGTAA-TTTTTTCTCGCTTTTGTAGGTGCTATAA-TCCCAGCCG-  
TAAACCCCAA????????????????????????????????AGAAAGTTAGTCATTTATTGATTCATCAT----  
---CATCCCCCTTCAC-CTCAGCATCATAATTTTCAACCTACGTGGTGAAAATTA-  
TTTTCGCTCCTTCCACACTTTTTTT--

TCGCTGGTTACCCCGCCGCGAGGCACCCGCACGACCCCGCGGTGCAAACGAAAAATTTCTTAT  
CACAGCCCCACCTTGCACAAGCAACCATGCATTGCTCATGAGACCCACTT--  
TGAACAATTGCTAATGCCTTCATACAGGAAGCCGCCGAGCTCGGTAAGGGTTCCTTCAAGTACG  
CCTGGGTTCTTGACAAGCTCAAGGCCGAGCGTGAGCGTGGTATCACCATCGATATCGCTCTCTG  
GAAGTTCGAGACCAACGAGTACAATGTCACCGTCATTGGTTAGTACCCCTCCACCTATGCCATG  
TGCTGCTCCATAAGACACTTACTAACCTTGCTTCATAGACGCTCCCGGTCACCGTGATTTTCATC  
AAGAACA????????????????????????????????????????????????????????????  
????????????????????????????????????????????????????????????????  
????????????????????????????????????????????????????????????????  
????????????????????????????????????????????????????????????????  
????????????????????????????????????????????????????????????????  
????????????????????????????????????????????????????????????????  
??

>N\_perukae\_FMB0127

????????????CTAAACTCCCAACCCATGTGAACCTTACCTTTTGTTCCTCGGCAGAAGTTATAGG  
TCTTCTTATAGCTGCTGCCGGTGGACCATTAAACTCTTGTATTTTATGTAATCTGAGCGTCTTATT  
TTAATAAGTCAAACTTTCAACAACGGATCTCTTGGTTCTGGCATCGATGAAGAACGCAGCGAA  
ATGCGATAAGTAATGTGAATTGCAGAATTCAGTGAATCATCGAATCTTTGAACGCACATTGCGC  
CCATTAGTATTCTAGTGGGCATGCCTGTTTCGAGCGTCATTTCAACCCTTAAGCCTAGCTTAGTGT  
TGGAATCTACTTCTTTA--

TAGTTGTAGTTCCTGAAATACAACGGCGGATTTGTAGTATCCTCTGAGCGTAGTAA-  
TTTTTTTCTCGCTTTTGTGAGGTGCTATAACTCCCAGCCGCTAAACCCCAATTTTTGTGGTTGA  
CCTCGGATCAGGT????????????????????????????????????????????????????????  
???TACGTGTTGAAAATTA-TTTTCGCTCCTCCACAC--TTTT--  
TCGCTGGTTACCCCGCCGCGAGGCACCCGCACGACCCCGCGGTGCAAACGAAAAATTTCTTAT  
CACAGCCCCACCTTGCACAAGCAACCATGCATTGCTCATGAGACCCACT--  
TGAACAATTGCTAATGCCTTCATACAGGAAGCCGCCGAGCTCGGTAAGGGTTCCTTCAAGTACG  
CCTGGGTTCTTGACAAGCTCAAGGCCGAGCGTGAGCGTGGTATCACCATCGATATCGCTCTCTG  
GAAGTTCGAGACCAACGAGTACAATGTCACCGTCATTGGTTAGTACCCCTCCACCTATGCCATG  
TGCTGCACCATAAGACACTTGACTIONAACCTTGCTTCATAGACGCTCCCGGTCACCGTGATTTTCATC  
AAG????TGCTGCCTTCTGGTATGTAACCTGTCTGCCTCGACACGGCCTTAATACGACGTTTTTCG  
TGCCTGCACGACGGCCCCGAACAG-  
TGAATTAGGTCAAGATAGAGGGAACATGATGCTAATAGGTCAATTGATAGGCAAACCATCTCTGG  
CGAGCACGGTCTCGACAGCAATGGAGTGTATGTACTATTTTTAATTCCTCCTGCTTCTGTTAAG  
CTTGTAGGCTGAC-  
TCGATGGCCATTTAGCTACAACGGTACCTCCGAGCTCCAGCTCGAGCGTATGAGCGTCTACTTC  
AACGAGGCTTCCGGCAACAAGTACGTTCCCTCGTGCCGTCCTCGTTGATCTCGAGCCCGGTACCA  
TGGATGCCGTCCGCGCCGGTCCCTTCGGCCAGCTCTCCGCCCTGACAACCTTCGTCTTCGGTCA  
GTCCGGTGCTGGCAACAACCTGG  
>N\_petila\_MFLUCC\_17\_1738  
CATTATAGAGTTTTCTAAACTCCCAACCCATGTGAACCTACCTTTTGTTCCTCGGCAGAAGTTAT  
AGGTCTTCTTATAGCTGCTGCCGGTGGACCATTAACTCTTGTATTTTATGTAATCTGAGCGTCT  
TATTTAATAAGTCAAACCTTCAACAACGGATCTCTGGTTCTGGCATCGATGAAGAACGCAGC  
GAAATGCGATAAGTAATGTGAATTGCAGAATTCAGTGAATCATCGAATCTTTGAACGCACATTG  
CGCCATTAGTATTCTAGTGGGCATGCCTGTTTCGAGCGTCATTTCAACCCCTAAGCCTAGCTTAG  
TGTTGGGAATCTACTTCTTTA--  
TAGTTGTAGTTCCTGAAATACAACGGCGGATTTGTAGTATCCTCTGAGCGTAGTAA-  
TTTTTTTCTCGCTTTTGTAGGTGCTATAACTCCCAGCCGCTAAACCCCAATTTTTGTGGTTGAC  
CTCGGATCAGGT?????TAGTCATTTATTGATTCCCATCAT-----CATCCCCCTTCAC-  
TTCAGCATCATAATTTCAACCTACGTGTTGAAAATTA-TTTTCGCTCCTCCACAC--TTTT--  
TCGCTGGTTACCCCGCCGCGAGGCACCCGCACGACCCCGCGGTGCAAACGAAAAATTTCTTAT  
CACAGCCCCACCTTGCACAAGCAACCATGCATTGCTCATGAGACCCACT--  
TGAACAATTGCTAATGCCTTCATACAGGAAGCCGCCGAGCTCGGTAAGGGTTCCTTCAAGTACG  
CCTGGGTTCTTGACAAGCTCAAGGCCGAGCGTGAGCGTGGTATCACCATCGATATCGCTCTCTG  
GAAGTTCGAGACCAACGAGTACAATGTCACCGTCATTGGTTAGTACCCCTCCACCTATGCCATG  
TGCTGCTCCATAAGACACTTGACTIONAACCTTGCTTCATAGACGCTCCCGGTCACCGTGATTTTCATC  
AAG????TGCTGCCTTCTGGTATGTAATCTGTCTGCCTCGACACGGCCTTAATACGACGTTTTTCG  
GCCTGCACGACGGCCCCGATCAG-  
TGAATTAGGTCAAGATACAGGGAACATGATGCTAATAGGTCAATTTATAGGCAAACCATCTCTGG  
CGAGCACGGTCTCGACAGCAATGGAGTGTATGTACTATTTTCAATTCCTCCTGCTTCTGTTGAG  
CTTGTAGGCTGAC-  
TCGATGGCCATTTAGCTACAACGGTACCTCCGAGCTCCAGCTCGAGCGTATGAGCGTCTACTTC  
AACGAGGCTTCCGGCAACAAGTACGTTCCCTCGTGCCGTCCTCGTCGATCTCGAGCCCGGTACC  
ATGGATGCCGTCCGCGCCGGTCCCTTCGGCCAGCTCTCCGCCCTGACAACCTTCGTCTTCGGTC



AGTCCGGTGCTGGCAACAACACTGG

>N\_phangngaensis\_MFLUCC\_18\_0119

ATTTATAGAGTTTTCTAAACTCCCAACCCATGTGAACTTACCTTTTGTTCCTCGGCAGAAGTTAT  
AGGTCTTCTTATAGCTGCTGCCGGTGGACCATTAAACTCTTGTTATTTTATGTAATCTGAGCGTCT  
TATTTTAATAAGTCAAAACTTTCAACAACGGATCTCTTGGTTCTGGCATCGATGAAGAACGCAGC  
GAAATGCGATAAGTAATGTGAATTGCAGAATTCAGTGAATCATCGAATCTTTGAACGCACATTG  
CGCCATTAGTATTCTAGTGGGCATGCCTGTTTCGAGCGTCATTTCAACCCTTAAGCCTAGCTTAG  
TGTTGGGAATCTACTTCTTTA--  
TAGTTGTAGTTCCTGAAATACAACGGCGGATTTGTAGTATCCTCTGAGCGTAGTAA-  
TTTTTTTCTCGCTTTTGTAGGTGCTATAACTCCCAGCCGCTAAACCCCAATTTTTTGT?????????  
?????????AGAAGTTAGTCATTTATTGATTCCCATCAT-----CATCCCCCTTCAC-  
TTCAGCATCATAATTTTCAACCTACGTGTTGAAAATTA-TTTTCGCTCCTTCCACAC--TTTT--  
TCGCTGGTTACCCCGCCGCGAGGCACCCGCACGACCCCGCGGTGCAAACGAAAAATTTCTTAT  
CACAGCCCCACCTTGCACAAGCAACCATGCATTGCTCATGAGACCCACT--  
TGAACAATTGCTAATGCCTTCATACAGGAAGCCGCCGAGCTCGGTAAGGGTTCCTTCAAGTACG  
CCTGGGTTCTTGACAAGCTCAAGGCCGAGCGTGAGCGTGGTATCACCATCGATATCGCTCTCTG  
GAAGTTCGAGACCAACGAGTACAATGTCCCCGTCATTGGTTAGTACCCCTCCACCTATGCCATG  
TGCTGCTCCATAAGACACTTGACTAACCTTGTTTCATAGACGCTCC-  
GGCCACCGTGATTTCTCAAGAACA??TTGTTTCCT-----CTG-----CTCGAC-CGGCCTT-  
ATACGACGTTTTACGTGCCTGCACGACGGCCCCGATCAG-  
TGAATTAGTCAAGATACAGGGAACATGATGCTAATAGGTCAATTTATAGGCAAACCATCTCTGG  
CGAGCACGGTCTCGACAGCAATGGAGTGTATGTACTATTTTCAATTCCTCCTGCTTCTGTTGAG  
CTTGTAGGCTGAC-  
TCGATGGCCATTTAGCTACAACGGTACCTCCGAGCTCCAGCTCGAGCGTATGAGCGTCTACTTC  
AACGAGGCTTCCGGCAACAAGTACGTTTCTCGTGCCGTCCTCGTCGATCTCGAGCCCGGTACCA  
TGGATGCCGTCCGCGCCGGTCCCTTCGGCCAGCTCTTCCGCCCTGACAACCTTCGTCTTCGGTCA  
GTCCGGTGCTGGCAACAACACTGG

>N\_piceana\_CBS\_394\_48

CATTATAGAGTTTTCTAAACTCCCAACCCATGTGAACTTACCTTTTGTTCCTCGGCAGGAGTTAT  
AGGTCTTCTTATAGCTGCTGCCGGTGGACCATTAAACTCTTGTTATTTTATGTAATCTGAGCGTCT  
TATTTTAATAAGTCAAAACTTTCAACAACGGATCTCTTGGTTCTGGCATCGATGAAGAACGCAGC  
GAAATGCGATAAGTAATGTGAATTGCAGAATTCAGTGAATCATCGAATCTTTGAACGCACATTG  
CGCCATTAGTATTCTAGTGGGCATGCCTGTTTCGAGCGTCATTTCAACCCTTAAGCCTAGCTTAG  
TGTTGGGAATCTACTTCTTTA--  
TAGTTGTAGTTCCTGAAATACAACGGCGGATTTGTAGTATCCTCTGAGCGTAGTAA-  
TTTTTTTCTCGCTTTTGTAGGTGCTATAACTCCCAGCCGCTAAACCCCAATTTTTTGTGGTTGAC  
CTCGGATCAGGTAGAAGTTAGTCATTTATTGATTCCCATCAT-----CATCCCCCTTCAC-  
TTCAGCATCATAATTTTCAACCTACGTGTTGAAAATTA-TTTTCGCTCCTTCCACAC--TTTTG--  
TCGCTGGTTACCCCGCCGCGAGGCACCCGCACGACCCCGCGGTGCAAACGAAAAATTTCTTAT  
CACAGCCCCACCTTGCACAAGCAACCATGCATTGCTCATGAGACCCACT--  
TGAACAATTGCTAATGCCTTCATACAGGAAGCCGCCGAGCTCGGTAAGGGTTCCTTCAAGTACG  
CCTGGGTTCTTGACAAGCTCAAGGCCGAGCGTGAGCGTGGTATCACCATCGATATCGCTCTCTG  
GAAGTTCGAGACCAACGAGTACAATGTACCCGTCATTGGTTAGTACCCCTCCACCTATGCCATG  
TGCTGCTCCATAAGACACTTGACTAACCTTGCTTCATAGACGCTCCCGGTACCCGTGATTTTCATC

AAGAACATGCTGCCTTCTGGTATGTAATCTGTCTGCCTCGACACGGCCTTAATACGACGTTTTTC  
GTGCCTGCACGACGGCCCCGATCAG-  
TGAATTAGGTCAAGATACAGGGAACATGATGCTAATAGGTCAATTTATAGGCAAACCATCTCTGG  
CGAGCACGGTCTCGACAGCAATGGAGTGTATGTAATTTTCAATTCCTCCTGCTTCTGTTGAG  
CTTGTAGGCTGAC-  
TCGATGGCCATTTAGCTACAACGGTACCTCCGAGCTCCAGCTCGAGCGTATGAGCGTCTACTTC  
AACGAGGCTTCCGGCAACAAGTACGTTCCCTCGTGCCGTCCTCGTGCATCTCGAGCCCCGGTACCA  
TGGATGCCGTCCGCGCCGGTCCCTTCGGCCAGCTCTTCGGCCCTGACAACCTTCGTCTTCGGTCA  
GTCCGGTGCTGGCAACAACCTG?

>N\_protearum\_CBS\_114178

CATTATAGAGTTTTCTAAACTCCCAACCCATGTGAACCTTACCTTTTGTTGCCTCGGCAGAAGTTAT  
AGGTCTTCTTATAGCTGCTGCCGGTGGACCATTAACTCTTGTATTTTATGTAATCTGAGCGTCT  
TATTTAATAAGTCAAACTTTCAACAACGGATCTCTTGGTTCTGGCATCGATGAAGAACGCAGC  
GAAATGCGATAAGTAATGTGAATTGCAGAATTCAGTGAATCATCGAATCTTTGAACGCACATTG  
CGCCATTAGTATTCTAGTGGGCATGCCTGTTTCGAGCGTCATTTCAACCCCTAAGCCTAGCTTAG  
TGTTGGGAATCTACTTCTTCTTAGGAGTTGTAGTTCCTGAAATACAACGGCGGATTTGTAGTATCC  
TCTGAGCGTAGTAA-

TTTTTTTCTCGCTTTTGTAGGTGCTATAACTCCCAGCCGCTAAACCCCAATTTTCTGTGGTTGA  
CCTCGGATCAGGT???????AGTCATTTATTGATTCCCATCAT-----CCCCCTCAC-

TTCAGCATCATAATTTCAACCTACGTGTTGAAAATTA-TTTTCGCTCCTTCCACAC-TTTTTT--

TCGCTGGTTACCCCGCCGCGAGGCACCCGCACGCCCGCGGTGCAAACGAAAAATTTCTTAT  
CACAGCCCCACCTTGCACAAGCAACCATGCATTGCTCATGAGACCCACTT--

TGAACAATTGCTAATGCCTTCATACAGGAAGCCGCGAGCTCGGTAAGGGTTCCTTCAAGTACG  
CCTGGGTTCTTGACAAGCTCAAGGCCGAGCGTGAGCGTGGTATCACCATCGATATCGCTCTCTG  
GAAGTTCGAGACCAACGAGTACAATGTCACCGTCATTGGTTAGTACCCCTCCACCTATGCCATG  
TGCTGCTCCATAAGACACTTGAATAACCTTGCTTCATAGACGCTCCCGGTACCCGTGATTTATC  
AAGAACATGCTGCCTTCTGGTATGTTACCTGTCTGCCTCGACACGGCCTTACTACGACGTTTTTC  
GTGCCTGCACGACGGCCCCGAAAAG-

TGAAATAGGTCAAGATAGAGGGAACATGATACTAATAGGTCAATTTATAGGCAAACCATCTCTGG  
CGAGCACGGTCTCGACAGCAATGGAGTGTATGTAATACTTCAATTCCTCCTGCTTCTGTTGAG  
TTTGTAGGCTGAC-

TCGATGGCCATTTAGCTACAACGGTACCTCCGAGCTCCAGCTCGAGCGTATGAGCGTCTACTTC  
AACGAGGCTTCCGGCAACAAGTACGTTCCCTCGTGCCGTCCTCGTGCATCTCGAGCCCCGGTACCA  
TGGATGCCGTCCGCGCCGGTCCCTTCGGCCAGCTCTTCGGCCCTGACAACCTTCGTCTTCGGTCA  
GTCCGGTGCTGGCAACAACCTGG

>N\_psidii\_FMB0028

CATTATAGAGTTTTCTAAACTCCCAACCCATGTGAACCTTACCTTTTGTTGCCTCGGCAGAAGTTAT  
AGGTCTTCTTATAGCTGCTGCCGGTGGACCATTAACTCTTGTATTTTATGTAATCTGAGCGTCT  
TATTTAATAAGTCAAACTTTCAACAACGGATCTCTTGGTTCTGGCATCGATGAAGAACGCAGC  
GAAATGCGATAAGTAATGTGAATTGCAGAATTCAGTGAATCATCGAATCTTTGAACGCACATTG  
CGCCATTAGTATTCTAGTGGGCATGCCTGTTTCGAGCGTCATTTCAACCCCTAAGCCTAGCTTAG  
TGTTGGGAATCTACTTCTTA--

TAGTTGTAGTTCCTGAAATACAACGGCGGATTTGTAGTATCCTCTGAGCGTAGTAA-

TTTTTTTCTCGCTTTTGTAGGTGCTATAACTCCCAGCCGCTAAACCCCAATTTTTTGTGGTTGA

CCTCGGATCAGGT????????????????????????????????????????????????????????????C-----  
-----TACGTGTTGAAAAATA-TTTTCGCTCCTTCCACAC--TTTTT---  
CGCTGGTTACCCCGCCGCGAGGCACCCGCACGACCCCGCGGCGCAAACGAAAAATTTCTTATC  
ACAGCCCCACCTTGCATAAGCAACCATGCATTGCTCATGAGATCCACTT--  
TGAACAATTGCTAATGCCTTCATACAGGAAGCCGCCGAGCTCGGTAAGGGTTCCTTCAAGTACG  
CCTGGGTTCTTGACAAGCTCAAGGCCGAGCGTGAGCGTGGTATCACCATCGATATCGCTCTCTG  
GAAGTTCGAGACCAACGAGTACAATGTCACCGTCATTGGTTAGTACCCCTCCACCTATGCCATG  
TGCTGCTGCATAAGACACTTGACTAACCTTGCTT????????????????????????????????????????TGCT  
GCCTTCTGGTATGTAACCTGTCTGCCTCGACACGGCCTTAATACGACGTTTTTCGTGCCTGCACG  
ACGGCCCCGAACAG-  
TGAATTAGGTCAAGATAGAGGGAACATGATGCTAATAGGTCATTGATAGGCAAACCATCTCTGG  
CGAGCACGGTCTCGACAGCAATGGAGTGTATGTACTATTTTTAATTCCTCCTGCTTCTGTTAAG  
CTTGTAGGCTGAC-  
TCGATGGCCATTTAGCTACAACGGTACCTCCGAGCTCCAGCTCGAGCGTATGAGCGTCTACTTC  
AACGAGGCTTCCGGCAACAAGTACGTTCCCTCGTGCCGTCCTCGTCGATCTCGAGCCCGGTACCA  
TGGATGCCGTCCGCGCCGGTCCCTTCGGCCAGCTCTCCGCCCTGACAACCTTCGTCTTCGGTCA  
GTCCGGTGCTGGCAACAACACTGG  
>N\_rhapidis\_GUCC21501  
CATTATAGAGTTTTCTAAACTCCCAACCCATGTGAACCTACCTTTTGTTGCCTCGGCAGAAAGTTAT  
AGGTCTTCTTATAGCTGCTGCCGGTGGACCATTAAACTCTTGTTATTTTATGTAATCTGAGCGTCT  
TATTTTAATAAGTCAAACTTTCAACAACGGATCTCTTGTTCTGGCATCGATGAAGAACGCAGC  
GAAATGCGATAAGTAATGTGAATTGCAGAATTCAGTGAATCATCGAATCTTTGAACGCACATTG  
CGCCATTAGTATTCTAGTGGGCATGCCTGTTTCGAGCGTCATTTCAACCCTTAAGCCTAGCTTAG  
TGTTGGGAATCTACTTCTCTTAGGAGTTGTAGTTCCTGAAATACAACGGCGGATTTGTAGTATCC  
TCTGAGCGTAGTAA-  
TTTTTTTCTCGCTTTTGTAGGTGCTATAACTCCCAGCCGCTAAACCCCAATTTTT-  
GTGGTTGACCTCGGATCAG??AGAAGGTTAGTCATTTATTGATTCCCATCAT-----  
CATCCCCCTTGAC-TTCAGCATCATAATTTTCAACCTACGTGTTGAAAATTA-  
TTTTCGCTCCTTCCACAC--TTTTT--  
TCGCTGGTTACCCCGCCGCGAGGCACCCGCACGACCCCGCGGTGCAAACGAAAAATTTCTTAT  
CACAGCCCCACCTTGCACAAGCAACCATGCATTGCTCATGAGACCCACTT--  
TGAACAATTGCTAATGCCTTCATACAGGAAGCCGCCGAGCTCGGTAAGGGTTCCTTCAAGTACG  
CCTGGGTTCTTGACAAGCTCAAGGCCGAGCGTGAGCGTGGTATCACCATCGATATCGCTCTCTG  
GAAGTTCGAGACCAACGAGTACAATGTCACCGTCATTGGTTAGTACCCCTCCGCCTATGCCATG  
TGCTGCTCCATAAGACACTTGACTAACCTTGCTTCATAGACGCTCCCGGTACCCGTGATTTTCATC  
AAGAACATGCTGCCTTCTGGTATGTAATCTGTCTGCCTCGACACGGCCTTAATACGACGTTTTTC  
GTGCCTGCACGACGGCCCCGATCAG-  
TGAATTAGGTCAAGATACAGGGAACATGATGCTAATAGGTCATTTATAGGCAAACCATCTCTGG  
CGAGCACGGTCTCGACAGCAATGGAGTGTATGTACTATTTTCAATTCCTCCTGCTTCTGTTGAG  
CTTGTAGGCTGAC-  
TCGATGGCCATTTAGCTACAACGGTACCTCCGAGCTCCAGCTCGAGCGTATGAGCGTCTACTTC  
AACGAGGCTTCCGGCAACAAGTACGTTCCCTCGTGCCGTCCTCGTCGATCTCGAGCCCGGTACCA  
TGGATGCCGTCCGCGCCGGTCCCTTCGGCCAGCTCTCCGCCCTGACAACCTTCGTCTTCGGTCA  
GTCCGGTGCTGGCAACAACACTGG

>N\_rhizophorae\_MFLUCC\_17\_1550

CATTATAGAGTTTTCTAAACTCCCAACCCATGTGAACTTACCTTTTGTTCCTCGGCAGAAAGTTAT  
AGGTCTTCTTATAGCTGCTGCCGGTGGACCATTAACTCTTGTATTTTATGTAATCTGAGCGTCT  
TATTTTAATAAGTCAAACTTTCAACAACGGATCTCTTGTTCTGGCATCGATGAAGAACGCAGC  
GAAATGCGATAAGTAATGTGAATTGCAGAATTCAGTGAATCATCGAATCTTTGAACGCACATTG  
CGCCATTAGTATTCTAGTGGGCATGCCTGTTTCGAGCGTCATTTCAACCCTTAAGCCTAGCTTAG  
TGTTGGGAATCTACTTCTTTA--  
TAGTTGTAGTTCCTGAAATACAACGGCGGATTTGTAGTATCCTCTGAGCGTAGTAA-  
TTTTTTTCTCGCTTTTGTAGGTGCTATAACTCCCAGCCGCTAAACCCCAATTTTTGTGGTTGAC  
CTCGGATCAGGT?????TTAGTCATTTATTGATTCCCATCAT-----CATCCCCCTTCAC-  
TTCAG---CATAATTTTCAACCTACGTGTTGAAAATTA-TTTTCGCTCCTCCACAC--TTTTT--  
TCGCTGGTTACCCCGCCGCGAGGCACCCGCACGACCCCGCGGTGCAAACGAAAAATTTCTTAT  
CACAGCCCCACCTTGCACAAGCAACCATGCATTGCTCATGAGACCCACTT--  
TGAACAATTGCTAATGCCTTCATACAGGAAGCCGCCGAGCTCGGTAAGGGTTCCTTCAAGTACG  
CCTGGGTTCTTGACAAGCTCAAGGCCGAGCGTGAGCGTGGTATCACCATCGATATCGCTCTCTG  
GAAGTTCGAGACCAACGAGTACAATGTCACCGTCATTGGTTAGTACCCCTCCACCTATGCCATG  
TGCTGCACCATGAGACACTTGACTAACCTTGCTTCATAGACGCTCCCGGTCACCGTGATTTATC  
AAG????TGCTGCCTTCTGGTATGTAATCTGTCTGCCTCGACACGGCCTTAATACGACGTTTTTCG  
GCCTGCACGACGGCCCCGATCAG-  
TGAATTAGGTCAAGATACAGGGAACATGATGCTAATAGGTCAATTTATAGGCAAACCATCTCTGG  
CGAGCACGGTCTCGACAGCAATGGAGTGTATGTAATTTTCAATTCCTCCTGCTTCTGTTGAG  
CTTGTAGGCTGAC-  
TCGATGGCCATTTAGCTACAACGGTACCTCCGAGCTCCAGCTCGAGCGTATGAGCGTCTACTTC  
AACGAGGCTTCCGGCAACAAGTACGTTCCCTCGTGCCGTCCTCGTCGATCTCGAGCCCGGTACCA  
TGGATGCCGTCCGCGCCGGTCCCTTCGGCCAGCTCTTCGGCCCTGACAACCTTCGTCTTCGGTCA  
GTCCGGTGCTGGCAACAACCTGG

>N\_rhododendri\_GUCC\_21504

CATTATAGAGTTTTCTAAACTCCCAACCCATGTGAACTTACCTTTTGTTCCTCGGCAGAAAGTTAT  
AGGTCTTCTTATAGCTGCTGCCGGTGGACCATTAACTCTTGTATTTTATGTAATCTGAGCGTCT  
TATTTTAATAAGTCAAACTTTCAACAACGGATCTCTTGTTCTGGCATCGATGAAGAACGCAGC  
GAAATGCGATAAGTAATGTGAATTGCAGAATTCAGTGAATCATCGAATCTTTGAACGCACATTG  
CGCCATTAGTATTCTAGTGGGCATGCCTGTTTCGAGCGTCATTTCAACCCTTAAGCCTAGCTTAG  
TGTTGGGAATCTACTTCTTTAGGAGTTGTAGTTCCTGAAATACAACGGCGGATTTGTAGTATCC  
TCTGAGCGTAGTAA-  
TTTTTTTCTCGCTTTTGTAGGTGCTATAACTCCCAGCCGCTAAACCCCAATTTTTTGTGG-  
TGACCTC-GATCAGTAAGAAGGTTAGTCATTTATTGATTCCCATCAT-----  
CATCCCCCTTCAC-TTCAGCATCATAATTTTCAACCTACATGTTGGAAAATTA-  
TTTTTCGCTCCTCCACAC--TTTTT--  
TCGCTGGTTACCCCGCCGCGAGGCACCCGCACGACCCCGCGGTGCAAACGAAAAATTTCTTAT  
CACAGCCCCACCTTGCACAAGCAACCATGCATTGCTCATGAGACCCACTTTGTGAACAATTGCT  
AATGCCTTCATACAGGAAGCCGCCGAGCTCGGTAAGGGTTCCTTCAAGTACGCCTGGGTTCTTG  
ACAAGCTCAAGGCCGAGCGTGAGCGTGGTATCACCATCGATATCGCTCTCTGGAAGTTGAGA  
CCAACGAGTACAATGTCACCGTCATTGGTTAGTATCACTCCACCTATGCCATGTGCTGCTCCATA  
AGACACTTGACTAACCTGCTTACAGACGCTCCCGGTCACCGTGATTTATCAAGAACATGCT

GCCTTCTGGTATGTTACCTGTCTGCCTCGACACGGCCTTACTACGACGTTTTTCGTGCCTGCACG  
ACGGCCCCGAACAG-  
TGAAATAGGTCAAGATAGAGGGAACATGATACTAATAGGTCAATTTATAGGCAAACCATCTCTGG  
CGAGCACGGTCTCGACAGCAATGGAGTGTATGTACTAACTTCAATTCCTCCTGCTTCCTGTTGAG  
TTTGTAGGCTGAC-  
TCGATGGCCATTTAGCTACAACGGTACCTCCGAGCTCCAGCTCGAGCGTATGAGCGTCTACTTC  
AACGAGGCTTCCGGCAACAAGTACGTTCCCTCGTGCCGTCCTCGTCGATCTCGAGCCCGGTACCA  
TGGATGCCGTCCGCGCCGGTCCCTTCGGCCAGCTCTTCGCCCTGACAACCTTCGTCTTCGGTCA  
GTCCGGTGCTGGCAACAACCTGG

>N\_rhododendricola\_KUN\_HKAS\_123204

CATTATAGAGTTTTCTAAACTCCCAACCCATGTGAACTTACCTTTTGTTGCCTCGGCAGGAGTTAT  
AGGTCTTCTTATAGCTGCTGCCGGTGGACCATTAACTCTTGTATTTTATGTAATCTGAGCGTCT  
TATTTTAATAAGTCAAACTTTCAACAACGGATCTCTGGTTCTGGCATCGATGAAGAACGCAGC  
GAAATGCGATAAGTAATGTGAATTGCAGAATTCAGTGAATCATCGAATCTTTGAACGCACATTG  
CGCCATTAGTATTCTAGTGGGCATGCCTGTTTCGAGCGTCATTTCAACCCTTAAGCCTAGCTTAG  
TGTTGGGAATCTACTTCTTTA--  
TAGTTGTAGTTCCTGAAATACAACGGCGGATTTGTAGTATCCTCTGAGCGTAGTAA-  
TTTTTTTCTCGTTTTGTTAGGTGCTATAACTCCCAGCCGCTAAACCCCAATTTTTTGTGGTTGAC  
CTCGGATCAGGT????????????ACTTGATGATTC--ATCAT-----TCCCTTAC-  
TTCAGCATCATAATTTCAACCTACATGTTGAAAATTA-TTTCGCTCCTTCCACAC--TTTT--  
TCGCTGGTTACCCCGCCGCGAGGCACCCGCACGACCCCGCGGTGCAAACGAAAAATTTCTTAT  
CACAGCCCCACCTTGCACAAGCAACCATGCATTGCTCATGAGACCCACTTTGTGAACAATTGCT  
AATGCCTT-

AGATAG????????????????????????????????????????????????????????????  
????????????????????????????????????????????????????????????????  
????????????????????????????????????????????????????????????????  
????????????????????????????????????????????????????????????????  
GTGTGT---  
CTGTCTG-CTCGACACGGCCTTACTACGACGTTTTTCGTGCCTGCACGACGGCCCCGAACAG-  
TGAAATAGGTCAAGATAGAGGGAACATGATACTAATAGGTCAATTTATAGGCAAACCATCTCTGG  
CGAGCACGGTCTCGACAGCAATGGAGTGTATGTACTAACTTCAATTCCTCCTGCTTCCTGTTGAG  
TTTGTAGGCTGAC-  
TCGATGGCCATTTAGCTACAACGGTACCTCCGAGCTCCAGCTCGAGCGTATGAGCGTCTACTTC  
AACGAGGCTTCCGGCAACAAGTACGTTCCCTCGTGCCGTCCTCGTCGATCTCGAGCCCGGTACCA  
TGGATGCCGTCCGCGCCGGTCCCTTCGGCCAGCTCTTCGCCCTGACAACCTTCGTCTTCGGTCA  
GTCCGGTGCTGGCAACAACCTGG

>N\_rosae\_CBS\_101057

CATTATAGAGTTTTCTAAACTCCCAACCCATGTGAACTTACCTTTTGTTGCCTCGGCAGGAGTTAT  
AGGTCTTCTTATAGCTGCTGCCGGTGGACCATTAACTCTTGTATTTTATGTAATCTGAGCGTCT  
TATTTTAATAAGTCAAACTTTCAACAACGGATCTCTGGTTCTGGCATCGATGAAGAACGCAGC  
GAAATGCGATAAGTAATGTGAATTGCAGAATTCAGTGAATCATCGAATCTTTGAACGCACATTG  
CGCCATTAGTATTCTAGTGGGCATGCCTGTTTCGAGCGTCATTTCAACCCTTAAGCCTAGCTTAG  
TGTTGGGAATCTACTTCTTTTATTAGTTGTAGTTCCTGAAATACAACGGCGGATTTGTAGTATCCT  
CTGAGCGTAGTAATTTTTTTTCTCGTTTTGTTAGGTGCTATAACTCCCAGCCGCTAAACCCCAA  
TTTTTTGTGGTTGACCTCGGATCAGGT??AAGGTTAGTCATTTATTGATTCCCGTCAT-----  
CATCCCCCTTAC-TTCAGCATCATAATTTTCAACCTACGTGTTGAAAATTA-

TTTTCGCTCCTTCCACAC--TTTT--  
TCGCTGGTTACCCCGCCGCGAGGCACCCGCACGACCCCGCGGTGCAAACGAAAAATTTCTTAT  
CACAGCCCCACCTTGCACAAGCAACCATGCATTGCTCATGAGACCCACTT--  
TGAACAATTGCTAATGCCTTCATACAGGAAGCCGCCGAGCTCGGTAAGGGTTCCTTCAAGTACG  
CCTGGGTTCTTGACAAGCTCAAGGCCGAGCGTGAGCGTGGTATCACCATCGATATCGCTCTCTG  
GAAGTTCGAGACCAACGAGTACAATGTCACCGTCATTGGTTAGTACCCCTCCACCTATGCCATG  
TGCTGCTCCATAAGACACTTGACTAACCTTGCTTCATAGACGCTCCCGGTCACCGTGATTTTCATC  
AAGAACATGCTGCCTTCTGGTATGTAACCTGTCTGTCTCGACACGGCCTCAATACGACGTTTTTC  
GTGCCTGCACGACGGCCCCGAACAG-  
TGAATTAGGTCAAGATAGAGGGAACATGATGCTAATAGGTCAATTGATAGGCAAACCATCTCTGG  
CGAGCACGGTCTCGACAGCAATGGAGTGTATGTAATTTTTAATTCCTCCTGCTTCTGTTAAG  
CTTGTAGGCTGAC-  
TCGATGGCCATTTAGCTACAACGGTACCTCCGAGCTCCAGCTCGAGCGTATGAGCGTCTACTTC  
AACGAGGCTTCCGGCAACAAGTACGTTCCCTCGTGCCGTCCTCGTCGATCTCGAGCCCGGTACCA  
TGGATGCCGTCCGCGCCGGTCCCTTCGGCCAGCTCTCCGCCCTGACAACCTTCGTCTTCGGTCA  
GTCCGGTGCTGGCAACAAC???

>N\_rosicola\_CFCC\_51992

CATTATAGAGTTTTCTAAACTCCCAACCCATGTGAACCTTACCTTTTGTTCCTCGGCAGAAAGTTAT  
AGGTCTTCTTATAGCTGCTGCCGGTGGACCATTAACTCTTGTATTTTATGTAATCTGAGCGTCT  
TATTTAATAAGTCAAACTTTCAACAACGGATCTCTTGGTTCTGGCATCGATGAAGAACGCAGC  
GAAATGCGATAAGTAATGTGAATTGCAGAATTCAGTGAATCATCGAATCTTTGAACGCACATTG  
CGCCATTAGTATTCTAGTGGGCATGCCTGTTTCGAGCGTCATTTCAACCCCTAAGCCTAGCTTAG  
TGTTGGGAATCTACTTCTTTTATTAGTTGTAGTTCCTGAAATACAACGGCGGATTTGTAGTATCCT  
CTGAGCGTAGTAA-

TTTTTTCTCGCTTTTGTGAGGTGCTATAACTCCCAGCCGCTAAACCCCAATTTTTTGTGGTTGA  
CCTCGGATCA??AGAAGGTTAGTCATTTATTGATTCCCATCAT-----CATCCCCCTTAC-  
TTCAGCATCATAATTTCAACCTACGTGTTGAAAATTA-TTTCGCTCCTTCCACAC--TTTT--  
TCGCTGGTTACCCCGCCGCGAGGCACCCGCACGACCCCGCGGTGCAAACGAAAAATTTCTTAT  
CACAGCCCCACCTTGCACAAGCAACCATGCATTGCTCATGAGACCCACTT--  
TGAACAATTGCTAATGCCTTCATACAGGAAGCCGCCGAGCTCGGTAAGGGTTCCTTCAAGTACG  
CCTGGGTTCTTGACAAGCTCAAGGCCGAGCGTGAGCGTGGTATCACCATCGATATCGCTCTCTG  
GAAGTTCGAGACCAACGAGTACAATGTCACCGTCATTGGTTAGTACCCCTCCACCTATGCCATG  
TGCTGCACCATAAGACACTTGACTAACCTTGCTTCATAGACGCTCCCGGTCACCGTGATTTTCATC  
AAGAACATGCTGCCTTCTGGTATGTAATCTGTCTGCCTCGACACGGCCTAATACGACGTTTTTC  
GTGCCTGCACGACGGCCCCGATCAG-

TGAATTAGGTCAAGATACAGGGAACATGATGCTAATAGGTCAATTATAGGCAAACCATCTCTGG  
CGAGCACGGTCTCGACAGCAATGGAGTGTATGTAATTTTTCAATTCCTCCTGCTTCTGTTGAG  
CTTGTAGGCTGAC-  
TCGATGGCCATTTAGCTACAACGGTACCTCCGAGCTCCAGCTCGAGCGTATGAGCGTCTACTTC  
AACGAGGCTTCCGGCAACAAGTACGTTCCCTCGTGCCGTCCTCGTCGATCTCGAGCCCGGTACCA  
TGGATGCCGTCCGCGCCGGTCCCTTCGGCCAGCTCTCCGCCCTGACAA?????????????????  
?????????????????

>N\_samarangensis\_MFLUCC\_12\_0233

CATTATAGAGTTTTCTAAACTCCCAACCCATGTGAACCTTACCTTTTGTTCCTCGGCAGAAAGTTAT

AGGTCTTCTTATAGCTGCTGCCGGTGGACCATTAAACTCTTGTTATTTTATGTAATCTGAGCGTCT  
TATTTTAATAAGTCAAACTTTCAACAACGGATCTCTTGGTTCTGGCATCGATGAAGAACGCAGC  
GAAATGCGATAAGTAATGTGAATTGCAGAATTCAGTGAATCATCGAATCTTTGAACGCACATTG  
CGCCATTAGTATTCTAGTGGGCATGCCTGTTTCGAGCGTCATTTCAACCCTTAAGCCTAGCTTAG  
TGTTGGGAATCTACTTCTTTA--  
TAGTTGTAGTTCCTGAAATACAACGGCGGATTTGTAGTATCCTCTGAGCGTAGTAA-  
TTTTTTTCTCGCTTTTGTAGGTGCTATAACTCCCAGCCGCTAAACCCCAATTTTTTGTGGTTGAC  
CTCGGATCAGGTAGAAGGTTAGTCATTTATTGATTCCCATCAT-----CATCCCCCTTGAC-  
TTCAGCATCATAATTTCAACCTACGTGTTGAAAATTA-TTTTCGCTCCTTCCACAC--TTTT--  
TCGCTGGTTACCCCGCCGCGAGGCACCCGCACGACCCCGCGGTGCAAACGAAAAATTTCTTAT  
CACAGCCCCACCTTGCACAAGCAACCATGCATTGCTCATGAGACCCACTT--  
TGAACAATTGCTAATGCCTTCATACAGGAAGCCGCCGAGCTCGGTAAGGGTTCCTTCAAGTACG  
CCTGGGTTCTTGACAAGCTCAAGGCCGAGCGTGAGCGTGGTATCACCATCGATATCGCTCTCTG  
GAAGTCGAGACCAACGAGTACAATGTCACCGTCATTGGTTAGTACCCCTCCGCCTATGCCATG  
TGCTGCTCCATAAGACACTTGACTAACCTTGCTTCATAGACGCTCCCGGTCACCGTGATTTTCATC  
AAGAACATGCTGCTTTCTGGTATGTAATCTGTCTGCCTCGACACGGCCTTAATACGACGTTTTTC  
GTGCCTGCACGACGGCCCCGATCAG-  
TGAATTAGGTCAAGATACAGGGAACATGATGCTAATAGGTCAATTTATAGGCAAACCATCTCTGG  
CGAGCACGGTCTCGACAGCAATGGAGTGTATGTACTATTTTCAATTCCTCCTGCTTCTGTTGAG  
CTTGTAGGCTGAC-  
TCGATGGCCATTTAGCTACAACGGTACCTCCGAGCTCCAGCTCGAGCGTATGAGCGTCTACTTC  
AACGAGGCTTCCGGCAACAAGTACGTCCCTCGTGCCGTCCTCGTCGATCTCGAGCCCGGTACC  
ATGGATGCCGTCGCGCCGGTCCCTTCGGCCAGCTCTTCCGCCCTGACAACTTCGTCTTCGGTC  
AGTCCGGTCTGGCAACAACCTGG  
>N\_saprophytica\_GUCC\_21506  
CATTATAGAGTTTTCTAAACTCCCAACCCATGTGAACCTACCTTTTGTTCCTCGGCAGAAGTTAT  
AGGTCTTCTTATAGCTGCTGCCGGTGGACCATTAAACTCTTGTTATTTTATGTAATCTGAGCGTCT  
TATTTTAATAAGTCAAACTTTCAACAACGGATCTCTTGGTTCTGGCATCGATGAAGAACGCAGC  
GAAATGCGATAAGTAATGTGAATTGCAGAATTCAGTGAATCATCGAATCTTTGAACGCACATTG  
CGCCATTAGTATTCTAGTGGGCATGCCTGTTTCGAGCGTCATTTCAACCCTTAAGCCTAGCTTAG  
TGTTGGGAATCTACTTCTTTAGGAGTTGTAGTTCCTGAAATACAACGGCGGATTTGTAGTATCC  
TCTGAGCGTAGTAA-  
TTTTTTTCTCGCTTTTGTAGGTGCTATAACTCCCAGCCGCTAAACCCCAATTTTTTGTGG-  
TGACCTCGGATCAGGTAGAAGGTTAGTCATTTATTGATTCCCATCAT-----  
CATCCCCCTTAC-TTCAGCATCATAATTTTCAACCTACATGTTGAAAATTA-  
TTTTTCGCTCCTTCCACAC--TTTT--  
TCGCTGGTTACCCCGCCGCGAGGCACCCGCACGACCCCGCGGTGCAAACGAAAAATTTCTTAT  
CACAGCCCCACCTTGCACAAGCAACCATGCATTGCTCATGAGACCCACTTTGTGAACAATTGCT  
AATGCCTTCATACAGGAAGCCGCCGAGCTCGGTAAGGGTTCCTTCAAGTACGCCTGGGTTCTTG  
ACAAGCTCAAGGCCGAGCGTGAGCGTGGTATCACCATCGATATCGCTCTCTGGAAGTTGAGA  
CCAACGAGTACAATGTCACCGTCATTGGTTAGTACCACTCCACCTATGCCATGTGCTGCTCCATA  
AGACACTTGACTAACCTGCTTCACAGACGCTCCCGGTCACCGTGATTTTCATCAAGAACATGCT  
GCCTTCTGGTATGTAACCTGTCTGTCTCGACACGGCCTCAATACGACGTTTTTTCGTGCCTGCACG  
ACAGCCCCGAACAG-

TGAATTAGGTCAAGATAGAGGGAACATGATGCTAATAGGTCATTGATAGGCAAACCATCTCTGG  
CGAGCACGGTCTCGACAGCAATGGAGTGTATGTACTATTTTCAATTCCTCCTGCTTCCTGTTGAG  
CTTGTAGGCTGAC-

TCGATGGCCATTTAGCTACAACGGTACCTCCGAGCTCCAGCTCGAGCGTATGAGTGTCTACTTC  
AACGAGGCTTCCGGCAACAAGTACGTTCCCTCGTGCCGTCCTCGTCGATCTCGAGCCCGGTACCA  
TGGATGCCGTCCGCGCCGGTCCCTTCGGCCAGCTCTTCGCCCTGACAACCTTCGTCTTCGGTCA  
GTCCGGTGCTGGCAACAACCTGG

>N\_saprophytica\_MFLUCC\_12\_0282

CATTATAGAGTTTTCTAAACTCCCAACCCATGTGAACTTACCTTTTGTTCCTCGGCAGAAGTTAT  
AGGTCTTCTTATAGCTGCTGCCGGTGGACCATTAACTCTTGTTATTTTATGTAATCTGAGCGTCT  
TATTTTAATAAGTCAAACTTTCAACAACGGATCTCTTGTTCTGGCATCGATGAAGAACGCAGC  
GAAATGCGATAAGTAATGTGAATTGCAGAATTCAGTGAATCATCGAATCTTTGAACGCACATTG  
CGCCATTAGTATTCTAGTGGGCATGCCTGTTTCGAGCGTCATTTCAACCCCTAAGCCTAGCTTAG  
TGTTGGGAATCTACTTCTCTTAGGAGTTGTAGTTCCTGAAATACAACGGCGGATTTGTAGTATCC  
TCTGAGCGTAGTAA-

TTTTTTCTCGTTTTGTTAGGTGCTATAACTCCCAGCCGCTAAACCCCAATTTTTGTGGTTGAC  
CTCGGATCAGGTAGAAGGTTAGTCATTTATTGATTCCCATCAT-----CATCCCCTTCAC-  
TTCAGCATCATAATTTCAACCTACGTGTTGAAAATTA-TTTTCGCTCCTTCCACAC--TTTT--  
TCGCTGGTTACCCCGCCGCGAGGCACCCGCACGACCCCGCGGTGCAAACGAAAAATTTCTTAT  
CACAGCCCCACCTTGCACAAGCAACCATGCATTGCTCATGAGACCCACTT--

TGAACAATTGCTAATGCCTTCACACAGGAAGCCGCGAGCTCGGTAAGGGTTCCTTCAAGTACG  
CCTGGGTTCTTGACAAGCTCAAGGCCGAGCGTGAGCGTGGTATCACCATCGATATCGCTCTCTG  
GAAGTTCGAGACCAACGAGTACAATGTCACCGTCATTGGTTAGTACCCCTCCACCTATGCCATG  
TGCTGCTCCATAAGACCTTGACTAACCTTGCTTCATAGACGCTCCCGGTACCCGTGATTTTCATC  
AAGAACATGCTGCCTTCTGGTATGTAACCTGTCTGTCTCGACACGGCCTCAATACGACGTTTTTC  
GTGCCTGCACGACAGCCCCGAACAG-

TGAATTAGGTCAAGATAGAGGGAACATGATGCTGATAGGTCATTGATAGGCAAACCATCTCTGG  
CGAGCACGGTCTCGACAGCAATGGAGTGTATGTACTATTTTCAATTCCTCCTGCTTCCTGTTGAG  
CTTGTAGGCTGAC-

TCGATGGCCATTTAGCTACAACGGTACCTCCGAGCTCCAGCTCGAGCGTATGAGTGTCTACTTC  
AACGAGGCTTCCGGCAACAAGTACGTTCCCTCGTGCCGTCCTCGTCGATCTCGAGCCCGGTACCA  
TGGATGCCGTCCGCGCCGGTCCCTTCGGCCAGCTCTTCGCCCTGACAACCTTCGTCTTCGGTCA  
GTCCGGTGCTGGCAACAACCTGG

>N\_sichuanensis\_CFCC\_54338

CATTATAGAGTTTTCTAAACTCCCAACCCATGTGAACTTACCTTTTGTTCCTCGGCAGAAGTTAT  
AGGTCTTCTTATAGCTGCTGCCGGTGGACCATTAACTCTTGTTATTTTATGTAATCTGAGCGTCT  
TATTTTAATAAGTCAAACTTTCAACAACGGATCTCTTGTTCTGGCATCGATGAAGAACGCAGC  
GAAATGCGATAAGTAATGTGAATTGCAGAATTCAGTGAATCATCGAATCTTTGAACGCACATTG  
CGCCATTAGTATTCTAGTGGGCATGCCTGTTTCGAGCGTCATTTCAACCCCTAAGCCTAGCTTAG  
TGTTGGGAATCTACTTCTCTTAGGAGTTGTAGTTCCTGAAATACAACGGCGGATTTGTAGTATCC  
TCTGAGCGTAGTAA-

TTTTTTCTCGTTTTGTTAGGTGCTATAACTCCCAGCCGCTAAACCCCAATTTTTGTGGTTGAC  
CTCGGATCAGGTAGAAGGTTAGTCATCTACTGATTCCCGTCAT-----CATTCTCCTTCAC-  
TTCAGCGTCATGATTTTCAACCTACGTGTTGAAAATTA-TTTTCGCTCCTTCCACAC--TTTT--



TCGCTGGTTACCCCGCCGCGAGGCACCCGCACGACCCCGCGGTGCAAGCGAAAAATTTCTTAT  
CACAGCCCCACCTTGCATAAGCAACCATGCATTGCTCATGAGATCCACTT--  
TGAACAATTGCTAATGCCTTCATACAGGAAGCCGCCGAGCTCGGTAAGGGTTCCTTCAAGTACG  
CCTGGGTTCTTGACAAGCTCAAGGCCGAGCGTGAGCGTGGTATCACCATCGATATCGCTCTCTG  
GAAGTTCGAGACCAACGAGTACAATGTCACCGTCATTGGTTAGTACCCCTCCACCTATGTCATG  
TGCTGCTCCATAAGACACTTGACTIONAACCTTGCTTCATAGACGCTCCCGGTACCCGTGATTTTCATC  
AAGAACATGCTGCCTTCTGGTATGTAATCTGTCTGCCTCGACACGGCCTAATACGACGTTTTTC  
GTGCCTGCACGACGGCCCCGATCAG-  
TGAATTAGGTCAAGATACAGGGAACATGATGCTAATAGGTCAATTTATAGGCAAACCATCTCTGG  
CGAGCACGGTCTCGACAGCAATGGAGTGTATGTACTIONTTTTCAATTCCTCCTGCTTCCTGTTGAG  
CTTGTAGGCTGAC-  
TCGATGGCCATTTAGCTACAACGGTACCTCCGAGCTCCAGCTCGAGCGTATGAGCGTCTACTTC  
AACGAGGCTTCCGGCAACAAGTACGTTCCCTCGTGCCGTCCTCGTCGATCTCGAGCCCCGGTACCA  
TGGATGCCGTCCGCGCCGGTCCCTTCGGCCAGCTCTTCGCCCTGACAACCTTCGCTTCGGTCA  
GTCCGGTGCTGGCAACAACCTGG

>N\_sichuanensis\_SM15\_1C

CATTATAGAGTTTTCTAAACTCCCAACCCATGTGACTIONACCTTTTGTTCCTCGGCAGAAAGTTAT  
AGGTCTTCTTATAGCTGCTGCCGGTGGACCATTAAACTCTTGTTATTTTATGTAATCTGAGCGTCT  
TATTTTAATAAGTCAAAACTTTCAACAACGGATCTCTTGGTTCTGGCATCGATGAAGAACGCAGC  
GAAATGCGATAAGTAATGTGAATTGCAGAATTCAGTGAATCATCGAATCTTTGAACGCACATTG  
CGCCATTAGTATTCTAGTGGGCATGCCTGTTTCGAGCGTCATTTCAACCCTTAAGCCTAGCTTAG  
TGTTGGGAATCTACTTCTCTTAGGAGTTGTAGTTCCTGAAATACAACGGCGGATTTGTAGTATCC  
TCTGAGCGTAGTAA-

TTTTTTTCTCGTTTTGTTAGGTGCTATAACTCCCAGCCGCTAAACCCCCAATTTTTTGTGGTTGAC  
CTCGGATCAGGTAGAAGGTTAGTCATCTACTGATTCCCCTCAT-----CATTCTCCTTCAC-  
TTCAGCGTCATGATTTTCAACCTACGTGTTGAAAATTA-TTTTCGCTCCTTCCACAC--TTTT--

TCGCTGGTTACCCCGCCGCGAGGCACCCGCACGACCCCGCGGTGCAAGCGAAAAATTTCTTAT  
CACAGCCCCACCTTGCATAAGCAACCATGCATTGCTCATGAGATCCACTT--

TGAACAATTGCTAATGCCTTCATACAGGAAGCCGCCGAGCTCGGTAAGGGTTCCTTCAAGTACG  
CCTGGGTTCTTGACAAGCTCAAGGCCGAGCGTGAGCGTGGTATCACCATCGATATCGCTCTCTG  
GAAGTTCGAGACCAACGAGTACAATGTCACCGTCATTGGTTAGTACCCCTCCACCTATGTCATG  
TGCTGCTCCATAAGACACTTGACTIONAACCTTGCTTCATAGACGCTCCCGGTACCCGTGATTTTCATC  
AAGAACATGCTGCCTTCTGGTATGTAATCTGTCTGCCTCGACACGGCCTAATACGACGTTTTTC  
GTGCCTGCACGACGGCCCCGATCAG-

TGAATTAGGTCAAGATACAGGGAACATGATGCTAATAGGTCAATTTATAGGCAAACCATCTCTGG  
CGAGCACGGTCTCGACAGCAATGGAGTGTATGTACTIONTTTTCAATTCCTCCTGCTTCCTGTTGAG  
CTTGTAGGCTGAC-

TCGATGGCCATTTAGCTACAACGGTACCTCCGAGCTCCAGCTCGAGCGTATGAGCGTCTACTTC  
AACGAGGCTTCCGGCAACAAGTACGTTCCCTCGTGCCGTCCTCGTCGATCTCGAGCCCCGGTACCA  
TGGATGCCGTCCGCGCCGGTCCCTTCGGCCAGCTCTTCGCCCTGACAACCTTCGCTTCGGTCA  
GTCCGGTGCTGGCAACAACCTGG

>N\_siciliana\_CBS\_149117

CATTATAGAGTTTTCTAAACTCCCAACCCATGTGACTIONACCTTTTGTTCCTCGGCAGAAAGTTAT  
AGGTCTTCTTATAGCTGCTGCCGGTGGACCATTAAACTCTTGTTATTTTATGTAATCTGAGCGTCT

TATTTAATAAGTCAAACTTTCAACAACGGATCTCTTGGTTCTGGCATCGATGAAGAACGCAGC  
GAAATGCGATAAGTAATGTGAATTGCAGAATTCAGTGAATCATCGAATCTTTGAACGCACATTG  
CGCCATTAGTATTCTAGTGGGCATGCCTGTTTCGAGCGTCATTTCAACCCCTAAGCCTAGCTTAG  
TGTTGGGAATCTACTTCTTTATTAGTTGTAGTTCCTGAAATACAACGGCGGATTTGTAGTATCCT  
CTGAGCGTAGTAA-

TTTTTTCTCGCTTTTGTAGGTGCTATAACTCCCAGCCGCTAAACCCCAATTTTTGTGGTTGAC  
CTCGGATCAGGT?????TTAGTCATCTGTTGATTCCATCAT-----CATTCCCTCAC-  
ATCAGCGTCATGATTTTCAACCTACGTGTTGAAAATTA-TTTTCGCTCCTTCCACAC--TTTTT--  
TCGCTGGTTACCCCGCCGCGAGGCACCCGCACGACCCCGCGGTGCAAACGAAAAATTTCTTAT  
CACAGCCCCACCTTGCACAAGCAACCATGCATTGCTCATGAGACCCACTT--  
TGAACAATTGCTAATGCCTTCATACAGGAAGCCGCCGAGCTCGGTAAGGGTTCCTTCAAGTACG  
CCTGGGTTCTTGACAAGCTCAAGGCCGAGCGTGAGCGTGGTATCACCATCGATATCGCTCTCTG  
GAAGTTCGAGACCAACGAGTACAATGTCACCGTCATTGGTTAGTACCCCTCCACCAATGCCATA  
TGCTGCTCCATAAGACACTTGACTAACCTCACTTCATAGACGCTCCCGGTCACCGTGATTTATC  
AAGAATGCTGCCTTCTGGTATGTAACCTGTCTGCCTCGACACGGCCTTGATACGACGTTTTTC  
GTGCCTGCACGACGGCCCCGAACAG-

TGAATTAGGTCAAGATAGAGGGAACATGATGCTAATAGGTCATTGATAGGCAAACCATCTCTGG  
CGAGCACGGTCTCGACAGCAATGGAGTGTATGTAATTTTCAATTCTCCTGCTTCTGTTGAG  
CTTGTAGGCTGAC-

TCGATGGCCATTTAGCTACAACGGTACCTCCGAGCTCCAGCTCGAGCGTATGAGCGTCTACTTC  
AACGAGGCTTCCGTAACAAGTACGTTCCCTCGTGCCGTCCTCGTCGATCTCGAGCCCGGTACCA  
TGGATGCCGTCCGCGCCGGTCCCTTCGGCCAGCTCTTCGCCCTGACAACCTTCGTCTTCGGTCA  
GTCCGGTGCTGGCAACAACCTGG

>N\_sonneratae\_MFLUCC\_17\_1745

CATTATAGAGTTTTCTAAACTCCCAACCCATGTGAACTTACCTTTTGTTCCTCGGCAGAAGTTAT  
AGGTCTTCTTATAGCTGCTGCCGGTGGACCATTAACTCTTGTATTTTATGTAATCTGAGCGTCT  
TATTTAATAAGTCAAACTTTCAACAACGGATCTCTTGGTTCTGGCATCGATGAAGAACGCAGC  
GAAATGCGATAAGTAATGTGAATTGCAGAATTCAGTGAATCATCGAATCTTTGAACGCACATTG  
CGCCATTAGTATTCTAGTGGGCATGCCTGTTTCGAGCGTCATTTCAACCCCTAAGCCTAGCTTAG  
TGTTGGGAATCTACTTCTTA--

TAGTTGTAGTTCCTGAAATACAACGGCGGATTTGTAGTATCCTCTGAGCGTAGTAA-  
TTTTTTCTCGCTTTTGTAGGTGCTATAACTCCCAGCCGCTAAACCCCAATTTTTGTGGTTGAC  
CTCGGATCAGGT?????TTAGTCATTTATTGATTCCCATCATCATCCCCATCCCCCTTAC-  
TTCAGCATCATAATTTTCAACCTACGTGTTGAAAATTA-TTTTCGCTCCTTCCACAC-TTTTTT--  
CCGCTGGTTACCCCGCCGCGAGGCACCCGCACGACCCCGCGGTGCAAACGAAAAATTTCTTAT  
CACAGCCCCACCTTGCACAAGCAACCATGCATTGCTCATGAGACCCACTT--  
TGAACAATCGCTAATGCCTTCATACAGGAAGCCGCCGAGCTCGGTAAGGGTTCCTTCAAGTACG  
CCTGGGTTCTTGACAAGCTCAAGGCCGAGCGTGAGCGTGGTATCACCATCGATATCGCTCTCTG  
GAAGTTCGAGACCAACGAGTACAATGTCACCGTCATTGGTTAGTACCCCTCCACCTATGCCATG  
TGCTGCTCCATAAGACACTTGACTAACCTTGCTTCATAGACGCTCCCGGTCACCGTGATTTATC  
AAG????TGCTGCCTTCTGGTATGTTACCTGTCTGCCTCGACACGGCCTTAATACGACGTTTTTCGT  
GCCTGCACGACGGCCCCGAACAGTTGAAATAGGTCAAGATAGAGGGAACATAATACTAATAGG  
TCATTTATAGGCAAACCATCTCTGGCGAGCACGGTCTCGACAGCAATGGAGTGTATGTAATAAC  
TTCAATTCTCCTGCTTCTGTTGAGCTTGTAGGCTGAC-

TCGATGGCCATTTAGCTACAACGGTACCTCCGAGCTCCAGCTCGAGCGTATGAGCGTCTACTTC  
AACGAGGCTTCCGGCAACAAGTACGTTCCCTCGTGCTGTCCCTCGTCGATCTCGAGCCCGGTACCA  
TGGATGCCGTCCGCGCCGGTCCCTTCGGCCAGCTCTCCGCCCTGACAACCTTCGTCTTCGGTCA  
GTCCGGTGCTGGCAACAACACTGG

>N\_steyaertii\_IMI\_192475

CATTATAGAGTTTTCTAAACTCCCAACCCATGTGAACTTACCTTTTGTTGCCTCGGCAGAAGTTAC  
AGGTTACCCTGTAGCTGCTGCCGGTGGACCACTAACTCTTGTTATTTTATGTAATCTGAGCGTC  
TTATTTTAATAAGTCAAACTTTCAACAACGGATCTCTGGTTCTGGCATCGATGAAGAACGCAG  
CGAAATGCGATAAGTAATGTGAATTGCAGAATTCAGTGAATCATCGAATCTTTGAACGCACATT  
GCGCCCATTAGTATTCTAGTGGGCATGCCTGTTTCGAGCGTCATTTCAACCCTTAAGCCTAGCTTA  
GTGTTGGGAATCTACTTCTTTTATTAGTTGTAGTTCCTGAAATACAACGGCGGATTTGTAGTATCC  
TCTGAGCGTAGTAA-

ATCTTTTCTCGCTTTTGTACAGGT????????????????????????????????????????????AG  
AAGGTTAGTCATCTACTGATTCCCATCAT-----

TTTCATTCCCCTTGAGCGTCATGATTTTCGACCTACCTGTTGAAAATTATTTTTCGCTCCTTCCACA  
T--TTTT--

TCGCTGGTTACCCCGCCGCGAGGCACCCGCACGACCCCGCGGTGCAAACGAAAAATTTCTAT  
CACAGCCCCACCTTGCATAAGCAACTATGCACTGCTCATGAGACCCACTT--TGAA-----

-----

CCGCCGAGCTCGGTAAGGGTTCCTTCAAGTACGCCTGGGTTCTTGACAAGCTCAAGGCCGAGC  
GTGAGCGTGGTATCACCATCGATATCGCTCTCTGGAAGTTCGAGACCAACGAGTACAATGTCAC  
CGTCATTGGTTAGTACCCTACCACCCATGCCATGTGCTGCTGAACAAGACAC-  
CGACTAACATTGCTCCACAGACGCTCCCGGTCACCGTGATTTTCATCAAGAACATGCTGCTTTCTG  
GTATGTAGCCTGTCTACCTGGACACGGTCTC-

ATACGACATTTTTCTGACTTCACGACGGCCTCGAATAG-

TTGATTGGGTCAAGATAGAGATAACATGATGCTAATGGGTCATTCATAGGCAAACCATCTCTGG  
CGAGCACGGTCTCGACAGCAATGGAGTGTATGTACCATTTTAAATTCCTTTTGCTTCTGTTGAG  
CTCGTAGGCTGAC-

TTGATGGCCATTTAGCTACAACGGCACCTCCGAGCTCCAGCTCGAGCGTATGAGCGTCTACTTC  
AACGAGGCTTCCGGCAACAAGTACGTTCCCTCGTGCCGTCTTGTCGATCTCGAGCCCGGTACCA  
TGGATGCCGTCCGCGCCGGTCCCTTCGGCCAGCTCTCCGCCCTGACAACCTTCGTCTTCGGTCA  
GTCCGGTGCTGGCAACAACACTGG

>N\_surinamensis\_CBS\_450\_74

CATTATAGAGTTTTCTAAACTCCCAACCCATGTGAACTTACCTTTTGTTGCCTCGGCAGAAGTTAT  
AGGCTTCTTATAGCTGCTGCCGGTGGACCACTAACTCTTGTTATTTTATGTAATCTGAGCGTCT  
TATTTTAATAAGTCAAACTTTCAACAACGGATCTCTGGTTCTGGCATCGATGAAGAACGCAGC  
GAAATGCGATAAGTAATGTGAATTGCAGAATTCAGTGAATCATCGAATCTTTGAACGCACATTG  
CGCCATTAGTATTCTAGTGGGCATGCCTGTTTCGAGCGTCATTTCAACCCTTAAGCCTAGCTTAG  
TGTTGGGAATCTACTTCTTTTATTAGTTGTAGTTCCTGAAATACAACGGCGGATTTGTAGTATCCT  
CTGAGCGTAGTAA-

TTTTTTTCTCGCTTTTGTAGGTGCTATAACTCCCAGCCGCTAAACCCCAATTTTTTGTGGTTGAC  
CTCGGATCAGGTAGAAGGTTAGTCATCTATTGATTCCCATCAT-----CATTCCCCTTCTC-

TTACAGCGTCATGATTTTCAACCTACGCGTTGAAAATTA-TTTTCGCTCCTTCCACAC--TTTTT--

TCGCTGGTTACCCCGCCGCGAGGCACCCGCACGACCCCGCGGTGCAAACGAAAAATTTCTTAT

CACAGCCCCACCTTTCACAAGCAACCATGCATTGCTCATGAGACCCACTT--  
TGAACGATTGCTAATGCCTTCATACAGGAAGCCGCCGAGCTCGGTAAGGGTTCCTTCAAGTACG  
CCTGGGTTCTTGACAAGCTCAAGGCCGAGCGTGAGCGTGGTATCACCATCGATATCGCTCTCTG  
GAAGTTCGAGACCAACGAGTACAATGTCACCGTCATTGGTTAGTACCCCTCCACCTATGCCATG  
TGCTGCTCCATAAGACACTTACTAACCTTGCTTCATAGACGCTCCCGGTCACCGTGATTTTCATC  
AAGAA??TGCTGCCTTCTGGTATGTTACCTGTCTGCCTCGACACGGCCTTACTACGACGTTTTTCG  
TGCCTGCACGACGGCCCCGAACAG-  
TGAATAGGTCAAGATAGAGGGAACATGATACTAATAGGTCAATTTATAGGCAAACCATCTCTGG  
CGAGCACGGTCTCGACAGCAATGGAGTGTATGTACTAACTTCAATTCCTCCTGCTTCCTGTTGAG  
TTTGTAGGCTGAC-  
TCGATGGCCATTTAGCTACAACGGTACCTCCGAGCTCCAGCTCGAGCGTATGAGCGTCTACTTC  
AACGAGGCTTCCGGCAACAAGTACGTTCCCTCGTGCCGTCCTCGTTCGATCTCGAGCCCCGGTACCA  
TGGATGCCGTCCGCGCCGGTCCCTTCGGCCAGCTCTCCGCCCTGACAACCTTCGTCTTCGGTCA  
GTCCGGTGCTGGCAACAAC???

>N\_thailandica\_MFLUCC\_17\_1730

CATTATAGAGTTTTCTAAACTCCCAACCCATGTGAACTTACCTTTTGTTCCTCGGCAGAAGTTAT  
AGGTCTTCTATAGCTGCTGCCGGTGGACCATTAAACTCTTGTATTTTATGTAATCTGAGCGTCT  
TATTTTAATAAGTCAAACTTTCAACAACGGATCTCTGGTTCTGGCATCGATGAAGAACGCAGC  
GAAATGCGATAAGTAATGTGAATTGCAGAATTCAGTGAATCATCGAATCTTTGAACGCACATTG  
CGCCATTAGTATTCTAGTGGGCATGCCTGTTTCGAGCGTCATTTCAACCCTTAAGCCTAGCTTAG  
TGTTGGGAATCTACTTCTTTA--

TAGTTGTAGTTCCTGAAATACAACGGCGGATTTGTAGTATCCTCTGAGCGTAGTAA-  
TTTTTTCTCGTTTTGTTAGGTGCTATAACTCCCAGCCGCTAAACCCCCAATTTTTTGTGGTTGAC  
CTCGGATCAGGT?????TTAGTCATTTATTGATTCATCATCATCCCCATCCCCCTTCAC-  
TTCAGCATCATAATTTTCAACCTACGTGTTGAAAATTA-TTTTCGCTCCTTCCACAC-TTTTTT--  
CCGCTGGTTACCCCGCCGCGAGGCACCCGCACGACCCCGCGGTGCAAACGAAAAATTTCTTAT  
CACAGCCCCACCTTGCACAAGCAACCATGCATTGCTCATGAGACCCACTT--

TGAACAATCGCTAATGCCTTCATACAGGAAGCCGCCGAGCTCGGTAAGGGTTCCTTCAAGTACG  
CCTGGGTTCTTGACAAGCTCAAGGCCGAGCGTGAGCGTGGTATCACCATCGATATCGCTCTCTG  
GAAGTTCGAGACCAACGAGTACAATGTCACCGTCATTGGTTAGTACCCCTCCACCTATGCCATG  
TGCTGCTCCATAAGACACTTACTAACCTTGCTTCATAGACGCTCCCGGTCACCGTGATTTTCATC  
AAG????TGCTGCCTTCTGGTATGTTACCTGTCTGCCTCGACACGGCCTTAATACGACGTTTTTCG  
GCCTGCACGACGGCCCCGAACAGTTGAAATAGGTCAAGATAGAGGGAACATAAGACTAATAGG  
TCATTTATAGGCAAACCATCTCTGGCGAGCACGGTCTCGACAGCAATGGAGTGTATGTACTAAC  
TTCAATTCCTCCTGCTTCCTGTTGAGCTTGAGGCTGAC-

TCGATGGCCATTTAGCTACAACGGTACCTCCGAGCTCCAGCTCGAGCGTATGAGCGTCTACTTC  
AACGAGGCTTCCGGCAACAAGTACGTTCCCTCGTGCTGTCCCTCGTTCGATCTCGAGCCCCGGTACCA  
TGGATGCCGTCCGCGCCGGTCCCTTCGGCCAGCTCTCCGCCCTGACAACCTTCGTCTTCGGTCA  
GTCCGGTGCTGGCAACAACCTGG

>N\_umbrinospora\_MFLUCC\_12\_0285

CATTATAGAGTTTTCTAAACTCCCAACCCATGTGAACTTACCTTTTGTTCCTCGGCAGAAGTTAT  
AGGTCTTCTTATAGCTGCTGCCGGTGGACCATTAAACTCTTGTATTTTATGTAATCTGAGCGTCT  
TATTTTAATAAGTCAAACTTTCAACAACGGATCTCTGGTTCTGGCATCGATGAAGAACGCAGC  
GAAATGCGATAAGTAATGTGAATTGCAGAATTCAGTGAATCATCGAATCTTTGAACGCACATTG

CGCCATTAGTATTCTAGTGGGCATGCCTGTTTCGAGCGTCATTTCAACCCTTAAGCCTAGCTTAG  
TGTTGGGAATCTACTTCTTTA--  
TAGTTGTAGTTCCTGAAATACAACGGCGGATTTGTAGTATCCTCTGAGCGTAGTAA-  
TTTTTTTCTCGCTTTTGTAGGTGCTATAACTCCCAGCCGCTAAACCCCAATTTTTTGTGGTTGAC  
CTCGGATCAGGTAGAAGGTTAGTCATCTACTGATTCCCCTCAT-----CATTCTCCTTCAC-  
TTCAGCGTCATGATTTTCAACCTACGTGTTGAAAATTA-TTTTCGCTCCTTCCACAC--TTTT--  
TCGCTGGTTACCCCGCCGCGAGGCACCCGCACGACCCCGCGGTGCAAACGAAAAATTTCTTAT  
CACAGCCCCACCTTGCATAAGCAACCATGCATTGCTCATGAGATCCACTT--  
TGAACAATCGCTAATGCCTTCATACAGGAAGCCGCGAGCTCGGTAAGGGTTCCTTCAAGTACG  
CCTGGGTTCTTGACAAGCTCAAGGCCGAGCGTGAGCGTGGTATCACCATCGATATCGCTCTCTG  
GAAGTTCGAGACCAACGAGTACAATGTCACCGTCATTGGTTAGTACCCCTCCACCTATGCCATG  
TGCTGCTCCATAAGACACTTGACTAACCTTGCTTTATAGACGCTCCCGGTCACCGTGATTTTCATC  
AAGAATGCTGCTTTCTGGTATGTAACCTGTCTG-CTCGAC-  
CGGCCTTGATACGACGTTTTTCGTGCCTGCACGACGGCCTCGAACAG-  
TGAAATAGGTCAAGATAGAGGGAACATAATACTAATAGGTCAATTTATAGGCAAACCATCTCTGG  
CGAGCACGGTCTCGACAGCAATGGAGTGTATGTAATACTCAATTCCTCCTGCTTCTGTTGAG  
CTTGTAGGCTGAC-  
TCGATGGCCATTTAGCTACAACGGTACCTCCGAGCTCCAGCTCGAGCGTATGAGCGTCTACTTC  
AACGAGGCTTCCGGCAACAAGTACGTTCCCTCGTGCCGTCCTCGTCGATCTCGAGCCCGGTACCA  
TGGATGCCGTCCGCGCCGGTCCCTTCGGCCAGCTCTCCGCCCTGACAACCTTCGTCTTCGGTCA  
GTCCGGTGCTGGCAACAACCTGG

>N\_vheenae\_BRIP\_72293a

CATTATAGAGTTTTCTAAACTCCCAACCCATGTGAACTTACCTTTTGTTCCTCGGCAGAAGTTAT  
AGGTCTTCTTATAGCTGCTGCCGGTGGACCATTAACTCTTGTATTTTATGTAATCTGAGCGTCT  
TATTTTAATAAGTCAAACTTTCAACAACGGATCTCTTGGTTCTGGCATCGATGAAGAACGCAGC  
GAAATGCGATAAGTAATGTGAATTGCAGAATTCAGTGAATCATCGAATCTTTGAACGCACATTG  
CGCCATTAGTATTCTAGTGGGCATGCCTGTTTCGAGCGTCATTTCAACCCTTAAGCCTAGCTTAG  
TGTTGGGAATCTACTTCTTTCGGAGTTGTAGTTCCTGAAATACAACGGCGGATTTGTAGTATCC  
TCTGAGCGTAGTAA-  
TTTTTTTCTCGCTTTTGTAGGTGCTATAACTCCCAGCCGCTAAACCCCAATTTTTTGTGGTTGAC  
CTCGGATCAGGTAGAAGGTTAGTCATCTACTGATTCCCCTCAT-CATTATCATTCTCCTTCAC-  
TTCAGCGTCATGATTTTCAACCTATGTGTTGAAAATTA-TTTTCGCTCCTTCCACAC--TTTT--  
TCGCTGGTTACCCCGCCGCGAGGCACCCGCACGACCCCGCGGTGCAAACGAAAAATTTCTTAT  
CACAGCCCCACCTTGCATAAGCAACCATGCATTGCTCATGAGATCCACTT--  
CGAACAATTGCTAATGCCTTCATACAGGAAGCCGCGAGCTCGGTAAGGGTTCCTTCAAGTACG  
CCTGGGTTCTTGACAAGCTCAAGGCCGAGCGTGAGCGTGGTATCACCATCGATATCGCTCTCTG  
GAAGTTCGAGACCAACGAGTACAATGTCACCGTCATTGGTTAGTACCCCTCCACCTATGCCATG  
TGCTGCTCCATAAGACACTTGACTAACCTTGCTTCATAGACGCTCCCGGTCACCGTGATTTTCATC  
AAGAACA?????TTTCTGGTATGTAATCTGTCTGCCTCGACACGGCCTTAATACGACGTTTTTCGT  
GCCTGCACGACGGCCCCGATCAG-  
TGAATTAGGTCAAGATACAGGGAACATGATGCTAATAGGTCAATTTATAGGCAAACCATCTCTGG  
CGAGCACGGTCTCGACAGCAATGGAGTGTATGTAATACTCAATTCCTCCTGCTTCTGTTGAG  
CTTGTAGGCTGAC-  
TCGATGGCCATTTAGCTACAACGGTACCTCCGAGCTCCAGCTCGAGCGTATGAGCGTCTACTTC





TCGCTGGTTACCCCGCCGCGAGGCACCCGCACGACCCCGCGGTGCAAACGAAAAATTTCTTAT  
CACAGCCCCACCTTGCACAAGCAACCATGCATTGCTCATGAGACCCACTT--  
TGAACAATTGCTAATGCCTTCATACAGGAAGCCGCCGAGCTCGGTAAGGGTTCCTTCAAGTACG  
CCTGGGTTCTTGACAAGCTCAAGGCCGAGCGTGAGCGTGGTATCACCATCGATATCGCTCTTTG  
GAAGTTCGAGACCAACGAGTACAATGTCACCGTCATTGGTTAGTACCCCTCCACCTATGCCATG  
TGCTGCACCATAAGACACTTGACTAACCTTGCTTCATAGACGCTCCCGGTCACCGTGATTTTCATC  
AAG????TGCTGCCTTCTGGTATGTTACCTGTCTGCCTCGACACGGCCTTACTACGACGTTTTTCGT  
GCCTGCACGACGGCCCCGAACAG-  
TGAAATAGGTCAAGATAGAGGGAACATGATACTAATAGGTCAATTTATAGGCAAACCATCTCTGG  
CGAGCACGGTCTCGACAGCAATGGAGTGTATGTAATACTCAATTCCTCCTGCTTCTGTTGAG  
TTTGTAGGCTGAC-  
TCGATGGCCATTTAGCTACAACGGTACCTCCGAGCTCCAGCTCGAGCGTATGAGCGTCTACTTC  
AACGAGGCTTCCGGCAACAAGTACGTTCCCTCGTGCCGTCCTCGTCGATCTCGAGCCCGGTACCA  
TGGATGCCGTCGCCGCCGGTCCCTTCGGCCAGCTCTTCGCCCTGACAACCTTCGCTTCCGGTCA  
GTCCGGTGCTGGCAACAACCTGG

>Neopestalotiopsis\_dendrobii\_MFLUCC\_14\_0132

CATTATAGAGTTTTCTAAACTCCCAACCCATGTGAACCTACCTTTTGTTCCTCGGCAGAAGTTAT  
AGGTCTTCTTATAGCTGCTGCCGGTGGACCATTAACTCTTGTTATTTTATGTAATCTGAGCGTCT  
TATTTTAATAAGTCAAACTTTCAACAACGGATCTCTTGGTTCTGGCATCGATGAAGAACGCAGC  
GAAATGCGATAAGTAATGTGAATTGCAGAATTCAGTGAATCATCGAATCTTTGAACGCACATTG  
CGCCATTAGTATTCTAGTGGGCATGCCTGTTTCGAGCGTCATTTCAACCCTTAAGCCTAGCTTAG  
TGTTGGGAATCTACTTCTCTTAGGAGTTGTAGTTCCTGAAATACAACGGCGGATTTGTAGTATCC  
TCTGAGCGTAGTAA-

TTTTTTTCTCGTTTTGTTAGGTGCTATAACTCCCAGCCGCTAAACCCCCAA????????????????  
????????AGAAGGTTAGTCATTTATTGATTCCCATCAT-----CATCCCCCTTCAC-  
TTCAGCATCATAATTTTAACTACGTGTTGAAAATTA-TTTTCGCTCCTTCCACAC--TTTT--  
TCGCTGGTTACCCCGCCGCGAGGCACCCGCACGACCCCGCGGTGCAAACGAAAAATTTCTTAT  
CACAGCCCCACCTTGCACAAGCAACCATGCATTGCTCATGAGACCCACTT--  
TGAACAATTGCTAATGCCTTCATACAGGAAGCCGCCGAGCTCGGTAAGGGTTCCTTC?????????  
????????????????????????????????????????????????????????????????  
????????????????????????????????????????????????????????????????  
????????????????????????????????????????????????????????????????  
????????????????????????????????????????????????????????????????  
????????????????????????????????????????????????????????????????  
????????????????????????????????????????????????????????????????  
????????????????????????????????????????????????????????????????  
????????????????????????????????????????????????????????????????  
????????

>Neopestalotiopsis\_sp1\_CFCC\_54337

CATTATAGAGTTTTCTAAACTCCCAACCCATGTGAACCTACCTTTTGTTCCTCGGCAGAAGTTAT  
AGGTCTTCTTATAGCTGCTGCCGGTGGACCATTAACTCTTGTTATTTTATGTAATCTGAGCGTCT  
TATTTTAATAAGTCAAACTTTCAACAACGGATCTCTTGGTTCTGGCATCGATGAAGAACGCAGC  
GAAATGCGATAAGTAATGTGAATTGCAGAATTCAGTGAATCATCGAATCTTTGAACGCACATTG  
CGCCATTAGTATTCTAGTGGGCATGCCTGTTTCGAGCGTCATTTCAACCCTTAAGCCTAGCTTAG  
TGTTGGGAATCTACTTCTCTTAGGAGTTGTAGTTCCTGAAATACAACGGCGGATTTGTAGTATCC



TCTGAGCGTAGTAA-  
TTTTTTTCTCGCTTTTGTAGGTGCTATAACTCCCAGCCGCTAAACCCCAATTTTTTGTGGTTGAC  
CTCGGATCAGGTAGAAGGTTAGTCATCTGTTGATTCTATCAT-----CATTCCCTTCAC-  
ATCAGCGTCATGATTTTCAACCTACGTGTTGAAAATTA-TTTTCGCTCCTTCCACAC--TTTTT--  
TCGCTGGTTACCCCGCCGCGAGGCACCCGCACGACCCCGCGGTGCAAACGAAAAATTTCTTAT  
CACAGCCCCACCTTGCACAAGCAACCATGCATTGCTCATGAGACCCACTT--  
TGAACAATTGCTAATGCCTTCATACAGGAAGCTGCCGAGCTCGGTAAGGGTTCCTTCAAGTACG  
CCTGGGTTCTTGACAAGCTCAAGGCCGAGCGTGAGCGTGGTATCACCATCGATATCGCTCTCTG  
GAAGTTGAGACCAACGAGTACAATGTCACCGTCATTGGTTAGTACCCCTCCACCAATGCCATA  
TGCTGCTCCATAAGACACTTGACTAACCTTACTTCATAGACGCTCCCGGTCACCGTGATTTTCATC  
AAGAACATGCTGCCTTCTGGTATGTAATCTGTCTGCCTCGACACGGCCTCAATACGACGTTTTTC  
GTGCCTGCACGACGGCCCCGATCAG-  
TGAATTAGGTCAAGATACAGGGAACATGACGCTAATAGGTCAATTTATAGGCAAACCATCTCTGG  
CGAGCACGGTCTCGACAGCAATGGAGTGTATGTACTATTTTCAATTCCTCCTGCTTCTGTTGAG  
CTTGTAGGCTGAC-  
TCGATGGCCATTTAGCTACAACGGTACCTCCGAGCTCCAGCTCGAGCGTATGAGCGTCTACTTC  
AACGAGGCTTCCGCAACAAGTACGTTCCCTCGTGCCGTCCTCGTGCATCTCGAGCCCGGTACCA  
TGGATGCCGTCGCGCCGGTCCCTTCGGCCAGCTCTCCGCCCTGACAACCTTCGTCTTCGG?????  
????????????????????

>Neopestalotiopsis\_sp1\_ZX12\_1

CATTATAGAGTTTTCTAAACTCCCAACCCATGTGAACCTTACCTTTTGTTCCTCGGCAGAAGTTAT  
AGGTCTTCTTATAGCTGCTGCCGGTGGACCATTAACTCTTGTATTTTATGTAATCTGAGCGTCT  
TATTTTAATAAGTCAAACCTTCAACAACGGATCTCTTGGTTCTGGCATCGATGAAGAACGCAGC  
GAAATGCGATAAGTAATGTGAATTGCAGAATTCAGTGAATCATCGAATCTTTGAACGCACATTG  
CGCCATTAGTATTCTAGTGGGCATGCCTGTTTCGAGCGTCATTTCAACCATTAGCCTAGCTTAG  
TGTTGGGAATCTACTTCTTAGGAGTTGTAGTTCCTGAAATACAACGGCGGATTTGTAGTATCC  
TCTGAGCGTAGTAA-

TTTTTTTCTCGCTTTTGTAGGTGCTATAACTCCCAGCCGCTAAACCCCAATTTTTTGTGGTTGAC  
CTCGGATCAGGTAGAAGGTTAGTCATCTGTTGATTCTATCAT-----CATTCCCTTCAC-  
ATCAGCGTCATGATTTTCAACCTACGTGTTGAAAATTA-TTTTCGCTCCTTCCACAC--TTTTT--  
TCGCTGGTTACCCCGCCGCGAGGCACCCGCACGACCCCGCGGTGCAAACGAAAAATTTCTTAT  
CACAGCCCCACCTTGCACAAGCAACCATGCATTGCTCATGAGACCCACTT--  
TGAACAATTGCTAATGCCTTCATACAGGAAGCTGCCGAGCTCGGTAAGGGTTCCTTCAAGTACG  
CCTGGGTTCTTGACAAGCTCAAGGCCGAGCGTGAGCGTGGTATCACCATCGATATCGCTCTCTG  
GAAGTTGAGACCAACGAGTACAATGTCACCGTCATTGGTTAGTACCCCTCCACCAATGCCATA  
TGCTGCTCCATAAGACACTTGACTAACCTTACTTCATAGACGCTCCCGGTCACCGTGATTTTCATC  
AAGAACA????????????????????????????????????????????????????????????  
????????????????????????????????????????????????????????????????  
????????????????????????????????????????????????????????????????  
????????????????????????????????????????????????????????????????  
????????????????????????????????????????????????????????????????  
????????????????????????????????????????????????????????????????  
??

>Neopestalotiopsis\_sp2\_CFCC\_54340

CATTATAGAGTTTTCTAAACTCCCAACCCATGTGAACCTTACCTTTTGTTCCTCGGCAGAAGTTAT

AGGTCTTCTTATAGCTGCTGCCGGTGGACCATTCAACTCTTGTTATTTTATGTAATCTGAGCGTCT  
TATTTTAATAAGTCAAACTTTCAACAACGGATCTCTTGGTTCTGGCATCGATGAAGAACGCAGC  
GAAATGCGATAAGTAATGTGAATTGCAGAATTCAGTGAATCATCGAATCTTTGAACGCACATTG  
CGCCATTAGTATTCTAGTGGGCATGCCTGTTGAGCGTCATTTCAACCCTTAAGCCTAGCTTAG  
TGTTGGGAATCTACTTCTCTTAGGAGTTGTAGTTCCTGAAATACAACGGCGGATTTGTAGTATCC  
TCTGAGCGTAGTAA-

TTTTTTTCTCGCTTTTGTAGGTGCTATAACTCCCAGCCGCTAAACCCCAATTTTTTGTGGTTGAC  
CTCGGATCAGGTAGAAGGTTAGTCATTTATTGATTCCCATCAT-----TCCCCTCAC-  
TTCAGCATCATAATTTCAACCTACATGTTGAAAATTA-TTTTCGCTCCTTCCACAC--TTTT--  
TCGCTGGTTACCCCGCCGCGAGGCACCCGCACGACCCCGCGGTGCAAACGAAAAATTTCTTAT  
CACAGCCCCACCTTGCACAAGCAACCATGCATTGCTCATGAGACCCACTTTGTGAACAATTGCT  
AATGCCTT-

ATATAGGAAGCCGCGGAGCTCGGTAAGGGTTCCTTCAAGTACGCCTGGGTTCTTGACAAGCTCA  
AGGCCGAGCGTGAGCGTGGTATCACCATCGATATCGCTCTCTGGAAGTTCGAGACCAACGAGT  
ACAATGTCACCGTCATTGGTTAGTACCACTCCACCTATGCCATGTGCTGCTCCATAAGACACTTG  
ACTAACCTGCTTACAGACGCTCCCGGTCACCGTGATTTTCATCAAGAACATGCTGCCTTCTGGT  
ATGTAATCTGTCTGCCTCGACACGGCCTTAATACGACGTTTTTCGTGCCTGCACGACGGCCCCG  
ATCAG-

TGAATTAGGTCAAGATACAGGGAACATGATGCTAATAGGTCAATTTATAGGCAAACCATCTCTGG  
CGAGCACGGTCTCGACAGCAATGGAGTGTATGTAATTTTCAATTCCTCCTGCTTCTGTTGAG  
CTTGTAGGCTGAC-

TCGATGGCCATTTAGCTACAACGGTACCTCCGAGCTCCAGCTCGAGCGTATGAGCGTCTACTTC  
AACGAGGCTTCCGGCAACAAGTACGTTTCTCGTGCCGTCCTCGTGCATCTCGAGCCCGGTACCA  
TGGATGCCGTCCGCGCCGGTCCCTTCGGCCAGCTCTTCGCCCTGACAACCTTCGTCTTCGG?????  
????????????????????

>Neopestalotopsis\_sp2\_ZX22B

CATTATAGAGTTTTCTAAACTCCCAACCCATGTGAACCTTACCTTTTGTTCCTCGGCAGAAAGTTAT  
AGGTCTTCTTATAGCTGCTGCCGGTGGACCATTAAACTCTTGTTATTTTATGTAATCTGAGCGTCT  
TATTTTAATAAGTCAAACTTTCAACAACGGATCTCTTGGTTCTGGCATCGATGAAGAACGCAGC  
GAAATGCGATAAGTAATGTGAATTGCAGAATTCAGTGAATCATC-AATCTTTGAACG-  
ACATTGC-CCCATTA-

TATTCTAGTGGGCATGCCTGTTGAGCGTCATTTCAACCCTTAAGCCTAGCTTAGTGTGGGAAT  
CTACTTCTTTAGGAGTTGTAGTTCCTGAAATACAACGGCGGATTTGTAGTATCCTCTGAGCGTA  
GTAA-

TTTTTTTCTCGCTTTTGTAAAGTGTATAACTCCCAGCCGCTAAACCCCAATTTTTTGTGGTTGAC  
CTCGGATCAGGTAGAAGGTTAGTCATTTATTGATTCCCATCAT-----CATCCCCCTCAC-  
TTCAGCATCATAATTTCAACCTACATGTTGAAAATTA-TTTTCGCTCCTTCCACAC--TTTT--  
TCGCTGGTTACCCCGCCGCGAGGCACCCGCACGACCCCGCGGTGCAAACGAAAAATTTCTTAT  
CACAGCCCCACCTTGCACAAGCAACCATGCATTGCTCATGAGACCCACTTTGTGAACAATTGCT  
AATGCCTTCATACAGGAAGCCGCGGAGCTCGGTAAGGGTTCCTTCAAGTACGCCTGGGTTCTTG  
ACAAGCTCAAGGCCGAGCGTGAGCGTGGTATCACCATCGATATCGCTCTCTGGAAGTTCGAGA  
CCAACGAGTACAATGTCACCGTCATTGGTTAGTACCACTCCACCTATGCCATGTGCTGCTCCATA  
AGACACTTGACTAACCTGCTTACAGACGCTCCCGGTCACCGTGATTTTCATCAAGAACATGCT  
GCCTTCTGGTATGTAATCTGTCTGCCTCGACACGGCCTTAATACGACGTTTTTCGTGCCTGCACG

ACGGCCCCGATCAG-  
TGAATTAGGTCAAGATACAGGGAACATGATGCTAATAGGTCATTTATAGGCAAACCATCTCTGG  
CGAGCACGGTCTCGACAGCAATGGAGTGTATGACTATTTTCAATTCCTCCTGCTTCTGTTGAG  
CTTGTAGGCTGAC-  
TCGATGGCCATTTAGCTACAACGGTACCTCCGAGCTCCAGCTCGAGCGTATGAGCGTCTACTTC  
AACGAGGCTTCCGGCAACAAGTACGTTCCCTCGTGCCGTCCCTCGTGCATCTCGAGCCCCGGTACCA  
TGGATGCCGTCCGCGCCGGTCCCTTCGGCCAGCTCTTCGCCCTGACAACCTTCGTCTTCGGTCA  
GTCCGGTGCTGGCAACAACCTGG

>P\_diversiseta\_MFLUCC\_12\_0287

CATTATAGAGTTTTTAAACTCCCAACCCATGTGAACTTACC-  
ATTGTTGCCTCGGCAGAGGCTACGGCTTACCCTGTAGCGGCTGCCGGTGGACTACTAAACTCTT  
GTTATTTTATGTAATCTGAGCGTCTTATTTTAATAAGTCAAACTTTCAACAACGGATCTCTTGGTT  
CTGGCATCGATGAAGAACGCAGCGAAATGCGATAAGTAATGTGAATTGCAGAATTCAGTGAAT  
CATCGAATCTTTGAACGCACATTGCGCCCATTAGTATTCTAGTGGGCATGCCTGTTCCGAGCGTCA  
TTTCAACCCTTAAGCCTAGCTTAGTGTTGGGAGTCTACTGCTTTTACTAGCTGTAGCTCCTGAAAT  
ACAACGGCGGATCTGCGATATCCTCTGAGCGTAGTAA-  
TTTTTTTCTCGTTTTGACTGGAGTTGCAGCGTCTAGCCGCTAAACCCCAATTTTTAATGGTTGA  
CCTCGGATCAGGTAGAAGGTTAGTCATCCTCACAATCCCATCAT-----  
CATCTTCATCACCATCA-CCTCACCATTTTCAAC-TCAGTGCCGAAAATCA-  
GTTTCGCACCCGCCACA---TTCCAGACAC---TTACCCCGCCGCGTGCC---  
CGCACGACCCCGCGGTGCAAACGAAAAATTTCTTATCA--  
GCCCCACATCACACAAGCGGCCATGCACTTTTTCGT--AACCCACAA--  
TGAGCAATTGCTGACCCTGCCAATAGGAAGCCGCCGAGCTCGGAAAGGGTTCCTTCAAGTAC  
GCATGGGTTCTTGACAAGCTCAAGGCCGAGCGTGAGCGTGGTATCACCATCGATATCGCTCTCT  
GGAAGTTCGAGACCAACGAGTACAATGTCACCGTCATTGGTCAGTATCCCTGCCACAAGCTCT  
CTCATGGATCCGAACCTCAT---  
ACTAACATCGCAATATAGATGCTCCCGGTACCCGTGATTTTCATCAAGAACATGCTGCTTTCTGGT  
ATGTAGCCCATCTACCTCGATACGGCCTCAATACGACGCCTCCCGCAACTCAACAACGACCTCA  
ACTAC-TTGGTTGGAACCAAACGAAAG--  
ACTTGATACTGACCCGTCTCTGATAGGCAAACCATCTCTGGCGAGCACGGCCTCGACAGCAATG  
GAGTGTACGTATCCGTTCCCTGGCTACTTGCTTTCCACGAACATGCTAGCTGACATCCGTGGTT  
GTTTCAGCTACAACGGTACCTCCGAGCTCCAGCTCGAGCGCATGAGCGTCTACTTCAACGAGGCT  
TCCGGCAACAAGTACGTTCCCTCGTGCCGTCCCTCGTGCATCTCGAGCCCCGGTACCATGGATGCCG  
TCCGCGCCGGTCCCTTCGGTCACTCTTCGCCCTGACAACCTTCGTCTTCGGTCACTCCGGTGCC  
GGAAACAACCTGG

>P\_spathulata\_CBS\_356\_86

CATTATAGAGTTTTTCTAAACTCCCAACCCATGTGAACTTACC-  
ACTGTTGCCTCGGCAGAAGCTACGGCTTACCCTGTAGCGGCTGCCGGTGGACTACTAAACTCTT  
GTTATTTTATGTAATCTGAGCGTCTTATTTTAATAAGTCAAACTTTCAACAACGGATCTCTTGGTT  
CTGGCATCGATGAAGAACGCAGCGAAATGCGATAAGTAATGTGAATTGCAGAATTCAGTGAAT  
CATCGAATCTTTGAACGCACATTGCGCCCATTAGTATTCTAGTGGGCATGCCTGTTCCGAGCGTCA  
TTTCAACCCTTAAGCCTAGCTTAGTGTTGGGAGCCTACGGCTTTTACTAGCTGTAGCTCCTGAAA  
TACAACGGCGGATCTGCGATATCCTCTGAGCGTAGTAATTTTTTTCTCGTTTTGACTGGAGTTG  
CAGCGTCTAGCCGCTAAACCCCAATTTTTAATGGTTGACCTCGGATCAGGTAGAAGGTTAGTC

ATCCTCACGATCCCAACAT-----CATCACCATCACTATCA-CCTTACCATTTTCAAC-  
TCGGTGCCGAAAATCAGTTTTCGCGCTGCCACA---TTCCCAGACAC---  
TTACCCCGCCGCGTGGC---CGCACGACCCCGCGGTGCAAACGAAAAATTTCTTATCA--  
GCCCCACATCGCACAAACAGCCATGCACTTTTCAC--AATCCACAA--  
TGAGCAATTGCTGACCCCGCCAAATAGGAAGCCGCGAGCTCGGTAAGGGTTCCTTCAAGTAC  
GCATGGGTTCTTGACAAGCTCAAGGCCGAGCGGAGCGTGGTATCACCATCGATATCGCTCTCT  
GGAAGTTCGAGACCAACGAGTACAATGTCACCGTCATTGGTCAGTATCCCTGTCCACCAGCTGT  
TTCATGCATCCGAACCTCGC---  
ACTAACATGGCAATATAGATGCTCCCGGTCACCGTGATTTTCATCAAGAACATGCTGCCTTCTGGT  
ATGTAGCCTATCTACCTCGACACG-  
CCTCAATACGACGCCCCCGCAACTCGACGCCGACCTCAACTAC-  
TTGGTTGGATCCAAACGGAAG--ACTTGATACTGACC-GTCTC--  
ATAGGCAAACCATCTCTGGCGAGCACGGTCTCGACAGCAATGGAGTGTACGTGCCCTTTCTTG  
GCTACTTGCTTTCCACGAACATACTAGCTAACCTCGTGGTTGTTGAGCTACAACGGTACCTCC  
GAGCTCCAGCTCGAGCGCATGAGCGTCTACTTCAACGAGGCTTCTGGCAACAAGTACGTTCTCT  
GTGCCGTCTTGTGATCTCGAGCCCGAACCATGGATGCCGTCCGCGCCGGTCTTTTCGGTCA  
GCTCTTCGCCCTGACAACCTTCGTCTTCGGCCAGTCCGGTGCCGAAACAACCTGG  
>TN01  
??????GAGTTTTCTAAACTCCCAACCCATGTGAACTTACCTTTTGTGCCTCGGCAGAAGTTATA  
GGTCTTCTTATAGCTGCTGCCGGTGGACCATTAAACTCTTGTATTTTATGTAATCTGAGCGTCTT  
ATTTTAATAAGTCAAACCTTTCAACAACGGATCTCTTGGTTCTGGCATCGATGAAGAACGCAGCG  
AAATGCGATAAGTAATGTGAATTGCAGAATTCAGTGAATCATCGAATCTTTGAACGCACATTGC  
GCCATTAGTATTCTAGTGGGCATGCCTGTTGAGCGTCATTTCAACCCTAAGCCTAGCTTAGT  
GTTGGGAATCTACTTCTTTCATTAGTTGTAGTTCTGAAATACAACGGCGGATTTGTAGTATCCTC  
TGAGCGTAGTAA-  
TTTTTTCTCGTTTTGTTAGGTGCTATAACTCCCAGCCGCTAAACCCCAACTTTTTGTGGTTGA  
CCTCGGATCAGGTAGAAGGTTAGTCATTTATTGATTCCCGCCAT-----CATCCCCCTTAC-  
TTCAGCATCATAATTTTCAACCTACGTGTTGAAAATTA-TTTTAGCTCCTTCCACAC--TTTT--  
TCGCTGGTTACCCCGCCGCGAGGCACCCGCACGACCCCGCGGTGCAAACGAAAAATTTCTTAT  
CACAGCCCCACCTTGCACAAGCAACCATGCATTGCTCATGAGACCCACTT--  
TGAACAATTGCTAATGCCTTCATACAGGAAGCCGCCGAGCTCGGTAAGGGTTCCTTCAAGTACG  
CCTGGGTTCTTGACAAGCTCAAGGCCGAGCGTGAGCGTGGTATCACCATCGATATCGCTCTCTG  
GAAGTTCGAGACCAACGAGTACAATGTCACCGTCATTGGTTAGTACCCCTCCACCTATGTCATG  
TGCTGCTCCATAAGAC--  
TTGACTAACCTTGCTTCATAGACGCTCCCGGTCACC????????????????????TGCTGCCTTCTGGTAT  
GTAACCTGTCTGCCTCGACACGGCCTTAATACGACGTTTTTCGTGCCTGCACGACGGCCCCGAA  
CAG-  
TGATATAGGTCAAGATAGAGGGAACATGATGCTAATAGGTCATTGATAGGCAAACCATCTCTGG  
CGAGCACGGTCTCGACAGCAATGGAGTGTATGTAATTTTAAATTCCTCCTGCTCCTGTTAAG  
CTTGTAGGCTGAC-  
TCGATGGCCATTTAGCTACAACGGTACCTCCGAGCTCCAGCTCGAGCGTATGAGCGTCTACTTC  
AACGAGGCTTCCGGCAACAAGTACGTTCTCGTGCCGTCTCGTATCTCGAGCCCGGTACCA  
TGGATGCCGTCCGCGCCGGTCCCTTCGGCCAGCT????????????????????????????????  
??????????

*Pestalotiopsis* alignment

>E33

AGGGATCATTATAGAGTTTTTAAACTCCCAACCCATGTGAACTTACC-  
ATTGTTGCCTCGGCAGAAGCTACCTGGT--  
TACCTTACCTTGAACGGCCTACCCTGTAGCGCCTTACCCTGGAACGGCCTACCCTGTAACGGC  
TGCCGGTGGACTACCAAACCTTTGTTATTTTATTGTAATCTGAGCGTCTTATTTAATAAGTCAA  
ACTTTCAACAACGGATCTCTTGGTTCTGGCATCGATGAAGAACGCAGCGAAATGCGATAAGTAA  
TGTGAATTGCAGAATTCAGTGAATCATCGAATCTTTGAACGCACATTGCGCCCATTAGTATTCTA  
GTGGGCATGCCTGTTGAGCGTCATTTCAACCCTTAAGCCTAGCTTAGTGTGGGAGCCTACTG-  
-CTTTTGCTAGCGGTAGCTCCTGAAATACAACGGCGGATCTGCGATATCCTCTGAGCGTAGTAA-  
TTTTTATCTCGTTTTGACTGGAGTTGCAGCGTCTTAGCCGCTAAACCCCC-AA-  
TTTTTAATGGTTGACCTC????????????????????CC-ATCATTC-----CCATC-----  
CTCATCATCATCGCCT--CGCAA----CA-TTTTCCAACC-GGTGCCGAGAATCT-G-----  
TTTTCGCATCTGCC-CATTTTCCAG--ACACTTACCC-----  
GCCGCACGACCCCGCGGTGCAAACGAAAAAATTCTTA--  
TCACAGCCCCACATCGCACAAACATTTTGGCAGCCATGCACTTTCCAAGACCCACAATGAACAT  
TTGCTGACCCCGCAAATAGGAAGCCGCCGAGCTCGGAAAGGGTTCCTTCAAGTACGCATGGG  
TTCTTGACAAGCTCAAGGCCGAGCGTGAGCGTGGTATCACCATCGATATCGCTCTCTGGAAGTT  
CGAGACCAACGAGTACAATGTCACCGTCATTGGTTAGTATCCCTGTCCACACGATGTACTATGC  
ATCTGAATGT-  
ATACTAACATGGCAACACAGATGCTCCCGGTACCGTGATTTTCATCAATGCTGCCTTTTGGTATG  
TAGCC-CATCTACCTCGACAC-GCCTCAATACGACAACCCCGCAACTCGACAAC--  
GACGTTCTCAACAAGTGCTTGCTTGGAAACAAGGGAAAGACTTGATACTGACCGGTCCCTGATA  
GGCAAACCATCTCTGGCGAGCACGGTCTCGACAGCAATGGAGTGTACGTACCCTTTCTTGGCT  
ACTTGCTTTCCACGAACATCTCAGCTAACACTCG-  
TGGTTGTTGAGCTACAACGGTACCTCCGAGCTCCAGCTCGAGCGCATGAGCGTCTACTTCAACG  
AGGCTCCGGCAACAAGTACGTTCTCGTGCCGTCTCGTATCTCGAGCCCGGTACCATGGA  
TGCCGTCCGCGCCGGTCTTTGCGTACGCTCTTCCGCCCTGACAAC-  
TCGTCTTCGGTCA??????????

>E52

????????TTATAGAGTTTTCTAAACTCCCAACCCATGTGAACTTACC-  
ATTGTTGCCTCGGCAGAAGCTGCTCGGT-  
ACACCCTACCTTGAACGGCCTACCCTGTAGCGCCTTACCCTGGAACGGCTTACCCTGTAACGG  
CTGCCGGTGGACTACCAAACCTTTGTTATTTTATTGTAATCTGAGCGTCTTATTTAATAAGTCAA  
AACTTTCAACAACGGATCTCTTGGTTCTGGCATCGATGAAGAACGCAGCGAAATGCGATAAGTA  
ATGTGAATTGCAGAATTCAGTGAATCATCGAATCTTTGAACGCACATTGCGCCCATTAGTATTCT  
AGTGGGCATGCCTGTTGAGCGTCATTTCAACCCTTAAGCCTAGCTTAGTGTGGGAGCCTACT  
G--  
CTTTTACTAGCTGTAGCTCCTGAAATACAACGGCGGATCTGCGATATCCTCTGAGCGTAGTAAAT  
TTTTATCTCGCTTTTACTGGAGTTGCAGCGTCTTAGCCGCTAAATCCCC-AA-  
TTTTTAATGGTTGACCTC????????????????CGCAATCCC-ATCATCC---TCATCATC-----  
ATCATCATCACCACT--CGCAA----CG-TTGCCACACC-GGTGCCGAAAATCTGG-----  
TTTTCGCACCTGCC-CATTTTCCAG--ACACTTACCC-----  
GCCGCACGACCCCGCGGTGCAAACGAAAAAATTCTTA--

TCATAGCCCCACATCACACAAACATTTTGGCAGCCACGCACTTTGCATGACCCACAATGAACAA  
TTGCTGACCCCGCCAAATAGGAAGCCGCCGAGCTCGGAAAGGGTTCCTTCAAGTACGCATGGG  
TTCTTGACAAGCTCAAGGCCGAGCGTGAGCGTGGTATCACCATTGATATCGCTCTCTGGAAGTT  
CGAGACCAACGAGTACAATGTCACCGTCATTGGTTAGTATCCCTGTCCACAACATGTGTCATGT  
CTCCAAACTCAAGACTAACCTTGCAATACAGACGCTCCCGGTCA????????????????TGCTGCCTTC  
TGGTATGTAGCC-CATCTACCTCGACGC-GCCTCAATACGACACCCCGGGCATCACGACAAC-  
-GACATTCTCAAC---

TGCTTGTTTGAACCATAACGAAAGACTTGATACTGACCGGTCTATGATAGGCAAACCATCTCTG  
GCGAGCACGGTCTCGACAGCAATGGAGTGTACGTACCCTTTCTCTGGCTACCCGCGTTCTCGTG  
AACATGTCAGCTAACAGTCG-  
TGCTTGTTTAGCTACAACGGTACCTCCGAGCTCCAGCTCGAGCGCATGAGCGTCTACTTCAACG  
AGGCTTCCGGCAACAAGTACGTTCTCGTGCCGTCTCGTCGATCTCGAGCCCGGTACCATGGA  
TGCCGTCCGCGCCGGTCTTTCCGCCAGCT????????????????????????????????

>E53

AGGGATCATTATAGAGTTTTCTAAACTCCCAACCCATGTGAACTTACC-  
ATTGTTGCCTCGGCAGAAGCTGCTCGGT-  
ACACCCTACCTTGGAACGGCCTACCCTGTAGCGCCTTACCCTGGAACGGCTTACCCTGTAACGG  
CTGCCGGTGGACTACCAAACCTTTGTTATTTTATTGTAATCTGAGCGTCTTATTTAATAAGTCAA  
AACTTTCAACAACGGATCTCTTGGTTCTGGCATCGATGAAGAACGCAGCGAAATGCGATAAGTA  
ATGTGAATTGCAGAATTCAGTGAATCATCGAATCTTTGAACGCACATTGCGCCATTAGTATTCT  
AGTGGGCATGCCTGTTGAGCGTCATTTCAACCCTAAGCCTAGCTTAGTGTGGGAGCCTACT  
G--

CTTTTACTAGCTGTAGCTCCTGAAATACAACGGCGGATCTGCGATATCCTCTGAGCGTAGTAAAT  
TTTTATCTCGCTTTTACTGGAGTTGCAGCGTCTTTAGCCGCTAAATCCCC-AA-  
TTTTAATGGTTGACCTC?????GTCATCCTCGCAATCCC-ATCATCCTCATCATCA-----  
TCATCATCACCACT--CGCAA----CG-TTGCCACACC-GGTGCCGAAAATCTGG-----  
TTTTCGCACCTGCC-CATTTTCCCAG--ACACTTACCC-----  
GCCGCACGACCCCGCGGTGCAAACGAAAAATTTCTTA--

TCATAGCCCCACATCACACAAACATTTTGGCAGCCACGCACTTTGCATGACCCACAATGAACAA  
TTGCTGACCCCGCCAAATAGGAAGCCGCCGAGCTCGGAAAGGGTTCCTTCAAGTACGCATGGG  
TTCTTGACAAGCTCAAGGCCGAGCGTGAGCGTGGTATCACCATTGATATCGCTCTCTGGAAGTT  
CGAGACCAACGAGTACAATGTCACCGTCATTGGTTAGTATCCCTGTCCACAACATGTGTCATGT  
CTCCAAACTCAAGACTAACCT????????????????????????????????????TGCTGCCTTCTGGTATG  
TAGCC-CATCTACCTCGACGC-GCCTCAATACGACACCCCGGGCATCACGACAAC--  
GACATTCTCAAC---

TGCTTGTTTGAACCATAACGAAAGACTTGATACTGACCGGTCTATGATAGGCAAACCATCTCTG  
GCGAGCACGGTCTCGACAGCAATGGAGTGTACGTACCCTTTCTCTGGCTACCCGCGTTCTCGTG  
AACATGTCAGCTAACAGTCG-  
TGCTTGTTTAGCTACAACGGTACCTCCGAGCTCCAGCTCGAGCGCATGAGCGTCTACTTCAACG  
AGGCTTCCGGCAACAAGTACGTTCTCGTGCCGTCTCGTCGATCTCGAGCCCGGTACCATGGA  
TGCCGTCCGCGCCGGTCTTTCCGCCAGCTCTCCGCCCTGACAACTTCGTCTTCGGTCAGTCCG  
?????

>E55

AGGGATCATTATAGAGTTTTCTAAACTCCCAACCCATGTGAACTTACC-

ATTGTTGCCTCGGCAGAAGCTGCTCGGT-  
ACACCCTACCTTGGAACGGCCTACCCTGTAGCGCCTTACCCTGGAACGGCTTACCCTGTAACGG  
CTGCCGGTGGACTACCAAACCTTTGTTATTTTATTGTAATCTGAGCGTCTTATTTAATAAGTCAA  
AACTTTCAACAACGGATCTCTTGGTTCTGGCATCGATGAAGAACGCAGCGAAATGCGATAAGTA  
ATGTGAATTGCAGAATTCAGTGAATCATCGAATCTTTGAACGCACATTGCGCCCATTAGTATTCT  
AGTGGGCATGCCTGTTGAGCGTCATTTCAACCCTTAAGCCTAGCTTAGTGTGGGAGCCTACT  
G--

CTTTTACTAGCTGTAGCTCCTGAAATACAACGGCGGATCTGCGATATCCTCTGAGCGTAGTAAAT  
TTTTATCTCGCTTTTACTGGAGTTGCAGCGTCTTTAGCCGCTAAATCCCC-AA-  
TTTTAATGTTGACCTC????????ATCCTCGCAATCCC-ATCATCCTCATCATCA-----  
TCATCATCACCACT--CGCAA----CG-TTGCCACACC-GGTGCCGAAAATCTGG-----  
TTTTCGCACCTGCC-CATTTTCCCAG--ACACTTACCCC-----  
GCCGCACGACCCCGCGGTGCAAACGAAAAATTTCTTA--  
TCATAGCCCCACATCACACAAACATTTTGGCAGCCACGCACTTTGCATGACCCACAATGAACAA  
TTGCTGACCCCGCCAAATAGGAAGCCGCCGAGCTCGGAAAGGGTTCCTTCAAGTACGCATGGG  
TTCTTGACAAGCTCAAGGCCGAGCGTGAGCGTGGTATCACCATTGATATCGCTCTCTGGAAGTT  
CGAGACCAACGAGTACAATGTCACCGTCATTGGTTAGTATCCCTGTCCACAACATGTGTCATGT  
CTCCAAACTCAAGACTAACCTTGCAATACAGACGCTCCCGGTACCGTGATTTTCATCAATGCTG  
CCTTCTGGTATGTAGCC-CATCTACCTCGACGC-  
GCCTCAATACGACACCCCGGGCATCACGACAAC--GACATTCTCAAC---  
TGCTTGTGGTGGAAACCATAACGAAAGACTTGATACTGACCGGTCTATGATAGGCAAACCATCTCTG  
GCGAGCACGGTCTCGACAGCAATGGAGGTACGTACCCTTTCTCTGGCTACCCGCGTTCTCGTG  
AACATGTCAGCTAACAGTCG-  
TGCTTGTAGCTACAACGGTACCTCCGAGCTCCAGCTCGAGCGCATGAGCGTCTACTTCAACG  
AGGCTTCCGGCAACAAGTACGTTCTCGTGCCGTCTCGTCGATCTCGAGCCCGGTACCATGGA  
TGCCGTCCGCGCCGGTCTTTCCGGCCAGCTCTCCGCCCTGACAACCT????????????????

>JY1

AGGGATCATTATAGAGTTTTCTAAACTCCCAACCCATGTGAACTTACC-  
ATTGTTGCCTCGGCAGAAGCTGCTCGGT-  
GCACCTACCTTGGAACGGCCTACCCTGTAGCGCCTTACCCTGGAACGGCTTACCCTGTAGCGG  
CTGCCGGCGGACTACCAAACCTTTGTTATTTTATTGTAATCTGAGCGTCTTATTTAATAAGTCAA  
AACTTTCAACAACGGATCTCTTGGTTCTGGCATCGATGAAGAACGCAGCGAAATGCGATAAGTA  
ATGTGAATTGCAGAATTCAGTGAATCATCGAATCTTTGAACGCACATTGCGCCCATTAGTATTCT  
AGTGGGCATGCCTGTTGAGCGTCATTTCAACCCTTAAGCCTAGCTTAGTGTGGGAGCCTACT  
G--

CTTTTACTAGCTGTAGCTCCTGAAATACAACGGCGGATCTGCGATATCCTCTGAGCGTAGTAA-  
TTTTATCTCGCTTTTACTGGAGTTGCAGCGTCTTTAGCCGCTAAACCCCC-AA-  
TTTTAATGTTGACCTCAGGTTAGTCATCCTCGCAATCCC-ATCATCC-----TCATC-----  
TTCATCACCATCACCT--CGCAA----CA-TTCCACACC-GGTGCCGAAAATCT-G-----  
TTTTCGCACCTGCC-CATTTTCCCAG--ACACTTACCCC-----  
GCCGCACGACCCCGCGGTGCAAACGAAAAATTTCTTA--TCATAGCCCCACATCAC--  
AAACATTTTGGCAGCCACGCACTCTGCATGACCCACAATGAACAATTGCTGACCCCGCCAAATA  
GGAAGCCGCCGAGCTCGGAAAGGGTTCCTTCAAGTACGCATGGGTTCTTGACAAGCTCAAGGC  
CGAGCGTGAGCGTGGTATCACCATTGATATCGCTCTCTGGAAGTTCGAGACCAACGAGTACAAT

GTCACCGTCATTGGTTAGTATCCCTGCCCAACATGTGTCATGTCTCCGAACTCGAGACTAACC  
TTACAATACAGACGCTCCCGGTACCGTGATTCATCAATGCTGCCTTCTGGTATGTAGCC-  
CATCTACCCCGACGC-GTCTCAATACGACA-CCCCGGCAACTCGACAAC--GACGTTCTCAAC-  
--

TGCTTGGTTGAAACCAAATGAAAGACTTGATACTGATCGGTCTCTGATAGGCAAACCATCTCTG  
GCGAGCACGGTCTCGACAGCAATGGAGTGACGTACCCTTTCCCTGGCTACTCGCTTTCTCGT  
AACATGTCAGCTAACACTCG-

TGCTTGTTCAGCTACAACGGTACCTCCGAGCTCCAGCTCGAGCGCATGAGCGTCTACTTCAACG  
AGGCTCCGGCAACAAGTACGTTCTCGTGCCGTCTCGTCGATCTCGAGCCCGGTACCATGGA  
TGCCGTCCGCGCCGGTCTTTCCGGTCAGCTCTTCCGCC????????????????????????

>L19\_1

????????????????????????CTCCCAACCCATGTGAACTTACC-  
ATTGTTGCCTCGGCAGAAGCTGCTCGGT-  
GCACCCTACCTTGAACGGCCTACCCTGTAGCGCCTTACCCTGGAACGGCTTACCCTGTAACGG  
CTGCCGGTGGACTACCAAACCTTTGTTATTTTATTGTAATCTGAGCGTCTTATTTAATAAGTCAA  
AACTTTCAACAACGGATCTTTGGTTCTGGCATCGATGAAGAACGCAGCGAAATGCGATAAGTA  
ATGTGAATTGCAGAATTCAGTGAATCATCGAATCTTTGAACGCACATTGCGCCATTAGTATTCT  
AGTGGGCATGCCTGTTGAGCGTCATTTCAACCCTTAAGCCTAGCTTAGTGTGGGAGCCTACT  
G--

CTTTTGCTAGCTGTAGCTCCTGAAATACAACGGCGGATCTGCGATATCCTCTGAGCGTAGTAAAT  
TTTTATCTCGCTTTTACTGGAGTTGCAGCGTCTTTGGCCGCTAAATCCCC-AA-  
TTTTAATGGT????????????????TCCTCGCAATCCC-ATCATCC-----TCATC-----  
CTCATCATCACTT--CGCAA----CATTTCCACACC--GGTGTGAAAATCTGG-----  
TTTTCGCACCTGCC-CATTTTCTCAG--ACACTTACCC-----

GCCGCACGACCCCGCGGTGCAAACGAAAAATTTCTTA--  
TCACAGCCCCACATCACACAAACATTTTGGCAGCCACGCACCTTGCATGACCCACAATGAACAA  
TTGCTGACCCCGCAAATAGGAAGCCGCGAGCTCGGAAAGGGTTCCTTCAAGTACGCATGGG  
TTCTTGACAAGCTCAAGGCCGAGCGTGAGCGTGGTATCACCATTGATATCGCTCTCTGGAAGTT  
CGAGACCAACGAGTACAATGTCACCGTCATTGGTTAGTATCCCTGCCACAATATGTGTCATGT  
CTCTGAACTCAAGACTAACCTTGCAATACAGACGCTCCCGGTACCGTGATTCATCAA???????  
?????????????C-CATCTACCTCGACGC-GCCTCAATACGACA-CCCCGGCAACTCGACAAC--  
GACATTCTCAAC---

TGCTTGTGGTGAACCATACGAAAGACTTCATACTGACCGGTCTATGATAGGCAAACCATCTCTGG  
CGAGCACGGTCTCGACAGCAATGGAGTGACGTACCCTTGATCTCGCTACTCGCTTTCTCGTGA  
ACATGTCAGCTAACAGTCG-

TGCTTGTTCAGCTACAACGGTACCTCCGAGCTCCAGCTCGAGCGCATGAGCGTCTACTTCAACG  
AGGCTCCGGCAACAAGTACGTTCTCGTGCCGTCTCGTCGATCTCGAGCCCGGTACCATGGA  
TGCCGTCCGCGCCGGTCTTTCCGGTCAGCTCTTCCGCCCTGACAACTTCGTCTTCGGTCAGTCCG  
GTGCC

>M13

AGGGATCATTATAGAGTTTTCTAAACTCCCAACCCATGTGAACTTACC-  
ATTGTTGCCTCGGCAGAAGCTGCTCGGT-  
GCACCTTACCTTGAACGGCCTACCCTGTAGCGCCTTACCCTGGAACGGCTTACCCTGTAGCGG  
CTGCCGGTGGACTACCAAACCTTTGTTATTTTATTGTGATCTGAGCGTCTTATTTAATAAGTCAA



AACTTTCAACAACGGATCTCTTGGTTCTGGCATCGATGAAGAACGCAGCGAAATGCGATAAGTA  
ATGTGAATTGCAGAATTCAGTGAATCATCGAATCTTTGAACGCACATTGCGCCCATTAGTATTCT  
AGTGGGCATGCCTGTTTCGAGCGTCATTTCAACCCTTAAGCCTAGCTTAGTGTGGGAGCCTACT  
G--

CTTTTGCTAGCTGTAGCTCCTGAAATACAACGGCGGATCTGCGATATCCTCTGAGCGTAGTAA-  
TTTTATCTCGCTTTTACTGGAGTTGCAGCGTCTTAGCCGCTAAACCCCC-AA-  
TTTTAATGGTTGACCTCAGGTTAGTCATCCTCGCAATCCC-ATCAT-----  
---CATCATCACCT--CGCAA----CA-TTCCACGCC-GGTGCCGAAAATCTGG-----

TTTTCGCACCTGCC-CATTTTCCCG--ACACTTACCC-----  
GCCGCACGACCCCGCGGTGCAAACGAAAAATTTCTTA--  
TCATGGCCCCACATCACACAAACATTTTGGCAGCCACGCACTTTGCAAGACCCACAACGAACAA  
TTGCTGACCCCGCCAAATAGGAAGCCGCCGAGCTCGGAAAGGGTTCCTTCAAGTACGCATGGG

TTCTTGACAAGCTCAAGGCCGAGCGTGAGCGTGGTATCACCATTGATATCGCTCTCTGGAAGTT  
CGAGACCAACGAGTACAATGTCACCGTCATTGGTTAGTATCCCTGTCCACAACATGCATCATGT  
CTCCGAACTCAAGACTAACCTTGAATACAGATGCTCCCGGTCACCGTGATTTTCATCAATGCTG  
CCTTCTGGTATGTAGCC-CATCTACCCCGACGC-GTCTCAATACGAAA-

CCCCCGCAACTCGACAAC--GACGTTCTCAAC---  
TGCTTGGTTGAAACCAATGAAAGACTTGATACTGATCGGTCTCTGATAGGCAAACCATCTCTG  
GCGAGCACGGTCTCGACAGCAATGGAGGTACGTACCCTTCCCTGGCTACTCGCTTCTCGTG  
AACATGTCAGCTAACACTCG-

TGCTTGTTCAGCTACAACGGTACCTCCGAGCTCCAGCTCGAGCGCATGAGCGTCTACTTCAACG  
AGGCTTCCGGCAACAAGTACGTTCTCGTGCCGTCTCGTCGATCTCGAGCCCGGTACCATGGA  
TGCCGTCCGCGCCGGTCTTTCGGTCAGCT????????????????????????????????????  
>M18

????????TTATAGAGTTTCTAAACTCCCAACCCATGTGAACTTACC-  
ATTGTTGCCTCGGCAGAAGCTGCTCGGT-  
GCACCTACCTTGAACGGCCTACCCTGTAGCGCCTTACCCTGGAACGGCTTACCCTGTAGCGG  
CTGCCGGTGGACTACCAAACCTTTGTTATTTTATTGTAATCTGAGCGTCTATTTAATAAGTCAA

AACTTTCAACAACGGATCTCTTGGTTCTGGCATCGATGAAGAACGCAGCGAAATGCGATAAGTA  
ATGTGAATTGCAGAATTCAGTGAATCATCGAATCTTTGAACGCACATTGCGCCCATTAGTATTCT  
AGTGGGCATGCCTGTTTCGAGCGTCATTTCAACCCTTAAGCCTAGCTTAGTGTGGGAGCCTACT  
G--

CTTTTACTAGCTGTATCTCCTGAAATACAACGGCGGATCTGCGATATCCTCTGAGCGTAGTAA-  
TTTTATCTCGCTTTTACTGGAGTTGCAGCGTCTTAGCCGCTAAATCCCC-  
AATTTTTAATGGTTGACCTCAGGTTAGTCATCCTCACAATCCC-ATCATC-----  
---TCATCATCATCACCT--CGCAA----CA-TTCCACACC-GGTGCCAAAAATCTGG-----

TTTTCGCACCTGCC-CATTTTCCAG--ACACTTACCC-----  
GCCGCACGACCCCGCGGTGCAAACGAAAAATTTCTTA--  
TCATAGCCCCACATCACACAAACATTTTCGACAGCCGCGCACTTTGCAAGACCCACAATGAACAA  
TTGCTGACCCCGCCAAATAGGAAGCCGCCGAGCTCGGAAAGGGTTCCTTCAAGTACGCATGGG

TTCTTGACAAGCTCAAGGCCGAGCGTGAGCGTGGTATCACCATTGATATCGCTCTCTGGAAGTT  
CGAGACCAACGAGTACAATGTCACCGTCATTGGTTAGTATCCCTGTCCACAACATGTGTCATGT  
CTCCGAACTCAAGACTAACCTTACAACACAGACGCTCCCGGTCACCGTGATTTTCATCAATGCTG  
CCTTCTGGTATGTAGCC-CATCTACCCCGACGC-GTCTCAATACGACA-

CCCCGGCAACTCGACAAC--GACGTTCTCAAC---  
TGCTTGGTTGAAACCAATGAAAGACTTGATACTGACCGGTCTCTGATAGGCAAACCATCTCTG  
GCGAGCACGGTCTCGACAGCAATGGAGTGTACGTACCCTTTCCCTGGCTACTCGCTTTCTCGT  
AACATGTCAGCTAACACTCG-  
TGCTTGTTCAGCTACAACGGTACCTCCGAGCTCCAGCTCGAGCGCATGAGCGTCTACTTCAACG  
AGGCTCCGGCAACAAGTACGTTCCCTCGTGCCGTCTCGTCGATCTCGAGCCCGGTACCATGGA  
TGCCGTCCGCGCCGGTCTTTCCGTCAGCTC????????????????????????????????

>M26

AGGGATCATTATAGAGTTTTCTAAACTCCCAACCCATGTGAACTTACC-  
ATTGTTGCCCTCGGCAGAAGCTGCTCGGT-  
GCACCTACCTTGGAACGGCCTACCCTGTAGCGCCTTACCCTGGAACGGCTTACCCTGTAGCGG  
CTGCCGGCGGACTACCAAACCTTTGTTATTTTATTGTAATCTGAGCGTCTTATTTAATAAGTCAA  
AACTTTCAACAACGGATCTCTTGTTCTGGCATCGATGAAGAACGCAGCGAAATGCGATAAGTA  
ATGTGAATTGCAGAATTCAGTGAATCATCGAATCTTTGAACGCACATTGCGCCATTAGTATTCT  
AGTGGGCATGCCTGTTGAGCGTCATTTCAACCCTAAGCCTAGCTTAGTGTGGGAGCCTACT  
G--  
CTTTTACTAGCTGTAGCTCCTGAAATACAACGGCGGATCTGCGATATCCTCTGAGCGTAGTAA-  
TTTTTATCTCGTTTTGACTGGAGTTGCAGCGTCTTAGCCGCTAAACCCCC-AA-  
TTTTAATGGTTGACCTCAGGTTAGTCATCCTCGCAATCCC-ATCAT-----  
---CATCATCACCT--CGCAA-----CA-TTCCACGCC-GGTGCCGAAAATCTGG-----  
TTTTCGCACCTGCC-CATTTCCCGG--ACACTTACCC-----  
GCCGCACGACCCCGCGGTGCAAACGAAAAATTTCTTA--  
TCATGGCCCCACATCACACAAACATTTTGGCAGCCACGCACTTTGCAAGACCCACAACGAACAA  
TTGCTGACCCCGCCAAATAGGAAGCCGCCGAGCTCGGAAAGGGTTCCTTCAAGTACGCATGGG  
TTCTTGACAAGCTCAAGGCCGAGCGTGAGCGTGGTATCACCATTGATATCGCTCTCTGGAAGTT  
CGAGACCAACGAGTACAATGTCACCGTCATTGGTTAGTATCCCTGTCCACAACATGCATCATGT  
CTCCGAACTCAAGACTAACCTTGCAATACAGATGCTCCCGGTACCGTGATTTTCAATGCTG  
CCTTCTGGTATGTAGCC-CATCTACCCGACGC-GTCTCAATACGACA-  
CCCCGGCAACTCGACAAC--GACGTTCTCAAC---  
TGCTTGGTTGAAACCAATGAAAGACTTGATACTGATCGGTCTCTGATAGGCAAACCATCTCTG  
GCGAGCACGGTCTCGACAGCAATGGAGTGTACGTACCCTTTCCCTGGCTACTCGCTTTCTCGT  
AACATGTCAGCTAACACTCG-  
TGCTTGTTCAGCTACAACGGTACCTCCGAGCTCCAGCTCGAGCGCATGAGCGTCTACTTCAACG  
AGGCTCCGGCAACAAGTACGTTCCCTCGTGCCGTCTCGTCGATCTCGAGCCCGGTACCATGGA  
TGCCGTCCGCGCCGGTCTTTCCGTCAGCTC????????????????????????????????

>N\_cubana\_CBS\_600\_96

AGGGATCATTATAGAGTTTTCTAAACTCCCAACCCATGTGAACTTACCTTTTGTGCTCGGCAG  
AAGTT-----  
ATAGGTCTTCTTATAGCTGCTGCCGGTGGACCATTAAACTCTTGTATTTTAT-  
GTAATCTGAGCGTCTTATTTAATAAGTCAAACTTTCAACAACGGATCTCTTGTTCTGGCATCG  
ATGAAGAACGCAGCGAAATGCGATAAGTAATGTGAATTGCAGAATTCAGTGAATCATCGAATCT  
TTGAACGCACATTGCGCCATTAGTATTCTAGTGGGCATGCCTGTTGAGCGTCATTTCAACCCT  
TAAGCCTAGCTTAGTGTGGGAATCTACTT--  
CTCTTAGGAGTTGTAGTTCCTGAAATACAACGGCGGATTTGTAGTATCCTCTGAGCGTAGTAA-

TTTTTTTCTCGCTTTTGTAGGTGCTATAACTCCC--AGCCGCTAAACCCCC--AA-  
TTTTTTGTGGTTGACCTCAGGTTAGTCATCTATTGATTCCC-ATCATCA-----  
-TTCCCTTCACTC----CAGCGTCATGATTTTCAACCTACGCGTTGAAAATTA-----  
TTTTCGCTCCTTCCACACTTTTTTTCG--  
CTGGTTACCCCGCCGCGAGGCCGACGACCCCGCGGTGCAAACGAAAAATTTCTTA--  
TCACAGCCCCACCTTTCACAAGCA-----  
ACCATGCATTGCTCATGACCCACTTTGAACAATTGCTAATGCCTTCATACAGGAAGCCGCCGAG  
CTCGGTAAGGGTTCCTTCAAGTACGCCTGGGTTCTTGACAAGCTCAAGGCCGAGCGTGAGCGTG  
GTATCACCATCGATATCGCTCTCTGGAAGTTCGAGACCAACGAGTACAATGTCACCGTCATTGG  
TTAGTACCCCTCCACCTACCATGTGCTGCTCCATAAGACACTTGACTAACCTTGCTTCATAGACG  
CTCCCGGTCACCGTGATTTTCATCAATGCTGCCTTCTGGTATGTAACC-  
TGTCTGTCTCGACACGGCCTCAATACGACG-TTTTTCGTGCCTGCA-----  
CGACAGCCCCGAACAGTATTAGGTCAAGATAGAGGGA---  
ACATGATGCTAATAGGTCATTGATAGGCAAACCATCTCTGGCGAGCACGGTCTCGACAGCAATG  
GAGTGTATGTAATAATTTCAATTCCTCTGCTTCTGTTGAGCTTGTAGGCTGAC--  
TCGATGGCCATTTAGCTACAACGGTACCTCCGAGCTCCAGCTCGAGCGTATGAGCGTCTACTTC  
AACGAGGCTTCCGGAACAAGTACGTTTCTCGTGCCGTCCTCGTGCATCTCGAGCCCGGTACCA  
TGGATGCCGTCGCGCCGGTCCCTTCGGCCAGCTCTCCGCCCTGACAACCTTCGTCTTCGGTCA  
GT???????

>N\_protearum\_CBS\_114178

AGGGATCATTATAGAGTTTTCTAAACTCCCAACCCATGTGAACCTTACCTTTTGTTCGCTCGGCAG  
AAGTT-----  
ATAGGTCTTCTTATAGCTGCTGCCGGTGGACCATTAAACTCTTGTTATTTTAT-  
GTAATCTGAGCGTCTTATTTTAATAAGTCAAACTTTCAACAACGGATCTCTTGTTCTGGCATCG  
ATGAAGAACGCAGCGAAATGCGATAAGTAATGTGAATTGCAGAATTCAGTGAATCATCGAATCT  
TTGAACGCACATTGCGCCATTAGTATTCTAGTGGGCATGCCTGTTTCGAGCGTCATTTCAACCCT  
TAAGCCTAGCTTAGTGTTGGGAATCTACTT--  
CTCTTAGGAGTTGTAGTTCCTGAAATACAACGGCGGATTTGTAGTATCCTCTGAGCGTAGTAA-  
TTTTTTTCTCGCTTTTGTAGGTGCTATAACTCCC--AGCCGCTAAACCCCC--AA-  
TTTTCTGTGGTTGACCTC????AGTCATTTATTGATTCCC-ATCATCC-----  
--CCCTTCACTT----CAGCATCATAATTTTCAACCTACGTGTTGAAAATTA-----  
TTTTCGCTCCTTCCACACTTTTTTTCG-  
CTGGTTACCCCGCCGCGAGGCCGACGACCCCGCGGTGCAAACGAAAAATTTCTTA--  
TCACAGCCCCACCTTGCACAAGCA-----  
ACCATGCATTGCTCATGACCCACTTTGAACAATTGCTAATGCCTTCATACAGGAAGCCGCCGAG  
CTCGGTAAGGGTTCCTTCAAGTACGCCTGGGTTCTTGACAAGCTCAAGGCCGAGCGTGAGCGTG  
GTATCACCATCGATATCGCTCTCTGGAAGTTCGAGACCAACGAGTACAATGTCACCGTCATTGG  
TTAGTACCCCTCCACCTACCATGTGCTGCTCCATAAGACACTTGACTAACCTTGCTTCATAGACG  
CTCCCGGTCACCGTGATTTTCATCAATGCTGCCTTCTGGTATGTTACC-  
TGTCTGCCTCGACACGGCCTTACTACGACG-TTTTTCGTGCCTGCA-----  
CGACGGCCCCGAAAAGTAATAGGTCAAGATAGAGGGA---  
ACATGATACTAATAGGTCATTTATAGGCAAACCATCTCTGGCGAGCACGGTCTCGACAGCAATG  
GAGTGTATGTAATAACTTCAATTCCTCTGCTTCTGTTGAGTTTGTAGGCTGAC--  
TCGATGGCCATTTAGCTACAACGGTACCTCCGAGCTCCAGCTCGAGCGTATGAGCGTCTACTTC

AACGAGGCTTCCGGCAACAAGTACGTTCCCTCGTGCCGTCCTCGTCGATCTCGAGCCCGGTACCA  
TGGATGCCGTCCGCGCCGGTCCCTTCGGCCAGCTCTTCCGCCCTGACAACCTTCGTCTTCGGTCA  
GTCCGGTGCT

>P\_adusta\_ICMP\_6088

?????CATTATAGAGTTTTCTAAACTCCCAACCCATGTGAACTTACC-  
ATTGTTGCCTCGGCAGAAGCTGCTCGGT-  
GCACCTACCTTGGAACGGCCTACCCTGTAGCGCCTTACCCTGGAACGGCTTACCCTGCAACGG  
CTGCCGGTGGACTACCAAACCTTTGTTATTTTATGGTTATCTGAGCGTCTTATTTAATAAGTCAA  
AACTTTCAACAACGGATCTCTTGGTTCTGGCATCGATGAAGAACGCAGCGAAATGCGATAAGTA  
ATGTGAATTGCAGAATTCAGTGAATCATCGAATCTTTGAACGCACATTGCGCCATTAGTATTCT  
AGTGGGCATGCCTGTTGAGCGTCATTTCAACCCTTAAGCCTAGCTTAGTGTGGGAGCCTACT  
G--  
CTTTTGCTAGCTGTAGCTCCTGAAATACAACGGCGGATCTGCGATATCCTCTGAGCGTAGTAA-  
TTTTTATCTCGTTTTGACTGGAGTTGCAGCGTCTTAGCCGCTAAACCCCC-AA-  
TTTTAATGGTTGACCTCAGGTTAGTCATGCTCACA-TCCC-ATCATCC-----TCATC-----  
--ATCATCATCGCCT--CGCAA----CA-TTTCCAACC-GGTGCCGAAATTCT-G-----  
TTTTCGCACCTGCC-CATTTTCCAG--ACACTTATCCC-----  
GCCGCACGACCCCGCGGTGCAAACGAAAAATTTCTTATCTCACAGCCCCACTTCACAC-  
AACATTTTGGCAGCCACGCACTTTGCATGACCCACAATGAACAATTGCTGACCCCGCCAAATAG  
GAAGCCGCGAGCTCGGAAAGGGTTCCTTCAAGTACGCATGGGTTCTTGACAAGCTCAAGGCC  
GAGCGTGAGCGTGGTATCACCATTGATATCGCTCTCTGGAAGTCGAGACCAACGAGTACAATG  
TCACCGTCATTGGTTAGTATCCCTGTCCATAGAAAGTATCATGTGTCCGAACTC-  
AGACTAACATCGCAATACAGACGCTCCCGGTCACCGTGATTCATCAATGCTGCTTTCTGGTATG  
TAGCC-CAACTACCTCGACAC-GCCTCAATACGACA-CCCTCCACAACCTCGACGAC--  
GGCATTCTCGGC---

>P\_adusta\_MFLUCC\_10\_0146

?????CATTATAGAGTTTTCTAAACTCCCAACCCATGTGAACTTACC-  
ATTGTTGCCTCGGCAGAAGCTGCTCGGT-  
GCACCCTACCTTGGAACGGCCTACCCTGTAGCGCCTTACCCTGGAACGGCTTACCCTGCAACGG  
CTGCCGGTGGACTACCAAACCTTTGTTATTTTATGGTTATCTGAGCGTCTTATTTAATAAGTCAA  
AACTTTCAACAACGGATCTCTTGGTTCTGGCATCGATGAAGAACGCAGCGAAATGCGATAAGTA  
ATGTGAATTGCAGAATTCAGTGAATCATCGAATCTTTGAACGCACATTGCGCCATTAGTATTCT  
AGTGGGCATGCCTGTTGAGCGTCATTTCAACCCTTAAGCCTAGCTTAGTGTGGGAGCCTACT  
G--  
CTTTTGCTAGCTGTAGCTCCTGAAATACAACGGCGGATCTGCGATATCCTCTGAGCGTAGTAA-  
TTTTTATCTCGTTTTGACTGGAGTTGCAGCGTCTTAGCCGCTAAACCCCC-AA-  
TTTTAATGGTTGACCTCAGGTTAGTCATGCTCACA-TCCC-ATCATCC-----TCATC-----

--ATCATCATCGCCT--CGCAA----CA-TTTTCCAACC-GGTGCCGAAATTCT-G-----  
TTTTCGCACCTGCC-CATTTTTCCAG--ACACTTACCCC-----  
GCCGCACGACCCCGCGGTGCAAACGAAAAATTTCTTATCTCACAGCCCCACTTCACAC-  
AACATTTTGGCAGCCACGCACTTTGCATGACCCACAATGAACAATTGCTGACCCCGCCAAATAG  
GAAGCCGCCGAGCTCGGAAAGGGTTCCTTCAAGTACGCATGGGTTCTTGACAAGCTCAAGGCC  
GAGCGTGAGCGTGGTATCACCATTGATATCGCTCTCTGGAAGTTCGAGACCAACGAGTACAATG  
TCACCGTCATTGGTTAGTATCCCTGTCCATAGAAAGTATCATGTGTCCGAACTC-  
AGACTAACATCGCAATACAGACGCTCCCGGTACCGTGATTTTCATCAATGCTGCTTTCTGGTATG  
TAGCC-CAACTACCTCGACAC-GCCTCAATACGACA-CCCTCCACAACCTCGACGAC--  
GGCATTCTCGGC---  
TACTTGGTTGGAACCAAACGAAAGACTTGATACTGACCGGTCTCTGATAGGCAAACCATCTCTG  
GCGAGCACGGTCTCGACAGCAATGGAGGTACGTACCGCTTCTTGGCTACTTGCTTTCCACG  
GACTTGTAGCTAACACTCG-  
TGCTTGCTCAGCTACAACGGCACCTCCGAGCTCCAGCTCGAGCGCATGAGCGTCTACTTCAACG  
AGGCTTCCGGCAACAAGTACGTTCTCGTGCTGTCTCGTATCTCGAGCCCGGTACCATGGA  
CGCCGTCCGCGCGGTCTTTTCGGCCAGCTCTTCCGCCCTGACAACCTCGTCTTCGGTCAGTCC  
GGTGCC  
>P\_aggestorum\_LC6301  
????????????????????????????????????ACCCATGTGAACTTACC-  
ATTGTTGCCTCGGCAGAAGCTGCTCGGT-  
ATACCCTACCTTGAACGGCCTACCCTGTAGCGCCTTACCCTGGAACGGCTTACCCTGCAACGG  
CTGCCGGTGGACTACTAACTCTTGTATTTTATTGTAATCTGAGCGTCTATTTAATAAGTCAA  
AACTTTCAACAACGGATCTCTTGGTTCTGGCATCGATGAAGAACGCAGCGAAATGCGATAAGTA  
ATGTGAATTGCAGAATTCAGTGAATCATCGAATCTTTGAACGCACATTGCGCCATTAGTATTCT  
AGTGGGCATGCCTGTTGAGCGTCATTTCAACCCTAAGCCTAGCTTAGTGTGGGAGCCTACT  
G--  
CTTTTGCTAGCTGTAGCTCCTGAAATACAACGGCGGATCTGCGATATCCTCTGAGCGTAGTAA-  
TTTTATCTCGCTTTGACTGGAGTTCAGCGTCTTTAGCCGCTAAACCCCC-AA-  
TTTTAATGGTTGACCTCAGGTTAGTCATGCTCACAGTCCC-ATCATCC-----TCATC-----  
--ATAATCATCGACT--CGCAA----CA-TTTTCCAACC-GGTGCCGAAATTCT-G-----  
TTTTCGCACCTGCC-CATTTTCCTAG--ACACTTACCCC-----  
GCCGCACGACCCCGCGGTGCAAACGAAAAATTTCTTA--TCACAGCCCCACTTCACAC-  
AACATTTTGGCAGCCACGCACTTTGCATGACCCACAATGAACAATTGCTGACCCCGCCAAATAG  
GAAGCCGCCGAGCTCGGAAAGGGTTCCTTCAAGTACGCATGGGTTCTTGACAAGCTCAAGGCC  
GAGCGTGAGCGTGGTATCACCATTGATATCGCTCTCTGGAAGTTCGAGACCAACGAGTACAATG  
TCACCGTCATTGGTTAGTATCCCTGTCCACAGAAAGTATCATGTGTCCGAACTC-  
AGACTAACATCGCAATACAGACGCTCCCGGTACCGTGATTTTCATCAATGCTGCCTTCTGGTAT  
GTAGCC-CATCTACCTCGGCAC-GCCTCAATACGACA-CCCTCCGCAACTCGACGAC--  
GACATTCTCGGC---  
TACTTGGTTGGAACCGAACGAAAGACTTGATACTGACCGGTCTCTGATAGGCAAACCATCTCTG  
GCGAGCACGGTCTCGACAGCAATGGAGGTACGTACCATTTCTTGCCTACTTGCTTTCCACG  
AACATGTTAGCTAACACTCG-  
TGCTTGCTCAGCTACAACGGCACCTCCGAGCTCCAGCTCGAGCGCATGAGCGTCTACTTCAACG  
AGGCGTCCGGCAACAAGTACGTTCTCGTGCCGTCTCGTATCTCGAGCCCGGTACCATGGA

CGCCGTCCGCGCCGGTCCTTTTCGGCCAGCTCTTCCGCCCTGACAACTTCGTCTTCGGTCAGTCC  
GGTGCC

>P\_anacardiacearum\_IFRDCC\_2397

?????CATTATAGAGTTTTCTAAACTCCCAACCCATGTGAACTTACCAATTGTTGCCTCGGCAGAG  
GCTACCCGGT---

ACCTTACCTTGGTGCGGCCTACCCTGTAGCGCCTTACCCTGGAACGGGCTACCCTGTAGCGGCT  
GCCGGTGGACTACCAAACCTTTGTTATTTTATGGTTATCTGAGCGTCTTATTTTAATAAGTCAAAA  
CTTTCAACAACGGATCTCTTGGTTCTGGCATCGATGAAGAACGCAGCGAAATGCGATAAGTAAT  
GTGAATTGCAGAATTCAGTGAATCATCGAATCTTTGAACGCACATTGCGCCCATTAGTATTCTAG  
TGGGCATGCCTGTTTCGAGCGTCATTTCAACCCTTAAGCCTAGCTTAGTGTGGGAGCCTACTG--  
CTTTTACTAGCTGTAGCTCCTGAAATACAACGGCGGATCTGCGATATCCTCTGAGCGTAGTAATT  
TTTTTTCTCGCTTTTACTGGAGTTGCAGCGTCCTTAGCCGCTAAACCCCC-AA-

TTTTAATGG-TGACCTCAGGTTAGTCATCCTCACAAATCCC-ATCAGCA-----CATT-----

----CATGGCCTCCC--ATCGAA----GA-TCTCCGACCC-GATGTCGAAAATAT----

TTTCGTTTTTCGCACCTTCC-CACATTTTC----

CCACTTACCCCGCCGCATGGCCGCACGACCCCGCGGTGCAAACGAAAAAATTCTTA--T--

CAGCCCCACCTCGCACAAACATTTTGGCAGCCACGCACTTT-

CATGACCCATGATGAGCCATTGCTGACCCCGCCAAACAGGAAGCCGCCGAGCTCGGAAAGGGT  
TCCTTCAAGTACGCCTGGGTTCTTGACAAGCTCAAGGCCGAGCGTGAGCGTGGTATCACCATCG  
ATATCGCTCTCTGGAAGTTCGAGACCAACGAGTACAATGTCACCGTCATTGGTTAGTATCCCTGT  
CCACAACAACCTCATGCATCCGAACTC-

AGACTAACATGACAATACAGACGCTCCCGGTCACCGTGACTTCATCAATGCTGCTTTCTGGTAT  
GTACCCCATCGACCTCGACAC-GCCCCGACACGACG-

CCTCCCGCAACTCGACAACGCGGCGTTCTCAAC---

TACTTGGTTGGAACCAAACGAAAGACTTGATACTGACCAGTCTTTGATAGGCCAAACCATTCTG  
GCGAGCACGGTCTCGACAGCAATGGAGTGTACGTACCCTTTCCTTGGCTCCTTGCTTTCCCATGA  
GCATGTTGACTAACACTCG-

TGGTTGTTTCAGCTACAACGGTACCTCTGAGCTCCAGCTCGAGCGCATGAGCGTCTACTTCAACG  
AGGCTTCCGGCAACAAGTACGTTCCCCGTGCTGTCTCGTCGATCTCGAGCCCGGTACCATGGA  
TGCCGTCCGCGCCGGTCTTTTCGGCCAGCTCTTCCGCCCTGACAACTTCGTCTTCGGTCAGTCCG  
GTGCT

>P\_arceuthobii\_CBS\_434\_65

AGGGATCATTATAGAGTTTTCTAAACTCCCAACCCATGTGAACTTACT-

ATTGTTGCCTCGGCAGAGGCTACCCGGT----

ACCTACCTTGGAACGGCCTACCCTGTAGCGCCTTACCCGGGAACGGATTACCCTGTAGCGGCTG  
CCGGTGGACCACTAAACTCTTGTATTTTATTGTAATCTGAGCGTCTTATTTTAATAAGTCAAAAC  
TTTCAACAACGGATCTCTTGGTTCTGGCATCGATGAAGAACGCAGCGAAATGCGATAAGTAATG  
TGAATTGCAGAATTCAGTGAATCATCGAATCTTTGAACGCACATTGCGCCCATTAGTATTCTAGT  
GGGCATGCCTGTTTCGAGCGTCATTTCAACCCTTAAGCCTAGCTTAGTGTGGGAGCCTACTG--  
CTTTTACTAGCTGTAGCTCCTGAAATACAACGGCGGATCTGCGATATCCTCTGAGCGTAGTAA-

TTTTTTCTCGCTTTTACTGGAGTTGCAGCGTCCTTTGCCGCTAAACCCCCA-AA-

TTTTAATGGTTGACCTCAGGTTAGTCATCCTCCTGATCCC-CTCATCA-----

TCGTATCACCCTTTCCCTCC----AACATCTTCAACC--GGGTCGAAAATCT--

ATTTTTTCTATCCGCACCTGGG-CATATTCTG----

GCACTTACCCCGCCGCGTGGCCGCACGACCCCGCGGTGCCAACGAAAAATTTCTTA--  
TCACAGCCCCACCTCGCACAAACATTTTGGCCGCTATGC-  
CTTTTCAATACCCACTTTGAGCACTTGCTGACACCGCCAAACAGGAAGCCGCGGAGCTCGGTAA  
GGGTTCTTCAAGTACGCCTGGGTTCTTGACAAGCTCAAGGCCGAGCGTGAGCGTGGTATCACC  
ATCGATATCGCTCTCTGGAAGTTCGAGACCAACGAGTACAATGTCACCGTCATTGGTTAGTATCC  
ACGTCCACATCAAGCGTCATGCACCCGTTAC-  
AGACTAACATGGCAATACAGACGCTCCCGGTCACCGTGATTTTCATCAATGCTGCCTTCTGGTAT  
GTAGCCCCACCTACCTCGACAC-GGCTCAGCACGACG-  
CCTCCCGCAACTCTACAACACGACCTTCTCAAC---  
TATTTGGTTGGAACCCAGCGAAAGACTTGATACTGACCGGTCTTCGATAGGCAAACCATTTCTG  
GCGAGCACGGTCTCGACAGCAATGGAGTGTACGTACCCCTTCTTGGCTACTTGCTTTCCACG  
AACATGTTGGCTAACACACG-  
AGCTTGTCAGCTACAACGGTACCTCCGAGCTCCAGCTCGAGCGCATGAGCGTCTACTTCAACG  
AGGCTTCCGGCAACAAGTACGTTCTCGTGCCGTCTCGTCGATCTCGAGCCCGGTACCATGGA  
TGCCGTCCGCGCCGGTCTTTTCGGTCAGCTCTTCCGCCCTGACAACTTCGTCTTTGGTCAGTCCG  
GTGCT

>P\_arengae\_CBS\_331\_92

AGGGATCATTATAGAGTTTTCTAAACTCCCAACCCATGTGAACTTACC-  
ATTGTTGCCTCGGCAGAAGCTACCCTGTAGCGTCTTACCCGGGAACGGCCTACCCTGTAGCGCC  
TTACCCTGGAACGACCTACCCTGTAGCGGCTGCCGGTGGACTACTCAACTCTTGTTATTTTATGG  
TTATCTGAGCGTCTTATTTAATAAGTCAAACTTTCAACAACGGATCTCTTGGTTCTGGCATCGA  
TGAAGAACGCAGCGAAATGCGATAAGTAATGTGAATTGCAGAATTCAGTGAATCATCGAATCTT  
TGAACGCACATTGCGCCATTAGTATTCTAGTGGGCATGCCTGTTTCGAGCGTCATTTCAACCTT  
AAGCCTAGCTTAGTGTTGGGAGCCTACTG--  
CTTTTACTAGCTGTAGCTCCTGAAATACAACGGCGGACCTGCGATATCCTCTGAGCGTAGTAA-  
TTCTTTTCTCGTTTTGACTGGAGTTGCAGCGTCTTGGCCGCTAAACCCCC-AA-  
TTTTAATGGTTGACCTCAGGTTAGTCAT---CACGATCCC-ATCTTCA-----  
TCTTCATCAGCGCT----CAA----CAATCCATCATCTGGTGCCGAAAATCA-----  
TTTTTTCGCACCTTCC-CACGTTCTCTG--  
ACACTTACCCCGCCGCGTGGCCGCACGACCCCGCGGTGCCAACGAAAAATTTCTTA--  
TCACAGCCCCACCTCAC--AAACATTTTGGCAGCCACGCACTGT-  
CATGACCCACCATGAACCTATACTGACCCCGCCAAATAGGAAGCCGCGGAGCTCGGTAAGGGT  
TCCTTCAAGTACGCCTGGGTTCTTGACAAGCTCAAGGCCGAGCGTGAGCGTGGTATCACCATCG  
ATATCGCTCTCTGGAAGTTCGAGACCAACGAGTACAATGTCACCGTCATTGGTTAGTATCCCTGT  
CTACAACATGTATCATGCCTTCGACCTC-  
AGACTAACATGGTAATACAGACGCTCCCGGTCACCGTGACTTCATCAATGCTGCTTTCTGGTATG  
TACCC-TATATATCTCGACAC-GCCTCATTACGACG-  
CCTCCCGCAACCCGACCACGCGACATTCTCAAC---  
TACTCGGTTGGAATCACACGAAAGACTTGATACTGACCCGTCATTGATAGGCAAACCATCTCTG  
GCGAGCACGGTCTCGACAGCAATGGAGTGTACGTACCCCTTCTTGGCTGCTTGCT-----  
ACGAACATGTTAGCTGACACTCG-  
TGATTGTTTACGCTACAACGGTACCTCTGAGCTCCAGCTGGAGCGCATGAGCGTCTACTTCAACG  
AGGCTTCCGGCAACAAGTACGTTCTCGTGCCGTCTCGTCGATCTCGAGCCCGGTACCATGGA  
CGCCGTCCGTGCCGGTCTTTTCGGTCAGCTCTTCCGCCCTGACAACTTCGTCTTCCGGTCAGTCCG

GTGCC

>P\_australasiae\_CBS\_11141

AGGGATCATTATAGAGTTTTCTAAACTCCCAACCCATGTGAACTTACC-  
ATTGTTGCCTCGGCAGAAGCTGCTCGGT-  
GCACCCTACCTTGGAACGGCCTACCCTGTAGCGCCTTACCCTGGAACGGCTTACCCTGTAACGG  
CTGCCGGTGGACTACCAAACCTTTGTTATTTTATTGTAATCTGAGCGTCTTATTTAATAAGTCAA  
AACTTTCAACAACGGATCTCTTGGTTCTGGCATCGATGAAGAACGCAGCGAAATGCGATAAGTA  
ATGTGAATTGCAGAATTCAGTGAATCATCGAATCTTTGAACGCACATTGCGCCATTAGTATTCT  
AGTGGGCATGCCTGTTGAGCGTCATTTCAACCCTTAAGCCTAGCTTAGTGTGGGAGCCTACT  
G--  
CTTTTGCTAGCTGTAGCTCCTGAAATACAACGGCGGATCTGCGATATCCTCTGAGCGTAGTAAAT  
TTTTATCTCGCTTTTACTGGAGTTGCAGCGTCTTTGGCCGCTAAATCCCC-AA-  
TTTTAATGGTTGACCTCAGGTTAGTCATCCTCGCAATCCCCATCATCC-----TCATC-----  
CTCATTATCACCACCT--CGCAA---CA-TTCCACACC-GGTGCCGAAAATCTGG-----  
TTTTCGCACCTGCC-CATTTTCCCAG--ACACTTACCC-----  
GCCGCACGACCCCGCGGTGCAAACGAAAAATTTCTTA--  
TCACAGCCCCACATCACACAAACATTTTGGCAGCCACGCACTTTGCATGACCCACAATGAACAA  
TTGCTGACCCCGCAAATAGGAAGCCGCGGAGCTCGGAAAGGGTTCCTTCAAGTACGCATGGG  
TTCTTGACAAGCTCAAGGCCGAGCGTGAGCGTGGTATCACCATTGATATCGCTCTCTGGAAGTT  
CGAGACCAACGAGTACAATGTCACCGTCATCGGTTAGTATCCCTGTCCACAACATGTGTCATGT  
CTCTGAACTCAAGACTAACCTTGCAATACAGACGCTCCCGGTCACCGTGATTTTCAATGCTG  
CCTTCTGGTATGTAGCC-CATCTACCTCGACGC-GCCTCAATACGACA-  
CCCCCGGCAACTCGGCAAC--GACATTCTCAA---  
TGCTTGTGGTGGAAACCATACGAAAGACTTGATACTGACCGGCCTATGATAGGCAAACCATCTCTG  
GCGAGCACGGTCTCGACAGCAATGGAGGTACGTACCCTTCCCTGGCTACTCGCTTCCCGTG  
AACATGTCAGCTAACAGTCG-  
TGCTTGTGCAGCTACAACGGTACCTCCGAGCTCCAGCTCGAGCGCATGAGCGTCTACTTCAACG  
AGGCTTCCGGCAACAAGTACGTTCTCGTGCCGCTCTCGTATCTCGAGCCCGGTACCATGGA  
TGCCGTCCGCGCCGGTCTTTCCGGTCAGCTCTCCGCCCTGACAACTTCGTCTTCGGTCAGTCCG  
GTGCC

>P\_australasiae\_CBS\_114126

AGGGATCATTATAGAGTTTTCTAAACTCCCAACCCATGTGAACTTACC-  
ATTGTTGCCTCGGCAGAAGCTGCTCGGT-  
GCACCCTACCTTGGAACGGCCTACCCTGTAGCGCCTTACCCTGGAACGGCTTACCCTGTAACGG  
CTGCCGGTGGACTACCAAACCTTTGTTATTTTATTGTAATCTGAGCGTCTTATTTAATAAGTCAA  
AACTTTCAACAACGGATCTCTTGGTTCTGGCATCGATGAAGAACGCAGCGAAATGCGATAAGTA  
ATGTGAATTGCAGAATTCAGTGAATCATCGAATCTTTGAACGCACATTGCGCCATTAGTATTCT  
AGTGGGCATGCCTGTTGAGCGTCATTTCAACCCTTAAGCCTAGCTTAGTGTGGGAGCCTACT  
G--  
CTTTTGCTAGCTGTAGCTCCTGAAATACAACGGCGGATCTGCGATATCCTCTGAGCGTAGTAAAT  
TTTTATCTCGCTTTTACTGGAGTTGCAGCGTCTTTGGCCGCTAAATCCCC-AA-  
TTTTAATGGTTGACCTCAGGTTAGTCATCCTCGCAATCCCCATCATCC-----TCATC-----  
CTCATTATCACCACCT--CGCAA---CA-TTCCACACC-GGTGCCGAAAATCTGG-----  
TTTTCGCACCTGCC-CATTTTCCCAG--ACACTTACCC-----



GCCGCACGACCCCGCGGTGCAAACGAAAAATTTCTTA--  
TCACAGCCCCACATCACACAAACATTTTGGCAGCCACGCACTTTGCATGACCCACAATGAACAA  
TTGCTGACCCCGCCAAATAGGAAGCCGCCGAGCTCGGAAAGGGTTCCTTCAAGTACGCATGGG  
TTCTTGACAAGCTCAAGGCCGAGCGTGAGCGTGGTATCACCATTGATATCGCTCTCTGGAAGTT  
CGAGACCAACGAGTACAATGTCACCGTCATTGGTTAGCATCCCTGTCCACAACATGTGTCATGT  
CTCTGAACTCAAGACTAACCTTGCAATACAGACGCTCCCGGTCACCGTGATTTTCATCAATGCTG  
CCTTCTGGTATGTAGCC-CATCTACCTCGACGC-GCCTCAATACGACA-  
CCCCCGCAACTCGGCAAC--GACATTCTCAA---  
TGCTTGTGGAAACCATACGAAAGACTTGATACTGACCGGCCTATGATAGGCAAACCATCTCTG  
GCGAGCACGGTCTCGACAGCAATGGAGGTACGTACCCCTTCCCTGGCTACTCGCTTCCCGTG  
AACATGTCAGCTAACAGTCG-  
TGCTTGTGCAGCTACAACGGTACCTCCGAGCTCCAGCTCGAGCGCATGAGCGTCTACTTCAACG  
AGGCTCCGGCAACAAGTACGTTCCCTCGTGCCGTCTCGTCGATCTCGAGCCCGGTACCATGGA  
TGCCGTCCGCGCCGGTCTTTCGGTCAGCTCTCCGCCCTGACAACTTCGTCTTCGGTCAGTCCG  
GTGCC

>P\_australis\_CBS\_114193

AGGGATCATTATAGAGTTTTCTAAACTCCCAACCCATGTGAACTTACC-  
ATTGTTGCCTCGGCAGAAGCTACCTGGT--  
TACCCTACCTTGGAAACGGCCTACCCTGTAGCGCCTTACCCTGGAACGGCCTACCCTGTAACGGC  
TGCCGGTGGACTACCAAACCTTGTATTATTTATTGTAATCTGAGCGTCTTATTTAATAAGTCAA  
ACTTTCAACAACGGATCTTGGTTCTGGCATCGATGAAGAACGCAGCGAAATGCGATAAGTAA  
TGTGAATTGCAGAATTCAGTGAATCATCGAATCTTTGAACGCACATTGCGCCCATTAGTATTCTA  
GTGGGCATGCCTGTTTCGAGCGTCATTTCAACCCTAAGCCTAGCTTAGTGTGGGAGCCTACTG-  
-CTTTTGCTAGCGGTAGCTCCTGAAATACAACGGCGGATCTGCGATATCCTCTGAGCGTAGTAA-  
ATTTTATCTCGCTTTTGACTGGAGTTGCAGCGTCTTTAGCCGCTAAACCCCC-  
AATTTTTAATGGTTGACCTCAGGTTAG---TCCTCACAATCCC-ATCATT-----CCATC-----  
-----CTCATCATCGCT--CGCACA----CA---TTCCAACC-GGTGCCGAAAATTT-G-----  
TTTTCGCACCTGCC-CATTTTCCCAG--ACACTTACCC-----

GCCGCACGACCCCGCGGTGCAAACGAAAAATTTCTTA--  
TCACAGCCCCACATCACACAAACATTTTGGCAGCCATGCACTTTCCAGGACCCACAATGAACAA  
TTGCTGACCCCGCCAAATAGGAAGCCGCCGAGCTCGGAAAGGGTTCCTTCAAGTACGCATGGG  
TTCTTGACAAGCTCAAGGCCGAGCGTGAGCGTGGTATCACCATTGATATCGCTCTCTGGAAGTT  
CGAGACCAACGAGTACAATGTCACCGTCATTGGTTAGTAACCCTGTCCATGCGATGTACCATGC  
GTCTGAATGT-  
ATGCTAACATGGCAACACAGATGCTCCCGGTCACCGTGATTTTCATCAATGCTGCCTTTTGGTATG  
TAGCC-CATCTACCTCGACAC-GCCTCAATACGACAACCCCGCAATTCGACAAC--  
GACGTTCTCAACGACTGCTTGATTGAAACAAGGGAAAGACTTGATACTGACCGGTCCCTGATA  
GGCAAACCATCTCTGGCGAGCACGGTCTCGACAGCAATGGAGGTACGTACCCCTTCCCTGGCT  
ACTTGCTTTGCCACGAACATCTCAGCTAACACTCG-  
TGGTTGTTGAGCTACAACGGTACCTCCGAGCTCCAGCTCGAGCGCATGAGCGTCTACTTCAACG  
AGGCTCCGGCAACAAGTACGTTCCCTCGTGCCGTCTCGTCGATCTCGAGCCCGGTACCATGGA  
CGCCGTCCGCGCCGGTCTTTCGGTCAGCTCTCCGCCCTGACAACTTCGTCTTCGGTCAGTCCG  
GTGCC

>P\_biciliata\_CAA1011

AGGGATCATTATAGAGTTTTCTAAACTCCCAACCCATGTGAACTTACC-  
ATTGTTGCCTCGGCAGAAGCTGCTCGGT-  
ACACCTTACCTTGAACGGCCTACCCTGTAGCGCCTTACCCTGGAACGGCTTACCCTGTAACGG  
CTGCCGGTGGACTACCAAACCTTTGTTATTTTATTGTAATCTGAGCGTCTTATTTTAATAAGTCAA  
AACTTTCAACAACGGATCTCTTGGTTCTGGCATCGATGAAGAACGCAGCGAAATGCGATAAGTA  
ATGTGAATTGCAGAATTCAGTGAATCATCGAATCTTTGAACGCACATTGCGCCATTAGTATTCT  
AGTGGGCATGCCTGTTTCGAGCGTCATTTCAACCCTTAAGCCTAGCTTAGTGTGGGAGCCTACT  
G--

CTTTTACTAGCTGTAGCTCCTGAAATACAACGGCGGATCTGCGATATCCTCTGAGCGTAGTAA-  
TTTTTATCTCGCTTTTACTGGAGTTGCAGCGTCTTTAGCCGCTAAATCCCC-AA-  
TTTTAATGGTTGACCTCAGGTTAGTCATCCTCGCAATCCC-ATCATCC-----CCATC-----  
CTCATCAACATCACCT--CGCAA---CA-TTCCACACC-GGTGCCGAAAATCTGG-----  
TTCCGCACCTCC-CATTTCCAG--ACACTTACCC-----  
GCCGCACGACCCCGCGGTGCAAACGAAAAATTTCTTA--TCGCAGCCCCACATCAC--  
AAACGTTTTGGCAGCCACGCACTTTGCATGACCCACAATGAACAATTGCTGACCCCGCCAAATA  
GGAAGCCGCCGAGCTCGGAAAGGGTTCCTTCAAGTACGCATGGGTTCTTGACAAGCTCAAGGC  
CGAGCGTGAGCGTGGTATCACCATTGATATCGCTCTCTGGAAGTTCGAGACCAACGAGTACAAT  
GTCACCGTCATTGGTTAGTATCCCTGTCCACAACATGTGTCATGTCACCGAACTCAAGACTAACC  
TTGCAATACAGACGCTCCCGGTCACCGTGATTCATCAA?????????TGGTATGTAGCC-  
CATCTACCTCGACGC-GCCTCGATACGACA-CCCCGGCAACTCGACAAC--GACATTCTCAAC-  
--

TGCTTGTGGAAACCATACGAAAGACTTGATACTGACCGGTCTATGATAGGCAAACCATCTCTG  
GCGAGCACGGTCTCGACAGCAATGGAGGTACGTACCCTTTCCCTGGCTACTCGCTTCTCGTG  
AACATGTCAGCTAACAGTCG-  
TGCTTGTTCAGCTACAACGGTACCTCCGAGCTCCAGCTCGAGCGCATGAGCGTCTACTTCAACG  
AGGCTCCGGCAACAAGTACGTTCCCTCGTGCCGTCTCGTATCTCGAGCCCGGTACCATGGA  
TGCCGTCCGCGCCGGTCTTTCCGGTCACTCTCCGCCCTGACAACTTCGTTTTCCGGTCACTCCG  
GTGCC

>P\_biciliata\_CBS\_124463

AGGGATCATTATAGAGTTTTCTAAACTCCCAACCCATGTGAACTTACC-  
ATTGTTGCCTCGGCAGAAGCTGCTCGGT-  
ACACCTTACCTTGAACGGCCTACCCTGTAGCGCCTTACCCTGGAACGGCTTACCCTGTAACGG  
CTGCCGGTGGACTACCAAACCTTTGTTATTTTATTGTAATCTGAGCGTCTTATTTTAATAAGTCAA  
AACTTTCAACAACGGATCTCTTGGTTCTGGCATCGATGAAGAACGCAGCGAAATGCGATAAGTA  
ATGTGAATTGCAGAATTCAGTGAATCATCGAATCTTTGAACGCACATTGCGCCATTAGTATTCT  
AGTGGGCATGCCTGTTTCGAGCGTCATTTCAACCCTTAAGCCTAGCTTAGTGTGGGAGCCTACT  
G--

CTTTTACTAGCTGTAGCTCCTGAAATACAACGGCGGATCTGCGATATCCTCTGAGCGTAGTAA-  
TTTTTATCTCGCTTTTACTGGAGTTGCAGCGTCTTTAGCCGCTAAATCCCC-AA-  
TTTTAATGGTTGACCTCAGGTTAGTCATCCTCGCAATCCC-ATCATCC-----CCATC-----  
CTCATCAACATCACCT--CGCAA---CA-TTCCACACC-GGTGCCGAAAATCTGG-----  
TTCCGCACCTGCC-CATTTCCAG--ACACTTACCC-----  
GCCGCACGACCCCGCGGTGCAAACGAAAAATTTCTTA--TCGCAGCCCCACATCACA-  
AAACGTTTTGGCAGCCACGCACTTTGCATGACCCACAATGAACAATTGCTGACCCCGCCAAATA

GGAAGCCGCCGAGCTCGGAAAGGGTTCCTTCAAGTACGCATGGGTTCCTTGACAAGCTCAAGGC  
CGAGCGTGAGCGTGGTATCACCATTGATATCGCTCTCTGGAAGTTCGAGACCAACGAGTACAAT  
GTCACCGTCATTGGTTAGTATCCCTGTCCACAACATGTGTCATGTCACCGAACTCAAGACTAACC  
TTGCAATACAGACGCTCCCGGTACCGTGATTCATCAATGCTGCCTTCTGGTATGTAGCC-  
CATCTACCTCGACGC-GCCTCGATACGACA-CCCCGGCAACTCGACAAC--GACATTCTCAAC-  
--

TGCTTGTTTGAACCATACGAAAGACTTGATACTGACCGGTCTATGATAGGCAAACCATCTCTG  
GCGAGCACGGTCTCGACAGCAATGGAGGTACGTACCCTTCCCTGGCTACTCGCTTCTCGTG  
AACATGTCAGCTAACAGTCG-

TGCTTGTTTCAAGCTACAACGGTACCTCCGAGCTCCAGCTCGAGCGCATGAGCGTCTACTTCAACG  
AGGCTTCCGGCAACAAGTACGTTCTCGTGCCGTCTCGTATCTCGAGCCCGGTACCATGGA  
TGCCGTCCGCGCCGGTCTTTCGGTCAGCTCTCCGCCCTGACAACTTCGTTTTCGGTACGTCGG  
GTGCC

>P\_brachiata\_LC2988

????????????????????????????????????????????????????????????ACCCATGTGAACCTTACC-

ATTGTTGCCTCGGCAGAAGCTGCTCGGT-

GCACCCTACCTTGAACGGCCTACCCTGTAGCGCCTTACCCTGGAACGGCCTACCCTGTAGCGG  
CTGCCGGTGGACTACCAAACCTTTGTTATTTTATTGTAATCTGAGCGTCTTATTTAATAAGTCAA  
AACTTTCAACAACGGATCTTGGTTCTGGCATCGATGAAGAACGCAGCGAAATGCGATAAGTA  
ATGTGAATTGCAGAATTCAGTGAATCATCGAATCTTTGAACGCACATTGCGCCATTAGTATTCT  
AGTGGGCATGCCTGTTGAGCGTCATTTCAACCCTTAAGCCTAGCTTAGTGTGGGAGCCTACT  
G--

CTTTTGCTAGCTGTAGCTCCTGAAATACAACGGCGGATCTGCGATATCCTCTGAGCGTAGTAA-  
TTTTTATCTCGTTTTGACTGGAGTTGCAGCGTCTTAGCCGCTAAATCCCC-AA-

TTTTAATGGTTGACCTCAGGTTAGTCATCCTCGCAATCCC-ATCATCC-----TCATC-----  
CTCATCATCACCACCT--CGCAA----CG-TTGCCACACC-GGTGGCGAAAATCTGG-----  
---TTTTCGCACCTGCC-CATTTTCCCAG--ACACTTACCCC-----

GCCGCACGACCCCGCGGTGCAAACGAAAAATTTCTTA--

TCATAGCCCCACATCACACAAACATTTTGGCAGCCACGCACTTTGCATGACCCACAATGAACAA  
TTGCTGACCCCGCAAATAGGAAGCCGCGAGCTCGGAAAGGGTTCCTTCAAGTACGCATGGG  
TTCTTGACAAGCTCAAGGCCGAGCGTGAGCGTGGTATCACCATTGATATCGCTCTCTGGAAGTT  
CGAGACCAACGAGTACAATGTCACCGTCATTGGTTAGTATCCCTGTCCACAACATGTGTCATGT  
CTCCAAACTCAAGACTAACCTTGCAATACAGACGCTCCCGGTACCGTGATTCATCAATGCTG  
CCTTCTGGTATGTAGCC-CATCTACCTCGACGC-GCCTCGATACGACA-

CCCCGGCAACTCGACAAC--GACATTCTCAAC---

TGCTTGTTTGAACCATACGAAAGACTTGATACTGACCGGTCTATGATAGGCAAACCATCTCTG  
GCGAGCACGGTCTCGACAGCAATGGAGGTACGTACCCTTCCCTGGCTACTCGCTTCTCGTG  
AACATGTCAGCTAACAGTCG-

TGCTTGTTTCAAGCTACAACGGTACCTCCGAGCTCCAGCTCGAGCGCATGAGCGTCTACTTCAACG  
AGGCTTCCGGCAACAAGTACGTTCTCGTGCCGTCTCGTATCTCGAGCCCGGTACCATGGA  
TGCCGTCCGCGCCGGTCTTTCGGTCAGCTCTCCGCCCTGACAACTTCGTTTTCGGTACGTCGG  
GTGCC

?????

>P\_brachiata\_LC8189

AGGGATCATTATAGAGTTTTCTAAACTCCCAACCCATGTGAACCTTACC-

ATTGTTGCCTCGGCAGAAGCTGCTCGGT-  
GCACCCTACCTTGGAACGGCCTACCCTGTAGCGCCTTACCCTGGAACGGCCTACCCTGTAGCGG  
CTGCCGGTGGACTACCAAACCTTTGTTATTTTATTGTAATCTGAGCGTCTTATTTTAATAAGTCAA  
AACTTTCAACAACGGATCTCTTGTTCTGGCATCGATGAAGAACGCAGCGAAATGCGATAAGTA  
ATGTGAATTGCAGAATTCAGTGAATCATCGAATCTTTGAACGCACATTGCGCCCATTAGTATTCT  
AGTGGGCATGCCTGTTGAGCGTCATTTCAACCCTTAAGCCTAGCTTAGTGTGGGAGCCTACT  
G--  
CTTTTGCTAGCTGTAGCTCCTGAAATACAACGGCGGATCTGCGATATCCTCTGAGCGTAGTAA-  
TTTTATCTCGCTTTTACTGGAGTTGCAGCGTCTTAGCCGCTAAATCCCC-AA-  
TTTTAATGGTTGACCTCAGGTTAGTCATCCTCGCAATCCC-ATCATCCTCATCCTCATC-----  
---ATCATACCACCT--CGCAA----CG-TTGCCACACC-GGTGGCGAAAATCTGG-----  
TTTTCGCACCTGCC-CATTTTCCCAG--ACACTTACCCC-----  
GCCGCACGACCCCGCGGTGCAAACGAAAAATTTCTTA--  
TCATAGCCCCACATCACACAAACATTTTGGCAGCCACGCACTTTGCATGACCCACAATGAACAA  
TTGCTGACCCCGCCAAATAGGAAGCCGCCGAGCTCGGAAAGGGTTCCTTCAAGTACGCATGGG  
TTCTTGACAAGCTCAAGGCCGAGCGTGAGCGTGGTATCACCATTGATATCGCTCTCTGGAAGTT  
CGAGACCAACGAGTACAATGTCACCGTCATTGGTTAGTATCCCTGTCCACAACATGTGTCATGT  
CTCCAAACTCAAGACTAACCTTGCAATACAGACGCTCCCGGTACCGTGATTTTCATCAATGCTG  
CCTTCTGGTATGTAGCC-CATCTACCTCGACGC-GCCTCGATACGACA-  
CCCCCGGCAACTCGACAAC--GACATTCTCAAC---  
TGCTTGTGGAAACCATAACGAAAGACTTGATACTGACCGGTCTATGATAGGCAAACCATCTCTG  
GCGAGCACGGTCTCGACAGCAATGGAGGTACGTACCCTTCCCTGGCTACTCGCTTCTCGTG  
AACATGTCAGCTAACAGTCG-  
TGCTTGTTCAGCTACAACGGTACCTCCGAGCTCCAGCTCGAGCGCATGAGCGTCTACTTCAACG  
AGGCTTCCGGCAACAAGTACGTTCCCTCGTGCCGTCTCGTCGATCTCGAGCCCGGTACCATGGA  
TGCCGTCCGCGCCGGTCTTTCGGTCAGCTCTTCCGCCCTGACAACCTCGTTTTCGGTGAGTCCG  
GTGCC

>P\_brassicae\_CBS\_170\_26

?????CATTATAGAGTTTTCTAAACTCCCAACCCATGTGAACTTACC-  
ATTGTTGCCTCGGCAGAAGCTACCTGGT--  
TACCCTACCTTGGAACGGCCTACCCTGTAGCGCCTTACCCTGGAACGGCCTACCCTGTAACGGC  
TGCCGGTGGACTACCAAACCTTTGTTATTTTATTGTAATCTGAGCGTCTTATTTTAATAAGTCAA  
ACTTTCAACAACGGATCTCTTGTTCTGGCATCGATGAAGAACGCAGCGAAATGCGATAAGTAA  
TGTGAATTGCAGAATTCAGTGAATCATCGAATCTTTGAACGCACATTGCGCCCATTAGTATTCTA  
GTGGGCATGCCTGTTGAGCGTCATTTCAACCCTTAAGCCTAGCTTAGTGTGGGAGCCTACCG-  
-CTTTTGCTAGCGGTAGCTCCTGAAATACAACGGCGGATCTGCGATATCCTCTGAGCGTAGTAA-  
TTTTATCTCGCTTTTACTGGAGTTGCAGCGTCTTAGCCGCTAAACCCCAAATTTTTTAATG  
GTTGACCTC????????ATCCACACAATCCC-ATCATT-----  
CCACCATTCCCATCTTATCATCATCGCCT----CAA-----CA-TCTTCCAACC-  
GGTGCCGAAAATCT-G-----TTTTCGCACCTGCC-CATTTTCCCAG--ACACTTACCCC-----  
---GCCGCACGACCCCGCGGTGCAAACGAAAAATTTCTTA--  
TCACAGCCCCACATCGCACAAACATTTTGGCAGCCATGCACTTTCCAAGACCCACAATGAACAA  
TTGCTGACCCCGCCAAATAGGAAGCCGCCGAGCTCGGAAAGGGTTCCTTCAAGTACGCATGGG  
TTCTTGACAAGCTCAAGGCCGAGCGTGAGCGTGGTATCACCATTGATATCGCTCTCTGGAAGTT

CGAGACCAACGAGTACAATGTCACCGTCATTGGTTAGTATCCCTGCCACACCATGTATCATGC  
ATCCGACCTT-  
GTGCTAACATGGCAACACAGATGCTCCCGGTCACCGTGACTTCATCAA?????????????  
????????????????????????????????????????????????????????????  
????????????????????????????????????????????????????????????  
????????????????????????????????????????????????????????????  
????????????????????????????????????????????????????????????  
????????????????????????????????????????????????????????????  
????????????????????????????????????????????????????????????  
????????????????????????????????????????????????????????????

>P\_camelliae\_MFLUCC\_12\_0277

?????CATTATAGAGTTTTTAAACTCCCAACCCATGTGAACTTACC-  
ATTGTTGCCTCGGCAGAAGCTACCCGGT---  
ACCTTACCTTGAACGGCCTACCCTGTAGCGCCTTACCCTGGAACGGCTTACCCTGCAGCGGCT  
GCCGGTGGACTACCAAACCTTTGTTATTTTATGTTATCTGAGCGTCTATTTAATAAGTCAAAA  
CTTTCAACAACGGATCTCTTGGTTCTGGCATCGATGAAGAACGCAGCGAAATGCGATAAGTAAT  
GTGAATTGCAGAATTCAGTGAATCATCGAATCTTTGAACGCACATTGCGCCATTAGTATTCTAG  
TGGGCATGCCTGTTGAGCGTCATTTCAACCCTAAGCCTAGCTTAGTGTGGGAGCCTACTG--  
CTTTTGTAGCTGTAGCTCCTGAAATACAACGGCGGATCTGCGATATCCTCTGAGCGTAGTAATT  
TTTTCTCGCTTTTACTGGAGTTGCAGCGTCTTTAGCCGCTAAACCCCCC-AA--  
TTTTAATGGTTGACCTCAGGATAGTTATCCTCACAATTCC-ATCATCC-----TCACT-  
----ATCATTACCT--CGCAA---TA-CTTCAAACC-GGTGTGCGAAAATAT-  
GTGCTTCTTTTTTCGCGCCTGCC-CACATCCCAG--ACACTTACCC-----  
GCCGCACGACCCCGCGGTGCAAACGAAAAATTTCTTA--  
TCACAGCCCCACACCGCACAAACATTTTGGCAGCCATGCACTTTTCATAACCCAC-  
ACGAGCATTGCTGACCCCGCCAAATAGGAAGCCGCGGAGCTCGGAAAGGGTTCCTTCAAGTA  
CGCATGGGTTCTTGACAAGCTCAAGGCCGAGCGTGAGCGTGGTATCACCATCGATATCGCTCTC  
TGGAAGTTCGAGACCAACGAGTACAATGTCACCGTCATTGGTTAGTATCCCTGTCC---  
ACATCCATCATGCATCCGAAATC-  
AGACTAACACGGCACCACAGATGCTCCCGGTCACCGTGATTTTCATCAATGCTGCTTTCTGGTAT  
GTAGCT-CATCTACCTCGACGC-GCCTCAGCACGACG-CCTCTCGCAACTCGACAAC--  
GACGTTATCAAC---  
TACTTGGTTGAAACCAAGCGAAAGACTTGATACTGACAGGCCTCTGATAGGCAAACCATCTCTG  
GCGAGCACGGTCTCGACAGCAATGGAGTGTACGTACCGTACCCTTGGCTACCTGCT-  
TCCCACGAACATGTCAGCTAACACTCG----  
TGGTTCAGCTACAACGGTACCTCCGAGCTCCAGCTCGAGCGCATGAGCGTCTACTTCAACGAGG  
CTTCCGGCAACAAGTACGTTCCCTCGTGCCGTCCTCGTATCTCGAGCCCGGTACCATGGATGC  
CGTCCGCGCCGGTCTTTTCGGTACGCTCTCCGCCCTGACAACTTCGTCTTCGGTACGTCGGTG  
CC

>P\_camelliae\_oleiferae\_CSUFTCC08

????????????????????????????????????????????TGTGAACTTACC-  
ATTGTTGCCTCGGCAGAAGCTGCTCGGT-  
GCACCCTACCTTGAACGGCCTACCCTGTAGCGCCTTACCCTGGAACGGCTTACCCTGTAGCGG  
CTGCCGGTGGACTACTAAACTCTTGTATTTTATTGTAATCTGAGCGTCTATTTAATAAGTCAA  
AACTTTCAACAACGGATCTCTTGGTTCTGGCATCGATGAAGAACGCAGCGAAATGCGATAAGTA  
ATGTGAATTGCAGAATTCAGTGAATCATCGAATCTTTGAACGCACATTGCGCCATTAGTATTCT

AGTGGGCATGCCTGTTGAGCGTCATTTCAACCCTTAAGCCTAGCTTAGTGTGGGAGCCTACT  
G--  
CTTTTACTAGCTGTAGCTCCTGAAATACAACGGCGGATCTGCGATATCCTCTGAGCGTAGTAA-  
TTTTTATCTCGCTTTTGACTGGAGTTGCAGCGTCTTAGCCGCTAAATCCCC-AA-  
TTTTTAATGGTTGACCTCAGGTTAGTCATCCTCGCAATCCC-ATCATCC-----CCATC-----  
CTCATCAACATCACCT--CGCAA----CA-TTCCACACC-GGTGCCGAAAATCTGG-----  
TTCCGCACCTGCC-CATTTTCCCAG--ACACTTACCC-----  
GCCGCACGACCCCGCGGTGCAAACGAAAAATTTCTTA--TCGCAGCCCCACATCAC--  
AAACGTTTTGGCAGCCACGCACTTTGCATGACCCACAATGAACAATTGCTGACCCCGCCAAATA  
GGAAGCCGCCGAGCTCGGAAAGGGTTCCTTCAAGTACGCATGGGTTCTTGACAAGCTCAAGGC  
CGAGCGTGAGCGTGGTATCACCATTGATATCGCTCTCTGGAAGTTCGAGACCAACGAGTACAAT  
GTCACCGTCATTGGTTAGTATCCCTGTCCACAACATGTGTCATGTCACCGAACTCAAGACTAACC  
TTGCAATACAGACGCTCCCGGTACCGTGATTTCAATGCTGCCTTCTGGTATGTAGCC-  
CATCTACCTCGACGC-GCCTCAATACGACA-CCCCGGCAACTCGACAAC--GACATTCTCAAC-  
--  
TGCTTGTTTGAACCATACGAAAGACTTGATACTGACCGGTCTATGATAGGCAAACCATCTCTG  
GCGAGCACGGTCTCGACAGCAATGGAGGTACGTACCCTTCCCTGGCTACTCGCTTCTCGTG  
AACATGTCAGCTAACAGTTG-  
TGCTTGTTGAGCTACAACGGTACCTCCGAGCTCCAGCTCGAGCGCATGAGCGTCTACTTCAACG  
AGGCTCCGGCAACAAGTACGTTCTCGTGCCGTCTCGTCGATCTCGAGCCCGGTACCATGGA  
TGCCGTCCGCGCCGGTCTTTCGGTCAGCTCTCCGCCCTGACAACTTCGTCTTCGGTCAGTCCG  
GTGCC  
>P\_camelliae\_oleiferae\_CSUFTCC09  
????????????????????????????????????TGTGAACTTACC-  
ATTGTTGCCTCGGCAGAAGCTGCTCGGT-  
GCACCCTACCTTGAACGGCCTACCCTGTAGCGCCTTACCCTGGAACGGCTTACCCTGTAGCGG  
CTGCCGGTGGACTACTAACTCTTGTATTTTATTGTAATCTGAGCGTCTATTTAATAAGTCAA  
AACTTTCAACAACGGATCTTGGTTCTGGCATCGATGAAGAACGCAGCGAAATGCGATAAGTA  
ATGTGAATTGCAGAATTCAGTGAATCATCGAATCTTTGAACGCACATTGCGCCATTAGTATTCT  
AGTGGGCATGCCTGTTGAGCGTCATTTCAACCCTTAAGCCTAGCTTAGTGTGGGAGCCTACT  
G--  
CTTTTACTAGCTGTAGCTCCTGAAATACAACGGCGGATCTGCGATATCCTCTGAGCGTAGTAA-  
TTTTTATCTCGCTTTTGACTGGAGTTGCAGCGTCTTAGCCGCTAAATCCCC-AA-  
TTTTTAATGGTTGACCTCAGGTTAGTCATCCTCGCAATCCC-ATCATCC-----CCATC-----  
CTCATCAACATCACCT--CGCAA----CA-TTCCACACC-GGTGCCGAAAATCTGG-----  
TTCCGCACCTGCC-CATTTTCCCAG--ACACTTACCC-----  
GCCGCACGACCCCGCGGTGCAAACGAAAAATTTCTTA--TCGCAGCCCCACATCAC--  
AAACGTTTTGGCAGCCACGCACTTTGCATGACCCACAATGAACAATTGCTGACCCCGCCAAATA  
GGAAGCCGCCGAGCTCGGAAAGGGTTCCTTCAAGTACGCATGGGTTCTTGACAAGCTCAAGGC  
CGAGCGTGAGCGTGGTATCACCATTGATATCGCTCTCTGGAAGTTCGAGACCAACGAGTACAAT  
GTCACCGTCATTGGTTAGTATCCCTGTCCACAACATGTGTCATGTCACCGAACTCAAGACTAACC  
TTGCAATACAGACGCTCCCGGTACCGTGATTTCAATGCTGCCTTCTGGTATGTAGCC-  
CATCTACCTCGACGC-GCCTCAATACGACA-CCCCGGCAACTCGACAAC--GACATTCTCAAC-  
--

TGCTTGTTTGAACCATACGAAAGACTTGATACTGACCGGTCTATGATAGGCAAACCATCTCTG  
GCGAGCACGGTCTCGACAGCAATGGAGTGTACGTACCCTTCCCTGGCTACTCGCTTCTCGTG  
AACATGTCAGCTAACAGTTG-  
TGCTTGTTTACAGCTACAACGGTACCTCCGAGCTCCAGCTCGAGCGCATGAGCGTCTACTTCAACG  
AGGCTTCCGGCAACAAGTACGTTCTCGTGCCGTCTCGTCGATCTCGAGCCCGGTACCATGGA  
TGCCGTCCGCGCCGGTCTTCCGGTCAGCTCTTCCGCCCTGACAACTTCGTCTTCCGGTCAGTCCG  
GTGCC

>P\_chamaeropsis\_CBS\_186\_71

AGGGATCATTATAGAGTTTTTAAACTCCCAACCCATGTGAACTTACC-  
ATTGTTGCCTCGGCAGAAGCTACCTGGT--  
TACCTTACCTTGAACGGCCTACCCTGTAGCGCCTTACCCTGGAACGGCCTACCCTGTAACGGC  
TGCCGGTGGACTACCAAACCTTGTATTTTTATTGTAATCTGAGCGTCTTATTTAATAAGTCAA  
ACTTTCAACAACGGATCTCTTGGTTCTGGCATCGATGAAGAACGCAGCGAAATGCGATAAGTAA  
TGTGAATTGCAGAATTCAGTGAATCATCGAATCTTTGAACGCACATTGCGCCCATTAGTATTCTA  
GTGGGCATGCCTGTTTCGAGCGTCATTTCAACCCTTAAGCCTAGCTTAGTGTGGGAGCCTACTG-  
-CTTTTGCTAGCGGTAGCTCCTGAAATACAACGGCGGATCTGCGATATCCTCTGAGCGTAGTAA-  
TTTTATCTCGCTTTGACTGGAGTTGCAGCGTCTTAGCCGCTAAACCCCCC-AA-  
TTTTAATGGTTGACCTCAGGTTAGTCATCCTCAA- TCCC-ATCATT-CCATC-----  
CTCATCATCATCGCCT--CGCAA---CA-TTTCCAACC-GGTGCCGAGAATCT-G-----  
TTTTCGCATCTGCC-CATTTCCAG--ACACTTACCC-  
GCCGCACGACCCCGCGGTGCAAACGAAAAAATTCTTA--  
TCACAGCCCCACATCGCACAAACATTTTGGCAGCCATGCACTTTCCAAGACCCACAATGAACAT  
TTGCTGACCCCGCAAATAGGAAGCCGCGAGCTCGGAAAGGGTTCCTTCAAGTACGCATGGG  
TTCTTGACAAGCTCAAGGCCGAGCGTGAGCGTGGTATCACCATCGATATCGCTCTCTGGAAGTT  
CGAGACCAACGAGTACAATGTCACCGTCATTGGTTAGTATCCCTGTCCACACGATGTACTATGC  
ATCTGAATGT-  
ATACTAACATGGCAACACAGATGCTCCCGGTACCCGTGATTTTCATCAATGCTGCCTTTTGGTATG  
TAGCC-CATCTACCTCGACAC-GCCTCAATACGACAACCCCGCAACTCGACAAC--  
GACGTTCTCAACAAGTGCTTGCTTGGAAACAAGGGAAAGACTTGATACTGACCGGTCCCTGATA  
GGCAAACCATCTCTGGCGAGCACGGTCTCGACAGCAATGGAGTGTACGTACCCTTCCCTGGCT  
ACTTGCTTTCCACGAACATCTCAGCTAACACTCG-  
TGGTTGTTTACAGCTACAACGGTACCTCCGAGCTCCAGCTCGAGCGCATGAGCGTCTACTTCAACG  
AGGCTTCCGGCAACAAGTACGTTCTCGTGCCGTCTCGTCGATCTCGAGCCCGGTACCATGGA  
TGCCGTCCGCGCCGGTCTTCCGGTCAGCTCTTCCGCCCTGACAACTTCGTCTTCCGGTCAGTCCG  
GTGCC

>P\_chinensis\_MFLUCC\_12\_0273

?????CATTATAGAGTTTTCTAAACTCCCAACCCATGTGAACTTACC-  
ATTGTTGCCTCGGCAGAAGCTACCTGGT--  
TACCCTACCTTGAACGGCCTACCCTGTAGCGCCTTACCCTGGAACGGCCTACCCTGTAACGGC  
TGCCGGTGGACTACCAAACCTTGTATTTTTATTGTAATCTGAGCGTCTTATTTAATAAGTCAA  
ACTTTCAACAACGGATCTCTTGGTTCTGGCATCGATGAAGAACGCAGCGAAATGCGATAAGTAA  
TGTGAATTGCAGAATTCAGTGAATCATCGAATCTTTGAACGCACATTGCGCCCATTAGTATTCTA  
GTGGGCATGCCTGTTTCGAGCGTCATTTCAACCCTTAAGCCTAGCTTAGTGTGGGAGCCTACCG-  
-CTTTTGCTAGCGGTAGCTCCTGAAATACAACGGCGGATCTGCGATATCCTCTGAGCGTAGTAA-

TTTTATCTCGCTTTTGACTGGAGTTGCAGCGTCTTAGCCGCTAAACCCCCAAATTTTAAATG  
GTTGACCTC????????????????????????????????????????????????????????  
????????????????????????????????????????????????????????????????  
????????????????????????????????????????????????????????????????  
????????????????????????????????????????????????????????????????  
????????????????????????????????????????????????????????????????  
????????????????????????????????????????????????????????????????  
????????????????????????????????????????????????????????????????  
????????????????????????????????????????????????????????????????  
????????????????????????????????????????????????????????????????  
????????????????????????????????????????????????????????????????  
????????????????????????????????????????????????????????????????  
????????????????????????????????????????????????????????????????  
????????????????????????????????????????????????????????????????  
????????????????????????????????????????????????????????????????  
????????????????????????????????????????????????????????????????  
????????????????????????????????????????????????????????????????  
????????????????????????????????????????????????????????????????

>P\_clavata\_MFLUCC\_12\_0268

?????CATTATAGAGTTTCTAAACTCCCAACCCATGTGAACTTACC-  
ATTGTTGCCTCGGCAGAAGCTGCTCGGT-  
GCACCTTACCCTGGAACGGCCTACCCTGTAGCGCCTTACCCTGGAACGGCTTACCCTGTAGCGG  
CTGCCGGTGGACTACCAAACCTTTGTTATTTTATTGTAATCTGAGCGTCTATTTTAATAAGTCAA  
AACTTTCAACAACGGATCTCTTGTTCTGGCATCGATGAAGAACGCAGCGAAATGCGATAAGTA  
ATGTGAATTGCAGAATTCAGTGAATCATCGAATCTTTGAACGCACATTGCGCCCATTAGTATTCT  
AGTGGGCATGCCTGTTGAGCGTCATTTCAACCCTTAAGCCTAGCTTAGTGTGGGAGCCTACT  
G--  
CTTTTGCTAGCTGTAGCTCCTGAAATACAACGGCGGATCTGCGATATCCTCTGAGCGTAGTAA-  
TTTTATCTCGCTTTTGACTGGAGTTGCAGCGTCTTAGCCGCTAAATCCCC-AA-  
TTTTAATGGTTGACCTCAGTTAGTCATTCTCACAAATCCC-ATCATT-----CCATC-----  
CTCATCATCATCACCT--CGCAA---CA-TTTCCAAC-TGGTGCCGAAAATCT-G-----  
TTTTCGCACCTGCC-CATTTCCAG--ACACTTACCC-----  
GCCGCACGACCCCGCGGTGCAAACGAAAAATTTCTTA--  
TCACAGCCCCACATCGCACAAACATTTTGGCAGTCATGCACTTTCCAAGACCCACAATGAACAA  
TTGCTGACCCCGCCAAATAGGAAGCCGCGGAGCTCGGAAAGGGTTCCTTCAAGTACGCATGGG  
TTCTTGACAAGCTCAAGGCCGAGCGTGAGCGTGGTATCACCATTGATATCGCTCTCTGGAAGTT  
CGAGACCAACGAGTACAATGTCACCGTCATTGGTTAGTATCCCTGTCCACACGATGTACCATGC  
ATCCGACCTT-  
GTACTAACATGGCAATCCAGATGCTCCCGGTCACCGTGATTTTCATCAATGCTGCTTTCTGGTACG  
TAGTC-CATCTACCTCGACAC-GCCTCAATACGACAACCCTCCGCAACTCGACAAC--  
GACCTTCTCAACAACCTGCTTGTTGGAACCAAGAAAAGACCTGATACTGACCGGTCTCTGATA  
GGCAAACCATCTCTGGCGAGCACGGTCTCGACAGCAATGGAGTGACGTACCCTTCTTGGCT  
ACTTGCTTTCCACGAACATCTCAGCTAATACCCG-  
TGATTGTTGAGCTACAACGGTACCTCTGAGCTCCAGCTCGAGCGCATGAGCGTCTACTTCAACG  
AGGCTTCCGGCAACAAGTACGTTCTCGTGCCGTCTCGTCGATCTCGAGCCCGGTACCATGGA  
TGCCGTCCGCGCCGGTCTTTGCGTCAGCTCTTCCGCCCTGACAACTTTGTCTTGGTACGTCGG  
GTGCC

>P\_colombiensis\_CBS\_118553

AGGGATCATTATAGAGTTTCTAAACTCCCAACCCATGTGAACTTACC-  
ATTGTTGCCTCGGCAGAAGCTGCTCGGT-



ATACCCTACCTTGGAACGGCCTACCCTGTAGCGCCTTACCCTGGAACGGCTTACCCTGCAACGG  
CTGCCGGTGGACTACTAACTCTTGTTATTTTATTGTAATCTGAGCGTCTTATTTAATAAGTCAA  
AACTTTCAACAACGGATCTCTTGTTCTGGCATCGATGAAGAACGCAGCGAAATGCGATAAGTA  
ATGTGAATTGCAGAATTCAGTGAATCATCGAATCTTTGAACGCACATTGCGCCATTAGTATTCT  
AGTGGGCATGCCTGTTGAGCGTCATTTCAACCCTAAGCCTAGCTTAGTGTGGGAGCCTACT  
G--  
CTTTTACTAGCTGTAGCTCCTGAAATACAACGGCGGATCTGCGATATCCTCTGAGCGTAGTAA-  
TTTTTATCTCGCTTTTACTGGAGTTGCAGCGTCTTAGCCGCTAAACCCCC-AA-  
TTTTTAATGGTTGACCTCAGGTTAGTCATGCTCACAGTCCC-ATCATCC-----TCATC-----  
--ATAATCATCGACT--CGCAA----CA-TTTTCCAACC-GGTGCCGAAATTCT-G-----  
TTTTCGCACCTGCC-CATTTTCCCAG--ACACTTACCC-----  
GCCGCACGACCCCGCGGTGCAAACGAAAAATTTCTTA--TCACAGCCCCACTTCACAC-  
AACATTTTGGCAGCCACGCCTTTGCATGACCCACAGTGAACAATTGCTAACCCCGCCAAATAG  
GAAGCCGCGGAGCTCGGAAAGGGTTCCTTCAAGTACGCATGGGTCTTGACAAGCTCAAGGCC  
GAGCGTGAGCGTGGTATCACCATGATATCGCTCTCTGGAAGTTCGAGACCAACGAGTACAATG  
TCACCGTCATTGGTTAGTATCCCTGTTACAGAATGTACCATGTCTCCGAATC-  
AGACTAACATCACAACACAGACGCTCCCGGTACCGTGATTTTCATCAATGCTGCCTTCTGGTAT  
GTAGCC-CATCTACTTCGGCAC-GCCTCAATACGACA-CCCTCCGCAACTCGACGAC--  
GACATTCTCGGC---

>P\_digitalis\_ICMP\_5434

?????CATTATAGAGTTTTCTAAACTCCCAACCCATGTGAACCTTACC-  
ATTGTTGCCTCGGCAGAAGCTGCTCGGT-  
GCACCCTACCTTGGAACGGCCTACCCTGTAGCGCCTTACCCTGGAACGGCTTACCCTGTAGCGG  
CTGCCGGTGGACTACCAAACCTCTTGTTATTTTATTGTAATCTGAGCGTCTTATTTAATAAGTCAA  
AACTTTCAACAACGGATCTCTTGTTCTGGCATCGATGAAGAACGCAGCGAAATGCGATAAGTA  
ATGTGAATTGCAGAATTCAGTGAATCATCGAATCTTTGAACGCACATTGCGCCATTAGTATTCT  
AGTGGGCATGCCTGTTGAGCGTCATTTCAACCCTAAGCCTAGCTTAGTGTGGGAGCCTACT  
G--  
CTTTTGCTAGCTGTAGCTCCTGAAATACAACGGCGGATCTGCGATATCCTCTGAGCGTAGTAA-  
TTTTTATCTCGCTTTTACTGGAGTTGCAGCGTCTTAGCCGCTAAATCCCCAAA-  
TTTTTAATGGTTGACCTC????????????????????????????????????????????  
????????????????????????????????????????????????????????????  
????????????????????????????????????????????????????????????  
????????????????????????????????????????????????????????????  
????????????????????????????????????????????????????????????  
????????????????????????????????????????????????????????????  
????????????????????????????????????????????????????????????  
TGCTGCTTCTGGTATGTAGCC-CATCTACCTCTACGC-GCCTCAATACGACA-

CCCCGGCAACTCGACGAC--GACGTTCTCAAC---  
TGCTCGGTTGGAACCAAATGAAAGACTTGATACTGACCGGTCTCTGATAGGCAAACCATCTCTG  
GCGAGCACGGTCTCGACAGCAATGGAGTGTACGTACCCTTTCCCTGGCTACTCGCTTTCCACG  
AACATGCCAGCTAACACTCG-  
TGGTTGTGAAGCTACAACGGTACCTCCGAGCTCCAGCTCGAGCGCATGAGCGTCTACTTCAACG  
AGGCTCCGGCAACAAGTACGTTCCCTCGTGCCGTCTCGTATCTCGAGCCCGGTACCATGGA  
TGCCGTCCGCGCCGGTCTTTCCGGTACGCTCTCCGCCCTGACAACTTCGTCTTCGGTCAGTCCG  
GTGCC

>P\_dilucida\_LC3232

????????????????????????????????????ACCCATGTGAACTTACC-  
ATTGTTGCCTCGGCAGAAGCTGCTCGGT-  
ATACCTTACCTTGAACGGCCTACCCTGTAGCGCCTTACCCTGGAACGGCTTACCCTGTGACGG  
CTGCCGGTGGACTACCAAACCTTTGTTATTTTATTGTAATCTGAGCGTCTATTTAATAAAGTCAA  
AACTTTCAACAACGGATCTCTTGGTTCTGGCATCGATGAAGAACGCAGCGAAATGCGATAAGTA  
ATGTGAATTGCAGAATTCAGTGAATCATCGAATCTTTGAACGCACATTGCGCCATTAGTATTCT  
AGTGGGCATGCCTGTTGAGCGTCATTTCAACCCTTAAGCCTAGCTTAGTGTGGGAGCCTACT  
G--

CTTTTGTTAGCTGTAGCTCCTGAAATACAACGGCGGATCTGCGATATCCTCTGAGCGTAGTAA-  
TTTTTATCTCGCTTTTGACTGGAGTTGCAGCGTCTTTAGCCGCTAAACCCCC-  
AATTTTTAAATGGTTGACCTCAGGTTAGTCATCCTCGCAATCCC-ATCATCC-----CCATC-----  
---CTCCTCATAATCGCCT--CGCAA----CA--TTTCTCCC-GGTGCCGAAAATCC-G-----  
-TTCGCGCACCTGCC-CATTTTTCAA--ACACTTACCCC-----  
GCCGCACGACCCCGCGGTGCAAACGAAAAATTTCTTA--  
TCACAGCCCCACATCGCACAAACATTTTGGCATCCATGCACGTTCCATGACCCACCATGAACAA  
TTGCTGACCCCGCCAAATAGGAAGCCGCGAGCTCGGAAAGGGTTCCTTCAAGTACGCATGGG  
TTCTTGACAAGCTCAAGGCCGAGCGTGAGCGTGGTATCACCATTGATATCGCTCTCTGGAAGTT  
CGAGACCAACGAGTACAATGTCACTGTCAATTGGTTAGTATCCCTGCTCACAACATGTATCATGTC  
TCCGAATTT-

AGACTAACATTACGATCCAGACGCTCCCGGTCACCGTGATTTTCATCAA???GCTTTCTGGTATGT  
AGCC-CATCTACCTCGACAC-GCCTCAATACGACG-CCTCCCACACTCGACAAC--  
GACGTTCTCACC---

TACTTGGTCGGAACCAAACAAAAGACATGATACTGACCGGTCTCTGATAGGCAAACCATTTCTG  
GCGAGCACGGTCTCGACAGCAATGGAGTGTACGTACCCTTTCCCTGGCTACTTGCTTTCCCATG  
AACGTGTTAGCTAACACTCG-  
TCCTTGCTCAGCTACAACGGTACCTCCGAGCTCCAGCTCGAGCGCATGAGCGTCTACTTCAACG  
AGGCTCCGGCAACAAGTACGTTCCCTCGTGCCGTCTCGTATCTCGAGCCCGGTACCATGGA  
TGCCGTCCGCGCCGGTCTTTCCGGTACGCTCTCCGCCCTGACAACTTCGTCTTCGGTCAGTCCG  
GTGCC

>P\_diploclisiae\_CBS\_115587

AGGGATCATTATAGAGTTTTCTAAACTCCCAACCCATGTGAACTTACC-  
ATTGTTGCCTCGGCAGAAGCTGCTCGGT-  
GCACCTTACCTTGAACGGCCTACCCTGTAGCGCCTTACCCTGGAACGGCTTACCCTGCAACGG  
CTGCCGGTGGACTACCAAACCTTTGTTATTTTATTGTTATCTGAGCGTCTATTTAATAAAGTCAA  
AACTTTCAACAACGGATCTCTTGGTTCTGGCATCGATGAAGAACGCAGCGAAATGCGATAAGTA

ATGTGAATTGCAGAATTCAGTGAATCATCGAATCTTTGAACGCACATTGCGCCATTAGTATTCT  
AGTGGGCATGCCTGTTTCGAGCGTCATTTCAACCCTTAAGCCTAGCTTAGTGTGGGAGCCTACT  
G--  
CTTTTGCTAGCTGTAGCTCCTGAAATACAACGGCGGATCTGCGATATCCTCTGAGCGTAGTAA-  
TTTTATCTCGCTTTTACTGGAGTTGCAGCGTCTTTAGCCGCTAAACCCCC-AA-  
TTTTAATGGTTGACCTCAGGTTAGTCATGCTCACAGTCCC-ATCATCC-----TCATC-----  
--ACCATCATCGCCT--CGCAA----CA-TTTTCCAACC-GTTGCCGAAATTCT-G-----  
TTTTCGCACCTGCC-CATTTTCCCAG--ACAATTACCC-----  
GCCGCACGACCCCGCGGTGCAAACGAAAAATTTCTTA--TCACAGCCCCACTTCACAC-  
AACATTTTGGCAGCCACGCACTTTGCATGACCCACAATGAACAATTGCTGACCCCGCCAAATAG  
GAAGCCGCGGAGCTCGGAAAGGGTTCCTTCAAGTACGCATGGGTTCTTGACAAGCTCAAGGCC  
GAGCGTGAGCGTGGTATCACCATTGATATCGCTCTCTGGAAGTTCGAGACCAACGAGTACAATG  
TCACCGTCATTGGTTAGTATCCCTGTCCACAGAAAGTATCATGTGTCCGAACTC-  
AGACTAACATCGCGATACAGACGCTCCCGGTACCGTGATTTTCATCAATGCTGCCTTCTGGTAT  
GTAGTC-CATCTACCTCGACAC-GCCTCAATACGACA-CCCTCCGCAACTCGACGAC--  
GGCATTCTCGGC---  
TACTTGGTTGGAACCAAACGAAAGACTTGATACTGACCGGTCTCTGATAGGCAAACCATCTCTG  
GCGAGCACGGTCTCGACAGCAATGGAGGTACGTACCGTTTCTTGGCTACTTGCTTTCCACG  
AACATGTTAGCTAACACTCG-  
TGCTTGCTCAGCTACAACGGCACCTCCGAGCTCCAGCTCGAGCGCATGAGCGTCTACTTCAACG  
AGGCTCCGGCAACAAGTACGTTCTCGTGCTGTCTCGTATCTCGAGCCCGGTACCATGGA  
CGCCGTCCGCGCCGGTCTTTTCGGCCAGCTCTTCCGCCCTGACAACTTCGTCTTCGGTCAGTCC  
GGTGCC  
>P\_diversiseta\_MFLUCC\_12\_0287  
?????CATTATAGAGTTTTTAAACTCCCAACCCATGTGAACTTACC-  
ATTGTTGCCTCGGCAGAGGCTACCCGGT-  
ACACCTTACCCTGGAACGGCCTACCCTGTAGCGCCTTACCCTGGAACGGCTTACCCTGTAGCGG  
CTGCCGGTGGACTACTAACTCTTGTTATTTATTGTAATCTGAGCGTCTATTTAATAAGTCAA  
AACTTTCAACAACGGATCTCTTGGTTCTGGCATCGATGAAGAACGCAGCGAAATGCGATAAGTA  
ATGTGAATTGCAGAATTCAGTGAATCATCGAATCTTTGAACGCACATTGCGCCATTAGTATTCT  
AGTGGGCATGCCTGTTTCGAGCGTCATTTCAACCCTTAAGCCTAGCTTAGTGTGGGAGTCTACTG  
--  
CTTTACTAGCTGTAGCTCCTGAAATACAACGGCGGATCTGCGATATCCTCTGAGCGTAGTAA-  
TTTTTTTCTCGCTTTTACTGGAGTTGCAGCGTCTTTAGCCGCTAAACCCCC--AA-  
TTTTAATGGTTGACCTCAGGTTAGTCATCCTCACAATCCC-ATCATCA-----  
TCTTCATCACCATCACCT--CGCACA----CA-TTTTCAACTC-AGTGCCGAAAATCA-----  
GTTTCGCACCTGCC-CACATTCCCAG--  
ACACTTACCCCGCCGCGTGGCCGCACGACCCCGCGGTGCAAACGAAAAATTTCTTA--T--  
CAGCCCCACATCACACAAACATTTTGGCGGCCATGCACTTTTCGTAACCCACAATGAGCAATTG  
CTGACCCTGCCAAATAGGAAGCCGCGGAGCTCGGAAAGGGTTCCTTCAAGTACGCATGGGTTT  
TTGACAAGCTCAAGGCCGAGCGTGAGCGTGGTATCACCATCGATATCGCTCTCTGGAAGTTGCA  
GACCAACGAGTACAATGTCACCGTCATTGGTCAGTATCCCTGCCACAAGCTCTCTCATGGATC  
CGAACTC-  
ATACTAACATCGCAATATAGATGCTCCCGGTACCGTGATTTTCATCAATGCTGCCTTCTGGTATG



TTTTAATGGTTGACCTC?????????????????????CCC-ATCATCC-----TCATC-----  
ATCATCATCGCCT--CGCAA---CA--TTCCAACC-GGTGCCGAAATTCT-----  
TTTTCGCACCTGCC-CATTTTCCAG--ACACTTACCC-----  
GCCGCACGACCCCGCGGTGCAAACGAAAAATTTCTTA--TCACAGCCCCACTTCACAC-  
AACATTTTGGCGGCCACGCACTTTCCATGACCCACAATGAACAATTGCTGACCCCGCCAAATAG  
GAAGCCGCGGAGCTCGGTAAGGGTTCCTTCAAGTACGCATGGGTCTTGACAAGCTCAAGGCC  
GAGCGTGAGCGTGGTATCACCATTGATATCGCTCTCTGGAAGTTCGAGACCAACGAGTACAATG  
TCACCGTCATTGGTTAGTATCCCTGTCCACAGAATGTATCATGTGTCCGAATC-  
AGACTAACATCGCAATACAGACGCTCCCGGTACCGTGATTCATCAATGCTGCCTTCTGGTAT  
GTAGCC-CATCTACCTCGACGC-GCCTCAATACGACA-CCCTCGGCAACTCGACGAC--  
GACATTCTCGGC---  
TACTTGGTTGGAACCAAACGAAAGACTTGATACTGACCGGTCTCTGATAGGCAAACCATCTCTG  
GCGAGCACGGTCTCGACAGCAATGGAGGTACGTACCGTTTCTTGGCTACTTGCTTTCCACG  
GACTTGTTAGCTAACACTCG-  
TGCTTGCTCAGCTACAACGGCACCTCCGAGCTCCAGCTCGAGCGCATGAGCGTCTACTTCAACG  
AGGCTTCCGGCAACAAGTACGTTCTCGTGCTGTCTCGTATCTCGAGCCCGGTACCATGGA  
CGCGTCCGCGCCGGTCTTTCCGCCAGCTTCCGCCCTGACAACCTTCTTCCGGTACGTTCC  
GG????

>P\_dracontomelon\_MFUCC\_10\_0149

?????CATTATAGAGTTTTCTAAACTCCCAACCCATGTGAACTTACC-  
ATTGTTGCCTCGGCAGAAGCTGCTCGGT-  
GCACCTTACCTTGAACGGCCTACCCTGTAGCGCCTTACCC-  
GGAACGGCTTACCCTGTAGCGGTGCCGGCGGACTACCAAACCTTGTATTATTGTAATCTG  
AGCGTCTTATTTAATAAGTCAAACTTTCAACAACGGATCTTGGTTCTGGCATCGATGAAGA  
ACGCAGCGAAATGCGATAAGTAATGTGAATTGCAGAATTCAGTGAATCATCGAATCTTTGAACG  
CACATTGCGCCATTAGTATTCTAGTGGGCATGCCTGTTTCGAGCGTCATTTCAACCCTTAAGCCT  
AGCTTAGTGTGGGAGCCTACTG--  
CTTTTGCTAGCTGTAGCTCCTGAAATACAACGGCGGATCTGCGATATCCTCTGAGCGTAGTAA-  
TTTTATCTCGCTTTTACTGGAGTTGCAGCGTCTTAGCCGCTAAACCCCC-  
TTTTAATGGTTGACCTC???TAGTCATGCTCACA-TCCC-ATCATCC-----  
TCATCATCATCACCT--CGCAA---CA-TTCCACGCC-GGTGCCGAAATCTGG-----  
TTTTCGCACCTGCC-CATTTTCCCG--ACACTTACCC-----  
GCCGCACGACCCCGCGGTGCAAACGAAAAATTTCTTA--  
TCATAGCCCCACATCACACAAACATTTTGGCAGCCACGCACTTTGCAAGACCCACAACGAACAA  
TTGCTGACCCCGCCAAATAGGAAGCCGCGGAGCTCGGAAAGGGTTCCTTCAAGTACGCATGGG  
TTCTTGACAAGCTCAAGGCCGAGCGTGAGCGTGGTATCACCATTGATATCGCTCTCTGGAAGTT  
CGAGACCAACGAGTACAATGTCACCGTCATTGGTTAGTATCCCCGTCCACAACATGCATCATGT  
CTCCGAACCTCAAGACTAACCTTGCCATACAGATGCTCCCGGTACCGTGATTCATCAA???????  
????????????????????????????????????????????????????????????????  
????????????????????????????????????????????????????????????????  
????????????????????????????????????????????????????????????????  
????????????????????????????????????????????????????????????????  
????????????????????????????????????????????????????????????????  
????????????????????????????????????????????????????????????????

>P\_endophytica\_MFLUCC\_18\_0932

?????CATTATAGAGTTTTCTAAACTCCCAACCCATGTGAACTTACC-  
ATTGTTGCCTCGGCAGAAGCTACCTGGT--  
TACCCTACCTTGGAACGGCCTACCCTGTAGCGCCTTACCCTGGAACGGCTTACCCTGTAACGGC  
TGCCGGTGGACTACCAAACCTTTGTTATTTTATTGTAATCTGAGCGTCTTATTTAATAAGTCAAA  
ACTTTCAACAACGGATCTCTTGGTTCTGGCATCGATGAAGAACGCAGCGAAATGCGATAAGTAA  
TGTGAATTGCAGAATTCAGTGAATCATCGAATCTTTGAACGCACATTGCGCCCATTAGTATTCTA  
GTGGGCATGCCTGTTGAGCGTCATTTCAACCCTAAGCCTAGCTTAGTGTGGGAGCCTACTG-  
-CTTTTGCTAGCTGTAGCTCCTGAAATACAACGGCGGATCTGCGATATCCTCTGAGCGTAGTAA-  
TTTTATCTCGCTTTTGACTGGAGTTGCAGCGTCTTAGCCGCTAAACCCCC-AA-  
TTTTAATGGT-GACCTCATCTCCCCATCCA-----TTCC---CATCC-----  
TTATCATTATCACCT--CGCAA----TA-TTGTCCGACT-GGTGCCGAAAATAT-G-----  
TTTTCGCACCTGCC-CATTTTCCCAG--ACACTTACCC-----  
GCCGCACGACCCCGCGGTGCAAACGAAAAATTTCTTA--  
TCACAGCCCCACATCGCACAAACATTTTGGCAGCCATGCACTTTACAAGACCCACAATGAACAA  
TTGCTGACCCCTCAAATAGGAAGCCGCCGAGCTCGGAAAGGGTTCCTTCAAGTACGCATGGG  
TCCTTGACAAGCTCAAGGCCGAGCGTGAGCGTGGTATCACCATTGATATCGCTCTCTGGAAGTT  
CGAGACCAACGAGTACAATGTCACCGTCATTGGTTAGTGTCCCTGTCCACACGATGTATCATGC  
ATCCGAACGT-  
ACACTAACATGGCAATACAGATGCTCCCGGTCACCGTGATTCATCAA????????????????  
????????????????????????????????????????????????????????????  
????????????????????????????????????????????????????????????  
????????????????????????????????????????????????????????????  
????????????????????????????????????????????????????????????  
????????????????????????????????????????????????????????????  
????????????????????????????????????????????????????????????  
????????????????????????????????????????????????????????????

>P\_ericacearum\_IFRDCC\_2439

?????CATTATAGAGTTTTCTAAACTCCCAACCCATGTGAACTTACC-  
ATTGTTGCCTCGGCAGAGGCTACCCGGT----  
ACCTACCCTGGAACGGCCTACCCTGTAGCGCCTTACCCGGGAACGGGCTACCCTGTAGCGGCT  
GCCGGTGGACTACCAAACCTTTGTTATTTTATGGTTATCTGAGCGTCTTATTTAATAAGTCAAAA  
CTTTCAACAACGGATCTCTTGGTTCTGGCATCGATGAAGAACGCAGCGAAATGCGATAAGTAAT  
GTGAATTGCAGAATTCAGTGAATCATCGAATCTTTGAACGCACATTGCGCCCATTAGTACTCTAG  
TGGGCATGCCTGTTGAGCGTCATTTCAACCCTAAGCCTAGCTTAGTGTGGGAGCCTACTG--  
CTTTTGCTAGCTGTAGCTCCTGAAATACAACGGCGGATCTGCGGTATCCTCTGAGCGTAGTAA-  
TTTTTTTCTCGCTTTTGACTGGAATTGCAGCGTCCTTAGCCGCTAAATCCCC-AA-  
TTTCTAATGGTTGACCTCAGGTTGGTTATCCTCAAATCCC-ATCATCA-----  
TGCCCATCATCGCCTCCCTCAA----TA-TTTTCAACTC-GGTGCCGAGAACCA-----  
TTATTCGCACCTGCC-CACATTCTCTGACACACTTACCC-----  
GCCGCACGACCCCGCGGTGCAAACGAAAAATTTCTTA--  
TCACAGCCCCACCTCGCACAAACATTTTGCAGCCATGCA-  
TCTCCATGATCCACAATGAGCAACTGCTGACCCCGCAAACAGGAAGCCGCCGAGCTCGGTAA  
GGGTTTCCTTCAAGTACGCCTGGGTTCTTGACAAGCTCAAGGCCGAGCGTGAGCGTGGTATCACC  
ATCGATATCGCTCTCTGGAAGTTCGAGACCAACGAGTACAATGTCACCGTCATTGGTTAGTCTAC  
CCGTCCACAAGAAGGATCATTATCCGACATC-  
ATACTAACATGGCAATACAGACGCTCCCGGTCACCGTGACTTCATCAATGCTGCTTTCTGGTATG

TAGCC-TATCTACCTCGACAC-GCCTCAACACGACG-CCTCCCGCAACTCGACAAC--  
GACGTTCTCAAC---  
TATCTGGTTGGAACCAACGAAAGACTTGATACTGACCCGTCTTTGATAGGCAAACCATCTCTG  
GCGAGCACGGTCTCGACAGCAATGGAGTGTACGTACCC-TTCCTTGGCTACCTACTTTTCGATG-  
-----GCTAATACTCG----  
TCGTTCAGCTACAACGGTACCTCCGAGCTCCAGCTCGAGCGCATGAGCGTCTACTTCAACGAGG  
CTTCCGGCAACAAGTACGTTCCCTCGTGCCGTCCCTCGTGCATCTCGAGCCCGGTACCATGGATGC  
CGTCCGCGCCGGTCTTTTCGGTCAGCTCTTCCGCCCTGACAACCTTCGTCTTCGGTCAGTCCGGTG  
CC

>P\_etonensis\_BRIP\_66615

AGGGATCATTATAGAGTTTTCTAAACTCCCAACCCATGTGAACTTACC-  
ATTGTTGCCTCGGCAGAAGCTGCTCGGT-  
GCACCTACCTTGAACGGCCTACCCTGTAGCGCCTTACCCTGGAACGGCTTACCCTGTAGCGG  
CTGCCGGCGGACTACCAAACCTTTGTTATTTTATTGTAATCTGAGCGTCTTATTTTAATAAGTCAA  
AACTTTCAACAACGGATCTCTTGGTTCTGGCATCGATGAAGAACGCAGCGAAATGCGATAAGTA  
ATGTGAATTGCAGAATTCAGTGAATCATCGAATCTTTGAACGCACATTGCGCCCATAGTATTCT  
AGTGGGCATGCCTGTTTCGAGCGTCATTTCAACCCTTAAGCCTAGCTTAGTGTGGGAGCCTACT  
G--  
CTTTTGCTAGCTGTAGCTCCTGAAATACAACGGCGGATCTGCGATATCCTCTGAGCGTAGTAA-  
TTTTATCTCGTTTTGACTGGAGTTGCAGCGTCTTAGCCGCTAAACCCCC-AA-  
TTTTAATGGTTGACCTCAGGTTAGTCATCCTCGCAATCCC-ATCATCC-----TCATC-----  
--ATCATCATCACCT--CACAAA----CA-TTCCACACC-GGTGCCGAAAATCTGG-----  
TTTTCGCACCTGCC-CATTTTCCCAT--ACACTTACCC-----  
GCCGCACGACCCCGCGGTGCAAACGAAAAATTTCTTA--TCATAGCCCCACATCAC--  
AAACATTTTGGCAGCCACGCACTCTGCATGACCCACAATGAACAATTGCTGACCCCGCCAAATA  
GGAAGCCGCCGAGCTCGGAAAGGGTTCCTTCAAGTACGCATGGGTTCTTGACAAGCTCAAGGC  
CGAGCGTGAGCGTGGTATCACCATTGATATCGCTCTCTGGAAGTTCGAGACCAACGAGTACAAT  
GTCACCGTCATTGGTTAGTATCCCTGCCACAACCTTGTGTCATGTCTCCGAACTCAAGACTAACC  
TTACAATACAGACGCTCCCGGTCACCGTGATTTCAATGCTGCCTTCTGGTATGTAGCC-  
CATCTACCTCGACGC-GTCTCAATACGACA-CCCCGGCAACTCGACAAC--GACGTTCTCAAC-  
--

TGCTTGGTTGAAACCAATGAAAGACTTGATACTGACCCGTCTATGATAGGCAAACCATTTCTG  
GCGAGCACGGTCTCGACAGCAATGGAGTGTACGTACCCTTTCCCTGGCTACTCGCCTTCTCGTG  
AACATGTCAGCTAACAGTCG-  
TGCTTGTTCAGCTACAACGGTACCTCCGAGCTCCAGCTCGAGCGCATGAGCGTCTACTTCAACG  
AGGCTTCCGGCAACAAGTACGTTCCCTCGTGCCGTCCCTCGTGCATCTCGAGCCCGGTACCATGGA  
TGCCGTCCGCGCCGGTCTTTTCGGTCAGCTCTTCCGCCCTGACAACCTTCGTCTTCGGTCAGTCCG  
GTGCC

>P\_formosana\_NTUCC\_17\_009

?????CATTATAGAGTTTTCTAAACTCCCAACCCATGTGAACTTACC-  
ATTGTTGCCTCGGCAGAAGCTGCTCGGT-  
GCACCTACCTTGAACGGCCTACCCTGTAGCGCCTTACCCTGGAACGGCTTACCCTGTAGCGG  
CTGCCGGTGGACTACCAAACCTTTGTTATTTTATTGTAATCTGAGCGTCTTATTTTAATAAGTCAA  
AACTTTCAACAACGGATCTCTTGGTTCTGGCATCGATGAAGAACGCAGCGAAATGCGATAAGTA

ATGTGAATTGCAGAATTCAGTGAATCATCGAATCTTTGAACGCACATTGCGCCATTAGTATTCT  
AGTGGGCATGCCTGTTTCGAGCGTCATTTCAACCCTTAAGCCTAGCTTAGTGTGGGAGCCTACT  
G--  
CTTTTACTAGCTGTAGCTCCTGAAATACAACGGCGGATCTGCGATATCCTCTGAGCGTAGTAA-  
TTTTTATCTCGCTTTTACTGGAGTTGCAGCGTCTTTAGCCGCTAAACCCCC-AA--  
TTTTAATGGT????????????????????????????????????ATCT-ATCATCC-----TCATC-----  
TTCATCATCATCACCT--CGCAA---GA-TTCCACACC-GGTGCCGAAAATCT-G-----  
TTTTCGCACCTGCC-CATTTTCCCAG--ACACTTACCC-----  
GCCGCACGACCCCGCGGTGCAAACGAAAAATTTCTTA--TCATAGCCCCACATCAC--  
AAACATTTTGGCAGCCACGCACTCTGCATGACCCACAATGAACAATTGCTGACCCCGCCAAATA  
GGAAGCCGCTGAGCTCGAAAGGGTTCCTTCAAGTACGCATGGGTTCTTGACAAGCTCAAGGC  
CGAGCGTGAGCGTGGTATCACCATTGATATCGCTCTCTGGAAGTTCGAGACCAACGAGTACAAT  
GTCACCGTCATTGGTTAGTATCCCTGCCACAACATGTGTCATGTCTCCGAACTCAAGACTAACC  
TTACAATACAGACGCTCCCGGTCACCGTGATTCATCAA????????????????????????????????  
????????CATACGACA-CCCCGGCAACTCGACAAC--GACGTTCTCAAC---  
TGCTTGGTTGAAACCAATGAAAGACTTGATACTGACCGGTCTCTGATAGGCAAACCATCTCTG  
GCGAGCACGGTCTCGACAGCAATGGAGGTACGTACCCTTCCCTGGCTACTCGCTTCTCGTG  
AACATGTCAGCTAACACTCG-  
TGCTTGTTCAGCTACAACGGTACCTCCGAGCTCCAGCTCGAGCGCATGAGCGTCTACTTCAACG  
AGGCTTCCGGCAACAAGTACGTTCTCGTGCCGCTCTCGTCGATCTCGAGCCCGGTACCATGGA  
TGCCGTCCGCGCCGGTCTTTCGGTCAGCTTCCGCCCTGACAACTTCGTCTTCGGTCAGTCCG  
GTGCC  
>P\_furcata\_MFLUCC\_12\_0054  
?????CATTATAGAGTTTTTAAACTCCCAACCCATGTGAACTTACC-  
ATTGTTGCCTCGGCAGAAGCTACCCGGT---  
ACCTTACCTTGAACGGCCTACCCTGTAGCGCCTTACCCTGGAACGGCCTACCCTGTAACGGCT  
GCCGGTGGACTACCAAACCTTTGTTATTTTTATGTTATCTGAGCGTCTTATTTAATAAGTCAAAA  
CTTTCAACAACGGATCTCTTGGTTCTGGCATCGATGAAGAACGCAGCGAAATGCGATAAGTAAT  
GTGAATTGCAGAATTCAGTGAATCATCGAATCTTTGAACGCACATTGCGCCATTAGTATTCTAG  
TGGGCATGCCTGTTTCGAGCGTCATTTCAACCCTTAAGCCTAGCTTAGTGTGGGAGCCTACTG--  
CTTTTGTAGCTGTAGCTCCTGAAATACAACGGCGGATCTGCGATATCCTCTGAGCGTAGTAATT  
TTTTTCTCGCTTTTACTGGAGTTGCAGCGTCTTTAGCCGCTAAACCCCC-AA-  
TTTTAATGGTTGACCTCAGGTTAGTTATCCTCACAATCCC-ATCATCC-----  
TCACCATCATTGCCT--CGCAA---CA-TTCCAAACC-GGCGTCGAAAATCTGG--  
TGTGTTTTTTCGCGCCTGCC-CACATTCCCAG--ACACTTACCC-----  
GCCGCACGACCCCGCGGTGCAAACGAAAAATTTCTTA--  
TCACAGCCCCACATCGCACAACATTCTGGCAGCCATGAACTTTACATAACCCAT-  
ACGAGCATCTGCTGACCCCGCCAAATAGGAAGCCGCGAGCTCGAAAGGGTTCCTTCAAGTA  
CGCATGGGTTCTTGACAAGCTCAAGGCCGAGCGTGAGCGTGGTATCACCATCGATATCGCTCTC  
TGGAAGTTCGAGACCAACGAGTACAATGTCACCGTCATTGGTTAGTATCCCTGTCCACAACATC  
CGACATGCATCCAAAATC-  
AGACTAACACGGCACACAGATGCTCCCGGTCACCGTGATTTTCATCAATGCTGCTTTCTGGTAT  
GTAGTT-CATCTACCTCGACGC-GCCTCAGCACGACG-CCTCTCGCAACTCGACAAC--  
GACGTTATCAAC---TACTTGGTT-



AAACCAAACGAAAGACTTGATACTGACAGGCCTCTGATAGGCAAACCATCTCTGGCGAGCACG  
GTCTCGACAGCAATGGAGTGTACGTACCCTTCCCTTGGCTACCTGCT-  
TCCCACGAACATGTCAGCTAACACTCG----  
TGGTTCAGCTACAACGGTACCTCCGAGCTCCAGCTCGAGCGCATGAGCGTCTACTTCAACGAGG  
CTTCCGGCAACAAGTACGTTCCCTCGTGCCGTCCTCGTGCATCTCGAGCCCGGTACCATGGATGC  
CGTCCGCGCCGGTCCCTTCGGTCAGCTCTTCCGCCCTGACAACTTCGTCTTCGGTCAGTCCGGTG  
CC

>P\_gaultheria\_IFRD\_411\_014

?????CATTATAGAGTTTT--AAACTCCCAACCCATGTGAACTTACC-  
ACTGTTGCCTCGGCAGAGGCTACCCGGT-  
ACACCCTACCCTGGAACGGCCTACCCTGTAGCGCCTTACCCTGGAACGGCTTACCCTGTAGCGG  
CTGCCGGTGGACTACCAAACCTTTGTTATTTTATTGTAATCTGAGCGTCTATTTTAATAAGTCAA  
AACTTTCAACAACGGATCTCTTGGTTCTGGCATCGATGAAGAACGCAGCGAAATGCGATAAGTA  
ATGTGAATTGCAGAATTCAGTGAATCATCGAATCTTTGAACGCACATTGCGCCATTAGTACTCT  
AGTGGGCATGCCTGTTGAGCGTCATTTCAACCCTAAGCCTAGCTTAGTGTGGGAGCCTGCA  
G--  
CCTTTACTGGCTGCAGCTCCTGAAATACAACGGCGGATCTGCGATATCCTCTGAGCGTAGTAAT  
TTTTTTTCTCGTTTTGACTGGAGTTGCACCGTCTTTACCCCTAAACCCCC-AA-  
TTTTTAATGGTTGACCTCATGTTAGTCATCCTCAAATCCC-ATCATCA-----  
--TCACCATCACCTGGCACGCA-----TTTCCAACGC-GTGCCGAAAATCA-G-----  
TTTTCGCACTTGCC-CATATTCCCAG--  
ACACTTACCCCGCCGCGTGGCCGCACGACCCCGCGATGCAAACGAAAAATTTCTTA--T--  
CAGCCCCACATCGCACAAACATTTTGGCAGCCATGCACTTTTCATAATCCACAATGAGCAATTG  
CTGACCCCGTCAAATAGGAAGCCGCGGAGCTCGGTAAGGGTTCCTTCAAGTACGCATGGGTTCT  
TGACAAGCTCAAGGCCGAGCGTGAGCGTGGTATCACCATCGATATCGCTCTCTGGAAGTTCGA  
GACCAACGAGTACAATGTCACCGTCATTGGTCAGTATCCCTGTCCACTAGCTGTTGCATGCATCC  
GAACTC-  
AGACTAATATGGCAATATAGATGCTCCCGGTACCCGTGATTTTCATCAATGCTGCTTTCTGGTATG  
TAGCC-TATCTACCTCGACAC-GCCTCAATATGATG-CCTCCCGCAACTCGACGCC--  
GACGTTCTCAA---TACTTGGTTGGATCCAAACGGAAGACTTGATACTGACCC-  
TCTCTGATAGGCAAACCATCTCTGGCGAGCACGGTCTCGACAGCAATGGAGTGTACGTGCCCTT  
TCCTTGGCTACCTGCTTTCCACGAACATGCTAGCTAACCCCTCG-  
TGGTTGTTGAGCTACAACGGTACCTCCGAGCTCCAGCTCGAGCGCATGAGCGTCTACTTCAACG  
AGGCTTCCGGCAACAAGTACGTTCCCTCGTGCCGTCCTCGTGCATCTCGAGCCCGGTACCATGGA  
TGCCGTTGCGCCGGTCCCTTCGGTCAGCTCTTCCGCCCTGACAACTTCGTCTTCGGCCAGTCCG  
GT-CC

>P\_gibbosa\_NOF\_3175

AGGGATCATTATAGAGTTTT--AAACTCCCAACCCATGTGAACTTACC-  
ACTGTTGCCTCGGCAGAGGCTACCCGGT-  
ACACCCTACCCTGGAACGGCCTACCCTGTAGCGCCTTACCCTGGAACGGCTTACCCTGTAGCGG  
CTGCCGGTGGACTACCAAACCTTTGTTATTTTATTGTAATCTGAGCGTCTATTTTAATAAGTCAA  
AACTTTCAACAACGGATCTCTTGGTTCTGGCATCGATGAAGAACGCAGCGAAATGCGATAAGTA  
ATGTGAATTGCAGAATTCAGTGAATCATCGAATCTTTGAACGCACATTGCGCCATTAGTACTCT  
AGTGGGCATGCCTGTTGAGCGTCATTTCAACCCTAAGCCTAGCTTAGTGTGGGAGCCTGCA

G--

CCTTTACTGGCTGCAGCTCCTGAAATACAACGGCGGATCTGCGATATCCTCTGAGCGTAGTAAT  
TTTTTTTCTCGCTTTTACTGGAGTTGCAGCGTCTTTAGCCGCTAAACCCCC-AA-  
TTTTTAATGGTTGACCTCAGGTTAGTCATCCTCAAATCCC-ATCATCA-----  
---TCACCATCACCTGGCAGCA-----TTTTCAACGC-GGTGCCGAAAATCA-G-----  
TTTTCGCACTTGCC-CATATCCCAG--  
ACACTTACCCCGCCGCGTGGCCGCACGACCCCGCGATGCAAACGAAAAATTTCTTA--T--  
CAGCCCCACATCGCACAAACATTTTGGCAGCCATGCACTTTTCATAATCCACAATGAGCAATTG  
CTGACCCCGTCAAATAGGAAGCCGCGAGCTCGGTAAGGGTTCCTTCAAGTACGCATGGGTTCT  
TGACAAGCTCAAGGCCGAGCGTGAGCGTGGTATCACCATCGATATCGCTCTCTGGAAGTTCA  
GACCAACGAGTACAATGTCACCGTCATTGGTCAGTATCCCTGTCCACTAGCTGTTGCATGCATCC  
GAACTC-

AGACTAATATGGCAATATAGATGCTCCCGGTCACCGTGATTTTCATCAA????????TGGTATGTA  
GCC-TATCTACCTCGACAC-GCCTCAATATGATG-CCTCCCGCAACTCGACGCC--  
GACGTTCTCAA---TACTTGGTTGGATCCAAACGGAAGACTTGATACTGACCC-  
TCTCTGATAGGCAAACCATCTCTGGCGAGCACGGTCTCGACAGCAATGGAGTGTACGTGCCCTT  
TCCTTGGCTACCTGCTTTCCACGAACATGCTAGCTAACCCTCG-  
TGGTTGTTTACGCTACAACGGTACCTCCGAGCTCCAGCTCGAGCGCATGAGCGTCTACTTCAACG  
AGGCTTCCGGCAACAAGTACGTTCTCGTGCCGTCTCGTCGATCTCGAGCCCGGTACCATGGA  
TGCCGTTCCGCGCCGGTCTTTCGGTCAGCTCTTCCGCCCTGACAACTTCGTCTTCGGCCAGTCCG  
GTGCC

>P\_grevilleae\_CBS\_114127

AGGGATCATTATAGAGTTTTCTAAACTCCCAACCCATGTGAACTTACC-  
ATTGTTGCCTCGGCAGAAGCTGCTCGGT-  
GCACCCTACCTTGGAACGGCCTACCCTGTAGCGCCTTACCCTGGAACGGCTTACCCTGTAGCGG  
CTGCCGGTGGACTACCAAACCTTTGTTATTTTATTGTAATCTGAGCGTCTTATTTAATAAGTCAA  
AACTTTCAACAACGGATCTCTTGGTTCTGGCATCGATGAAGAACGCAGCGAAATGCCATAAGTA  
ATGTGAATTGCAGAATTCAGTGAATCATCGAATCTTTGAACGCACATTGCGCCATTAGTATTCT  
AGTGGGCATGCCTGTTGAGCGTCATTTCAACCCTAAGCCTAGCTTAGTGTGGGAGCCTACT  
G--

CTTTTGCTAGCTGTAGCTCCTGAAATACAACGGCGGATCTGCGATATCCTCTGAGCGTAGTAAAT  
TTTTATCTCGCTTTTACTGGAGTTGCAGCGTCTTTAGCCGCTAAATCCCC-AA-  
TTTTTAATGGTTGACCTCAGGTTAGTCATACTCGCAATCCC-ATCATCC-----CCATG-----  
CTCATCATCATCACCT--CGCAA---CA-TTCCACACC-GGTGCCGAAAATCTGG-----  
TTTTCGCACCTGCC-CATTTTCCCAG--ACACTTACCC-----  
GCCGCACGACCCCGCGGTGCAAACGAAAAATTTCTTA--  
TCACAGCCCCACATCACACAAACATTTTGGCAGCCACGCACTTTGTATGACCCACAATGAACAA  
TTGCTGACCCCGCAAATAGGAAGCCGCGAGCTCGGAAAGGGTTCCTTCAAGTACGCATGGG  
TTCTTGACAAGCTCAAGGCCGAGCGTGAGCGTGGTATCACCATTGATATCGCTCTCTGGAAGTT  
CGAGACCAACGAGTACAATGTCACCGTCATTGGTTAGTATCCCTGCCACAACATGCATCATGT  
CTCCGAACTCAAGACTAATCTTGCAATACAGACGCTCCCGGTACCGTGATTTTCATCAATGCTG  
CCTTCTGGTATGTAGCC-CATCTACCTCGACGC-  
GCCTCGATACGACACCCCGGCAACTCGACAAC--GACATTCTCAAC---  
TGCTTGTGGTGAATCATACGAAAGACTTGATACTGACCGGTCTATGATAGGCAAACCATCTCTGG

CGAGCACGGTCTCGACAGCAATGGAGTGTACGTACCCTTTCCTTGGCTACTTGCTTTCTCGTGAA  
CATGTCAGCTAACACTCG-  
TGCTTGTTTACGCTACAACGGTACCTCCGAGCTCCAGCTCGAGCGCATGAGCGTCTACTTCAACG  
AGGCTTCCGGCAACAAGTACGTTCTCGTGCCGTCTCGTCGATCTCGAGCCCGGTACCATGGA  
TGCCGTCCGCGCCGGTCTTTCGGTCAGCTTCCGCCCTGACAACTTCGTATTCGGTCAGTCCG  
GTGCC

>P\_hawaiiensis\_CBS\_114491

AGGGATCATTATAGAGTTTTCTAAACTCCCAACCCATGTGAACTTACCAATTGTTGCCTCGGCAG  
AGGCTACCCGGT---  
ACCTTACCTTGGTACGGCCTACCCTGTAGCGCCTTACCCTGGAACGGGCTACCCTGTAGCGGCT  
GCCGGTGGACTACCAAACCTTTGTTATTTTATGGTTATCTGAGCGTCTTATTTTAATAAGTCAAAA  
CTTTCAACAACGGATCTCTTGGTTCTGGCATCGATGAAGAACGCAGCGAAATGCGATAAGTAAT  
GTGAATTGCAGAATTCAGTGAATCATCGAATCTTTGAACGCACATTGCGCCCATAGTACTCTAG  
TGGGCATGCCTGTTGAGCGTCATTTCAACCCTAAGCCTAGCTTAGTGTGGGAGCCTACTG--  
CTTTTACTAGCTGTAGCTCCTGAAATACAACGGCGGATCTGCGATATCCTCTGAGCGTAGTAA-  
TTTTTTTCTCGTTTTGACTGGAGTTGCAGCGTCTTTGCCGCTAAACCCCC-AA-  
TTTTTAATGGTTGACCTCAGTTAGTCATCCTCACAAATCCC-ATCATCA-----  
-CATCCGCGGCTTCC-ACTCGAA----CA-TTTCCACCC-GACGCCGAAAATAT-----  
TTTCGCTTGCGCATCTTCC-CACATTCTC----  
CCACTTACCCCGCCGCGTGGCCGCACGACCCCGCGGTGCAAACGAAAAATTTCTTA--T--  
CGGCCCCACCTCGCATAAACATTTTGGCAGCCACTCACTTC-  
CATGACCCACGATGAGCCATTGCTGACCCCGCCAAATAGGAAGCCGCGGAGCTCGGAAAGGGT  
TCCTTCAAGTACGCCTGGGTTCTTGACAAGCTCAAGGCCGAGCGTGAGCGTGGTATCACCATCG  
ATATCGCTCTCTGGAAGTTGAGACCAACGAGTACAATGTCACCGTCATTGGTTAGTATCCCTGT  
CCACAACAAGTCTCATGCATCCGAACTC-  
AGACTAACATGGCAATACAGACGCTCCCGGTCACCGTGACTTCATCAATGCTGCCTTCTGGTAT  
GTACCCCATCGACCTCGACAC-GCCCGACACGACG-  
CCTCCCGCAGCTCGACAACGCGGCGTTCTCAAC---  
TACTTGGTTGAGACCAAACGAAAGACTTGATACTGACCAGTCTTTGATAGGCAAACCATTTCTG  
GCGAGCACGGTCTCGACAGCAATGGAGTGTACGTACCCTTTCCTTGGCTCCTTGCTTTCCCATGA  
GCATGTTGACTAACACTCG-  
TGGTCGTTACGCTACAACGGTACCTCTGAGCTCCAGCTCGAGCGCATGAGCGTCTACTTCAACG  
AGGCTTCCGGCAACAAGTACGTTCTCGTGCCGTCTCGTCGATCTCGAGCCCGGTACCATGGA  
TGCCGTCCGCGCCGGTCTTTCGGTCAGCTTCCGCCCTGACAACTTCGTCTTCG????????????  
??

>P\_hollandica\_CBS\_265\_33

AGGGATCATTATAGAGTTTTCTAAACTCCCAACCCATGTGAACTTACC-  
ATTGTTGCCTCGGCAGAAGCTACCTGGT--  
TACCCTACCTTGAACGGCCTACCCTGTAGCGCCTTACCCTGGAACGGCCTACCCTGTAACGGC  
TGCCGGTGGACTACCAAACCTTTGTTATTTTATTGTAATCTGAGCGTCTTATTTTAATAAGTCAAA  
ACTTTCAACAACGGATCTCTTGGTTCTGGCATCGATGAAGAACGCAGCGAAATGCGATAAGTAA  
TGTGAATTGCAGAATTCAGTGAATCATCGAATCTTTGAACGCACATTGCGCCCATAGTATTCTA  
GTGGGCATGCCTGTTGAGCGTCATTTCAACCCTAAGCCTAGCTTAGTGTGGGAGCCTACCG-  
-CTTTTGCTAGCGGTAGCTCCTGAAATACAACGGCGGATCTGCGATATCCTCTGAGCGTAGTAA-

TTTTATCTCGCTTTTACTGGAGTTGCAGCGTCTTTAGCCGCTAAACCCCCCAAATTTTTTAATG  
GTTGACCTCAGGTTAGTCATCCACACAATCCC-ATCATT-  
CCACCATTCCCATTATCATCATCGCT----CAAA----CA-TCTTCCAACC-  
GGTGCCGAAAATCT-G-----TTTTCGCACCTGCC-CATTTTCCCAG--ACACTTACCCC-----  
---GCCGCACGACCCCGCGGTGCAAACGAAAAATTTCTTA--  
TCACAGCCCCACATCGCACAAACATTTTGGCAGCCATGCACTTTCCAAGACCCACAATGAACAA  
TTGCTGACCCCGCCAAATAGGAAGCCGCCGAGCTCGGAAAGGGTTCCTTCAAGTACGCATGGG  
TTCTTGACAAGCTCAAGGCCGAGCGTGAGCGTGGTATCACCATTGATATCGCTCTCTGGAAGTT  
CGAGACCAACGAGTACAATGTCACCGTCATTGGTTAGTATCCCTGCCACACCATGTATCATGC  
ATCCGACCTT-  
GTGCTAACATGGCAACACAGATGCTCCC????????????????????TGCTGCCTTTTGGTATGTAGCC  
-CATCTACCTCGACAC-GCCTCAATACGACAACCCCGCAACTCGACAAC--  
GACGTTCTCAACAACACTGCTTGGTTGGAAACAAAGGAAAGACTTGATACTGACCGGTCTTGATA  
GGCAAACCATCTCTGGCGAGCACGGTCTCGACAGCAATGGAGTGTACGTACCCTTCTTGCT  
ACTTGCTTTCCACGAACATCTCAGCTAACACTCG-  
TGGTTGTTTCAAGCTACAACGGTACCTCCGAGCTCCAGCTCGAGCGCATGAGCGTCTACTTCAACG  
AGGCTCCGGCAACAAGTACGTTCTCGTGCCGTCTCGTATCTCGAGCCCGGTACCATGGA  
TGCCGTCCGCGCCGGTCTTTCCGGTCAGCTCTCCGCCCTGACAACTTCGTCTTCGGTCAGTCCG  
GTGCC

>P\_hollandica\_MEAN\_1091

????ATCATTATAGAGTTTTCTAAACTCCCAACCCATGTGAACTTACC-  
ATTGTTGCCTCGGCAGAAGCTACCTGGT--  
TACCCTACCTTGGAACGGCCTACCCTGTAGCGCCTTACCCTGGAACGGCCTACCCTGTAACGGC  
TGCCGGTGGACTACCAAACCTTGTATTTTTATTGTAATCTGAGCGTCTTATTTAATAAGTCAAA  
ACTTTCAACAACGGATCTCTTGGTTCTGGCATCGATGAAGAACGCAGCGAAATGCGATAAGTAA  
TGTGAATTGCAGAATTCAGTGAATCATCGAATCTTTGAACGCACATTGCGCCATTAGTATTCTA  
GTGGGCATGCCTGTTTCGAGCGTCATTTCAACCCTAAGCCTAGCTTAGTGTGGGAGCCTACCG-  
-CTTTGCTAGCGGTAGCTCCTGAAATACAACGGCGGATCTGCGATATCCTCTGAGCGTAGTAA-  
TTTTATCTCGCTTTTACTGGAGTTGCAGCGTCTTTAGCCGCTAAACCCCCCAAATTTTTTAATG  
GTTGACCTC????????????CCACACAATCCC-ATCATT-  
CCACCATTCCCATTATCATCATCGCT----CAAA----CA-TCTTCCAACC-  
GGTGCCGAAAATCT-G-----TTTTCGCACCTGCC-CATTTTCCCAG--ACACTTACCCC-----  
---GCCGCACGACCCCGCGGTGCAAACGAAAAATTTCTTA--  
TCACAGCCCCACATCGCACAAACATTTTGGCAGCCATGCACTTTCCAAGACCCACAATGAACAA  
TTGCTGACCCCGCCAAATAGGAAGCCGCCGAGCTCGGAAAGGGTTCCTTCAAGTACGCATGGG  
TTCTTGACAAGCTCAAGGCCGAGCGTGAGCGTGGTATCACCATTGATATCGCTCTCTGGAAGTT  
CGAGACCAACGAGTACAATGTCACCGTCATTGGTTAGTATCCCTGCCACACCATGTATCATGC  
ATCCGACCTT-  
GTGCTAACATGGCAACACAGATGCTCCCGTACCGTGACTTCATCAATGCTGCCTTTTGGTATG  
TAGCC-CATCTACCTCGACAC-GCCTCAATACGACAACCCCGCAACTCGACAAC--  
GACGTTCTCAACAACACTGCTTGGTTGGAAACAAAGGAAAGACTTGATACTGACCGGTCTTGATA  
GGCAAACCATCTCTGGCGAGCACGGTCTCGACAGCAATGGAGTGTACGTACCCTTCTTGCT  
ACTTGCTTTCCACGAACATCTCAGCTAACACTCG-  
TGGTTGTTTCAAGCTACAACGGTACCTCCGAGCTCCAGCTCGAGCGCATGAGCGTCTACTTCAACG

AGGCTCCGGCAACAAGTACGTTCTCGTGCCGTCCTCGTCGATCTCGAGCCCGGTACCATGGA  
TGCCGTCCGCGCCGGTCCTTTGCGTCAGCTCTCCG????????????????????????????

>P\_humus\_CBS\_336\_97

AGGGATCATTATAGAGTTTTCTAAACTCCCAACCCATGTGAACTTACC-  
ATTGTTGCCTCGGCAGAAGCTGCTCGGC-  
GCGCCTTACCTTGGAACGGCCTACCCTGTAGCGCCTTACCCTGGAACGGCTTACCCTGCAACGG  
CTGCCGGTGGACTACCAAACCTTTGTTATTTTATGGTTATCTGAGCGTCTTATTTAATAAGTCAA  
AACTTTCAACAACGGATCTCTTGTTCTGGCATCGATGAAGAACGCAGCGAAATGCGATAAGTA  
ATGTGAATTGCAGAATTCAGTGAATCATCGAATCTTTGAACGCACATTGCGCCCATTAGTATTCT  
AGTGGGCATGCCTGTTGAGCGTCATTTCAACCCTTAAGCCTAGCTTAGTGTGGGAGCCTACT  
G--

CTTTTGCTAGCTGTAGCTCCTGAAATACAACGGCGGATCTGCGATATCCTCTGAGCGTAGTAA-  
TTTTATCTCGCTTTTACTGGAGTTGCAGCGTCTTAGCCGCTAAACCCCC-AA-  
TTTTAATGTTGACCTCAGTTAGTCATGCTCACAGTCCC-ATCATCC-----TCATC-----  
--ACCATCATCGCCT--CGCAA---CA-TTTCCAACC-GGTGCCGAAATTCT-G-----  
TTTTGACCTGCC-CATTTCCAG--ACAATTACCC-----  
GCCGCACGACCCCGCGGTGCAAACGAAAAATTTCTTA--TCACAGCCCCACTTCACAC-  
AACATTTTGGCGCCACGCCTTTGCATGACCCACAATGAACAATTGCTGACCCCGCCAAATAG  
GAAGCCGCGGAGCTCGGAAAGGGTTCCTTCAAGTACGCATGGGTTCTTGACAAGCTCAAGGCC  
GAGCGTGAGCGTGGTATCACCATTGATATCGCTCTCTGGAAGTTCGAGACCAACGAGTACAATG  
TCACCGTCATTGGTTAGTATCCCTGTCCACAGAAAGTATCATGTGTCCGAACTC-  
AGACTAACATCGCAATACAGACGCTCCCGGTACCGTGATTTTCATCAATGCTGCCTTCTGGTAT  
GTAGTC-CATCTACCTCGACAC-GCCTCAATACGACA-CCCTCCGCAACTCGACGAC--  
GGCATTCTCGGC---

TACTTGGTTGGAGCCAAACGAAAGACTTGATACTGACCGGTCTCTGATAGGCAAACCATCTCTG  
GCGAGCACGGTCTCGACAGCAATGGAGTGTACGTACCGTTTCCTTGGCTACTTGCTTTCCACG  
AACATGTTAGCTAACACTCG-  
TGCTTGCTCAGCTACAACGGCACCTCCGAGCTCCAGCTCGAGCGCATGAGCGTCTACTTCAACG  
AGGCTCCGGCAACAAGTACGTTCTCGTGCTGTCTCGTCGATCTCGAGCCCGGTACCATGGA  
CGCCGTCCGCGCCGGTCCTTTGCGCCAGCTCTCCGCCCTGACAACCTCGTCTTCGGTCAGTCC  
GGTGCC

>P\_hunanensis\_CSUFTCC15

?????????????????????????????????????????TGTGAACTTACC-  
ATTGTTGCCTCGGCAGAAGCTGCTCGGT-  
GCACCTTACCCTGGAACGGCCTACCCTGTAGCGCCTTACCCTGGAACGGCCTACCCTGTAGCGG  
CTGCCGGTGGACTACCAAACCTTTGTTATTGTATTGTAATCTGAGCGTCTTATTTAATAAGTCAA  
AACTTTCAACAACGGATCTCTTGTTCTGGCATCGATGAAGAACGCAGCGAAATGCGATAAGTA  
ATGTGAATTGCAGAATTCAGTGAATCATCGAATCTTTGAACGCACATTGCGCCCATTAGTATTCT  
AGTGGGCATGCCTGTTGAGCGTCATTTCAACCCTTAAGCCTAGCTTAGTGTGGGAGCCTACT  
G--

CTTTTACTAGCTGTAGCTCCTGAAATACAACGGCGGATCTGCGATATCCTCTGAGCGTAGTAAAT  
TTTTATCTCGCTTTTACTGGAGTTGCAGCGTCTTAGCCGCTAAATCCCC-AA-  
TTTTAATGTTGACCTCAGTTAGTCATCCTCGCAATCCC-ATCATCC-----TCATT-----  
CTCATCATCACCT--CGCAA---CA-TTCCACACC-GGTGCCGAAATCTGG-----

TTTTCGCACCTGCC-CATTTTCCCAG--ACACTTACCCC-----  
GCCGCACGACCCCGCGGTGCAAACGAAAAATTTCTTA--  
TCACAGCCCCACATCACACAAACATTTTGGCAGCCACGCACTTTGCATGACCCACAATGAACAA  
TTGCTGACCCCGCCAAATAGGAAGCCGCCGAGCTCGGAAAGGGTTCCTTCAAGTACGCATGGG  
TTCTTGACAAGCTCAAGGCCGAGCGTGAGCGTGGTATCACCATTGATATCGCTCTCTGGAAGTT  
CGAGACCAACGAGTACAATGTCACCGTCATTGGTTAGTATCCCTGCCCAACATGTATCATGT  
CTTCGAACTCAAGACTAACCTTGCAATACAGACGCTCCCGGTCACCGTGATTTTCATCAATGCTG  
CCTTCTGGTATGTAGCC-CATCTACCTCGACGC-GCCTCAATACGACA-  
CCACCGGCAACTCGACAAC--GACATTCTCAAC---  
TGCTTGGTTGAAACCAAAGAAAGACCTGATACTGACCGGTCTTTGATAGGCAAACCATCTCTG  
GCGAGCACGGTCTCGACAGCAATGGAGTGTACGTACCCTTCCCTGGCTACTCGTTTTTCCACG  
AACATGTCAGCTAACAGTCG-  
TGCTTGTTCAGCTACAACGGTACCTCCGAGCTCCAGCTCGAGCGCATGAGCGTCTACTTCAACG  
AGGCTTCCGGTAACAAGTACGTTCTCGTGCCGTCTCGTATCTCGAGCCCGGTACCATGGA  
TGCCGTCCGCGCCGGCCCTTTCGGTCAGCTCTCCGCCCTGACAACTTCGTCTTCGGCCAGTCC  
GGTGCC  
>P\_hunanensis\_CSUFTCC18  
?????????????????????????????????????????TGTGAACTTACC-  
ATTGTTGCCTCGGCAGAAGCTGCTCGGT-  
GCACCTACCCTGGAACGGCCTACCCTGTAGCGCCTACCCTGGAACGGCCTACCCTGTAGCGG  
CTGCCGGTGGACTACAAACTCTTGTTATTGTATTGTAATCTGAGCGTCTTATTTAATAAGTCAA  
AACTTTCAACAACGGATCTCTTGGTTCTGGCATCGATGAAGAACGCAGCGAAATGCGATAAGTA  
ATGTGAATTGCAGAATTCAGTGAATCATCGAATCTTTGAACGCACATTGCGCCATTAGTATTCT  
AGTGGGCATGCCTGTTTCGAGCGTCATTTCAACCCTAAGCCTAGCTTAGTGTGGGAGCCTACT  
G--  
CTTTTACTAGCTGTAGCTCCTGAAATACAACGGCGGATCTGCGATATCCTCTGAGCGTAGTAAAT  
TTTTATCTCGCTTTTACTGGAGTTGCAGCGTCTTTAGCCGCTAAATCCCC-AA-  
TTTTAATGGTTGACCTCAGGTTAGTCATCCTCGCAATCCC-ATCATCC-----TCATT-----  
CTCATCATCATCACCT--CGCAA---CA-TTCCACACC-GGTGCCGAAAATCTGG-----  
TTTTCGCACCTGCC-CATTTTCCCAG--ACACTTACCCC-----  
GCCGCACGACCCCGCGGTGCAAACGAAAAATTTCTTA--  
TCACAGCCCCACATCACACAAACATTTTGGCAGCCACGCACTTTGCATGACCCACAATGAACAA  
TTGCTGACCCCGCCAAATAGGAAGCCGCCGAGCTCGGAAAGGGTTCCTTCAAGTACGCATGGG  
TTCTTGACAAGCTCAAGGCCGAGCGTGAGCGTGGTATCACCATTGATATCGCTCTCTGGAAGTT  
CGAGACCAACGAGTACAATGTCACCGTCATTGGTTAGTATCCCTGCCCAACATGTATCATGT  
CTTCGAACTCAAGACTAACCTTGCAATACAGACGCTCCCGGTCACCGTGATTTTCATCAATGCTG  
CCTTCTGGTATGTAGCC-CATCTACCTCGACGC-GCCTCAATACGACA-  
CCACCGGCAACTCGACAAC--GACATTCTCAAC---  
TGCTTGGTTGAAACCAAAGAAAGACCTGATACTGACCGGTCTTTGATAGGCAAACCATCTCTG  
GCGAGCACGGTCTCGACAGCAATGGAGTGTACGTACCCTTCCCTGGCTACTCGTTTTTCCACG  
AACATGTCAGCTAACAGTCG-  
TGCTTGTTCAGCTACAACGGTACCTCCGAGCTCCAGCTCGAGCGCATGAGCGTCTACTTCAACG  
AGGCTTCCGGTAACAAGTACGTTCTCGTGCCGTCTCGTATCTCGAGCCCGGTACCATGGA  
TGCCGTCCGCGCCGGCCCTTTCGGTCAGCTCTCCGCCCTGACAACTTCGTCTTCGGCCAGTCC

GGTGCC

>P\_hydei\_MFLUCC\_20\_0135

?????CATTATAGAGTTTTCTAAACTCCCAACCCATGTGAACTTACC-  
ATTGTTGCCTCGGCAGAAGCTGCTCGGT-  
GCACCCTACCTTGGAACGGCCTACCCTGTAGCGCCTTACCCTGGAACGGCTTACCCTGTAACGG  
CTGCCGGTGGACTACCAAACCTTTGTTATTTTATTGTAATCTGAGCGTCTTATTTAATAAGTCAA  
AACTTTCAACAACGGATCTCTTGGTTCTGGCATCAATGAAGAACGCAGCGAAATGCGATAAGTA  
ATGTGAATTGCAAAATTCAGTGAATCATCGAATCTTTGAACGCACATTGCGCCATTAGTATTCT  
AGTGGGCATGCCTGTTGGAACGTCATTTCAACCCTTAAGCCTAGCTTAGTGTGGGAGCCTACTG  
--  
CTTTTGCTAGCTGTAGCTCCTGAAATACAACGGCGGATCTGCGATATCCTCTGAGCGTAGTAAAT  
TTTTATCTCGCTTTTACTGGAGTTGCAGCGTCTTTGGCCGCTAAATCCCC-AA-  
TTTT????????????????GTCTTGCGCA---TTCC-TTCATCC-----TCTCC-----  
TCATCATCATCACTT--CGCAA---CATTCCACACC-GGTGTGAAAATCTGG-----  
TTTTCGCACCTGCC-CATTTTCTCAG--ACACTTACCCC-----  
GCCGCACGACCCCGCGGTGCAAACGAAAAATTTCTTA--  
TCACAGCCCCACATCACACAAACATTTTGGCAGCCACGCACCTTGCATGACCCACAATGAACAA  
TTGCTGACCCCGCAAATAGGAAGCCGCGGAGCTCGGAAAGGGTTCCTTCAAGTACGCATGGG  
TTCTTGACAAGCTCAAGGCCGAGCGTGAGCGTGGTATCACCATTGATATCGCTCTCTGGAAGTT  
CGAGACCAACGAGTACAATGTCACCGTCATTGGTTAGTATCCCTGCCACAATATGTGTATGT  
CTCTGAACTCAAGACTAACCTTGCAATACAGACGCTCCCGGTACCGTGATTTTCAAA??????  
?????????????C-CATCTACCTCGACGC-GCCTCAATACGACA-CCCCGGCAACTCGACAAC--  
GACATTCTCAAC---  
TGCTTGTGGAAACCATACGAAAGACTTCATACTGACCGGTCTATGATAGGCAAACCATCTCTGG  
CGAGCACGGTCTCGACAGCAATGGAGTGTACGTACCCTTGATCTCGCTACTCGCTTTCTCGTGA  
ACATGTCAGCTAACAGTCG-  
TGCTTGTTCAGCTACAACGGTACCTCCGAGCTCCAGCTCGAGCGCATGAGCGTCTACTTCAACG  
AGGCTCCGGCAACAAGTACGTTCTCGTGCCGTCTCGTATCTCGAGCCCGGTACCATGGA  
TGCCGTCCGCGCCGGTCTTTTCGGTCAGCTCTCCGCCCTGACAACTTCGTCTTCGGTCAGTCCG  
GTGCC

>P\_iberica\_CAA1006

?????????????GTTTTCTAAACTCCCAACCCATGTGAACTTACC-  
ATTGTTGCCTCGGCAGAAGCTGCTCGGT-  
GCACCCTACCTTGGAACGGCCTACCCTGTAGCGCC-----  
TTACCCTGTAGCGGCTGCCGGTGGACTACCAAACCTTTGTTATTTTATTGTAATCTGAGCGTCTTA  
TTTTAATAAGTCAAACTTTCAACAACGGATCTCTTGGTTCTGGCATCGATGAAGAACGCAGCGA  
AATGCGATAAGTAATGTGAATTGAGAATTCAGTGAATCATCGAATCTTTGAACGCACATTGCC  
CCCATTAGTATTCTAGTGGGCATGCCTGTTGAGCGTCATTTCAACCCTTAAGCCTAGCTTAGTG  
TTGGGAGCCTACTG--  
CTTTTGCTAGCGGTAGCTCCTGAAATACAACGGCGGATCTGCGATATCCTCTGAGCGTAGTAA-  
TTTTTATCTCGCTTTTACTGGAGTTGCAGCGTCTTTAGCCGCTAAACCCCC-AA-  
TTTTAATGGTTGACCTCAGGTTAGTCATCCTCACAATCCC-ATCATCC-----  
CCATCATCATCGTCT--CGCAA---CA-TTTCCAACCT-GGTGCCGAAAATCT-G-----  
TTTTCGCACCTGCC-CATTTTCCAG--ACACTTACCCC-----

GCCGCACGACCCCGCGGTGCAAACGAAAAATTTCTTA--  
TCACAGCCCCACATCGCACAAACATTTTGGCAGCCATGCACTTTCCATGACCCACAATGAACAA  
TTGCTGACCCCGCCAAATAGGAAGCCGCCGAGCTCGGAAAGGGTTCCTTCAAGTACGCATGGG  
TTCTTGACAAGCTCAAGGCCGAGCGTGAGCGTGGTATCACCATTGATATCGCTCTCTGGAAGTT  
CGAGACCAACGAGTACAATGTCACCGTCATTGGTTAGTATCCCGGTCCACACCATGCACCATGC  
ATCCGACCTT-  
GTACTAACATCACAATACAGATGCTCCCGGTCACCGTGATTTTCATCAATGCTGCCTTCTGGTACG  
TAGTC-AATCTACCTCGACAC-GCCTCAATACGACAACCCTCCGCAATTCGACAAC--  
GACCTTCTCAACAACCTGCTTGGTTGGAACCAAAGAAAAGACCTGATACTGACCGGTCTCTGATA  
GGCAAACCATCTCTGGCGAGCACGGTCTCGACAGCAATGGAGTGTACGTACCCTTTCTTGGCT  
ACTTGCTTTCCACGAACATCTCAGCTAATACCCG-  
TGGTTGTTGAGCTACAACGGTACCTCTGAGCTCCAGCTCGAGCGCATGAGCGTCTACTTCAACG  
AGGCTTCCGGCAACAAGTACGTTCCCTCGTGCCGTCCTCGTCGATCTCGAGCCCGGCACCATGGA  
TGCCGTCCGCGCCGGTCTTTCCGGTCAGCTCTTCCGCCCTGACAACTTTGTCTTCGGTCAGTCCG  
GTGCC

>P\_inflexa\_MFLUCC\_12\_0270

?????CATTATAGAGTTTTCTAAACTCCCAACCCATGTGAACTTACC-  
ATTGTTGCCTCGGCAGAAGCTGCTCGGT-  
GCACCTTACCTTGAACGGCCTACCCTGTAGCGCCTTACCCTGGAACGGCTTACCCTGTAACGG  
CTGCCGGTGGACTACCAAACCTTTGTTATTTTATTGTAATCTGAGCGTCTTAT-  
TTAATAAGTCAAACTTTCAACAACGGATCTCTTGGTTCTGGCATCGATGAAGAACGCAGCGAA  
ATGCGATAAGTAATGTGAATTGCAGAATTCAGTGAATCATCGAATCTTTGAACGCACATTGCGC  
CCATTAGTATTCTAGTGGGCATGCCTGTTTCGAGCGTCATTTCAACCCTTAAGCCTAGCTTAGCGT  
TGGGAGCCTACTG--  
CTTTTATTAGCTGTAGCTCCTGAAATACAACGGCGGATCTGCGATATCCTCTGAGCGTAGTAA-  
TTTTTATCTCGCTTTTACTGGAGTTGCAGCGTCTTTAGCCGCTAAATCCCC-AA-  
TTTTAATGGTTGACCTCAGGTTAGTCATCCTCACAATCCC-ATCATCC-----CCATC-----  
TTCATCATCATCACCT--GGCAA----TACTTTTCCCAAC-GGTGCCGAAAATCT-G-----  
TTTTCGCACCTGCC-CACTTTCCAG--ACACGTACCC-----  
GCCGCACGACCCCGCGGTGCAAACGAAAAATTTCTTA--  
TCACAGCCCCACATCGCACAAACATTTTGGCAGCCATGCACTTTTCATGACCCACAACGACCAT  
TCGCTGACCCCGCCAAACAGGAAGCCGCCGAGCTCGGAAAGGGTTCCTTCAAGTACGCATGGG  
TTCTTGACAAGCTCAAGGCCGAGCGCGAGCGTGGTATCACCATTGATATCGCTCTCTGGAAGTT  
CGAGACCAACGAGTACAATGTCACCGTCATTGGTTAGTATCCCTGTCCACAACATGCATCATGC  
ATCCGAACTC-  
ATACTAACATGGCAATACAGATGCTCCCGGTCACCGTGACTTCATCAATGCTGCTTTCTGGTATG  
TAGCC-CA-CCACCTCGACAC-GGCTCAGCACGACG-CCTCCCGCAACTCCACGAC--  
GACGTTTTCAAC---  
TACTTGGTTGAAACCAAACGAAAGACTCGATACTGACCGGTCTCTGATAGGCAAACCATCTCTG  
GCGAGCACGGTCTCGACAGCAATGGAGTGTACGTACCCTTTCTTGGCTACTTGCTTTCCACG  
AACATGTCAGCTAACACTCG-  
TGCTTGCTCAGCTACAACGGTACCTCCGAGCTCCAGCTCGAGCGCATGAGCGTCTACTTCAACG  
AGGCTTCCGGTAAACAAGTACGTTCCCTCGTGCCGTCCTCGTCGATCTCGAGCCCGGTACCATGGA  
TGCCGTCCGCGCCGGTCTTTCCGGTCAGCTCTTCCGCCCTGACAACTTCGTCTTCGGTCAGTCCG



GTGCC

>P\_intermedia\_MFLUCC\_12\_0259

?????CATTATAGAGTTTTTTAAAC-TCCCAACCCATGTGAACTTACC-  
ATTGTTGCCTCGGCAGAAGCTACCTGGT--  
TACCTTACCTTGAACGGCCTACCCTGTAGCGCCTTACCCTGGAACGGCCTACCCTGTAACGGC  
TGCCGGTGGACTACCAAACCTTTGTTATTTTATTGTAATCTGAGCGTCTTATTTAATAAGTCAA  
ACTTTCAACAACGGATCTCTTGGTTCTGGCATCGATGAAGAACGCAGCGAAATGCGATAAGTAA  
TGTGAATTGCAGAATTCAGTGAATCATCGAATCTTTGAACGCACATTGCGCCCATTAGTATTCTA  
GTGGGCATGCCTGTTGAGCGTCATTTCAACCCTTAAGCCTAGCTTAGTGTGGGAGCCTACTG-  
-CTTTTGCTAGCGGTAGCTCCTGAAATACAACGGCGGATCTGCGATATCCTCTGAGCGTAGTAA-  
TTTTTATCTCGTTTTGACTGGAGTTGCAGCGTCTTAGCCGCTAAACCCCC-AA-  
TTTTAATGGTTGACCTCAGGTTAGTCATCCTCAA-TCCC-ATCATT-CCATC-----  
CTCATCATCATCGCCT--CGCAA----CA-TTTTCCAACC-GGTGCCGAGAATCT-G-----  
TTTTCGCATCTGCC-CATTTTCCAG--ACACTTACCC-----  
GCCGCACGACCCCGCGGTGCAAACGAAAAATTTCTTA--  
TCACAGCCCCACATCGCACAAACATTTTGGCAGCCATGCACTTTCCAAGACCCACAATGAACAT  
TTGCTGACCCCGCAAATAGGAAGCCGCCGAGCTCGGAAAGGGTTCCTTCAAGTACGCATGGG  
TTCTTGACAAGCTCAAGGCCGAGCGTGAGCGTGGTATCACCATCGATATCGCTCTCTGGAAGTT  
CGAGACCAACGAGTACAATGTCACCGTCATTGGTTAGTATTCTGTCCACACGATGTACTATGC  
ATCTGAATGT-  
ATACTAACATGGCAACACAGATGCTCCCGGTCACCGTGATTTTCATCAATGCTGCTTTCTGGTATG  
TTACC-TGTCTGCCTCGACACGGCCTTAATACGACAACCCCGCAACTCGACAAC--  
GACGTTCTCAACAAGTGCTTGGTTGGAAACAAGGGAAAGACTTGATACTGACCGGTCCCTGATA  
GGCAAACCATCTCTGGCGAACACGGTCTCGACAGCAATGGAGTGTACGTACCCTTTCTTAGCT  
ACTTGCTTTCCACGAACATCTTAGCTAACACTCG-  
TGGTTGTTGAGCTACAACGGTACCTCCGAGCTCCAGCTCGAGCGCATGAGCGTCTACTTCAACG  
AGGCATCCGGCAACAAGTACGTTCCCTCGTGCCGTCCTCGTATCTCGAGCCCGGTACCATGGA  
TGCCGTCCGCGCCGGTCTTTGCGTCAGCTCTTCCGCCCTGACAACTTCGTCTTCGGTCAGTCCG  
GTGCC

>P\_italiana\_MFLUCC\_12\_0657

????????????????????????????????????????????????????????????????  
????????????????????????????????????????????????????????????????  
????????????????????????????????????????????????????????????????  
CCTACCCTGTAACGGTTGCCGGTGGACTACCAAACCTCT  
TGTTATTTTATTGTAATCTGAGCGTCTTATTTAATAAGTCAAACTTTCAACAACGGATCTCTTG  
TTCTGGCATCGATGAAGAACGCACCGAAATGCGACAAGTAATGTGAATTGCAGAATTCAGTGAA  
TCATCGAATCTTTGAACGCACATTGCGCCCATTAGTATTCTAGTGGGCATGCCTGTTGAGCGTC  
TTTTCCACCCTAAGCCTAGCTTAGTGTGGGAGCCTACCG--  
CTTTTGCTATCGGTATCTCCTGAAATACAACGGCGGATCTGCGATATCCTCTGATCGTAGTAA-  
TTTTTATCTCGTTTTGACTGGAGTTGCAGCGTCTTAGCCGCTAAACCCCCCTAATTTTTTAATG  
GTTGACCTC????TAGTCATCCACACAATCCC-ATCATT-CCATC-----  
CCCCATTCCCATCTTATCATCATCGCCT----CAA----CA-TCTTCCAACC-  
GGTGCCGAAAATCT-G-----TTTTCGCACCTGCC-CATTTTCCAG--ACACTTACCC-----  
---GCCGCACGACCCCGCGGTGCAAACGAAAAATTTCTTA--  
TCACAGCCCCACATCGCACAAACATTTTGGCAGCCATGCACTTTCCAAGACCCACAATGAACAA  
TTGCTGACCCCGCAAATAGGAAGCCGCCGAGCTCGGAAAGGGTTCCTTCAAGTACGCATGGG

TTCTTGACAAGCTCAAGGCCGAGCGTGAGCGTGGTATCACCATTGATATCGCTCTCTGGAAGTT  
CGAGACCAATGAGTACAATGTCACCGTCATTGGTTAGTATCCCTGCCACACCATGTATCATGC  
ATCCGACCTT-  
GTGCTAACATGGCAACACAGATGCTCCCGGTCACCGTGACTTCATCAATGCTGCCTTTTGGTATG  
TAGCC-CATCTACCTCGACAC-GCCTCAATACGACACCCCCGGCAACTCGACAAC--  
GACGTTCTCAACAACTGCTTGGTTGGAAACAAAGGAAAGACTTGATACTGACCGGTCCTTGATA  
GGCAAACCATCTCTGGCGAGCACGGTCTCGACAGCAATGGAGTGTACGTACCCTTTCCTTGGCT  
ACTTGCTTTCCACGAACATCTCAGCTAACACTCG-  
TGGTTGTTTACGCTACAACGGTACCTCCGAGCTCCAGCTCGAGCGCATGAGCGTCTACTTCAACG  
AGGCTCCGGCAACAAGTACGTTCCCTCGTGCCGTCCTCGTATCTCGAGCCCGGTACCATGGA  
TGCCGTCCGCGCCGGTCTTTCGGTCAGCTCTTCCGCCCTGACAACTTCGTCTTCGGTCAGTCCG  
GTGCC

>P\_jesteri\_CBS\_109350

?????CATTATAGAGTTTTCAAACCCCAACCCATGTGAACTTACC-  
ACTGTTGCCTCGGCAGAGGCTACCCGGT----  
ACCTACCTCGAACGGCCTACCCTGTAGCGCCTTACCTGGGAGCGG-  
TTACCCTGTAGCGGCTGCCGGTGGACTACCAAACCTTGTATTTTATTGTAATCTGAGCGTCTTA  
TTTTAATAAGTCAAACTTTCAACAACGGATCTCTTGGTTCTGGCATCGATGAAGAACGCAGCGA  
AATGCGATAAGTAATGTGAATTGCAGAATTCAGTGAATCATCGAATCTTTGAACGCACATTGCG  
CCCATTAGTATTCTAGTGGGCATGCCTGTTTCGAGCGTCATTTCAACCCTTAAGCCTAGCTTAGTG  
TTGGGAGCCTACTAG-  
CCCTCGCGGCCTGTAGCTCCTGAAATACAACGGCGGATCTGCGATATCCTCTGAGCGTAGTAAT  
CTTACCTCTCGCTTTTGTACAGGATTCCCAGCATCT--AGCCGCTAAACCCCC-AA-  
TTTTAATGTTGACCTC????????????????????????????????????????????????  
????????????????????????????????????????????????????????????????  
????????????????????????????????????????????????????????????????  
????????????????????????????????????????????????????????????????  
????????????????????????????????????????????????????????????????  
????????????????????????????????????????????????????????????????  
????????????????????????????????????????????????????????????????  
????????????????????????????????????????????????????????????????  
TGCTGCCTTCTGGTACGTACCC-CGACTGCCTCGACAC-GCCTCATCACGACG-  
CCTCTGAGTACCCTAC-----GACGATTGGAAC-----  
AACTAGTGGCAGCAACATGGGAGGCATGATACTGACTGATCTTTGACAGGCAAACTATCTCTGG  
TGAGCACGGTCTCGACAGCAATGGAGTGTACGTACCATTTCTTGGCCACTCGCTTTCTGAAGA  
ACATGCAAGCTAAATTTTCG-  
TGGTCGATTAGTTACAACGGTACCTCCGAGCTCCAGCTCGAGCGTATGAGCGTCTACTTCAACG  
AGGCTCCGGCAACAAGTACGTTCCCGTGCCGTCCTCGTATCTCGAGCCCGGTACCATGGA  
TGCCGTCCGCGCTGGTCCCTTCGGTCAGCTCTTCCGCCCTGACAACTTTGTTTTCGGTCAATCCG  
GTGCT

>P\_jiangxiensis\_LC4399

????????????????????????????????????????ACCCATGTGAACTTACC-  
ATTGTTGCCTCGGCAGAAGCTACCTGGT--  
TACCTTACCTTGAACGGCCTACCCTGTAGCGCCTTACCCTGGAACGGCCTACCCTGTAACGGC  
TGCCGGTGGACTACCAAACCTTGTATTTTATTGTAATCTGAGCGTCTTATTTAATAAGTCAA  
ACTTTCAACAACGGATCTCTTGGTTCTGGCATCGATGAAGAACGCAGCGAAATGCGATAAGTAA

TGTGAATTGCAGAATTCAGTGAATCATCGAATCTTTGAACGCACATTGCGCCCATTAGTATTCTA  
GTGGGCATGCCTGTTTCGAGCGTCATTTCAACCCTTAAGCCTAGCTTAGTGTGGGAGCCTACTG-  
-CTTTTGCTAGCGGTAGCTCCTGAAATACAACGGCGGATCTGCGATATCCTCTGAGCGTAGTAA-  
TTTTATCTCGCTTTTGACTGGAGTTGCAGCGTCTTAGCCGCTAAACCCCC-AA-  
TTTTAATGGTTGACCTCAGGTTAGTTATCCTCACAATCCC-ATCATTC-----CCATC-----  
--ATCATCGTCGCCT--CGCGAA----CA-TTCCCAACC-GGTGCCGAGAATCT-G-----  
TTTTCGCACCTGCC-CATTTTCCCAG--ACACTTACCCC-----  
GCCGCACGACCCCGCGGTGCAAACGAAAAATTTCTTA--  
TCACAGCCCCACATCGCACAAACATTTTGGCAGCCATGCACCTTCCAAGACCCACAATGAACAA  
TTGCTGACCCCGCCAAATAGGAAGCCGCGAGCTCGGAAAGGGTTCCTTCAAGTACGCATGGG  
TTCTTGACAAGCTCAAGGCCGAGCGTGAGCGTGGTATCACCATCGATATCGCTCTCTGGAAGTT  
CGAGACCAACGAGTACAATGTCACCGTCATTGGTTAGTAACCTTGTCCATACGATGTACCATGC  
ATCTGAATGT-  
ATACTAACATGGCAAACAGATGCTCCCGGTCACCGTGATTCATCAATGCTGCCTTTTGGTATG  
TAGCC-CATCTACCTCGACAC-GCCTCAATACGACAACCCCGCAACTCGACAAC--  
GACGTTCTCAACAAGTGCTTGGTTGGAAACAAGGGAAAGACTTGATACTGACCGGTCCCTGATA  
GGCAAACCATCTCTGGCGAGCACGGTCTCGACAGCAATGGAGTGTACGTACCCTTTCCTTGGCT  
ACTTGCTTTCCACGAACATCTCAGCTAACACTCG-  
TGGTTTTTCAGCTACAACGGTACCTCCGAGCTCCAGCTCGAGCGCATGAGCGTCTACTTCAACG  
AGGCTTCCGGCAACAAGTACGTTCCCTCGTGCCGTCTCGTCGATCTCGAGCCCGGTACCATGGA  
TGCCGTCCGCGCCGGTCTTTCGGTCAGCTCTTCCGCCCTGACAACTTCGTCTTCGGTCAGTCCG  
GT???

>P\_jinchanghensis\_LC6636

????????????????????????????????????????????????????????TGTGAACTTACC-  
ATTGTTGCCTCGGCAGAAGCTGCTCGGT-  
ATACCCTACCTTGGAACGGCCTACCCTGTAGCGCCTTACCCTGGAACGGCTTACCCTGCAACGG  
CTGCCGGTGGACTACTAACTCTTGTTATTTTATTGTAATCTGAGCGTCTTATTTAATAAGTCAA  
AACTTTCAACAACGGATCTCTTGTTCTGGCATCGATGAAGAACGCAGCGAAATGCGATAAGTA  
ATGTGAATTGCAGAATTCAGTGAATCATCGAATCTTTGAACGCACATTGCGCCCATTAGTATTCT  
AGTGGGCATGCCTGTTTCGAGCGTCATTTCAACCCTTAAGCCTAGCTTAGTGTGGGAGCCTACT  
G--  
CTTTTGCTAGCTGTAGCTCCTGAAATACAACGGCGGATCTGCGATATCCTCTGAGCGTAGTAA-  
TTTTATCTCGCTTTTGACTGGAGTTGCAGCGTCTTAGCCGCTAAACCCCC-AA-  
TTTTAATGGTTGACCTCAGGTTAGTCATCCTCGCAATCCC-ATCATCC-----  
CCATTCTCAT-ACCT--CGCAA----CG-TTTTCCAACC-GGTGCCGAAAATCT-G-----  
TTTTCGCACCTGCC-CATTTTCCCAG--ACACTTACCCC-----  
GCCGCACGACCCCGCGGTGCAAACGAAAAATTTCTTA--TCACAGCCCCACTTCACAC-  
AACATTTTGGCAGCCACGCACTTTGCATGACCCACAGTGAACAATTGCTAACCCCGCCAAATAG  
GAAGCCGCGAGCTCGGAAAGGGTTCCTTCAAGTACGCATGGGTTCTTGACAAGCTCAAGGCC  
GAGCGTGAGCGTGGTATCACCATTGATATCGCTCTCTGGAAGTTCGAGACCAACGAGTACAATG  
TCACCGTCATTGGTTAGTATCCCTGTTACAGAATGTACCATGTCTCCGAATC-  
AGACTAACATCACAACACAGACGCTCCCGGTCACCGTGATTCATCAATGCTGCCTTCTGGTAT  
GTAGCC-CATCTACCTCGGCAC-GCCTCAATACGACA-CCCTCCGCAACTCGACGAC--  
GACATTCTCGGC---

TACTTGGTTGGAACCGAACGAAAGACTTGATACTGACCGGTCTCTGATAGGCAAACCATCTCTG  
GCGAGCACGGTCTCGACAGCAATGGAGTGTACGTACCATTTCCCTTGCCTACTTGCTTTCCCACG  
AACATGTTAGCTAACACTCG-  
TGCTTGCTCAGCTACAACGGCACCTCCGAGCTCCAGCTCGAGCGCATGAGCGTCTACTTCAACG  
AGGCGTCCGGCAACAAGTACGTTCCCTCGTGCCGTCCCTCGTCGATCTCGAGCCCGGTACCATGGA  
CGCCGTCCGCGCCGGTCTTTTCGGCCAGCTCTTCCGCCCTGACAACTTCGTCTTCGGTCAGTCC  
GGTGCC

>P\_kaki\_KNU\_PT\_1804

AGGGATCATTATAGAGTTTTCTAAACTCCCAACCCATGTGAACTTACC-  
ATTGTTGCCTCGGCAGAAGCTGCTCGGT-  
GCACCCTACCTTGGAACGGCCTACCCTGTAGCGCCTTACCCTGGAACGGCTTACCCTGTAACGG  
CTGCCGGTGGACTACCAAACCTTTGTTATTTTATTGTAATCTGAGCGTCTATTTTAATAAGTCAA  
AACTTTCAACAACGGATCTCTTGTTCTGGCATCGATGAAGAACGCAGCGAAATGCGATAAGTA  
ATGTGAATTGCAGAATTCAGTGAATCATCGAATCTTTGAACGCACATTGCGCCATTAGTATTCT  
AGTGGGCATGCCTGTTTCGAGCGTCATTTCAACCCTAAGCCTAGCTTAGTGTGGGAGCCTACT  
G--

CTTTTGCTAGCTGTAGCTCCTGAAATACAACGGCGGATCTGCGATATCCTCTGAGCGTAGTAAAT  
TTTTATCTCGCTTTTGACTGGAGTTGCAGCGTCTTTGGCCGCTAAATCCCC-AA-  
TTTTAATGGTTGACCTCAGGTTAGTCATCCTCGCAATCCC-ATCATCC-----TCATC-----  
CTCATCATCATCACTT--CGCAA----CATTTCCACACC--GGTGTGAAAATCTGG-----  
TTTTCGCACCTGCC-CATTTTCTCAG--ACACTTACCCC-----  
GCCGCACGACCCCGCGGTGCAAACGAAAAATTTCTTA--  
TCACAGCCCCACATCACACAAACATTTTGGCAGCCACGCACCTTGCATGACCCACAATGAACAA  
TTGCTGACCCCGCCAAATAGGAAGCCGCCGAGCTCGGAAAGGGTTCCTTCAAGTACGCATGGG  
TTCTTGACAAGCTCAAGGCCGAGCGTGAGCGTGGTATCACCATTGATATCGCTCTCTGGAAGTT  
CGAGACCAACGAGTACAATGTCACCGTCATTGGTTAGTATCCCTGCCACAATATGTGTATGT  
CTCTGAACTCAAGACTAACCTTGAATACAGACGCTCCCGGTACCGTGATTTTCATCAA????????  
?????ATGTAGCC-CATCTACCTCGACGC-GCCTCAATACGACACCCCCCGGCAACTCGACAAC-  
-GACATTCTTAAC---

TGCTTGTGGTGGAAACCATACAAAAGACTTGATACTGACCGGTCTATGATAGGCAAACCATCTCTG  
GCGAGCACGGTCTCGACAGCAATGGAGTGTATGTACCCTTTCCCTGGCTACTCGCTTCTCTG  
AACATGTCAGCTAACAGTCG-  
TGCTTGTTCAGCTACAACGGTACCTCCGAGCTCCAGCTCGAGCGCATGAGCGTCTACTTCAACG  
AGGCTTCCGGCAACAAGTACGTTCCCTCGTGCCGTCCCTCGTCGATCTCGAGCCCGGTACCATGGA  
TGCCGTCCGCGCCGGTCTTTTCGGTCAGCTCTTCCGCCCTGACAACTTCGTCTTCGGTCAGTCCG  
GTGCC

>P\_kandelicola\_NCYU\_19\_0355

AGGGATCATTATAGAGTTTTCTAAACTCCCAACCCATGTGAACTTACC-  
ATTGTTGCCTCGGCAGAAGCTGCTCGGT-  
GCACCTACCTTGGAACGGCCTACCCTGTAGCGCCTTACCCTGGAACGGCTTACCCTGTAGCGG  
CTGCCGGTGGACTACCAAACCTTTGTTATTTTATTGTAATCTGAGCGTCTATTTTAATAAGTCAA  
AACTTTCAACAACGGATCTCTTGTTCTGGCATCGATGAAGAACGCAGCGAAATGCGATAAGTA  
ATGTGAATTGCAGAATTCAGTGAATCATCGAATCTTTGAACGCACATTGCGCCATTAGTATTCT  
AGTGGGCATGCCTGTTTCGAGCGTCATTTCAACCCTAAGCCTAGCTTAGTGTGGGAGCCTACT



AACATGTCAGCTAACAGTCG-  
TGCTTGTTTCAGCTACAACGGTACCTCCGAGCTCCAGCTCGAGCGCATGAGCGTCTACTTCAACG  
AGGCTCCGGCAACAAGTACGTTCTCGTGCCGTCTCGTCGATCTCGAGCCCGGTACCATGGA  
TGCCGTCCGCGCCGGTCTTTTCGGTCAGCTCTTCCGCCCTGACAACTTCGTCTTCGGTCAGTCCG  
GTGCC

>P\_knightiae\_CBS\_111963

AGGGATCATTATAGAGTTTTCTAAACTCCCAACCCATGTGAACTTACC-  
ATTGTTGCCTCGGCAGAAGCTGCTCGGT-  
ACACCCTACCTTGGAACGGCCTACCCTGTAGCGCCTTACCCTGGAACGGCTTACCCTGTAGCGG  
CTGCCGGTGGACTACCAAACCTTTGTTATTTTATTGTAATCTGAGCGTCTTATTTTAATAAGTCAA  
AACTTTCAACAACGGATCTCTTGTTCTGGCATCGATGAAGAACGCAGCGAAATGCGATAAGTA  
ATGTGAATTGCAGAATTCAGTGAATCATCGAATCTTTGAACGCACATTGCGCCATTAGTATTCT  
AGTGGGCATGCCTGTTTCGAGCGTCATTTCAACCCTTAAGCCTAGCTTAGTGTGGGAGCCTACT  
G--

CTTTTACTAGCTGTAGCTCCTGAAATACAACGGCGGATCTGCGATATCCTCTGAGCGTAGTAA-  
TTTTATCTCGCTTTTACTGGAGTTGCAGCGTCTTAGCCGCTAAATCCCC-AA-  
TTTTAATGGTTGACCTCAGTTAGTCATCCTCGCAATCCC-ATCATCG-----TCATC-----  
CTCATCATCACCT--CGCAA----CA-TTCCACACC-GGTGCCGAAAATCTGG-----  
TTTTCGCACCTGCC-CATTTTCCCAC--ACACTTACCC-----  
GCCGCACGACCCCGCGGTGCAAACGAAAAATTTCTTA--

TCATAGCCCCACATCACACAAACATTTTGGCAGCCACGCACTTTGCAAGACCCACAATGAACAA  
TTGCTGACCCCGCCAAATAGGAAGCCGCCGAGCTCGGAAAGGGTTCCTTCAAGTACGCATGGG  
TTCTTGACAAGCTCAAGGCCGAGCGTGAGCGTGGTATCACCATTGATATCGCTCTCTGGAAGTT  
CGAGACCAACGAGTACAATGTCACCGTCATTGGTTAGTATCCCTGTCCACAACATGCATCATGT  
CTTTGAACTCAAGACTAACCTTGCCTACAGACGCTCCCGGTCACCGTGATTTTCAATGCTGC  
CTTCTGGTATGTAGCC-CATCTACCTCGACGC-

GCCTCGATACGACACCCCGGCAACTCGACAAC--GACATTCTCAAC---  
TGCTTGTTTGAATCATACGAAAGACTTGATACTGACCGGTCTATGATAGGCAAACCATCTCTGG  
CGAGCACGGTCTCGACAGCAATGGAGTGACGTACCCTTTCCTTGGCTACTTGCTTTCTCGTGAA  
CATGTCAGCTAACACTCG-

TGCTTGTTTCAGCTACAACGGTACCTCCGAGCTCCAGCTCGAGCGCATGAGCGTCTACTTCAACG  
AGGCTCCGGCAACAAGTACGTTCTCGTGCCGTCTCGTCGATCTCGAGCCCGGTACCATGGA  
TGCCGTCCGCGCCGGTCTTTTCGGTCAGCTCTTCCGCCCTGACAACTTCGTATTTCGGTCAGTCCG  
GTGCC

>P\_knightiae\_CBS\_114138

AGGGATCATTATAGAGTTTTCTAAACTCCCAACCCATGTGAACTTACC-  
ATTGTTGCCTCGGCAGAAGCTGCTCGGT-  
ACACCCTACCTTGGAACGGCCTACCCTGTAGCGCCTTACCCTGGAACGGCTTACCCTGTAGCGG  
CTGCCGGTGGACTACCAAACCTTTGTTATTTTATTGTAATCTGAGCGTCTTATTTTAATAAGTCAA  
AACTTTCAACAACGGATCTCTTGTTCTGGCATCGATGAAGAACGCAGCGAAATGCGATAAGTA  
ATGTGAATTGCAGAATTCAGTGAATCATCGAATCTTTGAACGCACATTGCGCCATTAGTATTCT  
AGTGGGCATGCCTGTTTCGAGCGTCATTTCAACCCTTAAGCCTAGCTTAGTGTGGGAGCCTACT  
G--

CTTTTACTAGCTGTAGCTCCTGAAATACAACGGCGGATCTGCGATATCCTCTGAGCGTAGTAA-

TTTTATCTCGCTTTGACTGGAGTTGCAGCGTCTTAGCCGCTAAATCCCC-AA-  
TTTTAATGGTTGACCTCAGGTTAGTCATCCTCGCAATCCC-ATCATCG-----TCATC-----  
CTCATCATCACCT--CGCAA----CA-TTCCACACC-GGTGCCGAAAATCTGG-----  
TTTTCGCACCTGCC-CATTTTCCCAC--ACACTTACCC-----  
GCCGCACGACCCCGCGGTGCAAACGAAAAATTTCTTA--  
TCATAGCCCCACATCACACAAACATTTTGGCAGCCACGCACTTTGCAAGACCCACAATGAACAA  
TTGCTGACCCCGCAAATAGGAAGCCGCCGAGCTCGGAAAGGGTTCCTTCAAGTACGCATGGG  
TTCTTGACAAGCTCAAGGCCGAGCGTGAGCGTGGTATCACCATTGATATCGCTCTCTGGAAGTT  
CGAGACCAACGAGTACAATGTCACCGTCATTGGTTAGTATCCCTGTCCACAACATGCATCATGT  
CTTTGAACTCAAGACTAACCTTGCCTACAGACGCTCCCGGTACCCGTGATTTTCATCAATGCTGC  
CTTCTGGTATGTAGCC-CATCTACCTCGACGC-  
GCCTCGATACGACACCCCGGCAACTCGACAAC--GACATTCTCAAC---  
TGCTTGTTTGAATCATAACGAAAGACTTGATACTGACCGGTCTATGATAGGCAAACCATCTCTGG  
CGAGCACGGTCTCGACAGCAATGGAGTGTACGTACCCTTTCCTTGGCTACTTGCTTTCTCGTGAA  
CATGTCAGCTAACACTCG-  
TGCTTGTTGAGCTACAACGGTACCTCCGAGCTCCAGCTCGAGCGCATGAGCGTCTACTTCAACG  
AGGCTCCGGCAACAAGTACGTTCCCTCGTGCCGTCTCGTATCTCGAGCCCGGTACCATGGA  
TGCCGTCCGCGCCGGTCTTTCGGTACGCTTCCGCCCTGACAACTTCGTATTCGGTACGTCGG  
GTGCC

>P\_licualacola\_HGUP4057

AGGGATCATTATAGAGTTTTCTAAACTCCCAACCCATGTGAACTTACC-  
ATTGTTGCCTCGGCAGAAGCTGCTCGGT-  
ATACCCTACCTTGAACGGCCTACCCTGTAGCGCCTTACCCTGGAACGGCTTACCCTGCAACGG  
CTGCCGGTGGACTACCAAACCTTTGTTATTTTATTGTAATCTGAGCGTCTTATTTAATAAGTCAA  
AACTTTCAACAACGGATCTCTTGGTTCTGGCATCGATGAAGAACGCAGCGAAATGCGATAAGTA  
ATGTGAATTGCAGAATTCAGTGAATCATCGAATCTTTGAACGCACATTGCGCCATTAGTATTCT  
AGTGGGCATGCCTGTTTCGAGCGTCATTTCAACCCTAAGCCTAGCTTAGTGTGGGAGCCTACT  
G--  
CTTTGCTAGTTGTAGCTCCTGAAATACAACGGCGGATCTGCGATATCCTCTGAGCGTAGTAA-  
TTTTATCTCGCTTTGACTGGAGTTGCAGCGTCTTAGCCGCTAAACCCCC-AA-  
TTTTAATGGTTGACCTCAGGTTAGTCATGCTCACA-TCCC-ATCATCC-----TCATC-----  
--ATCATCATCGCCT--CGCAA----CA-TTTTCCAACC-GGTGCCGAAATTCT-G-----  
TTTTCGCACCTGCC-CATTTTCCAG--ACACTTACCC-----  
GCCGCACGACCCCGCGGTGCAAACGAAAAATTTCTTATCTCACAGCCCCACTTCACAC-  
AACATTTTGGCAGCCACGCACTTTGCATGACCCACAATGAACAATTGCTGACCCCGCAAATAG  
GAAGCCGCCGAGCTCGGAAAGGGTTCCTTCAAGTACGCATGGGTTCTTGACAAGCTCAAGGCC  
GAGCGTGAGCGTGGTATCACCATTGATATCGCTCTCTGGAAGTTCGAGACCAACGAGTACAATG  
TCACCGTCATTGGTTAGTATCCCTGTCCATAGAAAGTATCATGTGTCCGAACTC-  
AGACTAACATCGCAATACAGACGCTCCCGGTACCCGTGATTTTCATCAA????????????GAGGATA  
GTC--ATCTACCTCGACAC-GCCTC-ATACGACA-CCCTCCGCAACTCGACGAC--  
GGCATTCTCGGC---  
TACTTGTTGGAACCAAACGAAAGACTTGATACTGACCGGTCTCTGATAGGCAAACCATCTCTG  
GCGAGCACGGTCTCGACAGCAATGGAGTGTACGTACCCTTTCCTTGGCTACTTGCTTTCCACG  
AACATGTTAGCTAACACTCG-

TGCTTGCTCAGCTACAACGGCACCTCGGAGCTCCAGCTCGAGCGCATGAGCGTCTACTTCAACG  
AGGCTTCCGGCAACAAGTACGTTCTCGTGCTGTCCTCGTCGATCTCGAGCCTGGTACCATGGA  
CGCGTCCGCGCCGGTCTTTTCGGCCAGCTCTCCGCCCTGACAACTTCGTCTTCGGTCAGTCC  
GGTGCC

>P\_linearis\_MFLUCC\_12\_0271

?????CATTATAGAGTTTTTAAACTCCCAACCCATGTGAACTTACC-  
ATTGTTGCCTCGGCAGAAGCTACCTGGT--  
TACCTTACCTTGAACGGCCTACCCTGTAGCGCCTTACCCTGGAACGGCCTACCCTGTAACGGC  
TGCCGGTGGACTACCAAACCTTTGTTATTTTATTGTAATCTGAGCGTCTTATTTAATAAGTCAAA  
ACTTTCAACAACGGATCTCTTGGTTCTGGCATCGATGAAGAACGCAGCGAAATGCGATAAGTAA  
TGTGAATTGCAGAATTCAGTGAATCATCGAATCTTTGAACGCACATTGCGCCCATTAGTATTCTA  
GTGGGCATGCCTGTTTCGAGCGTCATTTCAACCCTTAAGCCTAGCTTAGTGTGGGAGCCTACTG-  
-CTTTTGCTAGCGGTAGCTCCTGAAATACAACGGCGGATCTGCGATATCCTCTGAGCGTAGTAA-  
TTTTTATCTCGTTTTGACTGGAGTTGCAGCGTCTTAGCCGCTAAACCCCC-AA-  
TTTTAATGGTTGACCTCAGGTTAGTCATCCTCAAA-TCCC-ATCATTC-----CCATC-----  
CTCATCATCATCGCCT--CGCAA----CA-TTTTCCAACC-GGTGCCGAGAATCT-G-----  
TTTTCGCACCTGCC-CATTTTCCAG--ACACTTACCC-----  
GCCGCACGACCCCGCGGTGCAAACGAAAAATTTCTTA--  
TCACAGCCCCACATCGCACAAACATTTTGGCAGCCATGCACTTTCCAAGACCCACAATGAACAT  
TTGCTGACCCCGCAAATAGGAAGCCGCGGAGCTCGGAAAGGGTTCCTCAAGTACGCATGGG  
TTCTTGACAAGCTCAAGGCCGAGCGTGAGCGTGGTATCACCATCGATATCGCTCTCTGGAAGTT  
CGAGACCAACGAGTACAATGTCACCGTCATTGGTTAGTATCCCTGTCCACACGATGTACCATGC  
ATCTGAATGT-  
ATACTAACATGGCAACACAGATGCTCCCGGTCACCGTGATTTTCATCAATGCTGCTTTCTGGTATG  
TAACC-TGTCTGTCTCGACACCGCCTC-ATACGACAAC-----GACGTTCTA---C--  
GACGTTCTCAACAAGTGCTTGGTTGGAAACAAGGGAAAGACTTGATACTGACCGGTCCCTGATA  
GGCAAACCATCTCTGGCGAACACGGTCTCGACAGCAATGGAGTGTACGTACCCTTTCTTAGCT  
ACTTG-TTTCCACGAACATCTTAGCTAACACTCG-  
TGGTTGTTTCAGCTACAACGGTACCTCCGAGCTCCAGCTCGAGCGCATGAGCGTCTACTTCAACG  
AGGCTTCCGGCAACAAGTACGTTCTCGTGCCGTCCTCGTCGATCTCGAGCCCGGTACCATGGA  
TGCCGTCCGCGCCGGTCTTTTCGGTCAGCTCTCCGCCCTGACAACTTCGTCTTCGGTCAGTCCG  
GTGCC

>P\_longiappendiculata\_LC3013

????????????????????????????????????ACCCATGTGAACTTACC-  
ATTGTTGCCTCGGCAGAAGCTACCCGGT---  
ACCTTACCTTGAACGGCCTACCCTGTAGCGCCTTACCCTGGAACGGCTTACCCTGCAGCGGCT  
GCCGGTGGACTACCAAACCTTTGTTATTTTATGTTATCTGAGCGTCTTATTTAATAAGTCAAAA  
CTTTCAACAACGGATCTCTTGGTTCTGGCATCGATGAAGAACGCAGCGAAATGCGATAAGTAAT  
GTGAATTGCAGAATTCAGTGAATCATCGAATCTTTGAACGCACATTGCGCCCATTAGTATTCTAG  
TGGGCATGCCTGTTTCGAGCGTCATTTCAACCCTTAAGCCTAGCTTAGTGTGGGAGCCTACTG--  
CTTTTGTTAGCTGTAGCTCCTGAAATACAACGGCGGATCTGCGATATCCTCTGAGCGTAGTAATT  
TTTTCTCGCTTTTACTGGAGTTGCAGCGTCTTAGCCGCTAAACCCCC-AA-  
TTTTAATGGTTGACCTCAGGTTAGTTATCCTCAAAATCC-ATCATCC-----  
TCACTATCATTACCT--CGCAA----TA-CTTCCAACC-GGTGTCGAAAATAT-



GTGCTTCTTTTTTCGCGCCTGCC-CACATCCCCAG--ACACTTACCCC-----  
GCCGCACGACCCCGCGGTGCAAACGAAAAATTTCTTA--  
TCACAGCCCCACACCGCACAAACATTTTGGCAGCCATGCACTTTTCATAACCCAC-  
ACGAGCATTGCTGACCCCGCCAAATAGGAAGCCGCCGAGCTCGGAAAGGGTTCCTTCAAGTA  
CGCATGGGTTCTTGACAAGCTCAAGGCCGAGCGTGAGCGTGGTATCACCATCGATATCGCTCTC  
TGGAAGTTCGAGACCAACGAGTACAATGTCACCGTCATTGGTTAGTATCCCTGTCCACA---  
TCCATCATGCATCCGAAATC-  
AGACTAACACGGCACCACAGATGCTCCCGGTCACCGTGATTTTCATCAATGCTGCCTTCTGGTAT  
GTATCC-TATCTACCTCGGCATTGCCTCGATATGACGCCTTTTGACGAGTCTACGAC--  
GACCTTG--AAC----  
GCTTGATTAGGTCACGGATAAAAACACGATGCTAATGGGTGATTGATAGGCAAACCATCTCTGG  
CGAGCACGGTCTCGACAGCAATGGAGTGACGTACCATCTCC-T-CCGA-  
TTGCTTCTTGTTGAGCACACGAACTAATTGTG--  
GCCTTGTTAGCTACAACGGTACCTCCGAGCTCCAGCTCGAGCGCATGAGTGTCTACTTCAATGA  
GGCTTCCGGCAACAAGTACGTCCCTCGTGCCGTTCTCGTCGATCTCGAGCCTGGTACCATGGAT  
GCCGTCCGCGCCGGTCCCTTCGGTCAGCTTTCCGCCCTGACAACTTCGTCTT?????????????  
>P\_lushanensis\_LC4344  
????????????????????????????????????ACCCATGTGAACCTACC-  
ATTGTTGCCTCGGCAGAAGCTGCTCGGT-  
GCACCTACCCTGGAACGGCCTACCCTGTAGCGCCTTACCCTGGAACGGCTTACCCTGTAGCGG  
CTGCCGGTGGACTACCAAACCTTTGTTATTTTATTGTAATCTGAGCGTCTTATTTAATAAGTCAA  
AACTTTCAACAACGGATCTCTTGGTTCTGGCATCGATGAAGAACGCAGCGAAATGCGATAAGTA  
ATGTGAATTGCAGAATTCAGTGAATCATCGAATCTTTGAACGCACATTGCGCCATTAGTATTCT  
AGTGGGCATGCCTGTTGAGCGTCATTTCAACCCTTAAGCCTAGCTTAGTGTGGGAGCCTACT  
G--  
CTTTTGCTAGCGGTAGCTCCTGAAATACAACGGCGGATCTGCGATATCCTCTGAGCGTAGTAA-  
TTTTATCTCGTTTTGACTGGAGTTGCAGCGTCTTTAGCCGCTAAATCCCC-AA-  
TTTTAATGGTTGACCTCAGGTTAGTCATCCTCACAATCCC-ATCATCC-----  
CCATCATCATCGTCT--CGCAA---CA-TTTTCCAACCT-GGTGCCGAAAATCT-G-----  
TTTTCGCACCTGCC-CATTTTCCCAG--ACACTTACCCC-----  
GCCGCACGACCCCGCGGTGCAAACGAAAAATTTCTTA--  
TCACAGCCCCACATCGCACAAACATTTTGGCAGCCATGCACTTTCCATGACCCACAATGAACAA  
TTGCTGACCCCGCCAAATAGGAAGCCGCCGAGCTCGGAAAGGGTTCCTTCAAGTACGCATGGG  
TTCTTGACAAGCTCAAGGCCGAGCGTGAGCGTGGTATCACCATTGATATCGCTCTCTGGAAGTT  
CGAGACCAACGAGTACAATGTCACCGTCATTGGTTAGTATCCCGGTCCACACCATGCACCATGC  
ATCCGACCTT-  
GTACTAACATACAATACAGATGCTCCCGGTCACCGTGATTTTCATCAATGCTGCCTTCTGGTACG  
TAGTC-CATCTACCTCGACAC-GCCTCAATACGACAACCCTCCGCAACTCGACAAC--  
GACCTTCTCAACAACCTGCTTGGTTGGAACCAAAGAAAAGACCTGATACTGACCGGTCTCTGATA  
GGCAAACCATCTCTGGCGAGCACGGTCTCGACAGCAATGGAGTGTACGTACCTTTCTTGGCT  
ACTTGCTTTCCACGAACATCTCAGCTAATACCCG-  
TGATTGTGCAGCTACAACGGTACCTCTGAGCTCCAGCTCGAGCGCATGAGCGTCTACTTCAACG  
AGGCTTCCGGCAACAAGTACGTTCTCGTGCCGTCTCGTCGATCTCGAGCCCGGTACCATGGA  
TGCCGTCCGCGCCGGTCCCTTCGGTCAGCTTTCGCCCTGACAACTTTGTCTTCGGTCAGTCCG

GTGCC

>P\_macadamiae\_BRIP\_63738B

????????????????????AAACTCCCAACCCATGTGAACTTACC-  
ATTGTTGCCTCGGCAGAAGCTGCTCGGT-  
GCACCCTACCTTGGAACGGCCTACCCTGTAGCGCCTTACCCTGGAACGGCTTACCCTGGAACG  
GCTGCCGGTGGACTACCAAACCTTGTATTTTATTGTAATCTGAGCGTCTTATTTAATAAGTCA  
AAACTTTCAACAACGGATCTCTTGGTTCTGGCATCGATGAAGAACGCAGCGAAATGCGATAAGT  
AATGTGAATTGCAGAATTCAGTGAATCATCGAATCTTTGAACGCACATTGCGCCCATTAGTATTC  
TAGTGGGCATGCCTGTTGAGCGTCATTTCAACCCTTAAGCCTAGCTTAGTGTGGGAGCCTACT  
G--  
CTTTTGCTAGCTGTAGCTCCTGAAATACAACGGCGGATCTGCGATATCCTCTGAGCGTAGTAAAT  
TTTTATCTCGCTTTTACTGGAGTTGCAGCGTCTTTGGCCGCTAAATCCCC-AA-  
TTTTAATGTTGACCTC????????????????????????????????????????????????  
????????????????????????????????????????????????????????????????  
????????????????????????????????????????????????????????????????  
CATTCTCAG--ACACTTACCC--  
GCCGCACGACCCCGCGGTGCAAACGAAAAATTTCTTA--  
TCACAGCCCCACATCACACAAACATTTTGGCAGCCACGCACCTTGCATGACCCACAATGAACAA  
TTGCTGACCCCGCAAATAGGAAGCCGCGGAGCTCGGTAAGGGTTCCTCAAGTACCTGTG???  
????????????????????????????????????????????????????????????????  
????????????????????????????????????????????????????????????????  
????????????????????????????????????????????????????????????????  
????????????????????????????????????????????????????????????????  
????????????????????????????????????????????????????????????????  
GACATTCTTAAC---

>P\_malayana\_CBS\_102220

AGGGATCATTATAGAGTTTTCTAAACTCCCAACCCATGTGAACTTACC-  
ATTGTTGCCTCGGCAGAAGCTGCTCGGT-  
GCACCTACCTTGGAACGGCCTACCCTGTAGCGCCTTACCCTGGAACGGCTTACCCTGCAACGG  
CTGCCGGTGGACTACTAAACTCTTGTATTTTATTGTAATCTGAGCGTCTTATTTAATAAGTCAA  
AACTTTCAACAACGGATCTCTTGGTTCTGGCATCGATGAAGAACGCAGCGAAATGCGATAAGTA  
ATGTGAATTGCAGAATTCAGTGAATCATCGAATCTTTGAACGCACATTGCGCCCATTAGTATTCT  
AGTGGGCATGCCTGTTGAGCGTCATTTCAACCCTTAAGCCTAGCTTAGTGTGGGAGCCTACT  
G--  
CTTTTGCTAGCGGTAGCTCCTGAAATACAACGGCGGATCTGCGATATCCTCTGAGCGTAGTAA-  
TTTTATCTCGCTTTTACTGGAGTTGCAGCGTCTTTAGCCGCTAAACCCCC-AA-  
TTTTAATGTTGACCTCAGTTAGTCATGCTCACAGTCCC-ATCATCC-----TCATC-----  
--ACCATCATCGCCT--CGCAA----CA-TTTCCAACC-GTTGCCGAAATTCT-G-----  
TTTTCGCACCTGCC-CATTTCCAG--ACAATTACCC-----  
GCCGCACGACCCCGCGGTGCAAACGAAAAATTTCTTA--TCACAGCCCCACTTCACAC-

AACATTTTGGCAGCCACGCACTTTGCATGACCCACAATGAACAATTGCTGACCCCGCCAAATAG  
GAAGCCGCCGAGCTCGGAAAGGGTTCCTTCAAGTACGCATGGGTTCTTGACAAGCTCAAGGCC  
GAGCGTGAGCGTGGTATCACCATTGATATCGCTCTCTGGAAGTTCGAGACCAACGAGTACAATG  
TCACCGTCATTGGTTAGTATCCGTGTCCACAGAAAGTATCATGTGTCCGAACTC-  
AGACTAACATTGCAATACAGACGCTCCCGGTCACCGTGATTCATCAATGCTGCCTTCTGGTATG  
TAGCC-CAACTACCTCGACAC-GCCTCAATACGACA-CCCTCCACAACCTCGACGAC--  
GGCATTCTCGGC---  
TACTTGGTTGGAACCAAACGAAAGACTTGATACTGACCGGTCTCTGATAGGCAAACCATCTCTG  
GCGAGCACGGTCTCGACAGCAATGGAGTGTACGTACCGCTTCTTGGCTACTTGCTTTCCACG  
GACTTGTTAGCTAACACTCG-  
TGCTTGCTCAGCTACAACGGCACCTCCGAGCTCCAGCTCGAGCGCATGAGCGTCTACTTCAACG  
AGGCTTCCGGCAACAAGTACGTTCTCGTGCTGTCTCGTATCTCGAGCCCGGTACCATGGA  
CGCGTCCGCGCCGGTCTTTTCGGCCAGCTCTCCGCCCTGACAACCTCGTCTTCGGTCAGTCC  
GGTGCC

>P\_monochaeta\_CBS\_144\_97

AGGGATCATTATAGAGTTTTCTAAACTCCCAACCCATGTGAACTTACC-  
ATTGTTGCCTCGGCAGAAGCTACCTGGT--  
TACCTACCTTGGAACGGCCTACCCTGTAGCGCCTTACCCTGGAACGGCCTACCCTGTAACGGC  
TGCCGGTGGACTACCAAACCTTGTATTTTTATTGTAATCTGAGCGTCTTATTTAATAAGTCAAA  
ACTTTCAACAACGGATCTCTTGGTCTGGCATCGATGAAGAACGCAGCGAAATGCGATAAGTAA  
TGTGAATTGCAGAATTCAGTGAATCATGAATCTTTGAACGCACATTGCGCCCATTAGTATTCTA  
GTGGGCATGCCTGTTTCGAGCGTCATTTCAACCCTTAAGCCTAGCTTAGTGTGGGAGCCTACCG-  
-CTTTTGCTAGCGGTAGCTCCTGAAATACAACGGCGGATCTGCGATATCCTCTGAGCGTAGTAA-  
TTTTATCTCGTTTTGACTGGAGTTGCAGCGTCTTAGCCGCTAAACCCCCCAAATTTTTAATG  
GTTGACCTCAGGTTAGTCATCCACACAATCCC-  
ATCATCATCATTCCCATCATTCCCATCTTATCATCATCGCCT----CAA-----CA-TCTTCCAACC-  
GGTGCCGAAAATCT-G-----TTTTCGCACCTGCC-CATTTTCCCAG--ACAGTTACCC-----  
---GCCGCACGACCCCGCGGTGCAAACGAAAAATTTCTTA--  
TCACAGCCCCACATCGCACAAACATTTTGGCAGCCATGCACTTTCCAAGACCCACAATGAACAA  
TTGCTGACCCCGCCAAATAGGAAGCCGCGAGCTCGGAAAGGGTTCCTTCAAGTACGCATGGG  
TTCTTGACAAGCTCAAGGCCGAGCGTGAGCGTGGTATCACCATTGATATCGCTCTCTGGAAGTT  
CGAGACCAACGAGTACAATGTCACCGTCATTGGTTAGTATCCCTGCCACACCATGTATCATGC  
ATCCGACCTT-  
GTGCTAACATGGCAACACAGATGCTCCCGGTCACCGTGACTTCATCAATGCTGCCTTTTGGTATG  
TAGCC-CATCTACCTCGACAC-GCCTCAATACGACAACCCCGCAACTCGACAAC--  
GACGTTCTCAACAACCTGCTTGGTTGAAACAAAGGAAAGACTTGATACTGACCGGTCTTAATA  
GGCAAACCATCTCTGGCGAGCACGGTCTCGACAGCAATGGAGTGTACGTACCTTTCTTGGCT  
ACTTGCTTTCCACGAACATCTCAGCTAACACTCG-  
TGGTTGTTGAGCTACAACGGTACCTCCGAGCTCCAGCTCGAGCGCATGAGCGTCTACTTCAACG  
AGGCTTCCGGCAACAAGTACGTTCTCGTGCCGCTCTCGTATCTCGAGCCCGGTACCATGGA  
TGCCGTCCGCGCCGGTCTTTTCGGTCAGCTCTCCGCCCTGACAACCTCGTCTTCGGTCAGTCCG  
GTGCC

>P\_monochaeta\_CBS\_440\_83

AGGGATCATTATAGAGTTTTCTAAACTCCCAACCCATGTGAACTTACC-

ATTGTTGCCTCGGCAGAAGCTACCTGGT--  
TACCCTACCTTGAACGGCCTACCCTGTAGCGCCTTACCCTGGAACGGCCTACCCTGTAACGGC  
TGCCGGTGGACTACCAAACCTTTGTTATTTTATTGTAATCTGAGCGTCTTATTTAATAAGTCAA  
ACTTTCAACAACGGATCTCTTGGTTCTGGCATCGATGAAGAACGCAGCGAAATGCGATAAGTAA  
TGTGAATTGCAGAATTCAGTGAATCATCGAATCTTTGAACGCACATTGCGCCCATTAGTATTCTA  
GTGGGCATGCCTGTTTCGAGCGTCATTTCAACCCTTAAGCCTAGCTTAGTGTTGGGAGCCTACCG-  
-CTTTTGCTAGCGGTAGCTCCTGAAATACAACGGCGGATCTGCGATATCCTCTGAGCGTAGTAA-  
TTTTATCTCGCTTTTACTGGAGTTGCAGCGCTTTAGCCGCTAAACCCCCAAATTTTTAATG  
GTTGACCTCAGGTTAGTCATCCACACAATCCC-  
ATCATCATCATTCCCATCATTCCCATTATCATCATCGCCT----CAA-----CA-TCTTCCAACC-  
GGTGCCGAAAATCT-G-----TTTTCGCACCTGCC-CATTTTCCAG--ACAGTTACCCC-----  
---GCCGCACGACCCCGCGGTGCAAACGAAAAATTTCTTA--  
TCACAGCCCCACATCGCACAAACATTTTGGCAGCCATGCACTTTCCAAGACCCACAATGAACAA  
TTGCTGACCCCGCCAAATAGGAAGCCGCCGAGCTCGGAAAGGGTTCCTTCAAGTACGCATGGG  
TTCTTGACAAGCTCAAGGCCGAGCGTGAGCGTGGTATCACCATTGATATCGCTCTCTGGAAGTT  
CGAGACCAACGAGTACAATGTCACCGTCATTGGTTAGTATCCCTGCCACACCATGTATCATGC  
ATCCGACCTT-  
GTGCTAACATGGCAACACAGATGCTCCCGGTCACCGTGACTTCATCAATGCTGCCTTTTGGTATG  
TAGCC-CATCTACCTCGACAC-GCCTCAATACGACAACCCCGCAACTCGACAAC--  
GACGTTCTCAACAACCTGCTTGGTTGGAAACAAAGGAAAGACTTGATACTGACCGGTCTTAATA  
GGCAAACCATCTCTGGCGAGCACGGTCTCGACAGCAATGGAGTGACGTACCCTTTCTTGGCT  
ACTTGCTTTCCACGAACATCTCAGCTAACACTCG-  
TGGTTGTTTACGCTACAACGGTACCTCCGAGCTCCAGCTCGAGCGCATGAGCGTCTACTTCAACG  
AGGCTCCGGCAACAAGTACGTTCTCGTGCCGTCTCGTATCTCGAGCCCGGTACCATGGA  
TGCCGTCCGCGCCGGTCTTTTCGGTCAGCTCTCCGCCCTGACAACTTCGTCTTCGGTCAGTCCG  
GTGCC

>P\_montellica\_MFLUCC\_12\_0279

?????CATTATAGAGTTTTCAAACCTCCAACCCATGTGAACTTACC-  
ACTGTTGCCTCGGCAGAGGCTACCCGGT---ACCT--  
CCCTGGAACGGCCTACCCTGTAGCGCCCGACC-----  
CGGGTACCCTGTAGCGGCTGCCGGTGGACCACTAAACTCTTGTATTTTATTGTAATCTGAGCG  
TCTTATATTAATAAGTCAAACCTTTCAACAACGGATCTCTTGGTTCTGGCATCGATGAAGAACGC  
AGCGAAATGCGATAAGTAATGTGAATTGCAGAATTCAGTGAATCATCGAATCTTTGAACGCACA  
TTGCGCCCATTAGTATTCTAGTGGGCATGCCTGTTTCGAGCGTCATTTCAACCCTTAAGCCTAGCT  
TAGTGTTGGGAGCCTACTAGCCCTCCGGGGCCTGTAGCTCCTGAAATACAACGGCGGATCTGTG  
ATATCCTCTGAGCGTAGTAA-TTTTTATCTCGCTTTTGTAGGATTCTCAGCATCT--  
AGCCGCTAAACCCCA-AT-TTTTTAATGGTTGACCTCAGGTTAGTCATCCTCACGACCTC-  
ATCATAC-----CATGCCACGTCCTGCCCCAAATCACCATTTTGC-----  
GTGTTGAAAATTT---TTTTTTTTTTTCGCATCTGCC-CACATTCTCTG--ACACTTACCCC-----  
-GCCGCACGACCCCGCGGTGCCAACGAAAAATTTCTTA--  
TCACAGCCCCACCTCGCACGCAA-----AAAATCATGCATTCTTCTGGACCCACATTGAGCA-  
CTGCTAACCCCGCCAATTAGGAAGCCGCCGAGCTCGGTAAGGGTTCCTTCAAGTACGCATGGG  
TTCTTGACAAGCTCAAGGCCGAGCGTGAGCGTGGTATCACCATCGATATTGCTCTCTGGAAGTT  
CGAGACCAACGAGTACAATGTCACCGTCATTGGTTAGTATCCCTATCCAGATGGAGCGTTAAGC

ATCCGACCGT-  
CGACTAACATTGCAACACAGATGCTCCCGGTACCGTGACTTCATCAATGCTGCTTTCTGGTATG  
TAGCCACGACTACCCCGACAC-GCCTCATCGCGCCG-CTTCTCGCAACTCTA-----  
CGACAATCTCGGACTAT-  
TCTGGCGGCAGCAACGTGAGAGGCATGATACTGACTGGTCTCCGACAGGCCAAACTATCTCTGG  
CGAGCACGGTCTCGACAGCAATGGAGTGACGTACCATATCCCTGACTACTCGCTTTCTGACGA  
ACATGCAAGCTAAACTTCG-  
TGGTCCAATAGTTACAACGGTACCTCCGAGCTCCAGCTCGAGCGTATGAGCGTCTACTTCAACG  
AGGCTTCCGGCAACAAGTACGTTCCCGTGCCGTCTCGTCGATCTCGAGCCCGGTACCATGGA  
TGCCGTCCGCGCCGGTCTTTTCGGTCAGCTCTTCCGCCCTGACAACTTCGTCTTCGGTCAGTCCG  
GTGCT

>P\_nanjingensis\_CSUFTCC16

????????????????????????????????????????TGTGAACTTACC-  
ATTGTTGCCTCGGCAGAAGCTGCTCGGC-  
GCGCCTTACCTTGGAACGGCCTACCCTGTAGCGCCTTACCCTGGAACGGCTTACCCTGCAACGG  
CTGCCGGTGGACTACCAAACCTTTGTTATTTTATGGTTATCTGAGCGTCTTATTTAATAAGTCAA  
AACTTTCAACAACGGATCTCTTGGTTCTGGCATCGATGAAGAACGCAGCGAAATGCGATAAGTA  
ATGTGAATTGCAGAATTCAGTGAATCATCGAATCTTTGAACGCACATTGCGCCATTAGTATTCT  
AGTGGGCATGCCTGTTTCGAGCGTCATTTCAACCCTTAAGCCTAGCTTAGTGTGGGAGCCTACT  
G--  
CTTTTGCTAGCTGTAGCTCCTGAAATACAACGGCGGATCTGCGATATCCTCTGAGCGTAGTAA-  
TTTTTATCTCGCTTTTACTGGAGTTGCAGCGTCTTAGCCGCTAAACCCCC-AA-  
TTTTAATGGTTGACCTCAGGTTAGTCATCCTCGCAATCCC-ATCATCC-----CCATT-----  
CTCATCGTCATCACCT--CGCAA---CA-TTTTCCAACC-GGTCCCGAAATTCT-G-----  
TTTTCGCACCTGCC-CACTTTCCAG--ACACTTACCCC-----  
GCCGCACGACCCCGCGGTGCAAACGAAAAATTTCTTA--TCATAGCCCCACTTCACAC-  
AACATTTTGGCAGCCACGCACTTTGCATGACCCATAATGAACAATTGCTGACCCCGCCAAATAG  
GAAGCCGCGGAGCTCGGAAAGGGTTCCTTCAAGTACGCATGGGTTCTTGACAAGCTCAAGGCC  
GAGCGTGAGCGTGGTATCACCATTGATATCGCTCTCTGGAAGTTCGAGACCAACGAGTACAATG  
TCACCGTCATTGGTTAGTATCCCTGTCCACAGAAAGTATCATGTGTCCGAACAC-  
AGACTAACATCGCGATACAGACGCTCCCGGTACCGTGATTTTCATCAATGCTGCCTTCTGGTAT  
GTAGCC-CATCTACCTCGACAC-GCCTCAATACGACA-CCCTCCGCAACTCGACGAC--  
GACATTCTCGGC---  
TTCTTGGTTGGAACCGAACCAAGACTTGATACTGACCGGTCTCTGATAGGCAAACCATCTCTG  
GCGAGCACGGTCTCGACAGCAATGGAGTGACGTACCGTTTCCTTGCCTACTTGCTTTCCACG  
AACATGTTAGCTAACACTCG-  
TGCTTGCTCAGCTACAACGGCACCTCCGAGCTCCAGCTCGAGCGCATGAGCGTCTACTTCAACG  
AGGCTTCCGGCAACAAGTACGTTCTCGTGCCGTCTCGTCGATCTCGAGCCCGGTACCATGGA  
CGCCGTCCGCGCCGGTCTTTTCGGCCAGCTCTTCCGCCCTGACAACTTCGTCTTCGGTCAGTCC  
GGTGCC

>P\_nanjingensis\_CSUFTCC20

????????????????????????????????????????TGTGAACTTACC-  
ATTGTTGCCTCGGCAGAAGCTGCTCGGC-  
GCGCCTTACCTTGGAACGGCCTACCCTGTAGCGCCTTACCCTGGAACGGCTTACCCTGCAACGG

CTGCCGGTGGACTACCAAACCTTTGTTATTTTATGGTTATCTGAGCGTCTTATTTTAATAAGTCAA  
AACTTTCAACAACGGATCTCTTGGTTCTGGCATCGATGAAGAACGCAGCGAAATGCGATAAGTA  
ATGTGAATTGCAGAATTCAGTGAATCATCGAATCTTTGAACGCACATTGCGCCATTAGTATTCT  
AGTGGGCATGCCTGTTTCGAGCGTCATTTCAACCCTTAAGCCTAGCTTAGTGTGGGAGCCTACT  
G--  
CTTTTGCTAGCTGTAGCTCCTGAAATACAACGGCGGATCTGCGATATCCTCTGAGCGTAGTAA-  
TTTTATCTCGCTTTTACTGGAGTTGCAGCGTCTTAGCCGCTAAACCCCC-AA-  
TTTTAATGGTTGACCTCAGGTTAGTCATCCTCGCAATCCC-ATCATCC-----CCATT-----  
CTCATCGTCATCACCT--CGCAA----CA-TTTCCAACC-GGTCCCGAAATTCT-G-----  
TTTTCGCACCTGCC-CACTTTCCAG--ACACTTACCC-----  
GCCGCACGACCCCGCGGTGCAAACGAAAAATTTCTTA--TCATAGCCCCACTTCACAC-  
AACATTTTGGCAGCCACGCACTTTGCATGACCCATAATGAACAATTGCTGACCCCGCCAAATAG  
GAAGCCGCGAGCTCGGAAAGGGTTCCTTCAAGTACGCATGGGTCTTGACAAGCTCAAGGCC  
GAGCGTGAGCGTGGTATCACCATTGATATCGCTCTCTGGAAGTTCGAGACCAACGAGTACAATG  
TCACCGTCATTGGTTAGTATCCCTGTCCACAGAAAGTATCATGTGTCCGAACAC-  
AGACTAACATCGCGATACAGACGCTCCCGGTACCGTGATTTTCATCAATGCTGCCTTCTGGTAT  
GTAGCC-CATCTACCTCGACAC-GCCTCAATACGACA-CCCTCCGCAACTCGACGAC--  
GACATTCTCGGC---

>P\_nanningensis\_CSUFTCC10

????????????????????????????????????????????????????????????TGTGAACTTACC-  
ATTGTTGCCTCGGCAGAAGCTGCTCGGT-  
GCACCTACCTTGAACGGCCTACCCTGTAGCGCCTTACCCTGGAACGGCTTACCCTGTAGCGG  
CTGCCGGCGGACTACCAAACCTTTGTTATTTTATTGTAATCTGAGCGTCTTATTTTAATAAGTCAA  
AACTTTCAACAACGGATCTCTTGGTTCTGGCATCGATGAAGAACGCAGCGAAATGCGATAAGTA  
ATGTGAATTGCAGAATTCAGTGAATCATCGAATCTTTGAACGCACATTGCGCCATTAGTATTCT  
AGTGGGCATGCCTGTTTCGAGCGTCATTTCAACCCTTAAGCCTAGCTTAGTGTGGGAGCCTACT  
G--  
CTTTACTAGCTGTAGCTCCTGAAATACAACGGCGGATCTGCGATATCCTCTGAGCGTAGTAA-  
TTTTATCTCGCTTTTACTGGAGTTGCAGCGTCTTAGCCGCTAAACCCCC-AA-  
TTTTAATGGTTGACCTCAGGTTAGTCATCCTCGCAATCCC-ATCATCC-----TCATC-----  
TTCATCATCACCACT--CGCAA----GA-TTCCACACC-GGTGCCGAAAATCT-G-----  
TTTTCGCACCTGCC-CATTTTCCAG--ACACTTACCC-----  
GCCGCACGACCCCGCGGTGCAAACGAAAAATTTCTTA--TCATAGCCCCACATCAC--  
AAACATTTTGGCAGCCACGCACTCTGCATGACCCACAATGAACAATTGCTGACCCCGCCAAATA  
GGAAGCCGCTGAGCTCGGAAAGGGTTCCTTCAAGTACGCATGGGTCTTGACAAGCTCAAGGC  
CGAGCGTGAGCGTGGTATCACCATTGATATCGCTCTCTGGAAGTTCGAGACCAACGAGTACAAT  
GTCACCGTCATTGGTTAGTATCCCTGCCACAACATGTGTCTATGTCTCCGAACTCAAGACTAACC

TTACAATACAGACGCTCCCGGTCACCGTGATTCATCAATGCTGCCTTCTGGTATGTAGCC-  
CATCTACCCCGACGC-GTCTCAATACGACA-CCCCGGCAACTCGACAAC--GACGTTCTCAAC-  
--

TGCTTGGTTGAAACCAAATGAAAGACTTGATACTGACCGGTCTCTGATAGGCAAACCATCTCTG  
GCGAGCACGGTCTCGACAGCAATGGAGTGACGTACCCTTCCCTGGCTACTCGCTTCTCGTG  
AACATGTCAGCTAACACTCG-

TGCTTGTTCAGCTACAACGGTACCTCCGAGCTCCAGCTCGAGCGCATGAGCGTCTACTTCAACG  
AGGCTCCGGCAACAAGTACGTTCCCTCGTGCCGTCTCGTCGATCTCGAGCCCGGTACCATGGA  
TGCCGTCCGCGCCGGTCCTTTCGGTCAGCTCTCCGCCCTGACAACCTCGTCTTCGGTCAGTCCG  
GTGCC

>P\_nanningensis\_CSUFTCC11

????????????????????????????????????????????????????????TGTGAACTTACC-

ATTGTTGCCTCGGCAGAAGCTGCTCGGT-

GCACCTTACCTTGAACGGCCTACCCTGTAGCGCCTTACCCTGGAACGGCTTACCCTGTAGCGG  
CTGCCGGCGGACTACCAAACCTTGTATTTTATTGTAATCTGAGCGTCTTATTTAATAAGTCAA  
AACTTTCAACAACGGATCTTGGTTCTGGCATCGATGAAGAACGCAGCGAAATGCGATAAGTA  
ATGTGAATTGCAGAATTCAGTGAATCATCGAATCTTTGAACGCACATTGCGCCATTAGTATTCT  
AGTGGGCATGCCTGTTGAGCGTCATTTCAACCCTTAAGCCTAGCTTAGTGTGGGAGCCTACT  
G--

CTTTTACTAGCTGTAGCTCCTGAAATACAACGGCGGATCTGCGATATCCTCTGAGCGTAGTAA-  
TTTTTATCTCGTTTTGACTGGAGTTGCAGCGTCTTAGCCGCTAAACCCCC-AA-

TTTTAATGGTTGACCTCAGTTAGTCATCCTCGCAATCCC-ATCATCC-----TCATC-----  
TTCATCATCACCACT--CGCAA----GA-TTCCACACC-GGTGCCGAAAATCT-G-----  
TTTTCGCACCTGCC-CATTTCCAG--ACACTTACCC-----

GCCGCACGACCCCGCGGTGCAAACGAAAAATTTCTTA--TCATAGCCCCACATCAC--  
AAACATTTTGGCAGCCACGCACTCTGCATGACCCACAATGAACAATTGCTGACCCCGCCAAATA  
GGAAGCCGCTGAGCTCGGAAAGGGTTCCTTCAAGTACGCATGGGTTCTTGACAAGCTCAAGGC  
CGAGCGTGAGCGTGGTATCACCATTGATATCGCTCTCTGGAAGTTGAGACCAACGAGTACAAT  
GTCACCGTCATTGGTTAGTATCCCTGCCACAACATGTGTCATGTCTCCGAACTCAAGACTAACC  
TTACAATACAGACGCTCCCGGTCACCGTGATTCATCAATGCTGCCTTCTGGTATGTAGCC-  
CATCTACCCCGACGC-GTCTCAATACGACA-CCCCGGCAACTCGACAAC--GACGTTCTCAAC-  
--

TGCTTGGTTGAAACCAAATGAAAGACTTGATACTGACCGGTCTCTGATAGGCAAACCATCTCTG  
GCGAGCACGGTCTCGACAGCAATGGAGTGACGTACCCTTCCCTGGCTACTCGCTTCTCGTG  
AACATGTCAGCTAACACTCG-

TGCTTGTTCAGCTACAACGGTACCTCCGAGCTCCAGCTCGAGCGCATGAGCGTCTACTTCAACG  
AGGCTCCGGCAACAAGTACGTTCCCTCGTGCCGTCTCGTCGATCTCGAGCCCGGTACCATGGA  
TGCCGTCCGCGCCGGTCCTTTCGGTCAGCTCTCCGCCCTGACAACCTCGTCTTCGGTCAGTCCG  
GTGCC

>P\_neolitseae\_NTUCC\_17\_011

?????CATTATAGAGTTTTCTAAACTCCCAACCCATGTGAACTTACC-

ATTGTTGCCTCGGCAGAAGCTGCTCGGC-

GCGCCTTACCTTGAACGGCCTACCCTGTAGCGCCTTACCCTGGAACGGCTTACCCTGCAACGG  
CTGCCGGTGGACTACCAAACCTTGTATTTTATGGTTATCTGAGCGTCTTATTTAATAAGTCAA

AACTTTCAACAACGGATCTCTTGGTTCTGGCATCGATGAAGAACGCAGCGAAATGCGATAAGTA  
ATGTGAATTGCAGAATTCAGTGAATCATCGAATCTTTGAACGCACATTGCGCCCATTAGTATTCT  
AGTGGGCATGCCTGTTGAGCGTCATTTCAACCCTTAAGCCTAGCTTAGTGTGGGAGCCTACT  
G--

CTTTTGCTAGCTGTAGCTCCTGAAATACAACGGCGGATCTGCGATATCCTCTGAGCGTAGTAA-  
TTTTATCTCGCTTTGACTGGAGTTGCAGCGTCTTAGCCGCTAAACCCCC-AA-  
TTTTAATGGTGC????????????ACCCCGCAT--CC-ATCATCC-----  
CATCCTCAT-ACCT--CGCAA-----CG-TTTTCCAACC-GGTGTGAAAATCG-G-----  
TTTTCGCACCTGCC-CATTTTCCCAG--ACACTTACCC-----  
GCCGCACGACCCCGCGGTGCAAACGAAAAATTTCTTA--TCACAGCCCCACTTCACAC-  
AACATTTTGGCAGCCACGCACCTTTGCATGACCCACAGTGAACAATTGCTGACCCCGCCAAATAG  
GAAGCCGCCGAGCTCGGAAAGGGTTCCTTCAAGTACGCATGGGTTCTTGACAAGCTCAAGGCC  
GAGCGTGAGCGTGGTATCACCATTGATATCGCTCTCTGGAAGTTCGAGACCAACGAGTACAATG  
TCACCGTCATTGGTTAGTATTCTGTCCACAGAATGTATCATGTCTCCGAATC-  
AGACTAACATCACAATACAGACGCTCCCGGTACCGTGATTTTCATCAA????????????????  
????????????????CATACGACA-CCCTCCGCAACTCGACGAC--GACATTCTCGGC---  
TTCTTGGTTGGAACCGAACCAAAGACTTGATACTGACCGGTCTCTGATAGGCAAACCATCTCTG  
GCGAGCACGGTCTCGACAGCAATGGAGGTACGTACCGTTCCTTGCCTACTTGCTTTCCACG  
AACATGTTAGCTAACACTCG-  
TGCTTGCTCAGCTACAACGGCACCTCCGAGCTCCAGCTCGAGCGCATGAGCGTCTACTTCAACG  
AGGCTCCGGCAACAAGTACGTTCTCGTGCCGTCTCGTATCTCGAGCCCGGTACCATGGA  
CGCCGTCCGCGCCGGTCTTTTCGCCAGCTCTTCCGCCCTGACAACTTCGTCTTCGGTCAGTCC  
GGTGCC

>P\_novae\_hollandiae\_CBS\_130973

AGGGATCATTATAGAGTTTTCTAAACTCCCAACCCATGTGAACTTACC-  
ATTGTTGCCTCGGCAGAAGCTACCCGGT---  
ACCTTACCTTGAACGGCCTACCCTGTAGCGCCTACCCTGGAACGGCTTACCCTGTAACGGCT  
GCCGGTGGACTACCAAACCTTTGTTATTTTATTGTAATCTGAGCGTCTTATTTAATAAGTCAAAA  
CTTTCAACAACGGATCTCTTGGTTCTGGCATCGATGAAGAACGCAGCGAAATGCGATAAGTAAT  
GTGAATTGCAGAATTCAGTGAATCATCGAATCTTTGAACGCACATTGCGCCCATTAGTATTCTAG  
TGGGCATGCCTGTTGAGCGTCATTTCAACCCTTAAGCCTAGCTTAGTGTGGGAGCCTACTG--  
CTTTTGCTAGCTGTAGCTCCTGAAATACAACGGCGGATCTGCGATATCCTCTGAGCGTAGTAA-  
TTTTTTCTCGCTTTGACTGGAGTTGCAGCGTCTTAGCCGCTAAACCCCC-AA-  
TTTTAATGGTTGACCTCAGTTAGTCATCCTCACAATCCC-ATCACCA-----  
TCCTCCTTATCACCACT--CGCAA---CA--TTTTAAATC-GGTGCCGAGAATCT-G-----  
TTTTCGCACCTGCC-CACATTCCCAG--ACACTTACCC-----  
GCCGCACGACCCCGCGGTGCAAAGAAAAATTTCTTA--  
TCACAGCCCCACATCGCACAAACATTTTACAGCCATGCACTTTTCATGGCCCAACATGAGGAT  
TTGCTGACCCCGCCAAATAGGAAGCCGCCGAGCTCGGAAAGGGTTCCTTCAAGTACGCATGGG  
TTCTTGACAAGCTCAAGGCCGAGCGTGAGCGTGGTATCACCATTGATATCGCTCTCTGGAAGTT  
CGAGACCAACGAGTACAATGTCACCGTCATTGGTTAGTATACCTGTCCACACCATGCATCACGC  
ATCCGAATTC-  
AGACTAACATGGCAATACAGATGCTCCCGGTACCGTGATTTTCATCAATGCTGCCTTCTGGTATG  
TAGCC-CATGTACCTCGACAC-GCCCAACACGACG-CCACCCGCAACTCGACAAC--



GACGTTCTCAAC----  
ACTGGGTTGGAACATAACGAAAGACTTGATACTGACCGGTCTCTGATAGGCAAACCATTTCTGG  
CGAGCACGGTCTCGACAGCAATGGAGTGTACGTACCCTTTTCTGGCTACTTGCT-  
TCCCACGAACATGTCAGCTAACACTCG-  
TGTTTGTTGAGCTACAACGGTACCTCCGAGCTCCAGCTCGAGCGCATGAGCGTCTACTTCAACG  
AGGCTCCGGCAACAAGTACGTTCTCGTGCCGTCTCGTATCTCGAGCCCGGTACCATGGA  
TGCCGTCCGCGCCGGTCTTTCCGGTACGCTTCCGCCCTGACAACTTCGTCTTCGGTCAGTCCG  
GTGCC

>P\_oryzae\_CBS\_353\_69

AGGGATCATTATAGAGTTTTCTAAACTCCCAACCCATGTGAACTTACC-  
ATTGTTGCCTCGGCAGAAGCTGCTCGGT-  
GCACCCTACCTTGGAACGGCCTACCCTGTAGCGCCTTACCCTGGAACGGCTTACCCTGTAACGG  
CTGCCGGTGGACTACCAAACCTTTGTTATTTTATTGTAATCTGAGCGTCTATTTTAATAAGTCAA  
AACTTTCAACAACGGATCTCTTGGTTCTGGCATCGATGAAGAACGCAGCGAAATGCGATAAGTA  
ATGTGAATTGCAGAATTCAGTGAATCATCGAATCTTTGAACGCACATTGCGCCATTAGTATTCT  
AGTGGGCATGCCTGTTGAGCGTCATTTCAACCCTTAAGCCTAGCTTAGTGTGGGAGCCTACT  
G--

CTTTTGCTAGCTGTAGCTCCTGAAATACAACGGCGGATCTGCGATATCCTCTGAGCGTAGTAAAT  
TTTTATCTCGCTTTTACTGGAGTTGCAGCGTCTTTGGCCGCTAAATCCCC-AA-  
TTTTAATGGTTGACCTCAGGTTAGTCATCCTCGCAATCCC-ATCATCC-----TCATC-----  
CTCATCATCACCT--CGCAA----CA-TTCCACACC-GGTGCCGAAAATCTGG-----  
TTTTCGCACCTGCC-CATTTTCCCAC--ACACTTACCCC-----  
GCCGCACGACCCCGCGGTGCAAACGAAAAATTTCTTA--  
TCATAGCCCCACATCACACAAACATTTTGGCAGCCACGCACTTTGCATGACCCACAATGAACAA  
TTGCTGACCCACCAAATAGGAAGCCGCCGAGCTCGGAAAGGGTTCCTTCAAGTACGCATGGG  
TTCTTGACAAGCTCAAGGCCGAGCGTGAGCGTGGTATCACCATTGATATCGCTCTCTGGAAGTT  
CGAGACCAACGAGTACAATGTCACCGTCATTGGTTAGTATCCCTGCCACAACATGCATCATGT  
CTCCGAACTCAAGACTAACCTTTCAATACAGACGCTCCCGGTACCGTGATTTTCAATGCTGC  
CTTCTGGTATGTAGCC-CATCTACCTCGACGC-GCCTCAATACGACA-  
CCCCCGGCAACTCGACCAC--GATAATCTCAAC---

TGCTTGGTTGGAACCATACGAAAGACTCGATACTGACCGGTCTATGATAGGCAAACCATCTCTG  
GCGAGCACGGTCTCGACAGCAATGGAGTGTACGTACCCTTTCCCTGGCTGTTGCTTTCTCGTG  
AACATGTCAGCTAACAGTCG-  
TGCTTGTTCAGCTACAACGGTACCTCCGAGCTCCAGCTCGAGCGCATGAGCGTCTACTTCAACG  
AGGCTCCGGCAACAAGTACGTTCTCGTGCCGTCTCGTATCTCGAGCCCGGTACCATGGA  
TGCCGTCCGCGCCGGTCTTTCCGGTACGCTTCCGCCCTGACAACTTCGTCTTCGGTCAGTCCG  
GTGCC

>P\_oryzae\_CL107

AGGGATCATTATAGAGTTTTCTAAACTCCCAACCCATGTGAACTTACC-  
ATTGTTGCCTCGGCAGAAGCTGCTCGGT-  
GCACCCTACCTTGGAACGGCCTACCCTGTAGCGCCTTACCCTGGAACGGCTTACCCTGTAACGG  
CTGCCGGTGGACTACCAAACCTTTGTTATTTTATTGTAATCTGAGCGTCTATTTTAATAAGTCAA  
AACTTTCAACAACGGATCTCTTGGTTCTGGCATCGATGAAGAACGCAGCGAAATGCGATAAGTA  
ATGTGAATTGCAGAATTCAGTGAATCATCGAATCTTTGAACGCACATTGCGCCATTAGTATTCT

AGTGGGCATGCCTGTTGAGCGTCATTTCAACCCTAAGCCTAGCTTAGTGTGGGAGCCTACT  
G--  
CTTTTGCTAGCTGTAGCTCCTGAAATACAACGGCGGATCTGCGATATCCTCTGAGCGTAGTAAAT  
TTTTATCTCGCTTTTACTGAGTTGCAGCGTCTTTGGCCGCTAAATCCCC-AA-  
TTTTAATGGTTGACCTCAGGTTAGTCATCCTCGCAATCCC-ATCATCC-----TCATC-----  
CTCATCATCACTT--CGCAA----CATTTCCACACC-GGTGTCGAAAATCTGG-----  
TTTTGCGACCTGCC-CATTTTCTCAG--ACACTTACCCC-----  
GCCGCACGACCCCGCGGTGCAAACGAAAAATTTCTTA--  
TCACAGCCCCACATCACACAAACATTTTGGCAGCCACGCACCTTGATGACCCACAATGAACAA  
TTGCTGACCCCGCCAAATAGGAAGCCGCGGAGCTCGGTAA?????????????????????  
????????????????????????????????????????????????????????  
????????????????????????????????????????????????????????  
????????????????????????????????????????????????????????  
????????????????????????????????????????????????????????  
TG  
CTGCCCTTGATGTAGCC-CATCTACCTCGACGC-GCCTCAATACGACA-  
CCCCGGAACCTCGACCAC--GATAATCTCAAC---  
TGCTTGTTGGAACCATACGAAAGACTCGATACTGACCGGTCTATGATAGGCAAACCATCTCTG  
GCGAGCACGGTCTCGACAGCAATGGAGTGTACGTACCCTTTCCCTGGCTGTTGCTTTCTCGTG  
AACATGTCAGCTAACAGTCG-  
TGCTTGTTGAGCTACAACGGTACCTCCGAGCTCCAGCTCGAGCGCATGAGCGTCTACTTCAACG  
AGGCTCCGGCAACAAGTACGTTCCTCGTGCCGTCTCGTCGATCTCGAGCCCGGTACCATGGA  
TGCCGTCCGCGCGGTCTTTCGGTCACTCTCCGCCCTGACAACTTCGTCTTCGGTCAGTCGG  
GTGCC

>P\_pallidotheae\_MAFF\_240993

???????TTACAGAGTTTTCTAAACTCCCAACCCATGTGAACTTACC-  
ATTGTTGCCTCGGAGAAAGCTACCCTGTAGCGCCTTACCCGGAACGGCCTACCCTGTAGCGCC  
TTACCCTGGAACGGCCTACCCTGTAGCGGCTGCCGGTGGACTACTCAACTCTTGTTATTTTATGG  
TTATCTGAGCGTCTTATTTAATAAGTCAAAACTTTCAACAACGGATCTCTTGTTCTGGCATCGA  
TGAAGAACGCAGCGAAATGCGATAAGTAATGTGAATTGCAGAATTCAGTGAATCATCGAATCTT  
TGAACGCACATTGCGCCATTAGTATTCTAGTGGGCATGCCTGTTTCGAGCGTCATTTCAACCCTT  
AAGCCTAGCTTAGTGTGGGAGCCTACTG--  
CTTTTGCTAGCTGTAGCTCCTGAAATACAACGGCGGATCTGCGATATCCTCTGAGCGTAGTAAAT  
TTTTTCTCGCTTTTACTGAGTTGCAGCGTCTTAGCCGCTAAACCCCC-AA-  
TTTTAATGGTT?????AGGTTAGTCATCCTCAGATTCC-ATCATCT-----  
ATCTTATCACCGTCT----CGAG----CA-TTCTCATCTC-GGTGTCGAAAATCA-----  
TTTTTTCGACCTGCC-CACGTTCCCTG--  
GCACTTACCCCGCCGCGTGGCCGCACGACCCCGCGGTGCAAACGAAAAATTTCTTA--  
TCACAGCCCCACCTCGCACAACATTTTGGCAGCCACGCACTT--  
ATGACCCACAATGAGCATTGCTGACCCCGGAAATAGGAAGCCGCGGAGCTTGGTAAGGGTT  
CCTTCAAGTACGCCTGGGTCTTGACAAGCTCAAGGCCGAGCGTGAGCGTGGTATCACCATCGA  
TATCGCTCTCTGGAAGTTCGAGACCAATGAGTACAATGTCACCGTCATTGGTCAGTATCCCTGTC  
CTCAATATGGACCATGCATTCCAACCTC-  
AGACTAACACGGCAACACAGACGCTCCCGTCAACGTCATCAATGCTGCCTTTGTTGAT  
GTGCC-CATCTACCTCGACGC-GCCTCAACACGACG-  
CCTCCCGCAACGCGACAACGCGACATTCTCCAC---  
TACCTAGTTGGAATCACACGAAAGCCTTGATACTGACCGGTCTTTGATAGGCAAACCATCTCTG

GCGAGCACGGTCTCGACAGCAATGGAGTGACGTACCCTTTCCTTGGCTACTTGCTTTCCCATG  
ACCATGTTAGCTGACACTCG-  
TGGTTGTTGCTCAGCTACAACGGTACCTCTGAGCTCCAGCTGGAGCGCATGAGCGTCTACTTCAACG  
AGGCTCCGGCAACAAGTACGTTCTCGTGCCGTCTCGTCGATCTCGAGCCCGGTACCATGGA  
TGCCGTCCGTGCCGGTCTTTCGGTCACTCTTCCGCCCTGACAACTTCGTCTTCGGTCAGTCCG  
GTGCC

>P\_papuana\_CBS\_331\_96

AGGGATCATTATAGAGTTTTCTAAACTCCCAACCCATGTGAACTTACC-  
ATTGTTGCCTCGGCAGAAGCTGCTCGGT-  
GCACCTACCTTGAACGGCCTACCCTGTAGCGCCTTACCCTGGAACGGCTTACCCTGCAACGG  
CTGCCGGTGGACTACCAAACCTTTGTTATTTTATGGTTATCTGAGCGTCTTATTTAATAAGTCAA  
AACTTTCAACAACGGATCTCTTGGTTCTGGCATCGATGAAGAACGCAGCGAAATGCGATAAGTA  
ATGTGAATTGCAGAATTCAGTGAATCATCGAATCTTTGAACGCACATTGCGCCATTAGTATTCT  
AGTGGGCATGCCTGTTGAGCGTCATTTCAACCCTTAAGCCTAGCTTAGTGTGGGAGCCTACT  
G--  
CTTTTGCTAGCTGTAGCTCCTGAAATACAACGGCGGATCTGCGATATCCTCTGAGCGTAGTAA-  
TTTTTATCTCGTTTTGACTGGAGTTGCAGCGTCTTAGCCGCTAAACCCCCC-AA-  
TTTTAATGGTTGACCTCAGGTTAGTCATGCTCACA-TCCC-ATCATCC-----TCATC-----  
--ATCATCATCGCCT--CGCAA---CA-TTTCCAACC-GGTGCCGAAATTCT-G-----  
TTTTCGCACCTGCC-CATTTTTCCAG--ACACTTACCC-----  
GCCGCACGACCCCGCGGTGCAAACGAAAAATTTCTTATCTCACAGCCCACTTACACAC-  
AACATTTTGGCAGCCACGCACTTTGCATGACCCACAATGAACAATTGCTGACCCCGCCAAATAG  
GAAGCCGCGGAGCTCGGAAAGGGTTCTTCAAGTACGCATGGGTTCTTGACAAGCTCAAGGCC  
GAGCGTGAGCGTGGTATCACCATTGATATCGCTCTCTGGAAGTTCGAGACCAACGAGTACAATG  
TCACCGTCATTGGTTAGTATCCCTGTCCATAGAAAGTATCATGTGTCCGAACTC-  
AGACTAACATCGCAATACAGACGCTCCCGGTCACCGTGATTTTCATCAATGCTGCCTTCTGGTAT  
GTAGCC-CAACTACCTCGACAC-GCCTCAATACGACA-CCCTCCACAACCTCGACGAC--  
GGCATTCTCGGC---

>P\_papuana\_MFLU\_19\_2764

?????CATTATAGAGTTTTCTAAACTCCCAACCCATGTGAACTTACC-  
ATTGTTGCCTCGGCAGAAGCTGCTCGGT-  
GCACCTACCTTGAACGGCCTACCCTGTAGCGCCTTACCCTGGAACGGCTTACCCTGCAACGG  
CTGCCGGTGGACTACCAAACCTTTGTTATTTTATGGTTATCTGAGCGTCTTATTTAATAAGTCAA  
AACTTTCAACAACGGATCTCTTGGTTCTGGCATCGATGAAGAACGCAGCGAAATGCGATAAGTA  
ATGTGAATTGCAGAATTCAGTGAATCATCGAATCTTTGAACGCACATTGCGCCATTAGTATTCT  
AGTGGGCATGCCTGTTGAGCGTCATTTCAACCCTTAAGCCTAGCTTAGTGTGGGAGCCTACT  
G--

CTTTTGCTAGCTGTAGCTCCTGAAATACAACGGCGGATCTGCGATATCCTCTGAGCGTAGTAA-  
TTTTATCTCGCTTTTACTGGAGTTGCAGCGTCTTTAGCCGCTAAACCCCC-AA-  
TTTTAATGGTTGACCTCAGGTTAGTCATGCTCACA-TCCC-ATCATCC-----TCATC-----  
--ATCATCATCGCCT--CGCAA----CA-TTTTCCAACC-GGTGCCGAAATTCT-G-----  
TTTTCGCACCTGCC-CATTTTCCAG--ACACTTACCC-----  
GCCGCACGACCCCGCGGTGCAAACGAAAAATTTCTTATCTCACAGCCCCACTTCACAC-  
AACATTTTGGCAGCCACGCACTTTGCATGACCCACAATGAACAATTGCTGACCCCGCCAAATAG  
GAAGCCGCGGAGCTCGGAAAGGGTTCCTTCAAGTACGCATGGGTCTTGACAAGCTCAAGGCC  
GAGCGTGAGCGTGGTATCACCATTGATATCGCTCTCTGGAAGTTCGAGACCAACGAGTACAATG  
TCACCGTCATTGGTTAGTATCCCTGTCCATAGAAAGTATCATGTGTCCGAACTC-  
AGACTAACATCGCAATACAGACGCTCCCGGTACCGTGATTTTCATCAATGCTGCCTTCTGGTAT  
GTAGCC-CAACTACCTCGACAC-GCCTCAATACGACA-CCCTCCACAACTCGACGAC--  
GGCATTCTCGGC---

>P\_parva\_CBS\_265\_37

AGGGATCATTATAGAGTTTTCTAAACTCCCAACCCATGTGAACTTACC-  
ATTGTTGCCTCGGCAGAAGCTGCTCGGT-  
GCACCTACCTTGAACGGCCTACCCTGTAGCGCCTTACCCTGGAACGGCTTACCCTGTAGCGG  
CTGCCGGTGGACTACCAAACCTTGTATTATTTATTGTAATCTGAGCGTCTATTTAATAAGTCAA  
AACTTTCAACAACGGATCTCTTGGTTCTGGCATCGATGAAGAACGCAGCGAAATGCGATAAGTA  
ATGTGAATTGCAGAATTCAGTGAATCATCGAATCTTTGAACGCACATTGCGCCATTAGTATTCT  
AGTGGGCATGCCTGTTGAGCGTCATTTCAACCCTTAAGCCTAGCTTAGTGTGGGAGCCTACT  
G--

CTTTACTAGCTGTAGCTCCTGAAATACAACGGCGGATCTGCGATATCCTCTGAGCGTAGTAA-  
TTTTATCTCGCTTTTACTGGAGTTGCAGCGTCTTTAGCCGCTAAACCCCC-AA--  
CTTTAATGGTTGACCTCAGGTTAGTCATCCTCGCAATCCC-ATCATCC-----TCATC-----  
--TTCATCATCCT--CGCAA----GA-TTCCACATC-GGTGCCGAAATCT-G-----  
TTTTCGCACCTGCC-CATTTTCCAG--GCAATTACCC-----  
GCCGCACGACCCCGCGGTGCAAACGAAAAATTTCTTA--TCATAGCCCCACATCAC--  
AAACATTTTGGCAGCCACGCACTCTGCATGACCCACAACGAACAATTGCTGACCCCGCCAAATA  
GGAAGCCGCGGAGCTCGGAAAGGGTTCCTTCAAGTACGCATGGGTCTTGACAAGCTCAAGGC  
CGAGCGTGAGCGTGGTATCACCATTGATATCGCTCTCTGGAAGTTCGAGACCAACGAGTACAAT  
GTCACCGTCATTGGTTAGTATCCCTGCCACAACATGTGTATGTCTCCGAACTCAAGACTAACC  
TTACAATACAGACGCTCCCGGTACCGTGATTTTCATCAATGCTGCCTTCTGGTATGTAGCC-  
CATCTACCTCGACGC-GCCTCAATACGACA-CCCCGGCAACTCGACAAC--GACATTCTCAAC-  
--

TGCTTGGTTGAAACCATACGAAAGACTTGATACTGACCGGTCTCTGATAGGCAAACCATCTCTG  
GCGAGCACGGTCTCGACAGCAATGGAGTGTACGTACCCCTTCCCTGGCTACTCGCTTCTCGT

AACATGTCAGCTAACACTCG-  
TGCTTGTTGAGCTACAACGGTACCTCCGAGCTCCAGCTCGAGCGCATGAGCGTCTACTTCAACG  
AGGCTCCGGCAACAAGTACGTTCTCGTGCCGTCTCGTATCTCGAGCCCGGTACCATGGA  
TGCCGTCCGCGCCGGTCTTTGCGTACGCTTCCGCG????????????????????????????

>P\_photinicola\_GZCC\_16\_0028

???GACATTATAGAGTTTTCTACACTCCCAACCCATGTGAACTTACC-  
ATTGTTGCCTCGGCAGAAGCTGCTCGGT-  
GCACCCTACCTTGTTACGACCTTTACTTCCGCGCCTTACCCTGGAACGGCTTACCCTGTAGCGGC  
TGCCGGTGGACTACCAAACCTTGTATTTTATTGTAATCTGAGCGTCTTATTTAATAAGTCAA  
ACTTTCAACAACGGATCTCTTGGTTCTGGCATCGATGAAGAACGCAGCGAAATGCGATAAGTAA  
TGTGAATTGCAGAATTCAGTGAATCATCGAATCTTTGAACGCACATTGCGCCCATTAGTATTCTA  
GTGGGCATGCCTGTTGAGCGTCATTTCAACCCTTAAGCCTAGCTTAGTGTGGGAGCCTACTG-  
-CTTTACTAGCTGTAGCTCCTGAAATACAACGGCGGATCTGCGATATCCTCTGAGCGTAGTAA-  
TTTTTATCTCGTTTTGACTGGAGTTGCAGCGTCTTAGCCGCTAAATCCCC-AA-  
TTTTAATGGTTGACCTCAGGTTAGTCATCCTCGCAATCCC-ATCATCC-----TCATC-----  
--CTCATCATCACCT--CGCAA----CA-TTCCACACC-GGTGCCGAAAATCTGG-----  
TTTTCGCACCTGCC-CATTTTCCAG--ACACTTACCC-----  
GCCGCACGACCCCGCGGTGCAAACGAAAAATTTCTTA--  
TCACAGCCCCACATCACACAAACATTTTGGCAGCCACGCACTTTGCATGACCCACAATGAACAA  
TTGCTGACCCCGCAAATAGGAAGCCGCGGAGCTCGGAAAGGGTTCCTTCAAGTACGCATGGG  
TTCTTGACAAGCTCAAGGCCGAGCGTGAGCGTGGTATCACCATTGATATCGCTCTCTGGAAGTT  
CGAGACCAACGAGTACAATGTCACCGTCATTGGTTAGTATCCCTGCCACAACATGTGTCATGT  
CTCTGAACTCAAGACTAACCTTGCAATACAGACGCTCCCGGTACCCGTGATTTTCATCAATGCTG  
CCTTCTGGTATGTAGCC-CATCTACCTCGACGC-  
GCCTCAATACGACACCCCGGCAACTCGACAAC--GACATTCTCAAC---  
TGCTTGTTTGAACCATAACGAAAGACTTGATACTGACCGGTCTATGATAGGCAAACCATCTCTG  
GCGAGCACGGTCTCGACAGCAATGGAGTGTACGTACCCTTCCCTGGCTACTCGCTTCTCGTG  
AACATGTCAGCTAACAGTTG-  
TGCTTGTTGAGCTACAACGGTACCTCCGAGCTCCAGCTCGAGCGCATGAGCGTCTACTTCAACG  
AGGCTCCGGCAACAAGTACGTTCTCGTGCCGTCTCGTATCTCGAGCCCGGTACCATGGA  
TGCCGTCCGCGCCGGTCTTTGCGTACGCTTCCGCGCTGACAACTTCGTCT-CGGTCA-  
TCCGGCG??

>P\_pinisp\_CBS\_146841

AGGGATCATTATAGAGTTTTCTAAACTCCCAACCCATGTGAACTTACC-  
ATTGTTGCCTCGGCAGAAGCTGCTCGGT-  
GCACCTTACCTTGAACGGCCTACCCTGTAGCGCCTTACCCTGGAACGGCTTACCCTGTAGCGG  
CTGCCGGTGGACTACCAAACCTTGTATTTTATTGTAATCTGAGCGTCTTATTTAATAAGTCAA  
AACTTTCAACAACGGATCTCTTGGTTCTGGCATCGATGAAGAACGCAGCGAAATGCGATAAGTA  
ATGTGAATTGCAGAATTCAGTGAATCATCGAATCTTTGAACGCACATTGCGCCCATTAGTATTCT  
AGTGGGCATGCCTGTTGAGCGTCATTTCAACCCTTAAGCCTAGCTTAGTGTGGGAGCCTACT  
G--  
CTTTTGCTAGCTGTAGCTCCTGAAATACAACGGCGGATCTGCGATATCCTCTGAGCGTAGTAA-  
TTTTTATCTCGTTTTGACTGGAGTTGCAGCGTCTTAGCCGCTAAATCCCC-AA-  
TTTTAATGGTTGACCTC?????????TCCTCACAATCCC-GTCATCT-----CCATT-----

CTCATCATCACCT--CGCAA---CA-TTTCCAACC-GTGCCGAAAATCT-G-----  
CTTTGCACCTGCC-CATTTCCCAG--ACACTTACCC-----  
GCCGCACGACCCCGCGGTGCAAACGAAAAATTCTTA--  
TCACAGCCCCACATCGCACAAACATTTTGGCAGCGATGCACTTTCCATGACCCACAATGAACAA  
TTGCTGACCCCGCAAATAGGAAGCCGCCGAGCTCGGAAAGGGTTCCTTCAAGTACGCATGGG  
TTCTTGACAAGCTCAAGGCCGAGCGTGAGCGTGGTATCACCATTGATATCGCTCTCTGGAAGTT  
CGAGACCAACGAGTACAATGTCACCGTCATTGGTTAGTATCCCTGTCCACACCATGTAACATGC  
AACCGATCTT-  
GTACTAACATGGCAATACAGATGCTCCCGGTCACCGTGATTTTCATCAATGCTGCCTTCTGGTACG  
TAGTC-CATCTACCTCGACAC-GCCTCAATACGACAACCCTCCGCAACTCGACAAC--  
GACCTTCTCAACAACCTGCTTGGTTGGAACCAAGAAAAGACCTGATACTGACCGGTCTCTGATA  
GGCAAACCATCTCTGGCGAGCACGGTCTCGACAGCAATGGAGTGTACGTACCCTTCTCTGGCT  
ACTTGCTTTCCACGAACATCTCAGCTAATACCCG-  
TGATTGTTTACGCTACAACGGTACCTCTGAGCTCCAGCTCGAGCGCATGAGCGTCTACTTCAACG  
AGGCTTCCGGCAACAAGTACGTTCTCTCGTGCCGTCTCTCGTATCTCGAGCCCGGTACCATGGA  
TGCCGTCCGCGCCGGTCTTTTCGGTCAGCTCTTCCGCCCTGACAACTTTGTCTTCGGTCAGTCCG  
GTGCC

>P\_portugolica\_CBS\_393\_48

AGGGATCATTATAGAGTTTTCTAAACTCCCAACCCATGTGAACTTACC-  
ATTGTTGCCTCGGCAGAAGCTACCCGGT---  
ACCTTACCTTGAACGGCCTACCCTGTAGCGCCTACCCTGGAACGGCTTACCCTGTAACGGCT  
GCCGGTGGACTACCAAACCTTTGTTATTTTATTGTTATCTGAGCGTCTATTTTAATAAGTCAAAA  
CTTTCAACAACGGATCTCTTGGTTCTGGCATCGATGAAGAACGCAGCGAAATGCGATAAGTAAT  
GTGAATTGCAGAATTCAGTGAATCATCGAATCTTTGAACGCACATTGCGCCATTAGTATTCTAG  
TGGGCATGCCTGTTGAGCGTCATTTCAACCCTTAAGCCTAGCTTAGTGTGGGAGCCTACTG--  
CTTTTGCTAGCTGTAGCTCCTGAAATACAACGGCGGATCTGCGATATCCTCTGAGCGTAGTAATT  
TTTTTCTCGCTTTTGAAGTGGAGTTGCAGCGTCTTTAGCCGCTAAATCCCC-AA-  
TTTTAATGGTTGACCTCAGGTTAGTCATCCTCGCAATCTC-ATCATGCCACCCCATC-----  
-ATCATCATCACCACT--CGCAA---CA-TCTTCAACTT-GTGCCGAAAATCT-G-----  
TTTTGCACCTGCC-CATGTTCCCAG--ACACTTACCC-----  
GCCGCACGACCCCGCGGTGCAAACGAAAAATTCTTA--  
TCACAGCCCCACATCGCACAAACATTTTGGCAGCCATGCACTTTTCATGACCCACATTGAGCATT  
TGCTGACCCCGCAAATAGGAAGCCGCCGAGCTCGGAAAGGGTTCCTTCAAGTACGCATGGG  
TCTTGACAAGCTCAAGGCCGAGCGTGAGCGTGGTATCACCATTGATATCGCTCTCTGGAAGTTC  
GAGACCAACGAGTACAATGTCACCGTCATTGGTTAGTATCCCTGTCCACAACATTGATCATGCCT  
CGGAACTC-  
AGACTAACATGGTAATACAGATGCTCCCGGTCACCGTGACTTCATCAATGCTGCCTTTTGGTATG  
TAGCC-CATCTACCTCGACAC-GCCTCAATACGACG-CCTCCCGCAGCTCGACCAC--  
GACGGCCTCAAC---  
TATTTGGTTGGAACCAACAAGACTTGATACTGACCGGTCTCTGATAGGCAAACCATCTCTG  
GCGAGCACGGTCTCGACAGCAATGGAGTGTACGTACCCTTGCTTCTCCATTTGCCTTCCACG  
AACATGTTAGCTAACACCCG-  
TGCTTGCTCAGCTACAACGGTACCTCCGAGCTCCAGCTCGAGCGCATGAGCGTCTACTTCAACG  
AGGCTTCCGGCAACAAGTACGTTCTCTCGTGCCGTCTCTCGTATCTCGAGCCCGGTACCATGGA

TGCCGTCCGCGCCGGTCCTTTCCGGTCAGCTCTCCGCCCTGACAACTTCGTCTTCGGTCAGTCCG  
GTGCC

>P\_rhizophorae\_MFLUCC\_17\_0416

AGGGATCATTATAGAGTTTTCTAAACTCCCAACCCATGTGAACTTACC-  
ATTGTTGCCTCGGCAGAAGCTGCTCGGT-  
GCACCTTACCTTGGAACGGCCTACCCTGTAGCGCCTTACCCTGGAACGGCTTACCCTGCAGCGG  
CTGCCGGTGGACTACCAAACCTTTGTTATTTTATTGTAATCTGAGCGTCTTATTTAATAAGTCAA  
AACTTTCAACAACGGATCTCTTGTTCTGGCATCGATGAAGAACGCAGCGAAATGCGATAAGTA  
ATGTGAATTGCAGAATTCAGTGAATCATCGAATCTTTGAACGCACATTGCGCCCATTAGTATTCT  
AGTGGGCATGCCTGTTTCGAGCGTCATTTCAACCCTTAAGCCTAGCTTAGTGTGGGAGCCTACT  
G--

CTTTTGCTAGCTGTAGCTCCTGAAATACAACGGCGGATCTGCGATATCCTCTGAGCGTAGTAA-  
TTTTATCTCGCTTTTACTGGAGTTGCAGCGTCTTAGCCGCTAAACCCCC-AA-  
TTTTAATGTTGACCTC??T TAGTCATCCTCGCAATCCC-ATCATCC-----TCATC-----  
TTCATCACCATCACCT--CGCAA----CA-TTCCACACC-GGTGCCGAAAATCT-G-----  
TTTTCGCACCTGCC-CATTTCCAG--ACACTTACCC-----  
GCCGCACGACCCCGCGGTGCAAACGAAAAATTTCTTA--TCATAGCCCCACATCAC--  
AAACATTTTGGCAGCCACGCACTCTGCATGACCCACAATGAACAATTGCTGACCCCGCCAAATA  
GGAAGCCGCCGAGCTCGGAAAGGGTTCCTTCAAGTACGCATGGGTTCTTGACAAGCTCAAGGC  
CGAGCGTGAGCGTGGTATCACCATTGATATCGCTCTCTGGAAGTTCGAGACCAACGAGTACAAT  
GTCACCGTCATTGGTTAGTATCCCTGCCACAACATGTGTCATGTCTCCGAACTCGAGACTAACC  
TTACAATACAGACGCTCCCGGTCACCGTGATTCATCAATGCTGCCTTCTGGTATGTAGCC-  
CATCTACCCCGACGC-GTCTCAATACGACA-CCCCGGCAACTCGACAAC--GACGTTCTCAAC-  
--

TGCTTGTTGAAACCAAATGAAAGACTTGATACTGACCGGTCTCTGATAGGCAAACCATCTCTG  
GCGAGCACGGTCTCGACAGCAATGGAGGTACGTACCCTTTCCCTGGCTACTCGCTTCTCGTG  
AACATGTCAGCTAACACTCG-  
TGCTTGTTGAGCTACAACGGTACCTCCGAGCTCCAGCTCGAGCGCATGAGCGTCTACTTCAACG  
AGGCTCCGGCAACAAGTACGTTCTCGTGCCGTCTCGTCGATCTCGAGCCCGGTACCATGGA  
TGCCGTCCGCGCCGGTCCTTTCCGGTCAGCTCTCCGCCCTGACAACTTCGTCTTCGGTCAGTCCG  
GTGCC

>P\_rhizophorae\_MFLUCC\_17\_0417

AGGGATCATTATAGAGTTTTCTAAACTCCCAACCCATGTGAACTTACC-  
ATTGTTGCCTCGGCAGAAGCTGCTCGGT-  
GCACCTTACCTTGGAACGGCCTACCCTGTAGCGCCTTACCCTGGAACGGCTTACCCTGCAGCGG  
CTGCCGGTGGACTACCAAACCTTTGTTATTTTATTGTAATCTGAGCGTCTTATTTAATAAGTCAA  
AACTTTCAACAACGGATCTCTTGTTCTGGCATCGATGAAGAACGCAGCGAAATGCGATAAGTA  
ATGTGAATTGCAGAATTCAGTGAATCATCGAATCTTTGAACGCACATTGCGCCCATTAGTATTCT  
AGTGGGCATGCCTGTTTCGAGCGTCATTTCAACCCTTAAGCCTAGCTTAGTGTGGGAGCCTACT  
G--

CTTTTGCTAGCTGTAGCTCCTGAAATACAACGGCGGATCTGCGATATCCTCTGAGCGTAGTAA-  
TTTTATCTCGCTTTTACTGGAGTTGCAGCGTCTTAGCCGCTAAACCCCC-AA-  
TTTTAATGTTGACCTC??T TAGTCATCCTCGCAATCCC-ATCATCC-----TCATC-----  
TTCATCACCATCACCT--CGCAA----CA-TTCCACACC-GGTGCCGAAAATCT-G-----

TTTTCGCACCTGCC-CATTTTCCCAG--ACACTTACCCC-----  
GCCGCACGACCCCGCGGTGCAAACGAAAAATTTCTTA--TCATAGCCCCACATCAC--  
AAACATTTTGGCAGCCACGCACTCTGCATGACCCACAATGAACAATTGCTGACCCCGCCAAATA  
GGAAGCCGCCGAGCTCGGAAAGGGTTCCTTCAAGTACGCATGGGTTCTTGACAAGCTCAAGGC  
CGAGCGTGAGCGTGGTATCACCATTGATATCGCTCTCTGGAAGTTCGAGACCAACGAGTACAAT  
GTCACCGTCATTGGTTAGTATCCCTGCCACAACATGTGTCATGTCTCCGAACTCGAGACTAACC  
TTACAATACAGACGCTCCCGGTACCGTGATTTTCATCAATGCTGCCTTCTGGTATGTAGCC-  
CATCTACCCCGACGC-GTCTCAATACGACA-CCCCGGCAACTCGACAAC--GACGTTCTCAAC-  
--  
TGCTTGGTTGAAACCAAATGAAAGACTTGATACTGACCGGTCTCTGATAGGCAAACCATCTCTG  
GCGAGCACGGTCTCGACAGCAATGGAGGTACGTACCCTTCCCTGGCTACTCGCTTCTCGTG  
AACATGTCAGCTAACACTCG-  
TGCTTGTTCAGCTACAACGGTACCTCCGAGCTCCAGCTCGAGCGCATGAGCGTCTACTTCAACG  
AGGCTCCGGCAACAAGTACGTTCTCGTGCCGTCTCGTATCTCGAGCCCGGTACCATGGA  
TGCCGTCCGCGCCGGTCTTTCGGTCAGCTCTCCGCCCTGACAACTTCGTCTTCGGTCAGTCCG  
GTGCC  
>P\_rhododendri\_IFRDCC\_2399  
?????CATTATAGAGTTTTCTAAACTCCCAACCCATGTGAACTTACC-  
ATTGTTGCCTCGGCAGAAGCTGCTCGGT-  
GCACCTTACCCTGGAACGGCCTACCCTGTAGCGCCTTACCCTGGAACGGCTTACCCTGTAGCGG  
CTGCCGGTGGACTACCAAACCTTTGTTATTTTATTGTAATCTGAGCGTCTATTTTAATAAGTCAA  
AACTTTCAACAACGGATCTCTTGGTTCTGGCATCGATGAAGAACGCAGCGAAATGCGATAAGTA  
ATGTGAATTGCAGAATTCAGTGAATCATCGAATCTTTGAACGCACATTGCGCCATTAGTATTCT  
AGTGGGCATGCCTGTTTCGAGCGTCATTTCAACCCTTAAGCCTAGCTTAGTGTGGGAGCCTACT  
G--  
CTTTTGCTAGCTGTAGCTCCTGAAATACAACGGCGGATCTGCGATATCCTCTGAGCGTAGTAA-  
TTTTATCTCGTTTTGACTGGAGTTGCAGCGTCTTTCAGCCGCTAAATCCCCT-AA-  
TTTTAATGGTTGACCTCACGTTAGTCATCCTCACAATCCC-ATCATCC-----  
CCATCATCATCGTCT--CGCAA---CA-TTTTCCAACCT-GGTGCCGAAAATCT-G-----  
TTTTCGCACCTGCC-CATTTTCCCAG--ACACTTACCCC-----  
GCCGCACGACCCCGCGGTGCAAACGAAAAATTTCTTA--  
TCACAGCCCCACATCGCACAAACATTTTGGCAGCCATGCACTTTCATGACCCACAATGAACAA  
TTGCTGACCCCGCCAAATAGGAAGCCGCCGAGCTCGGAAAGGGTTCCTTCAAGTACGCATGGG  
TTCTTGACAAGCTCAAGGCCGAGCGTGAGCGTGGTATCACCATTGATATCGCTCTCTGGAAGTT  
CGAGACCAACGAGTACAATGTCACCGTCATTGGTTAGTATCCCGGCCACACCATGTACCATGC  
ATCCGACCTT-  
GTACTAACATCACAATACAGATGCTCCCGGTACCGTGATTTTCATCAATGCTGCTTCTGGTACG  
TAGCCATATCTACCTCGACAC-GCCTCGATACGACAACCCTCCGCAACTCGACAAC--  
GACCTTCTCAACAACCTGCTTGGTTGGAACCAAAGAAAAGACCTGATACTGACCGGTCTCTGATA  
GGCAAACCATCTCTGGCGAGCACGGTCTCGACAGCAATGGAGGTGACGTACCCTTTCCTTGGCT  
ACTTGCTTTCACGAACATCTCAGCTAATACCCG-  
TGATTGTTTCAGCTACAACGGTACCTCTGAGCTCCAGCTCGAGCGCATGAGCGTCTACTTCAACG  
AGGCTCCGGCAACAAGTACGTTCTCGTGCCGTCTCGTATCTCGAGCCCGGTACCATGGA  
TGCCGTCCGCGCCGGTCTTTCGGTCAGCTCTCCGCCCTGACAACTTTGTCTTCGGTCAGTCCG



GTGCC

>P\_rhodomyrtus\_HGUP4230

AGGGATCATTATAGAGTTTTCTAAACTCCCAACCCATGTGAACTTACC-  
ATTGTTGCCTCGGCAGAAGCTGCTCGGT-  
GCACCCTACCTTGGAACGGCCTACCCTGTAGCGCCTTACCCTGGAACGGCTTACCCTGTAACGG  
CTGCCGGTGGACTACCAAACCTTTGTTATTTTATTGTAATCTGAGCGTCTTATTTAATAAGTCAA  
AACTTTCAACAACGGATCTCTTGGTTCTGGCATCGATGAAGAACGCAGCGAAATGCGATAAGTA  
ATGTGAATTGCAGAATTCAGTGAATCATCGAATCTTTGAACGCACATTGCGCCATTAGTATTCT  
AGTGGGCATGCCTGTTGAGCGTCATTTCAACCCTTAAGCCTAGCTTAGTGTGGGAGCCTACT  
G--  
CTTTTGCTAGCTGTAGCTCCTGAAATACAACGGCGGATCTGCGATATCCTCTGAGCGTAGTAAAT  
TTTTATCTCGCTTTTACTGGAGTTGCAGCGTCTTTGGCCGCTAAATCCCC-AA-  
TTTTAATGGTTGACCTCAGGTTAGTCATCCTCGCAATCCC-ATCATCC-----TCATC-----  
CTCATCATCATCACCT--CGCAA---CA-TTTCCACACC-GGTGCCGAAAATCTGG-----  
TTTTCGCACCTGCC-CATTTTCCCAG--ACACTTACCCC-----  
GCCGCACGACCCCGCGGTGCAAACGAAAAATTTCTTA--  
TCACAGCCCCACATCACACAAACATTTTGGCAGCCACGCACCTTTCATGACCCACAATGAACAA  
TTGCTGACCCCGCAAATAGGAAGCCGCGGAGCTCGGAAAGGGTTCCTCAAGTACGCATGGG  
TTCTTGACAAGCTCAAGGCCGAGCGTGAGCGTGGTATCACCATTGATATCGCTCTCTGGAAGTT  
CGAGACCAACGAGTACAATGTCACCGTCATTGGTTAGTATCCCTGCCACAACATGTGTCATGT  
CTCTGAACTCAAGACTAACCTTGCAATACAGACGCTCCCGGTCACCGTGATTTTCATCAA???????  
???GGGGGGTAGGC--ATCTACCTCGACGC-GCCTC-ATACGACA-  
CCCCCGGCAACTCGACCAC--GATAATCTCAAC---  
TGCTTGGTTGGAACCATACGAAAGACTCGATACTGACCGGTCTATGATAGGCAAACCATCTCTG  
GCGAGCACGGTCTCGACAGCAATGGAGGTACGTACCCTTCCCTGGCTGTTTCGCTTCTCGTG  
AACATGTCAGCTAACAGTCG-  
TGCTTGTTCAGCTACAACGGTACCTCCGAGCTCCAGCTCGAGCGCATGAGCGTCTACTTCAACG  
AGGCTCCGGCAACAAGTACGTTCCCTCGTGCCGTCTCGTATCTCGAGCCCGGTACCATGGA  
TGCCGTCCGCGCCGGTCTTTTCGGTCAGCTCTCCGCCCTGACAACTTCGTCTTCGGTCAGTCCG  
GTGCC

>P\_rhodomyrtus\_MG7

AGGGATCATTATAGAGTTTTCTAAACTCCCAACCCATGTGAACTTACC-  
ATTGTTGCCTCGGCAGAAGCTGCTCGGT-  
GCACCCTACCTTGGAACGGCCTACCCTGTAGCGCCTTACCCTGGAACGGCTTACCCTGTAACGG  
CTGCCGGTGGACTACCAAACCTTTGTTATTTTATTGTAATCTGAGCGTCTTATTTAATAAGTCAA  
AACTTTCAACAACGGATCTCTTGGTTCTGGCATCGATGAAGAACGCAGCGAAATGCGATAAGTA  
ATGTGAATTGCAGAATTCAGTGAATCATCGAATCTTTGAACGCACATTGCGCCATTAGTATTCT  
AGTGGGCATGCCTGTTGAGCGTCATTTCAACCCTTAAGCCTAGCTTAGTGTGGGAGCCTACT  
G--  
CTTTTGCTAGCTGTAGCTCCTGAAATACAACGGCGGATCTGCGATATCCTCTGAGCGTAGTAAAT  
TTTTATCTCGCTTTTACTGGAGTTGCAGCGTCTTTGGCCGCTAAATCCCC-AA-  
TTTTAATGGTTGACCTC????????????????????????????????????????????????TCATCATCATC  
ACCT--CGCAA---CA-TTTCCACACC-GGTGCCGAAAATCTGG-----  
TTTTCGCACCTGCC-CATTTTCCCAG--ACACTTACCCC-----

GCCGCACGACCCCGCGGTGCAAACGAAAAATTTCTTA--  
TCACAGCCCCACATCACACAAACATTTTGGCAGCCACGCACTTTGCATGACCCACAATGAACAA  
TTGCTGACCCCGCAAATAGGAAGCCGCCGAGCTCGGAAAGGGTTCCTTCAAGTACGCATGGG  
TTCTTGACAAGCTCAAGGCCGAGCGTGAGCGTGGTATCACCATTGATATCGCTCTCTGGAAGTT  
CGAGACCAACGAGTACAATGTCACCGTCATTGGTTAGTATCCCTGCCACAACATGTGTCATGT  
CTCTGAACTCAAGACTAACCTTGCAATACAGACGCTCCCGGTCACCGTGATTTTCATCAA??CTGC  
TTTCTGGTATGTAGCC-CATCTACCTCGACGC-GCCTCAATACGACA-  
CCCCCGCAACTCGACCAC--GATAATCTCAAC---  
TGCTTGGTTGGAACCATACGAAAGACTCGATACTGACCGGTCTATGATAGGCAAACCATCTCTG  
GCGAGCACGGTCTCGACAGCAATGGAGTGTACGTACCCTTTCCCTGGCTGTTTCGCTTTCTCGTG  
AACATGTCAGCTAACAGTCG-  
TGCTTGTTCAGCTACAACGGTACCTCCGAGCTCCAGCTCGAGCGCATGAGCGTCTACTTCAACG  
AGGCTTCCGGCAACAAGTACGTTCCCTCGTGCCGTCTCGTCGATCTCGAGCCCGGTACCATGGA  
TGCCGTCCGCGCCGGTCTTTCCGGTCAGCTCTTCCGCCCTGACAACTTCGTCTTCGGTCAGTCCG  
GTGCC

>P\_rosea\_MFLUCC\_12\_0258

?????CATTATAGAGTTTTCTAAACTCCCAACCCATGTGAACTTACC-  
ATTGTTGCCTCGGCAGAAGCTGCTCGGT-  
ACACCTTACCTTGAACGGCCTACCCTGTAGCGCCTTACCCTGGAACGGCTTACCCTGTAACGG  
CTGCCGGTGGACTACCAAACCTTTGTTATTTTATTGTAATCTGAGCGTCTTATTTAATAAGTCAA  
AACTTTCAACAACGGATCTCTTGGTTCTGGCATCGATGAAGAACGCAGCGAAATGCGATAAGTA  
ATGTGAATTGCAGAATTCAGTGAATCATCGAATCTTTGAACGCACATTGCGCCATTAGTATTCT  
AGTGGGCATGCCTGTTTCGAGCGTCATTTCAACCCTTAAGCCTAGCTTAGTGTGGGAGCCTACT  
G--

CTTTTACTAGCTGTAGCTCCTGAAATACAACGGCGGATCTGCGATATCCTCTGAGCGTAGTAA-  
TTTTATCTCGCTTTTACTGGAGTTGCAGCGTCTTAGCCGCTAAATCCCC-AA-  
TTTTAATGGTTGACCTCAGGTTAGTCATCCTCGCATTCCC-ATCATCC-----  
TCATCCTCATCACCT--CGCAA----CA-TTCCACACT-GGTGCCGAAAATCTGG-----  
TTTTCGCACCTGCC-CATTTTCCCAG--ACACTTACCC-----

GCCGCACGACCCCGCGGTGCAAACGAAAAATTTCTTA--  
TCACAGCCCCACATCACACAAACATTTTGGCAGCCACGCACTTTGCATGACCCACAATGAACAA  
TTGCTGACCCCGCTAAATAGGAAGCCGCCGAGCTCGGAAAGGGTTCCTTCAAGTACGCATGGG  
TTCTTGACAAGCTCAAGGCCGAGCGTGAGCGTGGTATCACCATTGATATCGCTCTCTGGAAGTT  
CGAGACCAACGAGTACAATGTCACCGTCATTGGTTAGTATCCCTGCCACACCATGCATCATGT  
CTTCGAACTCAAGACTAACCTTGCAATACAGACGCTCCCGGTCACCGTGATTTTCATCAATGCTG  
CTTTCTGGTATGTAGCC-CATCTACCTCGACGC-GCCTCAATACGACA-  
CCACCGCAACTCGACAAC--GACATTCTCAAC---  
TGCTTGGTTGAAACCAAAAGAAAGACCTGATACTGACCGGTCTTTGATAGGCAAACCATCTCTG  
GCGAGCACGGTCTCGACAGCAATGGAGTGTACGTACCCTTTCCCTGGCTACTCGTTTTTCCACG  
AACATGTCAGCTAACAGTCG-  
TGCTTGTTCAGCTACAACGGTACCTCCGAGCTCCAGCTCGAGCGCATGAGCGTCTACTTCAACG  
AGGCTTCCGGTAACAAGTACGTTCCCTCGTGCCGTCTCGTCGATCTCGAGCCCGGTACCATGGA  
TGCCGTCCGCGCCGGTCTTTCCGGTCAGCTCTTCCGCCCTGACAACTTCGTCTTCGGCCAGTCCG  
GTGCC



????????????????????????????????????????????????????????????????????????????????????  
????????????????????????????????????????????????????????????????????????????????????  
????????????????????????????????????????????????????????????????????????????????????  
????????????????????????????????????????????????????????????????????????????????????  
????????????????????????????????????????????????????????????????????????????????????  
????????????????????????????????????????????????????????????????????????????????????  
????????????????????????????????????????????????????????????????????????????????????

>P\_shandogensis\_JZB340038

AGGGATCATTATAGAGTTTTCTAAACTCCCAACCCATGTGAACTTACC-  
ATTGTTGCCTCGGCAGAAGCTGCTCGGT-  
GCACCCTACCTTGGAACGGCCTACCCTGTAGCGCCTTACCCTGGAACGGCTTACCCTGTAGCGG  
CTGCCGGTGGACTACCAAACCTTTGTTATTTTATTGTAATCTGAGCGTCTTATTTAATAAGTCAA  
AACTTTCAACAACGGATCTCTTGGTTCTGGCATCGATGAAGAACGCAGCGAAATGCGATAAGTA  
ATGTGAATTGCAGAATTCAGTGAATCATCGAATCTTTGAACGCACATTGCGCCATTAGTATTCT  
AGTGGGCATGCCTGTTGAGCGTCATTTCAACCCTTAAGCCTAGCTTAGTGTGGGAGCCTACT  
G--  
CTTTTACTAGCTGTAGCTCCTGAAATACAACGGCGGATCTGCGATATCCTCTGAGCGTAGTAA-  
TTTTTATCTCGTTTTGACTGGAGTTGCAGCGTCTTAGCCGCTAAATCCCC-AA-  
TTTTAATGGT-GACCTC????????????????????????????????????????????????????????????  
CTCATCATCACCT--CGCAA---CA-TTCCACACC-GGTGCCGAAAATCTGG-----  
TTTTCGCACCTGCC-CATTTCCAG--ACACTTACCC-----  
GCCGCACGACCCCGCGGTGCAAACGAAAAATTTCTTA--  
TCACAGCCCCACATCACACAACATTTTGGCAGCCACGCACTTTGCATGACCCACAATGAACAA  
TTGCTGACCCCGCAAATAGGAAGCCGCGGAGCTCGGAAAGGGTTCCTTCAAGTACGCATGGG  
TTCTTGACAAGCTCAAGGCCGAGCGTGAGCGTGGTATCACCATTGATATCGCTCTCTGGAAGTT  
CGAGACCAACGAGTACAATGTCACCGTCATTGGTTAGTATCCCTGCCACAACATGTGTCATGT  
CTCTGAACTCAAGACTAACCTTGCAATACAGACGCTCCCGGTACCGTGATTTTCATCAATGCTG  
CCTTCTGGTATGTAGCC-CATCTACCTCGACGC-GCCTCAATACGACA-  
CCCCCGCAACTCGACAAC--GACATTCTCAAC---  
TGCTTGTGGAAACCATACGAAAGACTTGATACTGACCGGTCTATGATAGGCAAACCATCTCTG  
GCGAGCACGGTCTCGACAGCAATGGAGGTACGTACCCCTTCCCTGGCTACTCGCTTCTCGTG  
AACATATCAGCTAACAGTCG-  
TGCTTGTTCAGCTACAACGGTACCTCCGAGCTCCAGCTCGAGCGCATGAGCGTCTACTTCAACG  
AGGCTCCGGCAACAAGTACGTTCCCTCGTGCCGTCTCGTATCTCGAGCCCGGTACCATGGA  
TGCCGTCCGCGCCGGTCTTTCGGTTCAGCTCTTCCGCCCTGACAACTTCGTCTTCGGCCAATCCG  
GAA??

>P\_shorea\_MFLUCC\_12\_0314

AGGGATCATTATAGAGTTTTCTAAACTCCCAACCCATGTGAACTTACC-  
ATTGTTGCCTCGGCAGAAGCTGCTCGGT-  
GCACCTACCTTGGAACGGCCTACCCTGTAGCGCCTTACCCTGGAACGGCTTACCCTGCAACGG  
CTGCCGGTGGACTACCAAACCTTTGTTATTTTATTGTTATCTGAGCGTCTTATTTAATAAGTCAA  
AACTTTCAACAACGGATCTCTTGGTTCTGGCATCGATGAAGAACGCAGCGAAATGCGATAAGTA  
ATGTGAATTGCAGAATTCAGTGAATCATCGAATCTTTGAACGCACATTGCGCCATTAGTATTCT  
AGTGGGCATGCCTGTTGAGCGTCATTTCAACCCTTAAGCCTAGCTTAGTGTGGGAGCCTACT  
G--

CTTTTACTAGCTGTAGCTCCTGAAATACAACGGCGGATCTGCGATATCCTCTGAGCGTAGTAA-  
TTTTTATCTCGCTTTTACTGGAGTTGCAGCGTCTTTAGCCGCTAAACCCCC--AA-  
TTTTTACTGGT-GACCTCAGGTTAGTCATCCTCGCGATCTC-ATCACCA-----  
CTCTCCCCTCATCACCT--CGCAA---CA-ATTTCCAACA-GGTGCCGAAAATCT-G-----  
TTTTCGCACCTGCC-CATTGTCCCAG--ACACTTACCCC-----  
GCCGCACGACCCCGCGGTGCAAACGAAAAATTTCTTA--TCACAGCCCCACTTCACAC-  
AACATTTTGGCAGCCACGCACTTTGCATGACCCACAA-  
AAACAATTGCTGACCCCGCCAAACAGGAAGCCGCCGAGCTCGGAAAGGGTTCCTTCAAGTACG  
CATGGGTTCTTGACAAGCTCAAGGCCGAGCGTGAGCGTGGTATCACCATTGATATCGCTCTCTG  
GAAGTTCGAGACCAACGAGTACAATGTCACCGTCATTGGTTAGTATCACTGTCCACAACATGTA  
TCATG--TCCGAACTC-  
AGACTAACGTTATCATAACAGACGCTCCCGGTCACCGTGATTTTCATCAA????????????????  
CATC-ACCTCGACAC-GCCTC-ATACGACA-CCCTCCGCAACTCGACGAC--GACATTCTCGGC-  
--  
TACTTGGTTGAAACCAAACGAAAACTTGATACTGACCGGTCTCTGTTAGGCAAACCATCTCTG  
GCGAGCACGGTCTCGACAGCAATGGAGGTACGTACCATTTACTTGGCTCCTTGCTTTCCACG  
AACACGTTAGCTAACACTCG-  
TGCTTGCTCAGCTACAACGGCACCTCCGAGCTCCAGCTCGAGCGCATGAGCGTCTACTTCAACG  
AGGCTTCCGGCAACAAGTACGTTCTCGTGCCGTCTCGTCGATCTCGAGCCCGGTACCATGGA  
CGCCGTCCGCGCCGGTCTTTCCGGCCAGCTCTCCGCCCTGACAACTTCGTCTTCGGTCAGTCC  
GGTGCC  
>P\_spathulata\_CBS\_356\_86  
AGGGATCATTATAGAGTTTTCTAAACTCCCAACCCATGTGAACTTACC-  
ACTGTTGCCTCGGCAGAAGCTACCCGGT-  
ATACCTTACCTTGAACGGCCTACCCTGTAGCGCCTACCCTGGAACGGCTTACCCTGTAGCGG  
CTGCCGGTGGACTACTAAACTCTTGTTATTTTATTGTAATCTGAGCGTCTATTTAATAAGTCAA  
AACTTTCAACAACGGATCTCTTGTTCTGGCATCGATGAAGAACGCAGCGAAATGCCATAAGTA  
ATGTGAATTGCAGAATTCAGTGAATCATCGAATCTTTGAACGCACATTGCGCCATTAGTATTCT  
AGTGGGCATGCCTGTTGAGCGTCATTTCAACCCTTAAGCCTAGCTTAGTGTGGGAGCCTACG  
G--  
CTTTTACTAGCTGTAGCTCCTGAAATACAACGGCGGATCTGCGATATCCTCTGAGCGTAGTAATT  
TTTTTCTCGCTTTTACTGGAGTTGCAGCGTCTTTAGCCGCTAAACCCCC-AA-  
TTTTAATGGTTGACCTCAGGTTAGTCATCCTCACGATCCC-AACATCA-----TCACC-----  
---ATCACTATCACCT--TGCACA---CA-TTTTCAACTC-GGTGCCGAAAATCA-G-----  
TTTTCGCGCTTGCC-CACATTCCCAG--  
ACACTTACCCCGCCGCGTGGCCGCACGACCCCGCGGTGCAAACGAAAAATTTCTTA--T--  
CAGCCCCACATCGCACAAATATTTTACAGCCATGCACTTTTACAATCCACAATGAGCAATTG  
CTGACCCCGCCAAATAGGAAGCCGCCGAGCTCGGTAAGGGTTCCTTCAAGTACGCATGGGTTT  
TTGACAAGCTCAAGGCCGAGCGCGAGCGTGGTATCACCATCGATATCGCTCTCTGGAAGTTGTA  
GACCAACGAGTACAATGTCACCGTCATTGGTCAAGTATCCCTGTCCACCAGCTGTTTCATGCATCC  
GAACTC-  
GCACTAACATGGCAATATAGATGCTCCCGGTCACCGTGATTTTCATCAATGCTGCCTTCTGGTATG  
TAGCC-TATCTACCTCGACAC-GCCTCAATACGACG-CCCCCGCAACTCGACGCC--  
GACGTTCTCAAC---TACTTGGTTGGATCCAAACGGAAGACTTGATACTGACCG---

TCTCATAGGCAAACCATCTCTGGCGAGCACGGTCTCGACAGCAATGGAGTGTACGTGCCCTTTC  
CTTGGCTACTTGCTTTCCACGAACATACTAGCTAACCCCTCG-  
TGGTTGTTTCAGCTACAACGGTACCTCCGAGCTCCAGCTCGAGCGCATGAGCGTCTACTTCAACG  
AGGCTTCTGGCAACAAGTACGTTCTCGTGCCGTCTTGTGATCTCGAGCCCGGAACCATGGA  
TGCCGTCCGCGCCGGTCTTTCCGGTCAGCTCTCCGCCCTGACAACTTCGTCTTCGGCCAGTCCG  
GTGCC

>P\_spathuliappendiculata\_CBS\_144035

???GATCATTATAGAGTTTTCTAAACTCCCAACCCATGTGAACTTACC-  
ATTGTTGCCTCGGCAGAGGCTACCCGGT----  
ACCTACCCTGGAACGGCCTACCCTGTAGCGCCTTACCCGGGAACGGACTACCCTGTAGCGGCT  
GCCGGTGGACTACTCAACTCTTGTTATTTTATTGTTATCTGAGCGTCTTATTTAATAAGTCAAAA  
CTTTCAACAACGGATCTCTTGGTTCTGGCATCGATGAAGAACGCAGCGAAATGCGATAAGTAAT  
GTGAATTGCAGAATTCAGTGAATCATCGAATCTTTGAACGCACATTGCGCCATTAGTATTCTAG  
TGGGCATGCCTGTTGAGCGTCATTTCAACCCTAAGCCTAGCTTAGTGTGGGAGCCTACTG--  
CTTTTACTAGCTGTAGCTCCTGAAATACAACGGCGGATCTGCGATATCCTCTGAGCGTAGTAA-  
TTTTTTCTCGTTTTGACTGGAGTTGCAGCGTCTTTAGCCGCTAAACCCCC-AA-  
TTTTTAATGGT???????AGGTTAGTCATCCTCACAAATGCC-ATCATCA-----  
TCCCCATCATCACTC-CCCCAAA----CA-TCTTCACCTC-GGTGTGAAAATCGAG-----  
TTTCGCACCTGCC-CACATCCTCCG--  
ACACTTACCCCGCCGCGTGGCCGCACGACCCCGCGGTGCAAACGAAAAATTTCTTA--  
TCACAGCCCCACCTCGCACAAACATTTTGG-----  
TTCATGACCCACAATGATCAAATGCTGACCCCGCCAAACAGGAAGCCGCCGAGCTCGGTAAGG  
GTTCTTCAAGTACGCCTGGGTTCTTGACAAGCTCAAGGCCGAGCGTGAGCGTGGTATCACCAT  
CGATATCGCTCTCTGGAAGTTCGAGACCAACGAGTACAATGTCACCGTCATTGGTTAGTATCCCT  
GTCCACACCAAGCGTCATGCGTCCGATCTC-  
AGACTAACTTGGCAA????????????????????????????????????TGCTGCCTTCTGGTATGTAGCC-  
CATCTACCTCGACAC-GCCTCGATACGAC-----GACGGTCCCAAC---  
TACTTGGTCGGAACCAACCAAGACTTGACACTGACCAGTCTTCGATAGGCAAACCATCTCTG  
GCGAGCACGGTCTCGACAGCAATGGAGTGTACGTACCCTTTCCTTGGCTCCCTGCTTTCCCGTG  
AACGTCTAGGCTAACACTCG-  
CGGCTGTTTCAGCTACAACGGTACCTCCGAGCTCCAGCTCGAGCGCATGAGCGTCTACTTCAACG  
AGGCTTCCGGCAACAAGTACGTTCTCGTGCCGTCTCGTCGATCTCGAGCCCGGTACCATGGA  
TGCCGTCCGCGCCGGTCTTTCCGGTCAGCTCTTCCGCCCTGACAACTTCGTCTTCGGTCAATCCG  
GTGC?

>P\_telopeae\_CBS\_114137

AGGGATCATTATAGAGTTTTCTAAACTCCCAACCCATGTGAACTTACC-  
ATTGTTGCCTCGGCAGAAGCTGCTCGGT-  
GCACCCTACCTTGAACGGCCTACCCTGTAGCGCCTTACCCTGGAACGGCTTACCCTGTAACGG  
CTGCCGGTGGACTACCAAACCTCTTGTTATTTTATTGTAATCTGAGCGTCTTATTTAATAAGTCAA  
AACTTTCAACAACGGATCTCTTGGTTCTGGCATCGATGAAGAACGCAGCGAAATGCGATAAGTA  
ATGTGAATTGCAGAATTCAGTGAATCATCGAATCTTTGAACGCACATTGCGCCATTAGTATTCT  
AGTGGGCATGCCTGTTGAGCGTCATTTCAACCCTAAGCCTAGCTTAGTGTGGGAGCCTACT  
G--  
CTTTTGTAGCTGTAGCTCCTGAAATACAACGGCGGATCTGCGATATCCTCTGAGCGTAGTAAAT

TTTTATCTCGCTTTTACTGGAGTTGCAGCGTCTTTGGCCGCTAAATCCCC-AA-  
TTTTAATGGTTGACCTC????TAGTCATCCTCGCAATCCCCATCATCC-----TCATC-----  
CTCATTATCACCACCT--CGCAA----CA-TTCCACACC-GGTGCCGAAAATCTGG-----  
TTTTCGCACCTGCC-CATTTTCCCAG--ACACTTACCC-----  
GCCGCACGACCCCGCGGTGCAAACGAAAAATTTCTTA--  
TCACAGCCCCACATCACACAAACATTTTGGCAGCCACGCACTTTGCATGACCCACAATGAACAA  
TTGCTGACCCCGCCAAATAGGAAGCCGCCGAGCTCGGAAAGGGTTCCTTCAAGTACGCATGGG  
TTCTTGACAAGCTCAAGGCCGAGCGTGAGCGTGGTATCACCATTGATATCGCTCTCTGGAAGTT  
CGAGACCAACGAGTACAATGTCACCGTCATTGGTTAGTATCCCTGTCCACAACATGTGTCATGT  
CTCTGAACTCAAGACTAACCTTGCAATACAGACGCTCCCGGTACCGTGATTTTCATCAATGCTG  
CTTTCTGGTATGTAGCC-CATCTACCTCGACGC-  
GCCTCAATACGACACCCCGGCAACTCGACAAC--GACATTCTTAAC---  
TGCTTGTTTGAACCATACAAAAGACTTGATACTGACCGGTCTATGATAGGCAAACCATCTCTG  
GCGAGCACGGTCTCGACAGCAATGGAGTGTATGTACCCTTCCCTGGCTATTTCGTTTCTCGTGA  
ACATGTCAGCTAACAGTCG-  
TGCTTGTTTCAAGCTACAACGGTACCTCCGAGCTCCAGCTCGAGCGCATGAGCGTCTACTTCAACG  
AGGCTCCGGCAACAAGTACGTTCCCTCGTGCCGTCTCGTATCTCGAGCCCGGTACCATGGA  
TGCCGTCCGCGCCGGTCTTTCCGGTCACTCTCCGCCCTGACAACTTCGTCTTCGGTCACTCCG  
GTGCC

>P\_telopeae\_CBS\_114161

AGGGATCATTATAGAGTTTCTAAACTCCCAACCCATGTGAACTTACC-  
ATTGTTGCCTCGGCAGAAGCTGCTCGGT-  
GCACCCTACCTTGAACGGCCTACCCTGTAGCGCCTTACCCTGGAACGGCTTACCCTGTAACGG  
CTGCCGGTGGACTACCAAACCTTTGTTATTTTATTGTAATCTGAGCGTCTTATTTAATAAGTCAA  
AACTTTCAACAACGGATCTCTTGGTTCTGGCATCGATGAAGAACGCAGCGAAATGCGATAAGTA  
ATGTGAATTGCAGAATTCAGTGAATCATCGAATCTTTGAACGCACATTGCGCCATTAGTATTCT  
AGTGGGCATGCCTGTTTCGAGCGTCATTTCAACCCTAAGCCTAGCTTAGTGTGGGAGCCTACT  
G--

CTTTTGTAGCTGTAGCTCCTGAAATACAACGGCGGATCTGCGATATCCTCTGAGCGTAGTAAAT  
TTTTATCTCGCTTTTACTGGAGTTGCAGCGTCTTTGGCCGCTAAATCCCC-AA-  
TTTTAATGGTTGACCTCAGTTAGTCATCCTCGCAATCCCCATCATCC-----TCATC-----  
CTCATTATCACCACCT--CGCAA----CA-TTCCACACC-GGTGCCGAAAATCTGG-----  
TTTTCGCACCTGCC-CATTTTCCCAG--ACACTTACCC-----  
GCCGCACGACCCCGCGGTGCAAACGAAAAATTTCTTA--  
TCACAGCCCCACATCACACAAACATTTTGGCAGCCACGCACTTTGCATGACCCACAATGAACAA  
TTGCTGACCCCGCCAAATAGGAAGCCGCCGAGCTCGGAAAGGGTTCCTTCAAGTACGCATGGG  
TTCTTGACAAGCTCAAGGCCGAGCGTGAGCGTGGTATCACCATTGATATCGCTCTCTGGAAGTT  
CGAGACCAACGAGTACAATGTCACCGTCATTGGTTAGTATCCCTGTCCACAACATGTGTCATGT  
CTCTGAACTCAAGACTAACCTTGCAATACAGACGCTCCCGGTACCGTGATTTTCATCAATGCTG  
CCTTCTGGTATGTAGCC-CATCTACCTCGACGC-  
GCCTCAATACGACACCCCGGCAACTCGACAAC--GACATTCTTAAC---  
TGCTTGTTTGAACCATACAAAAGACTTGATACTGACCGGTCTATGATAGGCAAACCATCTCTG  
GCGAGCACGGTCTCGACAGCAATGGAGTGTATGTACCCTTCCCTGGCTATTTCGTTTCTCGTGA  
ACATGTCAGCTAACAGTCG-

TGCTTGTTTCAGCTACAACGGTACCTCCGAGCTCCAGCTCGAGCGCATGAGCGTCTACTTCAACG  
AGGCTCCGGCAACAAGTACGTTCTCGTGCCGTCTCGTCGATCTCGAGCCCGGTACCATGGA  
TGCCGTCCGCGCCGGTCTTTTCGGTCAGCTCTTCCGCCCTGACAACTTCGTCTTCGG?????????  
??

>P\_thailandica\_MFLUCC\_17\_1616

AGGGATCATTATAGAGTTTTCTAAACTCCCAACCCATGTGAACTTACC-  
ATTGTTGCCTCGGCAGAAGCTGCTCGGT-  
GCACCTTACCTTGAACGGCCTACCCTGTAGCGCCTTACCCTGGAACGGCTTACCCTGCAACGG  
CTGCCGGTGGACTACCAAACCTTTGTTATTTTATTGTAATCTGAGCGTCTTATTTAATAAGTCAA  
AACTTTCAACAACGGATCTCTTGGTTCTGGCATCGATGAAGAACGCAGCGAAATGCGATAAGTA  
ATGTGAATTGCAGAATTCAGTGAATCATCGAATCTTTGAACGCACATTGCGCCATTAGTATTCT  
AGTGGGCATGCCTGTTTCGAGCGTCATTTCAACCCTTAAGCCTAGCTTAGTGTGGGAGCCTACT  
G--  
CTTTTACTAGCTGTAGCTCCTGAAATACAACGGCGGATCTGCGATATCCTCTGAGCGTAGTAAAT  
TTTTATCTCGCTTTTACTGGAGTTGCAGCGTCTTTAGCCGCTAAATCCCC-AA-  
TTTTAATGGTTGACCTC??TAGTCATCCTCGCAATCCC-ATCATCC-----TCATC-----  
TTCATCACCATCACCT--CGCAA----CA-TTCCACACC-GGTGCCGAAAATCT-G-----  
TTTTCGCACCTGCC-CATTTTCCCAG--ACACTTACCC-----  
GCCGCACGACCCCGCGGTGCAAACGAAAAATTTCTTA--TCATAGCCCCACATCAC--  
AAACATTTTGGCAGCCACGCACTCTGCATGACCCACAATGAACAATTGCTGACCCCGCCAAATA  
GGAAGCCGCCGAGCTCGGAAAGGGTTCCTTCAAGTACGCATGGGTTCTTGACAAGCTCAAGGC  
CGAGCGTGAGCGTGGTATCACCATGATATCGCTCTCTGGAAGTTCGAGACCAACGAGTACAAT  
GTCACCGTCATTGGTTAGTATCCCTGCCACAACATGTGTCATGTCTCCGAACTCGAGACTAACC  
TTACAATACAGACGCTCCCGGTACCGTGATTTTCATCAATGCTGCCTTCTGGTATGTAGCC-  
CATCTACCCCGACGC-GTCTCAATACGACA-CCCCGGCAACTCGACAAC--GACGTTCTCAAC-  
--

TGCTTGTTGAAACCAAATGAAAGACTTGATACTGACCGGTCTCTGATAGGCAAACCATCTCTG  
GCGAGCACGGTCTCGACAGCAATGGAGGTACGTACCCTTTCCCTGGCTACTCGCTTTCTCGTG  
AACATGTCAGCTAACACTCG-  
TGCTTGTTTCAGCTACAACGGTACCTCCGAGCTCCAGCTCGAGCGCATGAGCGTCTACTTCAACG  
AGGCTCCGGCAACAAGTACGTTCTCGTGCCGTCTCGTCGATCTCGAGCCCGGTACCATGGA  
TGCCGTCCGCGCCGGTCTTTTCGGTCAGCTCTTCCGCCCTGACAACTTCGTCTTCGGTCAGTCCG  
GTGCC

>P\_thailandica\_MFLUCC\_17\_1617

AGGGATCATTATAGAGTTTTCTAAACTCCCAACCCATGTGAACTTACC-  
ATTGTTGCCTCGGCAGAAGCTGCTCGGT-  
GCACCTTACCTTGAACGGCCTACCCTGTAGCGCCTTACCCTGGAACGGCTTACCCTGCAACGG  
CTGCCGGTGGACTACCAAACCTTTGTTATTTTATTGTAATCTGAGCGTCTTATTTAATAAGTCAA  
AACTTTCAACAACGGATCTCTTGGTTCTGGCATCGATGAAGAACGCAGCGAAATGCGATAAGTA  
ATGTGAATTGCAGAATTCAGTGAATCATCGAATCTTTGAACGCACATTGCGCCATTAGTATTCT  
AGTGGGCATGCCTGTTTCGAGCGTCATTTCAACCCTTAAGCCTAGCTTAGTGTGGGAGCCTACT  
G--  
CTTTTACTAGCTGTAGCTCCTGAAATACAACGGCGGATCTGCGATATCCTCTGAGCGTAGTAAAT  
TTTTATCTCGCTTTTACTGGAGTTGCAGCGTCTTTAGCCGCTAAATCCCC-AA-



TTTTAATGGTTGACCTC??T TAGTCATCCTCGCAATCCC-ATCATCC-----TCATC-----  
TTCATCACCATCACCT--CGCAA---CA-TTCCACACC-GGTGCCGAAAATCT-G-----  
TTTTCGCACCTGCC-CATTTTCCCAG--ACACTTACCC-----  
GCCGCACGACCCCGCGGTGCAAACGAAAAATTTCTTA--TCATAGCCCCACATCAC--  
AACATTTTGGCAGCCACGCACTCTGCATGACCCACAATGAACAATTGCTGACCCCGCCAAATA  
GGAAGCCGCCGAGCTCGGAAAGGGTTCCTTCAAGTACGCATGGGTTCTTGACAAGCTCAAGGC  
CGAGCGTGAGCGTGGTATCACCATTGATATCGCTCTCTGGAAGTTCGAGACCAACGAGTACAAT  
GTCACCGTCATTGGTTAGTATCCCTGCCACAACATGTGTCATGTCTCCGAACCTCGAGACTAACC  
TTACAATACAGACGCTCCCGGTCACCGTGATTCATCAATGCTGCCTTCTGGTATGTAGCC-  
CATCTACCCCGACGC-GTCTCAATACGACA-CCCCGGCAACTCGACAAC--GACGTTCTCAAC-  
--

TGCTTGGTTGAAACCAAATGAAAGACTTGATACTGACCGGTCTCTGATAGGCAAACCATCTCTG  
GCGAGCACGGTCTCGACAGCAATGGAGGTACGTACCCTTCCCTGGCTACTCGCTTCTCGTG  
AACATGTCAGCTAACACTCG-  
TGCTTGTTCAGCTACAACGGTACCTCCGAGCTCCAGCTCGAGCGCATGAGCGTCTACTTCAACG  
AGGCTCCGGCAACAAGTACGTTCCCTCGTGCCGTCTCGTATCTCGAGCCCGGTACCATGGA  
TGCCGTCCGCGCCGGTCTTTCGGTTCAGCTCTCCGCCCTGACAACTTCGTCTTCGGTTCAGTCCG  
GTGCC

>P\_trachycarpicola\_IFRDCC\_2240

?????CATTATGGAGTTTTCTAAACTCCCAACCCATGTGAACTTACC-  
ATTGTTGCCTCGGCAGAAGCTGCTCGGT-  
GCACCCTACCTTGGAACGGCCTACCCTGTAGCGCCTTACCCTGGAACGGCTTACCCTGTAACGG  
CTGCCGGTGGACTACCAAACCTTTGTTATTTATTGTAATCTGAGCGTCTATTTAATAAAGTCAA  
AACTTTCAACAACGGATCTCTTGGTCTGGCATCGATGAAGAACGCAGCGAAATGCGATAAGTA  
ATGTGAATTGCAGAATTCAGTGAATCATCGAATCTTTGAACGCACATTGCGCCATTAGTATTCT  
AGTGGGCATGCCTGTTGAGCGTCATTTCAACCCTTAAGCCTAGCTTAGTGTGGGAGCCTACT  
G--

CTTTTGCTAGCTGTAGCTCCTGAAATACAACGGCGGATCTGCGATATCCTCTGAGCGTAGTAAAT  
TTTTATCTCGCTTTTACTGGAGTTGCAGCGTCTTTGGCCGCTAAATCCCC-AA-  
TTTTAATGGTTGACCTCAGGTTAGTCATCCTCGCAATCCC-ATCATCC-----TCATC-----  
CTCATCATCACTT--CGCAA---CATTTCCACACC-GGTGTCGAAAATCTGG-----  
TTTTCGCACCTGCC-CATTTTCTCAG--ACACTTACCC-----  
GCCGCACGACCCCGCGGTGCAAACGAAAAATTTCTTA--  
TCACAGCCCCACATCACACAAACATTTTGGCAGCCACGCACCTTGCATGACCCACAATGAACAA  
TTGCTGACCCCGCCAAATAGGAAGCCGCCGAGCTCGGAAAGGGTTCCTTCAAGTACGCATGGG  
TTCTTGACAAGCTCAAGGCCGAGCGTGAGCGTGGTATCACCATTGATATCGCTCTCTGGAAGTT  
CGAGACCAACGAGTACAATGTCACCGTCATTGGTTAGTATCCCTGCCACAATATGTGTCATGT  
CTCTGAACTCAAGACTAACCTTGCAATACAGACGCTCCCGGTCACCGTGATTCATCAATGCTG  
CTTTCTGGTATGTAGCC-CATCTACCTCGACGC-GCCTCAATACGACA-  
CCCCGGCAACTCGACCAC--GATAATCTCAAC---

TGCTTGGTTGGAACCATACGAAAGACTCGATACTGACCGGTCTATGATAGGCAAACCATCTCTG  
GCGAGCACGGTCTCGACAGCAATGGAGGTACGTACCCTTCCCTGGCTGTTTCGCTTCTCGTG  
AACATGTCAGCTAACAGTCCG-  
TGCTTGTTCAGCTACAACGGTACCTCCGAGCTCCAGCTCGAGCGCATGAGCGTCTACTTCAACG

AGGCTCCGGCAACAAGTACGTTCTCGTGCCGTCCTCGTCGATCTCGAGCCCGGTACCATGGA  
TGCCGTCCGCGCCGGTCCTTTCGGTCAGCTCTCCGCCCTGACAACTTCGTCTTCGGTCAGTCCG  
GTGCC

>P\_unicolor\_MFLUCC\_12\_0276

?????CATTATAGAGTTTTCTAAACTCCCAACCCATGTGAACTTACC-  
ATTGTTGCCTCGGCAGAAGCTACCTGGT--  
TACCTTACCTTGGAACGGCCTACCCTGTAGCGCCTTACCCTGGAACGGCCTACCCTGTAACGGC  
TGCCGGTGGACTACCAAACCTTTGTTATTTTATTGTAATCTGAGCGTCTTATTTAATAAGTCAA  
ACTTTCAACAACGGATCTCTTGGTTCTGGCATCGATGAAGAACGCAGCGAAATGCGATAAGTAA  
TGTGAATTGCAGAATTCAGTGAATCATCGAATCTTTGAACGCACATTGCGCCCATTAGTATTCTA  
GTGGGCATGCCTGTTTCGAGCGTCATTTCAACCCTTAAGCCTAGCTTAGTGTGGGAGCCTACTG-  
-CTTTTGCTAGCGGTAGCTCCTGAAATACAACGGCGGATCTGCGATATCCTCTGAGCGTAGTAA-  
TTTTATCTCGTTTTGACTGGAGTTGCAGCGTCTTAGCCGCTAAACCCCCAAA-  
TTTTAATGTTGACCTC????????????????????????????????????????????????  
????????????????????????????????????????????????????????????????  
????????????????????????????????????????????????????????????????  
????????????????????????????????????????????????????????????????  
????????????????????????????????????????????????????????????????  
????????????????????????????????????????????????????????????????  
????????????????????????????????????????????????????????????????  
TGCTGCTTCTGGTATGTAGCC-CATCTACCTCGACAC-  
GCCTCAATACGACAACCCCCCGCAACTCGACAAC--  
GACGTTCTCAACAAGTGCTTGGTTGGAAACAAGGGAAAGACTTGATACTGACCGGTCCCTGATA  
GGCAAACCATCTCTGGCGAGCACGGTCTCGACAGCAATGGAGTGTACGTACCCTTTCCTTGGCT  
ACTTGCTTCCACGAACATCTCAGCTAACACTCG-  
TGGTTTTTCAGCTACAACGGTACCTCCGAGCTCCAGCTCGAGCGCATGAGCGTCTACTTCAACG  
AGGCTCCGGCAACAAGTACGTTCTCGTGCCGTCCTCGTCGATCTCGAGCCCGGTACCATGGA  
TGCCGTCCGCGCCGGTCCTTTCGGTCAGCTCTCCGCCCTGACAACTTCGTCTTCGGTCAGTCCG  
GTGCC

>P\_verruculosa\_MFLUCC\_12\_0274

?????CATTATAGAGTTTTCTAAACTCCCAACCCATGTGAACTTACC-  
ATTGTTGCCTCGGCAGAAGCTACCTGGT--  
TACCCTACCTTGGAACGGCCTACCCTGTAGCGCCTTACCCTGGAACGGCCTACCCTGTAACGGC  
TGCCGGTGGACTACCAAACCTTTGTTATTTTATTGTAATCTGAGCGTCTTATTTAATAAGTCAA  
ACTTTCAACAACGGATCTCTTGGTTCTGGCATCGATGAAGAACGCAGCGAAATGCGATAAGTAA  
TGTGAATTGCAGAATTCAGTGAATCATCGAATCTTTGAACGCACATTGCGCCCATTAGTATTCTA  
GT-GGCATGCCTGTTTCGAGCGTCATTTCAACCCTTAAGCCTAGCTTAGTGTGGGAGCCTACCG-  
-CTTTTGCTAGCGGTAGCTCCTGAAATACAACGGCGGATCTGCGATATCCTCTGAGCGTAGTAA-  
TTTTATCTCGTTTTGACTGGAGTTGCAGCGTCTTAGCCGCTAAACCCCCAAATTTTTAATG  
GTTGACCTCAGGTTAGTCATCCACACAATCCC-ATCATT-  
CCATCATTCCCACCTTATCATCATCGCCT----CAAA----CA-TCTTCCAACC-  
GGTGCCGAAAATCT-G-----TTTTCGCGCCTGCC-CATTTTCCCAG--GCACTTACCCC-----  
---GCCGCACGACCCCGCGGTGCAAACGAAAAATTTCTTA--  
TCACAGCCCCACATCGCACAAACATTTTGGCAGCCATGCACTTTCCAAGACCCACAATGAACAA  
TTGCTGACCCCGCAAATAGGAAGCCGCCGAGCTCGGAAAGGGTTCCTTCAAGTACGCATGGG

TTCTTGACAAGCTCAAGGCCGAGCGTGAGCGTGGTATCACCATTGATATCGCTCTCTGGAAGTT  
CGAGACCAACGAGTACAATGTCACCGTCATTGGTTAGTATCCCTGCCACACGATGTATCATGT  
ATCCGACCTT-GTGCTAACATGGCAACACAGATGCTCCCGGTACCCGTA-  
TTCATCAA????????????????????????????????????????????????????????  
????????????????????????????????????????????????????????????????  
????????????????????????????????????????????????????????????????  
????????????????????????????????????????????????????????????????  
????????????????????????????????????????????????????????????????  
????????????????????????????????????????????????????????????????

>P\_yanglingensis\_LC4553

????????????????????????????????????????????????????????????????  
ACCCATGTGAACTTACC-  
ATTGTTGCCTCGGCAGAAGCTACCCGGT---  
ACCTTACCTTGAACGGCCTACCCTGTAGCGCCTACCCTGGAACGGCCTACCCTGCAGCGGCT  
GCCGGTGGACTACCAAACCTTTGTTATTTTATGTTATCTGAGCGTCTATTTAATAAGTCAAAA  
CTTTCAACAACGGATCTTGGTTCTGGCATCGATGAAGAACGCAGCGAAATGCGATAAGTAAT  
GTGAATTGCAGAATTCAGTGAATCATCGAATCTTTGAACGCACATTGCGCCATTAGTATTCTAG  
TGGGCATGCCTGTTGAGCGTCATTTCAACCCTAAGCCTAGCTTAGTGTGGGAGCCTACTG--  
CTTTTGTAGCTGTAGCTCCTGAAATACAACGGCGGATCTGCGATATCCTCTGAGCGTAGTAATT  
TTTTCTCGCTTTTACTGGAGTTGCAGCGTCTTTAGCCGCTAAACCCCCC-AA-  
TTTTAATGTTGACCTC????????????????????CAACCCC-ATCATCC-----  
TCACTATCATTACCT--CGCAA---CA-TTCCAAACC-  
GGTGTGAAAATCTGGTGTCTTTTTTCGCGCCTGCC-CACATTCCCAG--ACACTTACCCC----  
----GCCGCACGACCCCGCGGTGCAAACGAAAATTTCTTA--  
TCACAGCCCCACATCGCACAAACATTTTGGCAGCCATGCACTTTTCATAACCCAC-  
ACGAGCATTGCTGACCCCGCCAAACAGGAAGCCGCCGAGCTCGGAAAGGGTTCCTTCAAGTA  
CGCATGGGTTCTTGACAAGCTCAAGGCCGAGCGTGAGCGTGGTATCACCATCGATATCGCTCTC  
TGGAAGTTGAGACCAACGAGTACAATGTCACCGTCATTGGTTAGTATCCCTGTCCACAACATC  
CATCATGCATCCGAAATC-  
AGACTAACACGGCACCACAGATGCTCCCGGTACCCGTGATTTTATCAATGCTGCTTTCTGGTATG  
TAGCT-CATCTACCTCGACGC-GCCTCAGCGGACG-CCTCTCGCAACTCGACAAC--  
GACGTTATCAAC---  
TACTTGGTTGAAACCAAGCGAAAGACTTGATACTGACAGGCCTCTGATAGGCAAACCATCTCTG  
GCGAGCACGGTCTCGACAGCAATGGAGTGTACGTACCGTACCCTTGGCTACCTACT-  
TCCCACGAACATGTCAGCTAACACTTG----  
TGGTTCAGCTACAACGGTACCTCCGAGCTCCAGCTCGAGCGCATGAGCGTCTACTTCAACGAGG  
CTTCCGGCAACAAGTACGTTCCCTCGTGCCGTCCTCGTGCATCTCGAGCCCGGTACCATGGATGC  
CGTCCGCGCCGGTCTTTTCGGTACGCTCTCCGCCCTGACAACTTCGTCTTCGGTCAGTCCGGTG  
CC

>Pestalotiopsis\_appendiculata\_CGMCC\_3\_23550

????????????????????????????????????????????????????????????????  
CTCCCAACCCATGTGAACTTACC-  
ATTGTTGCCTCGGCAGAAGCTACCTGGT--  
TACCTTACCTTGAACGGCCTACCCTGTAGCGCCTACCCTGGAACGGCCTACCCTGTAACGGC  
TGCCGGTGGACTACCAAACCTTTGTTATTTTATTGTAATCTGAGCGTCTATTTAATAAGTCAAA  
ACTTTCAACAACGGATCTTGGTTCTGGCATCGATGAAGAACGCAGCGAAATGCGATAAGTAA  
TGTGAATTGCAGAATTCAGTGAATCATCGAATCTTTGAACGCACATTGCGCCATTAGTATTCTA

GTGGGCATGCCTGTTGAGCGTCATTTCAACCCTTAAGCCTAGCTTAGTGTTGGGAGCCTACTG-  
-CTTTTGCTAGCGGTAGCTCCTGAAATACAACGGCGGATCTGCGATATCCTCTGAGCGTAGTAA-  
TTTTATCTCGCTTTGACTGGAGTTGCAGCGTCTTAGCCGCTAAACCC????????????????  
????????????????????C---CAACC-----  
-----GGTGCCGAGAATCT-G-----TTTCGCATCTGCC-CATTTTCCCAG--  
ACACTTACCC-----GCCGCACGACCCCGCGGTGCAAACGAAAAATTTCTTA--  
TCACAGCCCCACATCGCACAAACATTTGCGCAGCCATGCACTTTCCAAGACCCACAATGAACAT  
TTGCTGACCCCGCAAATAGGAAGCCGCGAGCTCGGAAAGGGTTCCTTCAAGTACGCATGGG  
TTCTTGACAAGCTCAAGGCCGAGCGTGAGCGTGGTATCACCATCGATATCGCTCTCTGGAAGTT  
CGAGACCAACGAGTACAATGTCACCGTCATTGGTTAGTATTCCTGTCCACACGATGTACCATGC  
ATCTGAATGT-  
ATACTAACATGGCAACACAGATGCTCCCGGTCACCGTGA????????????????????TATGTAGGA  
-CCTCTACCTCGACAC-GCCTCAATACGACAACCCCGCAACTCGACAAC--  
GACGTTCTCAACAAGTGCTTGGTTGGAAACAAGGGAAAGACTTGATACTGACCGGTCCCTGATA  
GGCAAACCATCTCTGGCGAGCACGGTCTCGACAGCAATGGAGTGTACGTACCCTTTCCTTAGCT  
ACTTGCTTCCACGAACATCTTAGCTAACACTCG-  
TGGTTGTTGAGCTACAACGGTACCTCCGAGCTCCAGCTCGAGCGCATGAGCGTCTACTTCAACG  
AGGCTCCGGCAACAAGTACGTTCTCGTGCCGCTCTCGTATCTCGAGCCCGGTACCATGGA  
TGCCGTCGCGCCGGTCTTTCGGTCAGCTCTCCGCCCTGACAACTTCGTCTTCGGTCAGTCCG  
GTGCC  
>Pestalotiopsis\_cangshanensis\_CGMCC\_3\_23544  
????????????????????????????????????????CTTACC-  
ATTGTTGCCTCGGCAGAAGCTGCTCGGT-  
GCACCTACCCTGGAACGGCCTACCCTGTAGCGCCTTACCCTGGAACGGCTTACCCTGTAGCGG  
CTGCCGGTGGACTACCAAACCTTGTATTATTTATTGTAATCTGAGCGTCTATTTAATAAGTCAA  
AACTTTCAACAACGGATCTCTTGGTTCTGGCATCGATGAAGAACGCAGCGAAATGCGATAAGTA  
ATGTGAATTGCAGAATTCAGTGAATCATCGAATCTTTGAACGCACATTGCGCCATTAGTATTCT  
AGTGGGCATGCCTGTTGAGCGTCATTTCAACCCTTAAGCCTAGCTTAGTGTTGGGAGCCTACT  
G--  
CTTTTGCTAGCGGTAGCTCCTGAAATACAACGGCGGATCTGCGATATCCTCTGAGCGTAGTAA-  
TTTTATCTCGCTTTGACTGGAGTTGCAGCGTCTTAGCCGCTAAATCCCC-AA-  
TTTTAATGGTTGACCTC????????????????CAATCCC-ATCATT-----CCATC-----  
CTCATCATCACCT--CGCAA----CA-TTTCCAAC-TGGTGCCGAAAATCT-G-----  
TTTTCGCACCTGCC-CATTTTCCCAG--ACACTTACCC-----  
GCCGCACGACCCCGCGGTGCAAACGAAAAATTTCTTA--  
TCACAGCCCCACATCGCACAAACATTTGGCAGTCATGCACTTTCCAAGACCCACAATGAACAA  
TTGCTGACCCCGCAAATAGGAAGCCGCGAGCTCGGAAAGGGTTCCTTCAAGTACGCATGGG  
TTCTTGACAAGCTCAAGGCCGAGCGTGAGCGTGGTATCACCATTGATATCGCTCTCTGGAAGTT  
CGAGACCAACGAGTACAATGTCACCGTCATTGGTTAGTATCCCTGTCCACACGATGTACCATGC  
ATCCGACCTT-  
GTACTAACATGGCAATCCAGATGCTCCCGGTCACCGTGATTTATCAA????????????????  
ACTCTA-CTCGACGC-GCCCTCATACGACA-CCCCGGCAACTCGACCAC--GATAATCTCAAC-  
--  
TGCTTGGTTGGAACCATACGAAAGACTCGATACTGACCGGTCTATGATAGGCAAACCATCTCTG

GCGAGCACGGTCTCGACAGCAATGGAGTGACGTACCCTTTCCCTGGCTGTTGCTTTCTCGTG  
AACATGTCAGCTAACAGTCG-  
TGCTTGTTGCTAGCTACAACGGTACCTCCGAGCTCCAGCTCGAGCGCATGAGCGTCTACTTCAACG  
AGGCTTCCGGCAACAAGTACGTTCTCGTGCCGTCTCGTCGATCTCGAGCCCGGTACCATGGA  
TGCCGTCCGCGCCGGTCTTTCCGGTCAGCTCTCCGCCCTGACAACTTCGTCTTCGGTCAGTCCG  
GTGCC

>Pestalotiopsis\_chiaroscuro\_BRIP\_72970

?????CATTATAGAGTTTTCTAAACTCCCAACCCATGTGAACTTACC-  
ATTGTTGCCTCGGCAGAAGCTGCTCGGT-  
GCACCTTACCTTGAACGGCCTACCCTGTAGCGCCTTACCCTGGAACGGCTTACCCTGCAACGG  
CTGCCGGTGGACTACCAAACCTTTGTTATTTTATGGTTATCTGAGCGTCTTATTTAATAAGTCAA  
AACTTTCAACAACGGATCTCTTGGTTCTGGCATCGATGAAGAACGCAGCGAAATGCGATAAGTA  
ATGTGAATTGCAGAATTCAGTGAATCATCGAATCTTTGAACGCACATTGCGCCATTAGTATTCT  
AGTGGGCATGCCTGTTGAGCGTCATTTCAACCCTTAAGCCTAGCTTAGTGTGGGAGCCTACT  
G--

CTTTTGCTAGCGGTAGCTCCTGAAATACAACGGCGGATCTGCGATATCCTCTGAGCGTAGTAA-  
TTTTTATCTCGTTTTGACTGGAGTTGCAGCGTCTTAGCCGCTAAACCCCC-AA-  
ATTTAATGGTTGACCTCAGGTTAGTCATGCTCAAAGTCCC-ATCATCC-----TCATC-----  
---ATCATCATCGCCT--CGCAA---CA-TTTTCCAACC-GGTGCCGAAATTCT-G-----  
TTTTCGCACCTGCC-CATTTTCCCAG--ACACTTACCC-----  
GCCGCACGACCCCGCGGTGCAAACGAAAAATTTCTTA--TCACAGCCCACTTCACAC-  
AACATTTTGGCAGCCACGCACTTTGCATGACCCACAATGAACAATTGCTGACCCCGCCAAATAG  
GAAGCCGCGGAGCTCGGAAAGGGTTCTTCAAGTACGCATGGGTTCTTGACAAGCTCAAGGCC  
GAGCGTGAGCGTGGTATCACCATTGATATCGCTCTCTGGAAGTTCGAGACCAACGAGTACAATG  
TCACCGTCATTGGTTAGTATCCCTGTCCACAGAAAGTATCATGTGTCCGAACTC-  
AGACTAACATCGCAATACAGACGCTCCCGGTACCGTGATTTTCATCAATGCTGCCTTCTGGTAT  
GTAGCC-CATCTACCTCGACAC-GCCTCAATACGACA-CCCTCCGCAACTCGACGAC--  
GGCATTCTCGGC---

TACTTGGTTGGAACCAAACGAAAGACTTGATACTGACCGGTCTCTGATAGGCAAACCATCTCTG  
GCGAGCACGGTCTCGACAGCAATGGAGTGACGTACCCTTCCCTGGCTACTTGCTTTCCACG  
AACATGTTAGCTAACACTCG-  
TGCTTGCTCAGCTACAACGGCACCTCCGAGCTCCAGCTCGAGCGCATGAGCGTCTACTTCAACG  
AGGCTTCCGGCAACAAGTACGTTCTCGTGCTGTCTCGTCGATCTCGAGCCCGGTACCATGGA  
CGCCGTCCGCGCCGGTCTTTCCGGCAGCTCTCCGCCCTGACAACTTCGTCTTCGGTCAGTCC  
GGTGCC

>Pestalotiopsis\_daliensis\_CGMCC\_3\_23548

????????????????????????????CTCCCAACCCATGTGAACTTACC-  
ATTGTTGCCTCGGCAGAAGCTACCTGGT--  
TACCTTACCTTGAACGGCCTACCCTGTAGCGCCTTACCCTGGAACGGCCTACCCTGTAACGGC  
TGCCGGTGGACTACCAAACCTTTGTTATTTTATTGTAATCTGAGCGTCTTATTTAATAAGTCAA  
ACTTTCAACAACGGATCTCTTGGTTCTGGCATCGATGAAGAACGCAGCGAAATGCGATAAGTAA  
TGTGAATTGCAGAATTCAGTGAATCATCGAATCTTTGAACGCACATTGCGCCATTAGTATTCTA  
GTGGGCATGCCTGTTGAGCGTCATTTCAACCCTTAAGCCTAGCTTAGTGTGGGAGCCTACTG-  
-CTTTTGCTAGCGGTAGCTCCTGAAATACAACGGCGGATCTGCGATATCCTCTGAGCGTAGTAA-

TTTTATCTCGCTTTTACTGGAGTTGCAGCGTCTTAGCCGCTA?????????????????????????  
???GTAATCATC-----TTCC-ATCCTCA-----TCATCATCGCCT--  
CGCAA----CA-TTTTCCAACC-GGTGCCGAGAATCT-G-----TTTCGCATCTGCC-  
CATTTTCCCAG--ACACTTACCCC-----  
GCCGCACGACCCCGCGGTGCAAACGAAAAATTTCTTA--  
TCACAGCCCCACATCGCACAAACATTTTGGCAGCCATGCACTTTCCAAGACCCACAATGAACAT  
TTGCTGACCCCGCAAATAGGAAGCCGCCGAGCTCGGAAAGGGTTCCTTCAAGTACGCATGGG  
TTCTTGACAAGCTCAAGGCCGAGCGTGAGCGTGGTATCACCATCGATATCGCTCTCTGGAAGTT  
CGAGACCAACGAGTACAATGTCACCGTCATTGGTTAGTATCCCTGTCCACACGATGTACCATGC  
ATCTGAATGT-  
ATACTAACATGGCAACACAGATGCTCCCGGTCACCGTGA????????????????????GGTATGTAGC  
C-CATCTACCTCGACAC-GCCTCATTACGACAACCCCCCGCAACTCGACAAC--  
GACGTTCTCAACAAGTGCTTGCTTGGAAATAAGGGAAAGACTTGATACTGACCGGTCCCTGATA  
GGCAAACCATCTCTGGCGAGCACGGTCTCGACAGCAATGGAGTGTATGTATCCTTTCCTTGGCT  
ACTTGCTTTCCACGAACATCTCAGCTAACACTCG-  
TGGTTGTTTACAGTACAACGGTACCTCCGAGCTCCAGCTCGAGCGCATGAGCGTCTACTTCAACG  
AGGCTCCGGCAACAAGTACGTTCCCTCGTGCCGTCTCGTATCTCGAGCCCGGTACCATGGA  
TGCCGTCCGCGCCGGTCTTTCGGTCAGCTTTCGCCCTGACAACTTCGTCTTCGGTCAGTCCG  
GTGCC

>Pestalotiopsis\_fusoidea\_CGMCC\_3\_23545

????????????????????????????????????????????????????????????CGGCAGAAGCTGCTCGGT-  
GCACCTTACCCTGGAACGGCCTACCCTGTAGCGCCTTACCCTGGAACGGCTTACCCTGTAGCGG  
CTGCCGGTGGACTACCAAACCTTTGTTATTTTATTGTAATCTGAGCGTCTATTTAATAAAGTCAA  
AACTTTCAACAACGGATCTCTTGGTTCTGGCATCGATGAAGAACGCAGCGAAATGCGATAAGTA  
ATGTGAATTGCAGAATTCAGTGAATCATCGAATCTTTGAACGCACATTGCGCCATTAGTATTCT  
AGTGGGCATGCCTGTTTCGAGCGTCATTTCAACCCTTAAGCCTAGCTTAGTGTGGGAGCCTACT  
G--  
CTTTTGTAGCTGTAGCTCCTGAAATACAACGGCGGATCTGCGATATCCTCTGAGCGTAGTAA-  
TTTTATCTCGCTTTTACTGGAGTTGCAACGTCTTAGCCGCTAAATCCCC-AA-  
TTTTAATGGTTGACCTC?????ACCATCAT-----TCCC-ATCATCA-----  
TCATCGTCGCCT--TGCGAA----CA-TTCCCAACC-GGTGCCGAAATTCT-G-----  
TTTTCGCACCTGCC-CACTTTCCCAG--ACACTTACCCC-----  
GCCGCACGACCCCGCGGTGCAAACGAAAAATTTCTTA--  
TCACAGCCCCACATCGCACAAACATTTTGGCAGCCATGCACTTTCCATGACCCACAATGAACCA  
TTGCTGACCCCGCAAATAGGAAGCCGCCGAGCTCGGAAAGGGTTCCTTCAAGTACGCATGGG  
TTCTTGACAAGCTCAAGGCCGAGCGTGAGCGTGGTATCACCATTGATATCGCTCTCTGGAAGTT  
CGAGACCAACGAGTACAATGTCACCGTCATTGGTTAGTATCCCTGTCTACACAATGTACCATGC  
ATCCGACCTT-  
GTACTAACATGGCAATCCAGATGCTCCCGGTCACCGTGATTTTCATCAA????????????????AGT  
C-CATCTACCTCGACAC-GCCTCATTACGACAACCTCCGCAACTCGACAAC--  
GACGTTCTCAACAACACTGCTTGGTTGGAACCAAGAAAAGACCTGATACTGACCGGTCTCTGATA  
GGCAAACCATCTCTGGTGGAGCACGGTCTCGACAGCAATGGAGTGTACGTACCCTTTCCTTGGCT  
ACTTGCTTTCCACGAACATGTCAGCTAACACTCG-  
TGGTTGTTTACAGTACAACGGTACCTCCGAGCTCCAGCTCGAGCGCATGAGCGTCTACTTCAACG

AGGCTCCGGTAACAAGTACGTTCTCGTGCCGTCCTTGTCGATCTCGAGCCCGGTACCATGGA  
TGCCGTCCGCGCCGGTCCTTTCCGGTCAGCTCTCCGCCCTGACAACTTTGTCTTCGGTCAGTCCG  
GTGCC

>Pestalotiopsis\_hispanicaCBS115391

?????CATTATAGAGTTTTCTAAACTCCCAACCCATGTGAACTTACC-  
ATTGTTGCCTCGGCAGAAGCTGCTCGGT-

ACACCCTACCTTGGAACGGCCTACCCTGTAGCGCCTTACCCTGGAACGGCTTACCCTGTAACGG  
CTGCCGGTGGACTACCAAACCTTTGTTATTTTATTGTAATCTGAGCGTCTTATTTAATAAGTCAA  
AACTTTCAACAACGGATCTCTTGTTCTGGCATCGATGAAGAACGCAGCGAAATGCGATAAGTA  
ATGTGAATTGCAGAATTCAGTGAATCATCGAATCTTTGAACGCACATTGCGCCATTAGTATTCT  
AGTGGGCATGCCTGTTGAGCGTCATTTCAACCCTTAAGCCTAGCTTAGTGTGGGAGCCTACT  
G--

CTTTACTAGCTGTAGCTCCTGAAATACAACGGCGGATCTGCGATATCCTCTGAGCGTAGTAAAT  
TTTTATCTCGCTTTTACTGGAGTTGCAGCGTCTTTAGCCGCTAAATCCCC-AA-

TTTTAATGGTTGACCTC????????ATCCTCGCAATCCC-ATCATCCTCATCATCATC-----

ATCATCATCACCACT--CGCAA----CG-TTGCCACACC-GGTGCCGAAAATCTGG-----

TTTTCGCACCTGCC-CATTTCCAG--ACACTTACCC-----

GCCGCACGACCCCGCGGTGCAAACGAAAAATTTCTTA--

TCATAGCCCCACATCACACAAACATTTTGGCAGCCACGCACTTTGCATGACCCACAATGAACAA

TTGCTGACCCCGCAAATAGGAAGCCGCGAGCTCGGAAAGGGTTCCTCAAGTACGCATGGG

TTCTTGACAAGCTCAAGGCCGAGCGTGAGCGTGGTATCACCATTGATATCGCTCTCTGGAAGTT

CGAGACCAACGAGTACAATGTCACCGTCATTGGTTAGTATCCCTGTCCACAACATGTGTCATGT

CTCCAAACTCAAGACTAACCTTGCAATACAGACGCTCCCGGTACCGTGATTTTCATCAATGCTG

CCTTCTGGTATGTAGCC-CATCTACCTCGACGC-

GCCTCAATACGACACCCCGGGCATCACGACAAC--GACATTCTCAAC---

TGCTTGTTTGAACCATAACGAAAGACTTGATACTGACCGGTCTATGATAGGCAAACCATCTCTG

GCGAGCACGGTCTCGACAGCAATGGAGGTACGTACCCTTTCTCTGGCTACCCGCGTTCTCGTG

AAGATGTCAGCTAACAGTCG-

TGCTTGTTTAGCTACAACGGTACCTCCGAGCTCCAGCTCGAGCGCATGAGCGTCTACTTCAACG

AGGCTCCGGCAACAAGTACGTTCTCGTGCCGTCCTCGTCGATCTCGAGCCCGGTACCATGGA

TGCCGTCCGCGCCGGTCCTTTCCGGCCAGCTCTCCGCCCTGACAACTTCGTCTTCGGTCAGTCCG

GTGC?

>Pestalotiopsis\_kenyana\_CBS\_911\_96

AGGGATCATTATAGAGTTTTCTAAACTCCCAACCCATGTGAACTTACC-

ATTGTTGCCTCGGCAGAAGCTGCTCGGT-

GCACCCTACCTTGGAACGGCCTACCCTGTAGCGCCTTACCCTGGAACGGCTTACCCTGTAACGG

CTGCCGGTGGACTACCAAACCTTTGTTATTTTATTGTAATCTGAGCGTCTTATTTAATAAGTCAA

AACTTTCAACAACGGATCTCTTGTTCTGGCATCGATGAAGAACGCAGCGAAATGCGATAAGTA

ATGTGAATTGCAGAATTCAGTGAATCATCGAATCTTTGAACGCACATTGCGCCATTAGTATTCT

AGTGGGCATGCCTGTTGAGCGTCATTTCAACCCTTAAGCCTAGCTTAGTGTGGGAGCCTACT

G--

CTTTTGCTAGCTGTAGCTCCTGAAATACAACGGCGGATCTGCGATATCCTCTGAGCGTAGTAAAT

TTTTATCTCGCTTTTACTGGAGTTGCAGCGTCTTTGGCCGCTAAATCCCC-AA-

TTTTAATGGTTGACCTCAGTTAGTCATCCTCGCAATCCC-ATCATCC-----TCATC-----

CTCATCATCACTT--CGCAA----CATTTCCACACC-GGTGTCGAAAATCTGG-----  
TTTTCGCACCTGCC-CATTTTCTCAG--ACACTTACCCC-----  
GCCGCACGACCCCGCGGTGCAAACGAAAAATTTCTTA--  
TCACAGCCCCACATCACACAAACATTTTGGCAGCCACGCACCTTGCATGACCCACAATGAACAA  
TTGCTGACCCCGCCAAATAGGAAGCCGCCGAGCTCGGAAAGGGTTCCTTCAAGTACGCATGGG  
TTCTTGACAAGCTCAAGGCCGAGCGTGAGCGTGGTATCACCATTGATATCGCTCTCTGGAAGTT  
CGAGACCAACGAGTACAATGTCACCGTCATTGGTTAGTATCCCTGCCACAATATGTGTCATGT  
CTCTGAACTCAAGACTAACCTTGCAATACAGACGCTCCCGGTACCGTGATTTTCATCAATGCTG  
CCTTCTGGTATGTAGCC-CATCTACCTCGACGC-GCCTCAATACGACA-  
CCCCCGCAACTCGACCAC--GATAATCTCAAC---  
TGCTTGGTTGGAACCATACGAAAGACTCGATACTGACCGGTCTATGATAGGCAAACCATCTCTG  
GCGAGCACGGTCTCGACAGCAATGGAGTGACGTACCCTTCCCTGGCTGTTGCTTTCTCGTG  
AACATGTCAGCTAACAGTCG-  
TGCTTGTTCAGCTACAACGGTACCTCCGAGCTCCAGCTCGAGCGCATGAGCGTCTACTTCAACG  
AGGCTTCCGGCAACAAGTACGTTCTCTCGTGCCGTCTCTCGTATCTCGAGCCCGGTACCATGGA  
TGCCGTCCGCGCCGGTCTTTTCGGTCAGCTCTTCCGCCCTGACAACTTCGTCTTCGGTCAGTCCG  
GTGCC

>Pestalotiopsis\_lushanensis\_LC8182

AGGGATCATTATAGAGTTTTCTAAACTCCCAACCCATGTGAACTTACC-  
ATTGTTGCCTCGGCAGAAGCTGCTCGGT-  
GCACCTTACCCTGGAACGGCCTACCCTGTAGCGCCTTACCCTGGAACGGCTTACCCTGTAGCGG  
CTGCCGGTGGACTACCAAACCTTTGTTATTTTATTGTAATCTGAGCGTCTATTTTAATAAGTCAA  
AACTTTCAACAACGGATCTCTTGGTTCTGGCATCGATGAAGAACGCAGCGAAATGCGATAAGTA  
ATGTGAATTGCAGAATTCAGTGAATCATCGAATCTTTGAACGCACATTGCGCCATTAGTATTCT  
AGTGGGCATGCCTGTTGAGCGTCATTTCAACCCTAAGCCTAGCTTAGTGTGGGAGCCTACT  
G--  
CTTTTGCTAGCGGTAGCTCCTGAAATACAACGGCGGATCTGCGATATCCTCTGAGCGTAGTAA-  
TTTTATCTCGTTTTGACTGGAGTTGCAGCGTCTTAGCCGCTAAATCCCC-AA-  
TTTTAATGGTTGACCTCAGGTTAGTCATCCTCACAATCCC-ATCATCC-----  
CCATCATCATCGTCT--CGCAA----CA-TTTTCCAACCT-GGTGCCGAAAATCT-G-----  
TTTTCGCACCTGCC-CATTTTCCCAG--ACACTTACCCC-----  
GCCGCACGACCCCGCGGTGCAAACGAAAAATTTCTTA--  
TCACAGCCCCACATCGCACAACATTTTGGCAGCCATGCACTTTCCATGACCCACAATGAACAA  
TTGCTGACCCCGCCAAATAGGAAGCCGCCGAGCTCGGAAAGGGTTCCTTCAAGTACGCATGGG  
TTCTTGACAAGCTCAAGGCCGAGCGTGAGCGTGGTATCACCATTGATATCGCTCTCTGGAAGTT  
CGAGACCAACGAGTACAATGTCACCGTCATTGGTTAGTATCCCGGTCCACACCATGCACCATGC  
ATCCGACCTT-  
GTAATAACATACAATACAGATGCTCCCGGTACCGTGATTTTCATCAATGCTGCCTTCTGGTACG  
TAGTC-CATCTACCTCGACAC-GCCTCAATACGACAACCCTCCGCAACTCGACAAC--  
GACCTTCTCAACAACCTGCTTGGTTGGAACCAAGAAAAGACCTGATACTGACCGGTCTCTGATA  
GGCAAACCATCTCTGGCGAGCACGGTCTCGACAGCAATGGAGTGACGTACCCTTCTCTGGCT  
ACTTGCTTTCCACGAACATCTCAGCTAATACCCG-  
TGATTGTGCAGCTACAACGGTACCTCTGAGCTCCAGCTCGAGCGCATGAGCGTCTACTTCAACG  
AGGCTTCCGGCAACAAGTACGTTCTCTCGTGCCGTCTCTCGTATCTCGAGCCCGGTACCATGGA



TGCCGTCCGCGCCGGTCCTTTCCGGTCAGCTCTCCGCCCTGACAACTTTGTCTTCGGTCAGTCCG  
GTGCC

>Pestalotiopsis\_rosarioides\_CGMCC\_3\_23549

????????????????????AAACTCCCAACCCATGTGAACTTACC-  
ATTGTTGCCTCGGCAGAAGCTACCTGGT--  
TACCTTACCTTGGAACGGCCTACCCTGTAGCGCCTTACCCTGGAACGGCCTACCCTGTAACGGC  
TGCCGGTGGACTACCAAACCTTTGTTATTTTATTGTAATCTGAGCGTCTTATTTAATAAGTCAA  
ACTTTCAACAACGGATCTCTGGTTCTGGCATCGATGAAGAACGCAGCGAAATGCGATAAGTAA  
TGTGAATTGCAGAATTCAGTGAATCATCGAATCTTTGAACGCACATTGCGCCCATTAGTATTCTA  
GTGGGCATGCCTGTTTCGAGCGTCATTTCAACCCTAAGCCTAGCTTAGTGTGGGAGCCTACTG-  
-CTTTTGCTAGCGGTAGCTCCTGAAATACAACGGCGGATCTGCGATATCCTCTGAGCGTAGTAA-  
TTTTATCTCGCTTTTACTGGAGTTGCAGCGTCTTAGCCGCTAAACCCCC-AA-  
TTTTAATGTTGACCTC????????????????????????????????????????????????  
????????????????????CCAACC-GGTGCCGAGAATCT-G-----TTTTCGCATCTGCC-  
CATTTTCCCAG--ACACTTACCC--  
GCCGTACGACCCCGCGGTGCAAACGAAAAATTTCTTA--  
TCACAGCCCCACATCGCACAAACATTTTGGCAGCCATGCACTTTCCAAGACCCACAATGAACAT  
TTGCTGACCCCGCAAATAGGAAGCCGCGGAGCTCGGAAAGGGTTCCTCAAGTACGCATGGG  
TTCTTGACAAGCTCAAGGCCGAGCGTGAGCGTGGTATCACCATCGATATCGCTCTCTGGAAGTT  
CGAGACCAACGAGTACAATGTCACCGTCATTGGTTAGTATTCTGTCCACACGATGTACTATGC  
ATCTGAATGT-  
ATACTAACATGGCAACACAGATGCTCCCGGTCACCGTGATTCATCAA????????????????  
????????TCGACAC-GCCTCAATACGACAACCCCCGCAACTCGACAAC--  
GACGTTCTCAACAAGTGCTTGGTTGGAAACAAGGGAAAGACTTGATACTGACCGGTCCCTGATA  
GGCAAACCATCTCTGGCGAACACGGTCTCGACAGCAATGGAGTGACGTACCCTTTCCTTAGCT  
ACTTGCTTTCCACGAACATCTTAGCTAACACTCG-  
TGGTTGTTGAGCTACAACGGTACCTCCGAGCTCCAGCTCGAGCGCATGAGCGTCTACTTCAACG  
AGGCTCCGGCAACAAGTACGTTCTCGTGCCGTCCTCGTCGATCTCGAGCCCGGTACCATGGA  
TGCCGTCCGCGCCGGTCCTTTCCGGTCAGCTCTCCGCCCTGACAACTTCGTCTTCGGTCAGTCCG  
GTGCC

>Pestalotiopsis\_sp\_LC3637

????????????????????????????????????????????????????????????ATTGTTGCCTCGGCAGAAGCTGCTCGGT-  
GCACCCTACCTTGGAACGGCCTACCCTGTAGCGCCTTACCCTGGAACGGCTTACCCTGTAGCGG  
CTGCCGGTGGACTACCAAACCTTTGTTATTTTATTGTAATCTGAGCGTCTTATTTAATAAGTCAA  
AACTTTCAACAACGGATCTCTGGTTCTGGCATCGATGAAGAACGCAGCGAAATGCGATAAGTA  
ATGTGAATTGCAGAATTCAGTGAATCATCGAATCTTTGAACGCACATTGCGCCCATTAGTATTCT  
AGTGGGCATGCCTGTTTCGAGCGTCATTTCAACCCTAAGCCTAGCTTAGTGTGGGAGCCTACT  
G--  
CTTTTACTAGCTGTAGCTCCTGAAATACAACGGCGGATCTGCGATATCCTCTGAGCGTAGTAA-  
TTTTATCTCGCTTTTACTGGAGTTGCAGCGTCTTAGCCGCTAAATCCCC-AA-  
TTTTAATGTTGACCTCAGTTAGTCATCCTCGCAATCCC-ATCATCC-----TCATC-----  
CTCATCATCATCACCT--CGCAA----CA-TTCCACACC-GGTGCCGAAAATCTGG-----  
TTTTCGCACCTGCC-CATTTTCCCAG--ACACTTACCC--  
GCCGCACGACCCCGCGGTGCAAACGAAAAATTTCTTA--



????????????????????????????????????????????????????????????????????????????????????  
????????????????????????????????????????????????????????????????????????????????????  
????????????????????????????????????????????????????????????????????????????????????  
????????????????????????????????????????????????????????????????????????????????????  
????????????????????????????????????????????????????????????????????????????????????  
????????AGTCATCCTCGCAATCCC-ATCATCA-----TCATCACCT--  
CGCAA----CA-TTTCCACGCC-GGTGCCGAAAATCTGG-----TTTTCGCACCTGCC-  
CATTTCCCGG--ACACTTACCCC-----  
GCCGCACGACCCCGCGGTGCAAACGAAAAATTTCTTA--  
TCATAGCCCCACATCACACAAACATTTTGGCAGCCACGCACTTTGCAAGACCCACAACGAACAA  
TTGCTGACCCCGCAAATAGGAAGCCGCCGAGCTCGGAAAGGGTTCCTTCAAGTACGCATGGG  
TTCTTGACAAGCTCAAGGCCGAGCGTGAGCGTGGTATCACCATTGATATCGCTCTCTGGAAGTT  
CGAGACCAACGAGTACAATGTCACCGTCATTGGTTAGTATCCCCGTCCACAACATGCATCATGT  
CTCCGAACTCAAGACTAACCTTGCCATACAGATGCTCCCGGTCACCGTGATTTTCATCAATGCTGC  
CTTCTGGTATGTAGCC-CATCTACCCCGACGC-GTCTCAATACGACA-  
CCCCCGGCAACTCGACAAC--GACGTTCTCAAC---  
TGCTTGGTTGAAACCAAATGAAAGACTTGATACTGACCGGTCTCTGATAGGCAAACCATCTCTG  
GCGAGCACGGTCTCGACAGCAATGGAGGTACGTACCCTTCCCTGGCTACTCGCTTTCTCGTG  
AACATGTCAGCTAACACTCG-  
TGCTTGTTGAGCTACAACGGTACCTCCGAGCTCCAGCTCGAGCGCATGAGCGTCTACTTCAACG  
AGGCTTCCGGCAACAAGTACGTTCCCTCGTGCCGTCTCGTATCTCGAGCCCGGTACCATGGA  
TGCCGTCCGCGCCGGTCTTTCGGTACGCTCTCCGCCCTGACAACTTCGTCT????????????????
